# Supplementary material for: Role of efficient testing and contact tracing in mitigating the COVID-19 pandemic: a network modelling study
Source: PubMed Central journal article supplement — BMJ Open. 2021 Jul 7;11(7):e045886. doi: 10.1136/bmjopen-2020-045886 (PMC8266432; doi:10.1136/bmjopen-2020-045886), 2021-07-07
Supplement: bmjopen-2020-045886.draft_revisions.pdf [file bmjopen-2020-045886.draft_revisions.pdf]

# BMJ Open

BMJ Open is committed to open peer review. As part of this commitment we make the peer review history of every article we publish publicly available.

When an article is published we post the peer reviewers' comments and the authors' responses online. We also post the versions of the paper that were used during peer review. These are the versions that the peer review comments apply to.

The versions of the paper that follow are the versions that were submitted during the peer review process. They are not the versions of record or the final published versions. They should not be cited or distributed as the published version of this manuscript.

BMJ Open is an open access journal and the full, final, typeset and author-corrected version of record of the manuscript is available on our site with no access controls, subscription charges or pay-per-view fees (<http://bmjopen.bmj.com>).

If you have any questions on BMJ Open's open peer review process please email [info.bmjopen@bmj.com](mailto:info.bmjopen@bmj.com)

# BMJ Open

## A network modeling study highlights the critical role of efficient testing and contact tracing in mitigating COVID-19 pandemic

|                               |                                                                                                                                                                                                                                                                                                                                                                                                                                                                                                                                                                                                                                                                                                                                                                                                                                                                                            |
|-------------------------------|--------------------------------------------------------------------------------------------------------------------------------------------------------------------------------------------------------------------------------------------------------------------------------------------------------------------------------------------------------------------------------------------------------------------------------------------------------------------------------------------------------------------------------------------------------------------------------------------------------------------------------------------------------------------------------------------------------------------------------------------------------------------------------------------------------------------------------------------------------------------------------------------|
| Journal:                      | <i>BMJ Open</i>                                                                                                                                                                                                                                                                                                                                                                                                                                                                                                                                                                                                                                                                                                                                                                                                                                                                            |
| Manuscript ID                 | bmjopen-2020-045886                                                                                                                                                                                                                                                                                                                                                                                                                                                                                                                                                                                                                                                                                                                                                                                                                                                                        |
| Article Type:                 | Original research                                                                                                                                                                                                                                                                                                                                                                                                                                                                                                                                                                                                                                                                                                                                                                                                                                                                          |
| Date Submitted by the Author: | 14-Oct-2020                                                                                                                                                                                                                                                                                                                                                                                                                                                                                                                                                                                                                                                                                                                                                                                                                                                                                |
| Complete List of Authors:     | Hu, Yiyang; Ping An Healthcare Technology<br>Guo, Jianying; Ping An Healthcare Technology<br>Li, Guanqiao; Tsinghua University School of Medicine and Vanke School of Public Health; Tsinghua Clinical Research Institute (TCRI) , School of Medicine, Tsinghua University<br>Lu, Xi; Tsinghua University School of Medicine and Vanke School of Public Health<br>Li, Xiang; Ping An Healthcare Technology<br>Zhang, Yuan; Ping An Healthcare Technology<br>Cong, Lin; Ping An Healthcare Technology<br>Kang, Yanni; Ping An Healthcare Technology<br>Jia, Xiaoyu; Ping An Healthcare Technology<br>Shi, Xuanling; Tsinghua University School of Medicine and Vanke School of Public Health<br>Xie, Guotong; Ping An Healthcare Technology; Ping An International Smart City Technology Co., Ltd<br>Zhang, Linqi; Tsinghua University School of Medicine and Vanke School of Public Health |
| Keywords:                     | Public health < INFECTIOUS DISEASES, PUBLIC HEALTH, EPIDEMIOLOGY                                                                                                                                                                                                                                                                                                                                                                                                                                                                                                                                                                                                                                                                                                                                                                                                                           |
|                               |                                                                                                                                                                                                                                                                                                                                                                                                                                                                                                                                                                                                                                                                                                                                                                                                                                                                                            |

SCHOLARONE™  
Manuscripts

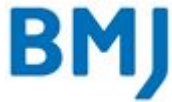

I, the Submitting Author has the right to grant and does grant on behalf of all authors of the Work (as defined in the below author licence), an exclusive licence and/or a non-exclusive licence for contributions from authors who are: i) UK Crown employees; ii) where BMJ has agreed a CC-BY licence shall apply, and/or iii) in accordance with the terms applicable for US Federal Government officers or employees acting as part of their official duties; on a worldwide, perpetual, irrevocable, royalty-free basis to BMJ Publishing Group Ltd ("BMJ") its licensees and where the relevant Journal is co-owned by BMJ to the co-owners of the Journal, to publish the Work in this journal and any other BMJ products and to exploit all rights, as set out in our [licence](#).

The Submitting Author accepts and understands that any supply made under these terms is made by BMJ to the Submitting Author unless you are acting as an employee on behalf of your employer or a postgraduate student of an affiliated institution which is paying any applicable article publishing charge ("APC") for Open Access articles. Where the Submitting Author wishes to make the Work available on an Open Access basis (and intends to pay the relevant APC), the terms of reuse of such Open Access shall be governed by a Creative Commons licence – details of these licences and which [Creative Commons](#) licence will apply to this Work are set out in our licence referred to above.

Other than as permitted in any relevant BMJ Author's Self Archiving Policies, I confirm this Work has not been accepted for publication elsewhere, is not being considered for publication elsewhere and does not duplicate material already published. I confirm all authors consent to publication of this Work and authorise the granting of this licence.

1  
2  
3  
4 **A network modeling study highlights the critical role of efficient**  
5  
6 **testing and contact tracing in mitigating COVID-19 pandemic**  
7  
8  
9

10  
11  
12 **Yiying Hu, MS <sup>a</sup>, Jianying Guo, PhD <sup>a</sup>, Guanqiao Li, PhD <sup>d e</sup>, Xi Lu, PhD <sup>e</sup>, Xiang**  
13 **Li, PhD <sup>a</sup>, Yuan Zhang, MS <sup>a</sup>, Lin Cong, MS <sup>a</sup>, Yanni Kang, MS <sup>a</sup>, Xiaoyu Jia,**  
14 **BA <sup>a</sup>, Xuanling Shi, PhD <sup>e</sup>, Guotong Xie, PhD <sup>a b c+</sup>, Linqi Zhang, PhD <sup>e+</sup>**  
15  
16

17  
18  
19 <sup>a</sup>Ping An Healthcare Technology

20 <sup>b</sup>Ping An Health Cloud Company Limited

21 <sup>c</sup>Ping An International Smart City Technology Co., Ltd.

22  
23  
24 <sup>d</sup>Tsinghua Clinical Research Institute ( TCRI ), School of Medicine, Tsinghua University,  
25  
26 Beijing, China

27  
28  
29 <sup>e</sup>School of Medicine and Vanke School of Public Health, Tsinghua University, Beijing, China

30  
31  
32  
33 + Linqi Zhang and Guotong Xie share joint correspondence in this work:

34  
35 Prof Linqi Zhang, School of Medicine and Vanke School of Public Health, Tsinghua

36  
37 University, Beijing, China

38  
39 zhanglinqi@tsinghua.edu.cn

40  
41  
42  
43 and

44  
45 Dr Guotong Xie, Ping An Healthcare Technology, Ping An Health Cloud Company Limited,  
46 Ping An International Smart City Technology Co., Ltd., Beijing, China

47  
48 xieguotong@pingan.com.cn  
49  
50  
51  
52  
53  
54  
55  
56  
57  
58  
59  
60

## Abstract

### Background:

Previous studies generally emphasize that volume of tests is important in containment of the COVID-19 epidemic. Still, few studies *quantify how the efficiency of testing and tracing* (average time interval from infection to quarantine of each individual) affect the epidemic, especially at the individual level.

### Methods:

We developed a novel individual-level network model with key parameters obtained from recent studies, to quantify impacts of efficiency of testing and tracing. It *distinguishes infection from confirmation* by integrating a stage T as confirmed by testing and quarantined. Stages such as pre-symptomatic (E), asymptomatic (I), symptomatic (Is), death with (F) or without (f) test confirmation are also included. Three scenarios were evaluated in a closed population of 3000 individuals to mimic community-level dynamic. Real-world data from four Nordic countries were also analyzed.

### Results:

1) Shortening the time interval between Is and T from 12 days to 4 days results in an 85.2% reduction in infections and 88.8% decrease in deaths. 2) Testing and tracing regardless of symptoms (7-day interval for Is to T, E/I to T interval change correspondingly) reduces 35.7 % of infections and 46.2% of deaths compared to testing Is alone. 3) A 10-day versus a 50-day delay to implement efficient testing and tracing reduces infections and deaths by 35.2% and 44.6%. The results were robust to sensitivity analyses. Analysis of the real-world data shows that tests per case in early-stage epidemics is important in reducing confirmed cases and fatality rates.

### Conclusions:

Reducing testing delays in all symptomatic and pre- and asymptomatic cases is an effective containment strategy for COVID-19 outbreaks. These results provide professionals and policy makers with quantitative evidence on the critical value of efficiency in developing testing and contact tracing strategies.

## Strengths and limitations of this study

1. This work provides a new perspective to evaluate testing and tracing effect besides tests volume at the individual level, which is the efficiency of testing and tracing (define as the average time interval for each case from initial infection to test confirmation and quarantine).
2. We quantified effects of different efficiency of testing and tracing and verified its important role in the control of COVID-19 epidemic.
3. This novel model can distinguish between the actual number of infections and confirmed cases, and can differentiate pre- and asymptomatic from symptomatic cases, and can be

1  
2  
3 further optimized to assess the effectiveness of various interventions in controlling COVID-  
4 19.  
5  
6

7 4. Limitations of this work include that all simulations were conducted in a closed population  
8 and did not account for inter-community social activity. Network sizes were also limited by  
9 computing complexity.  
10

11  
12 5. Confounders such as differences in population ageing level, medical resources, and  
13 lockdown procedures could be considered in our model in future work.  
14  
15

## 16 17 18 **Introduction**

19 Coronavirus disease 2019 (COVID-19) has posed serious public health challenges worldwide  
20 since December 2019. Warnings of recurrence are alarming as lockdown measures are being  
21 lifted, and there is no guarantee that large-scale testing alone will control the pandemic. We  
22 believe that testing policies must factor in efficiency (reducing the average time interval from  
23 initial infection to test confirmation and quarantine). Severe acute respiratory syndrome  
24 coronavirus 2 (SARS-CoV-2) is more contagious and has longer incubation time than either  
25 SARS-CoV and MERS-CoV<sup>1</sup>, and can transmit during the incubation period<sup>2,3,4,5,6</sup>. About a  
26 third of SARS-CoV-2 infectors in Spain remain asymptomatic<sup>7</sup> and contagious. If the  
27 efficiency of testing and contact tracing is low, transmission via latent, pre- and asymptomatic  
28 infected individuals may lead to more severe spread, and some transmission models applied to  
29 previous epidemic are not suitable for SARS-CoV-2. Furthermore, many models do not  
30 quantify the efficiency.  
31  
32  
33  
34  
35

36 The impact of test and quarantine interventions has been widely evaluated using different  
37 models. Some findings highlighted the volume of testing, contact tracing strategy, or  
38 combination of different interventions<sup>8,9,10,11,12,13-18</sup>. However, few focused on how efficiency  
39 of testing or contact tracing limit disease spread, and the degree to which testing efficiency and  
40 contact tracing policies contribute to containment efficacy remains unclear.  
41  
42

43 In this study, we developed a novel network model, CoTECT, based on R package Epimodel<sup>19</sup>  
44 to evaluate how testing and contact tracing efficiency affects the spread of the epidemic.  
45 CoTECT incorporates confirmed and unconfirmed infections, including the symptomatic, pre-  
46 or asymptomatic, or deceased, to simulate how the efficiency of testing and quarantine impacts  
47 epidemic outcomes. We simulated three different scenarios with controlled variables that aimed  
48 to eliminate confounding factors. Analysis of real-world data from four Nordic countries  
49 revealed that delays in counter measures adversely affect the outcome of epidemic. We provide  
50 a comprehensive and quantitative assessment of the key factors of testing and contact tracing,  
51 which will assist us in implementing more effective measures to contain the pandemic.  
52  
53  
54  
55

## 56 57 **Methods**

### 58 59 **CoTECT simulation model** 60

CoTECT is a stochastic epidemiological network model built on exponential random graphs<sup>20</sup>. It allows the user to construct a flexible network<sup>21</sup> with the desired likelihood of connection conditional on the graph with specific network properties<sup>22 23</sup>.

Based on traditional Susceptible-Exposed-Infectious-Recovered (SEIR) structure, we designed the CoTECT model with eight compartments (Figure 1):

1. Susceptible individuals (S);
2. Exposed to the virus (E), cases in incubation period. E cases are infectious based the biological characteristics of SARS-CoV-2;
3. Infections without observable symptoms (I). Some I cases become symptomatic and transfer to the Is compartment.
4. Infectious and symptomatic cases (Is) are more likely to appear in the T compartment than I or E cases, as symptomatic cases are easier to detect.
5. Test-positive cases with quarantine (T); we assumed all cases confirmed by testing were immediately quarantined.
6. Test-positive fatalities (F);
7. Fatality without a positive test confirmation (f);
8. Recovered cases (R).

Full details are shown in Figure 1.

All arrows represent transmission rate from one compartment to the other, such as from Is to T denoted as Is-T rate.

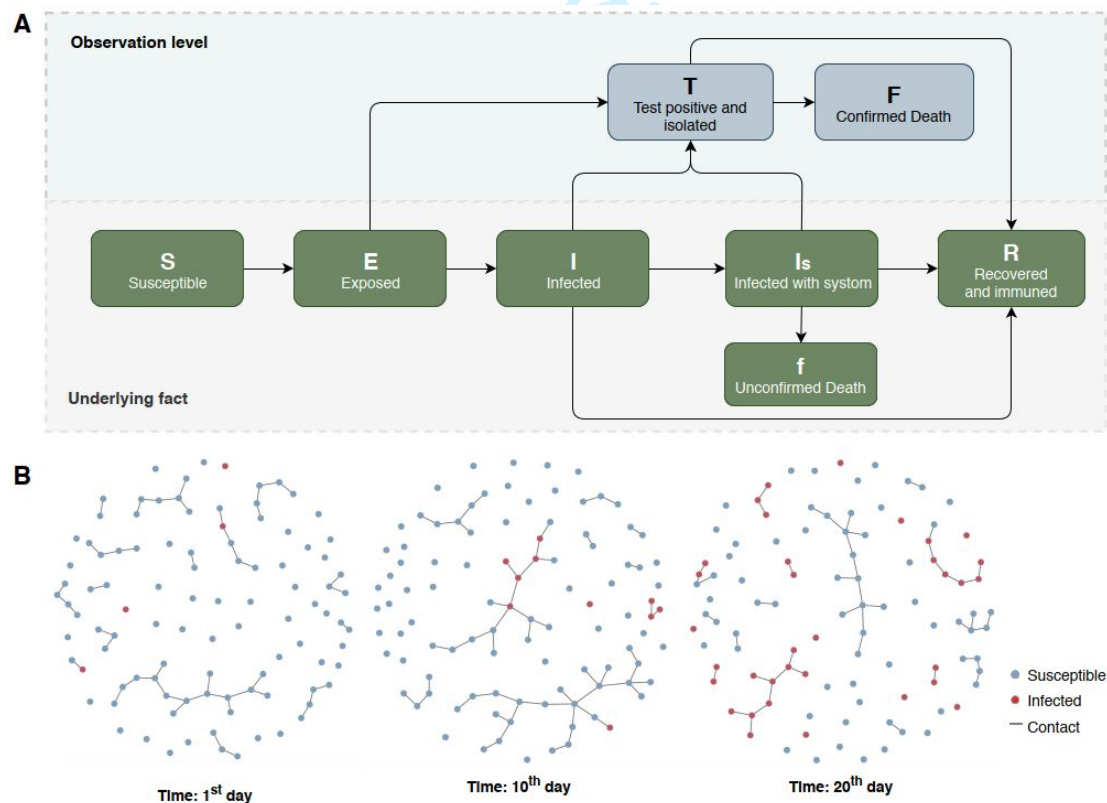

1  
2  
3 **Figure 1. Introduction of the CoTECT model.** (A) Structure of the network-based  
4 epidemiological model CoTECT. (B) Abbreviated version of the infection network progression.  
5 Snapshots shown are days 0, 10 and 20 after the first infected individual. Red and blue dots  
6 represent infected and susceptible individuals, respectively. Strings represent contact  
7 relationships.  
8  
9

### 10 11 12 **Parameter settings**

13 We parameterized the model using published values from multiple references <sup>24,25,26,27,28</sup>, most  
14 of which were cases-level data statistics <sup>4,29,30,31</sup>. The parameters including incubation period <sup>32</sup>  
15 <sup>3</sup>, average time from onset to severe case <sup>26</sup>, and average recovery times <sup>30</sup> for mild or severe  
16 cases are shown in Table S1. Sampled parameters were set at different grades within different  
17 scenarios, while fixed parameters remained constant across all experiments. A hypothetical  
18 population of 3,000 people over 300 days was used. The basic reproductive number (R0) of the  
19 baseline model was 2.2 by adjusting the edge density, maximum connection number and  
20 probability of transmission between connected nodes. Testing and tracing efficiencies were  
21 defined as an average of each individual's waiting interval from exposed/infected/symptom  
22 onset to test confirmation and quarantine. Efficiency is translated as transmission rate in  
23 CoTECT (IsT rate, IT rate, ET rate is the reciprocal of the waiting interval). For example, an  
24 average 7-day waiting time from symptom onset to quarantine is corresponding to 1/7  
25 transmission rate.  
26  
27  
28  
29  
30

31  
32 In all experiment setting, the efficiency parameters (IsT rate, IT rate, ET rate) are set  
33 correspondingly. The time interval from E to I was six days, based on average of 6.4 days <sup>3,6,25,28</sup>  
34 from exposure to infection (incubation period). Therefore, the denominator of the IT rate is  
35 usually six days more than that of ET rate. The same logic applied to the IsT rate. Nevertheless,  
36 efficient contact tracing will boost both IT and ET rates.  
37  
38

### 39 **Experiment setting**

40  
41 Baseline model is set as worst condition with no testing and contact tracing, therefore no  
42 quarantine measurements conducted. as mentioned above, with R0 is set over 1, the majority  
43 of the population will eventually get infected. on top of it, we simulated different combination  
44 of interventions as preliminary experiments to compare with the baseline. 1) four weeks  
45 delayed reaction (with no testing and contact tracing before the fourth week). And test only  
46 open to symptomatic cases; 2) four weeks delayed reaction with test for symptomatic, pre- and  
47 asymptomatic cases; 3) two weeks delayed reaction with test for symptomatic, pre- and  
48 asymptomatic cases.  
49  
50

51  
52 We designed three scenarios to investigate the significance of testing efficiency. There was  
53 only one changing condition with other variables consistent across each scenario. The average  
54 of the 20 experiments was used as the final result. The key outcome indicators include  
55 cumulative infection, peak daily infections, peak daily confirmation and quarantine, cumulative  
56 confirmed cases and deaths, and CFR.  
57  
58  
59  
60



1  
2  
3 1) Scenario-1 simulated five different test efficiency levels, represented by five scales of daily  
4 transmission rates from Is to T (IsT rate) as 1/4, 1/6, 1/8, 1/10, 1/12. The daily transmission rate  
5 from I to T (IT rate) and from E to T (ET rate) changed along with IsT rate.  
6  
7

8 2) Scenario-2 quantified the importance of efficient contact tracing. Due to asymptomatic  
9 transmissibility, contact tracing is critical for effective containment. Tracing efficiency is  
10 represented by either the IT or ET rate. Therefore, we designed the simulations with fixed IsT  
11 rate (1/7) and different IT (1/12, 1/19, 0) or ET(1/117, 1/24, 0) rates.  
12  
13

14 3) Scenario-3 was designed based on analyses of real-world data showing that response times  
15 have varied greatly worldwide. Many countries were not well prepared for the pandemic, and  
16 targeted testing and contact tracing measures were often not implemented until after many  
17 confirmed case fatalities. We therefore simulated different public health responses delays in  
18 CoTECT. Five experiments were conducted with fixed IsT, IT and ET rates. The delays applied  
19 were 10, 20, 30, 40 and 50 days. Before the responses, we set the transmission rate from E,I  
20 and Is compartments to T as 0.  
21  
22  
23

### 24 25 **Sensitivity analysis**

26 We evaluated transmission progression under conditions with no testing or contact tracing in  
27 place for varying population sizes. For all experiments, the mean basic reproduction number  
28 was set as an average of 2.2. Network density and relationship duration between nodes were  
29 consistent across all experiments.  
30  
31

### 32 33 **Patient and Public Involvement**

34 Patients and the public were not involved in this study.  
35  
36

### 37 38 **Results**

39 We carried out preliminary experiments to show how the CoTECT model simulates the  
40 transmission under different conditions of testing and contact tracing, and then demonstrated  
41 in detail the impacts of overall testing and contact tracing efficiency, contact tracing efficiency  
42 for pre- and asymptomatic cases, and delayed implementation of efficient testing and contact  
43 tracing on disease transmission.  
44  
45  
46

### 47 48 **Preliminary results of CoTECT simulation**

49 We first defined the baseline model as the worst-case scenario with no epidemiological  
50 interventions conducted in a closed population. The baseline R0 was 2.2, according to the  
51 average R0 estimated<sup>33</sup> from 177 countries and territories<sup>34</sup>. (Figure 2A), aligned with  
52 previously published studies<sup>26</sup>. Then we compared the baseline model with different  
53 combinations of testing and contact tracing interventions to evaluate their respective impact on  
54 disease transmission. The infection curve is shown in Figure 2B. We assumed each community  
55 responded a minimum of several weeks after first infection. The dark blue line shows the  
56 outcome for a delay of four weeks and testing only symptomatic cases. Total infections, peak  
57  
58  
59  
60

daily infections and total deaths were reduced by 13.2%, 43.7% and 27.3%, respectively, compared to baseline. The navy line shows the outcome for an open test policy with efficient contact tracing. Total infections, peak daily infections and total deaths decreased by 23.4%, 43.1% and 41.3%, respectively, compared to baseline. The light blue line shows the outcome for a delay of two weeks after the first infection. Total infections, peak daily infections and total deaths decreased by 44.1%, 75.8% and 61.0%, respectively, compared to baseline.

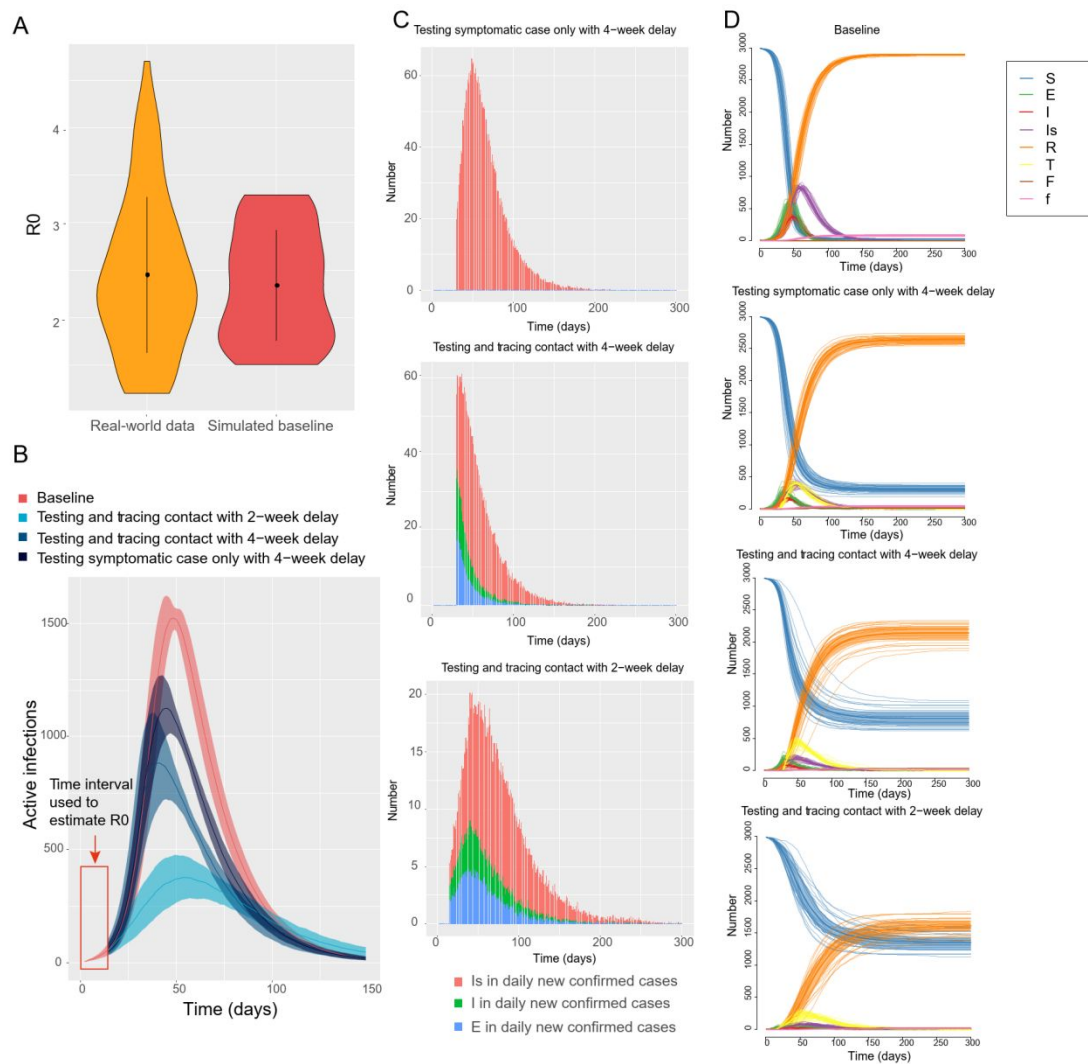

**Figure 2. Epidemic transmission for the baseline and intervention models. (A)** Violin plots of  $R_0$  distributions for the real-world data and baseline model. **(B)** Infection curves for the baseline and different intervention models. **(C)** Daily new symptomatic, pre- and asymptomatic cases confirmed by testing. **(D)** Compartment trends for the different models.

Daily new symptomatic, pre- and asymptomatic cases confirmed by testing in three conditions are shown in Figure 2C. Compared with condition-1 (only testing symptomatic cases with 4-week delay), condition-2 (testing and tracing pre- and asymptomatic contacts with 4-week delay) could reduce 24.8% of total confirmed cases (from 125 to 94), and 26.5% of 94

1  
2  
3 confirmed cases were diagnosed before symptom onset (E+I). Condition-3 (testing and tracing  
4 contacts with 2-week delay) could reduce 51.2% of total confirmed cases (from 125 to 61),  
5 33.6% of 61 confirmed cases were diagnosed before symptom onset (E+I). Moreover,  
6 compared to condition-2, Condition-3 also reduced daily peak confirmed Is, I, and E cases by  
7 65.8% (from 38 to 13), 75.0% (from 16 to 4), and 75.0% (from 20 to 5), respectively. We  
8 further demonstrated trends of all compartments in baseline and different conditions (Figure  
9 2D). Compared to baseline, as infections decreased in 3 conditions, the S individuals (those  
10 remain uninfected) of condition-1, -2, -3 were 6.6, 11.6, and 20.7 times of S individuals of  
11 baseline model after 300 days of the epidemic, respectively. Meanwhile, 27.7%, 41.5%, and  
12 61.2 % of deaths (confirmed and unconfirmed by testing) of baseline model were saved in  
13 condition-1, -2, -3, respectively. These results indicate that reduced time to action and better  
14 identification of pre- and asymptomatic cases are critical factors in flattening the infection curve  
15 and decreasing the deaths.  
16  
17  
18  
19  
20

### 21 **Impacts of overall testing and contact tracing efficiency to all infectors**

22  
23  
24 Three scenarios were designed to quantify the impacts of different testing interventions on  
25 transmission. The outcome indicators included final cumulative infections (R+F+f), peak daily  
26 infections (E+I+Is), peak daily test-positive cases with quarantine (T), cumulative test positive  
27 (T) cases, total fatalities and CFR.  
28  
29

30  
31 Scenario-1 evaluated the impact of overall testing and contact tracing efficiency by simulating  
32 five different levels of test efficiency, represented by five scales of daily transmission rate or  
33 average IsT rate. The intervals from symptom onset to positive test with quarantine were 4, 6,  
34 8, 10 and 12 days. The corresponding IsT rates were 1/4, 1/6, 1/8, 1/10 and 1/12, thus reflecting  
35 different testing efficiencies. This scenario assumes that contact tracing efficiency changed  
36 with the IsT rate, and therefore latent, asymptomatic cases could also be tested. We found that  
37 longer public health response delays (i.e., lower IsT rates) resulted in higher peak daily new  
38 transmitters, peak daily new diagnoses and overall cumulative infections. In addition, the  
39 number of diagnosed and undiagnosed fatalities and the proportion of undiagnosed fatalities  
40 increased as IsT rates declined, indicating that fewer tests and slower response times resulted  
41 in worse the epidemic outcomes. We decreased the IsT delay from 12 to 4 days in two days  
42 intervals and found that, compared to baseline, total infections decreased by 20.5%, 29.2%,  
43 39.0%, 57.0% and 88.3%, respectively, and total deaths decreased by 36.0%, 46.7%, 52.2%,  
44 70.6% and 92.8%, respectively. Peak daily infections across the five experiments increased  
45 linearly as IsT rates decreased (Table 1, Figure 3A).  
46  
47  
48  
49  
50  
51  
52  
53  
54  
55  
56  
57  
58  
59  
60

**Table 1: Baseline and Scenario-1, -2 and -3 model outcomes**

|             | Delay (days) to targeted testing and contact tracing (T delay) | Average waiting interval (days) from Is to T (1/IsT rate) | Average waiting interval (days) to from I to T (1/IT rate) | Total infections | Peak daily infections | Peak daily test confirmation | Total deaths | Proportion of unconfirmed deaths in total deaths |
|-------------|----------------------------------------------------------------|-----------------------------------------------------------|------------------------------------------------------------|------------------|-----------------------|------------------------------|--------------|--------------------------------------------------|
| Baseline    | No testing                                                     | No IsT transformation                                     | No IT transformation                                       | 2933.6           | 1553.2                | 0                            | 78.1         | 100%                                             |
| Scenario -1 | 0                                                              | 4                                                         | Yes                                                        | 344.3            | 48.7                  | 38.1                         | 5.6          | 36%                                              |
|             |                                                                | 6                                                         |                                                            | 1261.4           | 181.8                 | 128.3                        | 23           | 39%                                              |
|             |                                                                | 8                                                         |                                                            | 1789             | 328.5                 | 208.9                        | 37.3         | 49%                                              |
|             |                                                                | 10                                                        |                                                            | 2077.3           | 425                   | 251.8                        | 41.6         | 54%                                              |
|             |                                                                | 12                                                        |                                                            | 2330.8           | 581                   | 318.3                        | 50           | 56%                                              |
| Scenario -2 | 0                                                              | 7                                                         | No IT transformation                                       | 2510.9           | 800.4                 | 315                          | 57.2         | 67%                                              |
|             |                                                                | 13                                                        |                                                            | 1941.2           | 396.6                 | 213                          | 38.1         | 51%                                              |
|             |                                                                | 11                                                        |                                                            | 1614.6           | 285.5                 | 168.9                        | 30.8         | 45%                                              |
| Scenario -3 | 10                                                             | 7                                                         | Yes                                                        | 1857.6           | 360.1                 | 233.4                        | 37.2         | 46%                                              |
|             |                                                                | 20                                                        |                                                            | 1922.6           | 456.2                 | 294.4                        | 37.8         | 49%                                              |
|             |                                                                | 30                                                        |                                                            | 2272.3           | 764.1                 | 455.5                        | 45.2         | 55%                                              |
|             |                                                                | 40                                                        |                                                            | 2649.8           | 1129.5                | 543                          | 58.6         | 71%                                              |
|             |                                                                | 50                                                        |                                                            | 2866.7           | 1231.6                | 400.5                        | 67.1         | 82%                                              |

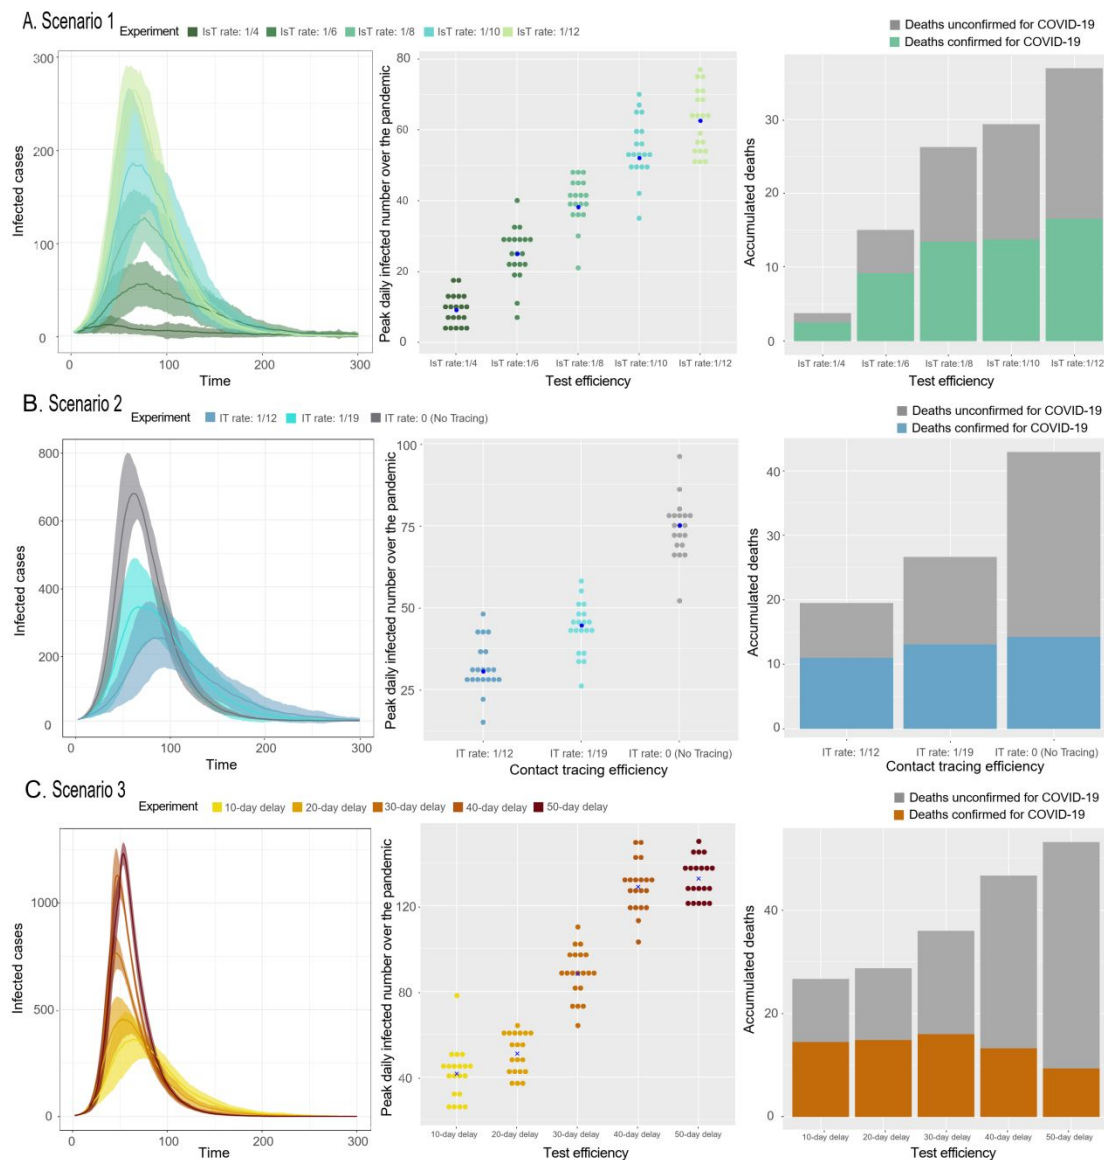

**Figure 3: Scenario-1, Two and Three outcomes.** Total infections over time, peak daily infections for different public health response strategies (each dot represents a simulation) and accumulated deaths (both confirmed and unconfirmed cases) for (A) Scenario-1, (B) Scenario-2 and (C) Scenario-3.

### Impacts of contact tracing efficiency for pre- and asymptomatic cases

Scenario-2 evaluated the impact of tracing efficiency for pre- and asymptomatic cases by simulating different IT and ET rates with a fixed IsT rate. Contact tracing for Covid-19 is critical due to the transmissibility of pre- and asymptomatic infections. The IT and ET rates reflect contract tracing efficiency. In this scenario, the probability that latent and asymptomatic (or mild) cases would be tested and isolated (ET and IT rate) was adjusted by 0, 1/13 and 1/11. The fixed IsT rate was 1/7, which assumed 7 days waiting interval from onset to quarantine. The results showed that larger ET and IT rates resulted in fewer overall infections, confirmed cases and confirmed and unconfirmed fatalities. More efficient contact tracing (12-day delay

1  
2  
3 from infected to testing for I cases) would prevent 36% of cumulative infections, 64% of peak  
4 daily infections, 46% of peak daily confirmed cases and 46% of total deaths compared to no  
5 contact tracing. Less efficient contact tracing (as a 19-day delay from infected to testing for I  
6 cases) only prevented 23% of cumulative infections, 50% of peak daily infections, 32% of peak  
7 daily confirmed cases and 33% of total fatalities compared to no contact tracing. Thus, more  
8 efficient contact tracing resulted in overall fewer infections (Table 1, Figure 3B).  
9

### 12 **Impacts of delayed implementation of efficient testing and contact tracing**

13  
14  
15 Scenario-3 evaluated the impact of delayed implementation of efficient testing and contact  
16 tracing. The delay intervals between the first infection and implementation of targeted testing  
17 were set as 10, 20, 30, 40 and 50 days. We found that cumulative infections and fatalities  
18 increased with increasing delay intervals. Compared to 50-day delay, delays of 10, 20, 30 and  
19 40 days reduced total infections by 35.2%, 32.9%, 20.7% and 7.6%, respectively, and total  
20 deaths by 44.6%, 43.7%, 32.6% and 12.7%, respectively. The increase in peak daily  
21 transmitters as delay interval increased followed a sigmoid-shape curve (Table 1, Figure 3C).  
22 Clearly, implementation of a prompt testing response within 20 days of first infection had much  
23 more impact than after 20 days.  
24  
25  
26  
27

28 The important impacts of prompt reaction for testing are not only presented in our simulation,  
29 but also observed in real-world data. The measures for sufficiency testing were the number of  
30 tests conducted per confirmed case (TPC) and tests per million people (TPM). Here, efficiency  
31 is measured as the time interval between infection and positive Covid19 test, and sufficient  
32 testing capacity, estimated by TPC and TPM, is therefore a prerequisite for efficiency.  
33 Decreasing TPC trends indicate that disease transmission is outpacing testing and efficiency is  
34 decreasing. The three indicators of epidemic control were CFR, confirmed cases per million  
35 people (CPM) and deaths per million people (DPM).  
36  
37  
38  
39

40 We selected four Nordic countries with similar medical resources, population aging level,  
41 geography and climate for comparison (Figure 4). Day 0 was the day when daily DPM reached  
42 0.1. Norway, Finland and Denmark experienced similar proportion of lockdown duration in  
43 first 70 days, and TPC trends over the first 70 days all increased. From Day 0 to 14, TPC was  
44 highest in Norway, followed by Finland and Denmark. Between Day 15 and 70, even though  
45 the TPCs in Norway and Finland were similar, the CFR in Norway (2.8%) was lower than in  
46 Finland (4.6%). This implies that the early-outbreak TPC values are a bigger factor than later  
47 TPC in controlling the epidemic. Denmark had the lowest early-outbreak TPC of the above  
48 three countries. Even though its TPC later grew dramatically and far exceeded those of Norway  
49 and Finland, its CFR (4.9%) was higher than either Norway or Finland. We also observed that  
50 overall TPM in Denmark from Days 0 and 70 was 2.7 times those of Norway and Finland. This  
51 implies that early-stage TPC may have a greater influence on the overall CFR than late-stage  
52 TPC, in consistent with our hypothesis that early testing plays a critical role, without which,  
53 testing efforts must be heavily increased as transmission rates worsen. In Sweden, TPC  
54 gradually decreased. Sweden's CFR (12%) was the highest of all four countries. This indicates  
55  
56  
57  
58  
59  
60

that failure to implement early-stage sufficient targeted testing may not be remedied by increasing testing in the later period.

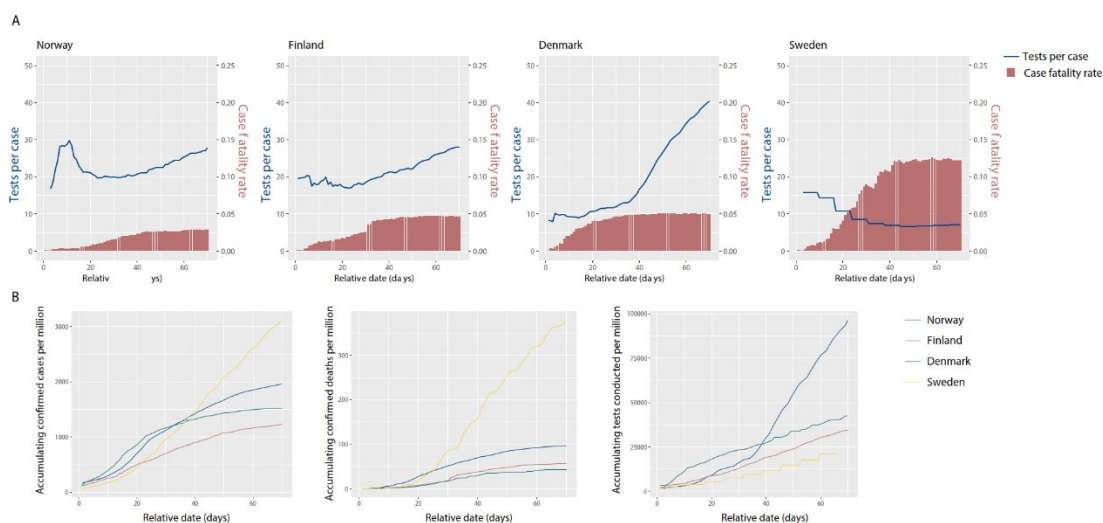

**Figure 4: CFR, CPM and DPM trends in representative countries with different TPC and TPM levels.**

(A) Accumulating CFR by COVID-19 and the TPC for 4 countries, starting by the day since daily new deaths due to COVID-19 reached 0.1 per million. (B) Accumulating cases, deaths, and tests per million of COVID-19 of 4 countries.

### Sensitivity Analysis

Using sensitivity analyses, we compared baseline models with population sizes of 1000, 2000, 3000, 4000 and 5000. The proportions of cumulative infections, peak daily infections and cumulative deaths were similar across all five models. However, variation was much greater between the 1000 and 2000 population models than between population models of 3000 or more. These findings were our rationale for using a representative population model of 3000 (Figure S1, Table S2).

### Discussion

Our model quantifies how testing and contact tracing efficiency can influence the transmission and indicates that early, efficient testing and contact tracing can reduce disease transmission and mitigate overall fatalities. We believe it is critical to consider the transmission rates from pre- and asymptomatic cases in simulation models, which is the daily probability for an infected person to become confirmed and quarantined. Public health leaders should implement testing and contact tracing as soon as possible after cases are identified to minimize transmission rates over the course of an outbreak. It is reported that testing, tracing and targeted quarantine are more economical approaches in the long term<sup>35</sup>.

1  
2  
3 The mean waiting time from receive COVID-19 test to confirmation is 4.1 days in the United  
4 States, which is reported to be disadvantageous to epidemic control<sup>36</sup>. According to Scenario-  
5 1, 4-day extra waiting interval will cause tremendous difference in total infection and death.  
6 Another example of the value of efficient testing is the successful containment of the second  
7 outbreak wave in Beijing, China. Highly efficient testing(opened to all, with or without  
8 symptoms) and contact tracing began immediately after the first case was identified and disease  
9 transmission was effectively controlled within a month<sup>37,38,39,40</sup> (Table S3), in mark contrast to  
10 the first outbreak in Wuhan, for which testing was less efficient and containment was slower.  
11 Government leader should aim to both increase testing and shorten the time from testing to  
12 quarantine.  
13  
14  
15  
16

17  
18 Limitations of this work include that all simulations were conducted in a closed population and  
19 did not account for immigration or inter-community social activity. Network sizes were also  
20 limited by computing complexity. Confounders such as differences in population aging level,  
21 medical resources, and lockdown procedures could be considered in our model in the future  
22 work. we will continue to study the impact of testing and contact tracing efficiency with  
23 constraints and countermeasures.  
24  
25

### 26 **Contributorship statement**

27  
28 Y. Hu designed and directed the project; Y. Hu and J. Guo wrote the article; X. Li, G. Li,  
29 X. Lu, Y. Zhang, L. Cong, Y. Kang, and X. Jia aided in data analysis or writing framework.  
30 X. Li, X. Shi and G. Xie were supervising the study, L. Zhang were guiding and supervising  
31 the study.  
32  
33

### 34 **Declaration of interests**

35 We declare no competing interests.  
36  
37

### 38 **Data sharing**

39 Extra data is available by emailing moehu@foxmail.com.  
40  
41

### 42 **Acknowledgements**

43 We thank Kelly C. McMilan PhD for editing the English text of a draft of this  
44 manuscript.  
45  
46

### 47 **References**

- 48 1. Petrosillo N, Viceconte G, Ergonul O, Ippolito G, Petersen E. COVID-19, SARS and  
49 MERS: are they closely related? *Clin Microbiol Infect.* 2020;26(6):729-734.
- 50 2. Furukawa NW, Brooks JT, Sobel J. Evidence supporting transmission of severe acute  
51 respiratory syndrome coronavirus 2 while presymptomatic or asymptomatic.  
52 *Emerging infectious diseases.* 2020;26(7).
- 53 3. Backer JA, Klinkenberg D, Wallinga J. Incubation period of 2019 novel coronavirus  
54 (2019-nCoV) infections among travellers from Wuhan, China, 20-28 January 2020.  
55 LID - 10.2807/1560-7917.ES.2020.25.5.2000062 [doi] LID - 2000062. (1560-7917  
56 (Electronic)).  
57  
58  
59  
60



- 1
- 2
- 3
- 4 4. Yu P, Zhu J, Zhang Z, Han Y. A Familial Cluster of Infection Associated With the
- 5 2019 Novel Coronavirus Indicating Possible Person-to-Person Transmission During
- 6 the Incubation Period. *J Infect Dis*. 2020;221(11):1757-1761.
- 7
- 8 5. Lipsitch M, Cohen T, Cooper B, et al. Transmission Dynamics and Control of Severe
- 9 Acute Respiratory Syndrome. *Science*. 2003;300(5627):1966.
- 10
- 11 6. Jiang X, Rayner S, Luo MH. Does SARS-CoV-2 has a longer incubation period than
- 12 SARS and MERS? *Journal of medical virology*. 2020;92(5):476-478.
- 13
- 14 7. Pollán M, Pérez-Gómez B, Pastor-Barriuso R, et al. Prevalence of SARS-CoV-2 in
- 15 Spain (ENE-COVID): a nationwide, population-based seroepidemiological study.
- 16 *The Lancet*. 2020.
- 17
- 18 8. Kretzschmar ME, Rozhnova G, Bootsma MCJ, van Boven M, van de Wijgert JHHM,
- 19 Bonten MJM. Impact of delays on effectiveness of contact tracing strategies for
- 20 COVID-19: a modelling study. *The Lancet Public Health*. 2020;5(8):e452-e459.
- 21
- 22 9. Hellewell J, Abbott S, Gimma A, et al. Feasibility of controlling COVID-19
- 23 outbreaks by isolation of cases and contacts. *The Lancet Global Health*.
- 24 2020;8(4):e488-e496.
- 25
- 26 10. Peak CM, Kahn R, Grad YH, et al. Individual quarantine versus active monitoring of
- 27 contacts for the mitigation of COVID-19: a modelling study. *The Lancet Infectious*
- 28 *Diseases*. 2020;20(9):1025-1033.
- 29
- 30 11. Firth JA, Hellewell J, Klepac P, Kissler S, Kucharski AJ, Spurgin LG. Using a real-
- 31 world network to model localized COVID-19 control strategies. *Nature medicine*.
- 32 2020:1-7.
- 33
- 34 12. Bilinski A, Mostashari F, Salomon JA. Modeling Contact Tracing Strategies for
- 35 COVID-19 in the Context of Relaxed Physical Distancing Measures. *JAMA Network*
- 36 *Open*. 2020;3(8):e2019217-e2019217.
- 37
- 38 13. Leung K, Wu JT, Liu D, Leung GM. First-wave COVID-19 transmissibility and
- 39 severity in China outside Hubei after control measures, and second-wave scenario
- 40 planning: a modelling impact assessment. *The Lancet*. 2020;395(10233):1382-1393.
- 41
- 42 14. Flaxman S, Mishra S, Gandy A, et al. Estimating the effects of non-pharmaceutical
- 43 interventions on COVID-19 in Europe. *Nature*. 2020;584(7820):257-261.
- 44
- 45 15. Müller M, Derlet PM, Mudry C, Aeppli G. Testing of asymptomatic individuals for
- 46 fast feedback-control of COVID-19 pandemics. *Phys Biol*. 2020.
- 47
- 48 16. Li Q, Tang B, Bragazzi NL, Xiao Y, Wu J. Modeling the impact of mass influenza
- 49 vaccination and public health interventions on COVID-19 epidemics with limited
- 50 detection capability. *Math Biosci*. 2020;325:108378.
- 51
- 52 17. Panovska-Griffiths J, Kerr CC, Stuart RM, et al. Determining the optimal strategy for
- 53 reopening schools, the impact of test and trace interventions, and the risk of
- 54 occurrence of a second COVID-19 epidemic wave in the UK: a modelling study. *The*
- 55 *Lancet Child & Adolescent Health*. 2020.
- 56
- 57 18. Kucharski AJ, Klepac P, Conlan A, et al. Effectiveness of isolation, testing, contact
- 58 tracing and physical distancing on reducing transmission of SARS-CoV-2 in different
- 59 settings. *medRxiv*. 2020.
- 60
19. Jenness SM, Goodreau SM, Morris M. EpiModel: An R Package for Mathematical
- Modeling of Infectious Disease over Networks. *J Stat Softw*. 2018;84.

- 1
  - 2
  - 3
  - 4
  - 5
  - 6
  - 7
  - 8
  - 9
  - 10
  - 11
  - 12
  - 13
  - 14
  - 15
  - 16
  - 17
  - 18
  - 19
  - 20
  - 21
  - 22
  - 23
  - 24
  - 25
  - 26
  - 27
  - 28
  - 29
  - 30
  - 31
  - 32
  - 33
  - 34
  - 35
  - 36
  - 37
  - 38
  - 39
  - 40
  - 41
  - 42
  - 43
  - 44
  - 45
  - 46
  - 47
  - 48
  - 49
  - 50
  - 51
  - 52
  - 53
  - 54
  - 55
  - 56
  - 57
  - 58
  - 59
  - 60
20. van der Pol J. Introduction to Network Modeling Using Exponential Random Graph Models (ERGM): Theory and an Application Using R-Project. *Computational Economics*. 2019;54(3):845-875.
21. Danon L, Ford AP, House T, et al. Networks and the Epidemiology of Infectious Disease. *Interdisciplinary Perspectives on Infectious Diseases*. 2011;2011:284909.
22. Mossong J, Hens N, Jit M, et al. Social contacts and mixing patterns relevant to the spread of infectious diseases. *PLoS Med*. 2008;5(3):e74.
23. Ameri K, Cooper KD. A Network-Based Compartmental Model For The Spread Of Whooping Cough In Nebraska. *AMIA Jt Summits Transl Sci Proc*. 2019;2019:388-397.
24. Russell TW, Hellewell J, Jarvis CI, et al. Estimating the infection and case fatality ratio for coronavirus disease (COVID-19) using age-adjusted data from the outbreak on the Diamond Princess cruise ship, February 2020. LID - 10.2807/1560-7917.ES.2020.25.12.2000256 [doi] LID - 2000256. (1560-7917 (Electronic)).
25. Wang D, Hu B, Hu C, et al. Clinical Characteristics of 138 Hospitalized Patients With 2019 Novel Coronavirus–Infected Pneumonia in Wuhan, China. *JAMA*. 2020;323(11):1061-1069.
26. Organization WH. *Report of the WHO-China Joint Mission on Cononavirus Disease 2019(COVID-19)*. 16-24 February 2020.
27. Liu Y, Yan L-M, Wan L, et al. Viral dynamics in mild and severe cases of COVID-19. *The Lancet Infectious Diseases*. 2020;20(6):656-657.
28. Huang C, Wang Y, Li X, et al. Clinical features of patients infected with 2019 novel coronavirus in Wuhan, China. *The Lancet*. 2020;395(10223):497-506.
29. Chan JF-W, Yuan S, Kok K-H, et al. A familial cluster of pneumonia associated with the 2019 novel coronavirus indicating person-to-person transmission: a study of a family cluster. *The Lancet*. 2020;395(10223):514-523.
30. Bhatraju PK, Ghassemieh BJ, Nichols M, et al. Covid-19 in Critically Ill Patients in the Seattle Region — Case Series. *New England Journal of Medicine*. 2020;382(21):2012-2022.
31. Li Q, Guan X, Wu P, et al. Early Transmission Dynamics in Wuhan, China, of Novel Coronavirus-Infected Pneumonia. (1533-4406 (Electronic)).
32. Organization WH. *Coronavirus disease 2019 (COVID-19) Situation Report – 73*. World Health Organization; April 2 2020.
33. admin. Fitting the parameters of an SIR model to influenza data using Least Squares and the graphical Monte Carlo method. 2013; <http://sherrytowers.com/2013/01/29/neiu-lecture-vi-fitting-the-parameters-of-an-sir-model-to-influenza-data/>.
34. Max Roser HR, Esteban Ortiz-Ospina and Joe Hasell. ovidcoronavirus. *Our World in Data*. 2020.
35. Mehrotra K. Testing needed for ‘unlock’ would cost 2% of lockdown economic losses, says study, encourages antibody tests. 2020; <https://www.msn.com/en-in/money/markets/testing-needed-for-unlock-would-cost-2percent-of-lockdown-economic-losses-says-study-encourages-antibody-tests/ar-BB14ZsVS?li=AAgfW3S>.

- 1  
2  
3  
4  
5  
6  
7  
8  
9  
10  
11  
12  
13  
14  
15  
16  
17  
18  
19
36. David Lazer MAB, Katherine Ognyanova, John Della Volpe. *The State of the nation: A 50-state COVID-19 survey*. 2020. April 30th.
  37. Guo Z. Beijing have tested over 2.948 million people. [News]. 2020; [http://news.china.com.cn/txt/2020-06/23/content\\_76195219.htm](http://news.china.com.cn/txt/2020-06/23/content_76195219.htm).
  38. Ziqi W. All Negative! Xinfadi market has completed 5803 swabs for testing results. <https://baijiahao.baidu.com/s?id=1669485198569240379&wfr=spider&for=pc>, 2020-06-14.
  39. Junlu W. Beijing opened extensive nucleic acid testing among key population groups and those who volunteer to get tested. 2020; [http://www.xinhuanet.com/2020-04/20/c\\_1125877832.htm](http://www.xinhuanet.com/2020-04/20/c_1125877832.htm). Accessed 2020-06-19.
  40. China NHCotPsRo. Daily Report of COVID-19 2020; [http://www.nhc.gov.cn/xcs/xxgzbd/gzbd\\_index.shtml](http://www.nhc.gov.cn/xcs/xxgzbd/gzbd_index.shtml).

#### Licence statement

20  
21  
22  
23  
24  
25  
26  
27  
28  
29  
30  
31  
32  
33

I, the Submitting Author has the right to grant and does grant on behalf of all authors of the Work (as defined in the below author licence), an exclusive licence and/or a non-exclusive licence for contributions from authors who are: i) UK Crown employees; ii) where BMJ has agreed a CC-BY licence shall apply, and/or iii) in accordance with the terms applicable for US Federal Government officers or employees acting as part of their official duties; on a worldwide, perpetual, irrevocable, royalty-free basis to BMJ Publishing Group Ltd ("BMJ") its licensees and where the relevant Journal is co-owned by BMJ to the co-owners of the Journal, to publish the Work in BMJ Open and any other BMJ products and to exploit all rights, as set out in our [licence](#).

34  
35  
36  
37  
38  
39  
40  
41  
42  
43  
44  
45  
46  
47  
48  
49  
50  
51  
52  
53  
54  
55  
56  
57  
58  
59  
60

The Submitting Author accepts and understands that any supply made under these terms is made by BMJ to the Submitting Author unless you are acting as an employee on behalf of your employer or a postgraduate student of an affiliated institution which is paying any applicable article publishing charge ("APC") for Open Access articles. Where the Submitting Author wishes to make the Work available on an Open Access basis (and intends to pay the relevant APC), the terms of reuse of such Open Access shall be governed by a Creative Commons licence – details of these licences and which [Creative Commons](#) licence will apply to this Work are set out in our licence referred to above.

## Supplemental materials

Table S1. Parameter setting for CoTECT

|         | Transmission route | Parameter definition                                                                                | Assumed rate                   | References |
|---------|--------------------|-----------------------------------------------------------------------------------------------------|--------------------------------|------------|
| Sampled | E-->T              | Rate per day at which exposed (E) individuals test positive and enter quarantine status (T)         | 1/18<br>(1/15-1/23)            | 1 2 3      |
|         | I-->T              | Rate per day at which infected (I) cases test positive and enter quarantine status (T)              | 1/12<br>(1/9-1/17)             | 1 2 3      |
|         | Is-->T             | Rate per day at which symptomatic infected (Is) cases test positive and enter quarantine status (T) | 1/7<br>(1/4,1/6,1/8,1/10,1/12) | 1          |
| Fixed   | I-->Is             | Rate per day at which infected (I) cases become symptomatic (Is) cases                              | 1/5                            | 1          |
| Fixed   | E-->I              | Rate per day at which an exposed (E) individual become infected (I) cases                           | 1/6.4                          | 4          |
|         | I-->R              | Rate per day at which infected cases with mild or no symptoms (I) recover and are immunized (R)     | 1/14                           | 1 2        |
|         | Is-->R             | Rate per day at which infected cases with severe symptoms (Is) recover and are immunized (R)        | 1/21                           | 1 5        |
|         | T-->R              | Rate per day at which quarantined, test-positive (T) cases recover and are immunized (R)            | 1/17                           | Assumed    |
|         | Is-->F             | Death rate per day of infected cases with severe symptoms (Is)                                      | 0.002                          | 2          |
|         | T-->F              | Death rate per day of test-positive (T) cases                                                       | 0.001                          | 2 3 6 7    |

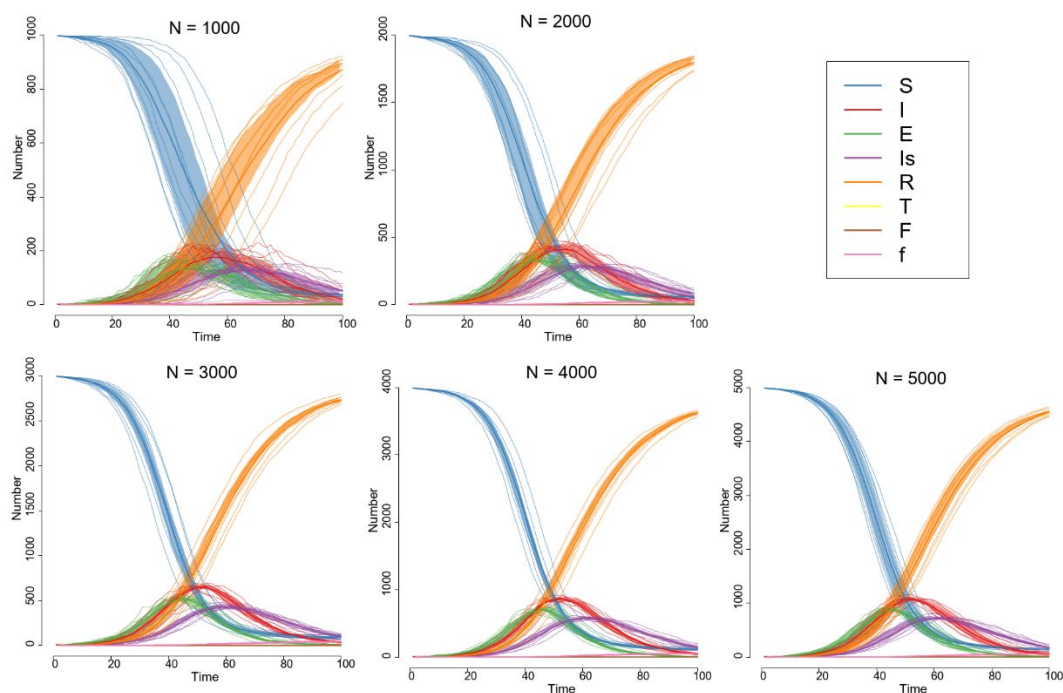

**Figure S1: Sensitivity analyses for baseline models of different population sizes (N=1000, 2000, 3000, 4000, and 5000).** Curves for each compartment in each model are shown in five graphs and demonstrate similar proportions of people in each compartment in the whole population.

**Table S2: Sensitivity analyses for baseline models of different population sizes**

| Population size | Total infections | Peak daily infections | Proportion of total infections in population whole | Cumulative deaths of unconfirmed cases |
|-----------------|------------------|-----------------------|----------------------------------------------------|----------------------------------------|
| 1000            | 883.2            | 290.9                 | 88.3%                                              | 12.1                                   |
| 2000            | 1826.2           | 668.5                 | 91.3%                                              | 27.4                                   |
| 3000            | 2769.8           | 1035                  | 92.3%                                              | 39.3                                   |
| 4000            | 3676             | 1378.4                | 91.9%                                              | 52.7                                   |
| 5000            | 4606.9           | 1716.8                | 92.1%                                              | 60.8                                   |

**Table S3. Testing efficiency for the second-wave outbreak in Beijing, China**

| Average time from onset to reporting (first 37 cases) | Percentage of cases confirmed by contact tracing (first 37 cases) | Tests for traced contacts (first ten days) | Daily testing capacity within one month | Test efficiency for cases with fever | Test efficiency for other patients | Test efficiency for other patients | Test efficiency for normal test application | Total confirmed cases | Percentage of cases confirmed by targeted screening tests |
|-------------------------------------------------------|-------------------------------------------------------------------|--------------------------------------------|-----------------------------------------|--------------------------------------|------------------------------------|------------------------------------|---------------------------------------------|-----------------------|-----------------------------------------------------------|
| 2.7 days                                              | 68%                                                               | 2342 thousand                              | 90 to 100 thousand                      | 6h                                   | 12h                                | 6h                                 | 24h                                         | 335                   | 52%                                                       |

## References

1. Organization WH. Report of the WHO-China Joint Mission on Coronavirus Disease 2019(COVID-19), 2020.
2. Wang D, Hu B, Hu C, et al. Clinical Characteristics of 138 Hospitalized Patients With 2019 Novel Coronavirus-Infected Pneumonia in Wuhan, China. *JAMA* 2020; **323**(11): 1061-9.
3. Huang C, Wang Y, Li X, et al. Clinical features of patients infected with 2019 novel coronavirus in Wuhan, China. *The Lancet* 2020; **395**(10223): 497-506.
4. Backer JA, Klinkenberg D, Wallinga J. Incubation period of 2019 novel coronavirus (2019-nCoV) infections among travellers from Wuhan, China, 20-28 January 2020. LID - 10.2807/1560-7917.ES.2020.25.5.2000062 [doi] LID - 2000062. (1560-7917 (Electronic)).
5. Liu Y, Yan L-M, Wan L, et al. Viral dynamics in mild and severe cases of COVID-19. *The Lancet Infectious Diseases* 2020; **20**(6): 656-7.

1  
2  
3  
4 6. Li Q, Guan X, Wu P, et al. Early Transmission Dynamics in Wuhan, China,  
5  
6 of Novel Coronavirus-Infected Pneumonia. (1533-4406 (Electronic)).  
7

8  
9 7. Russell TW, Hellewell J, Jarvis CI, et al. Estimating the infection and case  
10  
11 fatality ratio for coronavirus disease (COVID-19) using age-adjusted data from  
12  
13 the outbreak on the Diamond Princess cruise ship, February 2020. LID -  
14  
15 10.2807/1560-7917.ES.2020.25.12.2000256 [doi] LID - 2000256. (1560-7917  
16  
17 (Electronic)).  
18  
19  
20  
21  
22  
23  
24  
25  
26  
27  
28  
29  
30  
31  
32  
33  
34  
35  
36  
37  
38  
39  
40  
41  
42  
43  
44  
45  
46  
47  
48  
49  
50  
51  
52  
53  
54  
55  
56  
57  
58  
59  
60

# BMJ Open

## The role of efficient testing and contact tracing in mitigating COVID-19 pandemic: A network modeling study

|                                 |                                                                                                                                                                                                                                                                                                                                                                                                                                                                                                                                                                                                                                                                                                                                                                                                                                                                                                                                                                                                                |
|---------------------------------|----------------------------------------------------------------------------------------------------------------------------------------------------------------------------------------------------------------------------------------------------------------------------------------------------------------------------------------------------------------------------------------------------------------------------------------------------------------------------------------------------------------------------------------------------------------------------------------------------------------------------------------------------------------------------------------------------------------------------------------------------------------------------------------------------------------------------------------------------------------------------------------------------------------------------------------------------------------------------------------------------------------|
| Journal:                        | <i>BMJ Open</i>                                                                                                                                                                                                                                                                                                                                                                                                                                                                                                                                                                                                                                                                                                                                                                                                                                                                                                                                                                                                |
| Manuscript ID                   | bmjopen-2020-045886.R1                                                                                                                                                                                                                                                                                                                                                                                                                                                                                                                                                                                                                                                                                                                                                                                                                                                                                                                                                                                         |
| Article Type:                   | Original research                                                                                                                                                                                                                                                                                                                                                                                                                                                                                                                                                                                                                                                                                                                                                                                                                                                                                                                                                                                              |
| Date Submitted by the Author:   | 15-Feb-2021                                                                                                                                                                                                                                                                                                                                                                                                                                                                                                                                                                                                                                                                                                                                                                                                                                                                                                                                                                                                    |
| Complete List of Authors:       | Hu, Yiyi; Ping An Healthcare Technology<br>Guo, Jianying; Ping An Healthcare Technology<br>Li, Guanqiao; Tsinghua University School of Medicine and Vanke School of Public Health; Tsinghua Clinical Research Institute (TCRI) , School of Medicine, Tsinghua University<br>Lu, Xi; Tsinghua University School of Medicine and Vanke School of Public Health<br>Li, Xiang; Ping An Healthcare Technology<br>Zhang, Yuan; Ping An Healthcare Technology<br>Cong, Lin; Ping An Healthcare Technology<br>Kang, Yanni; Ping An Healthcare Technology<br>Jia, Xiaoyu; Ping An Healthcare Technology<br>Shi, Xuanling; Tsinghua University School of Medicine and Vanke School of Public Health<br>Xie, Guotong; Ping An Technology, Ping An Healthcare Technology ; Ping An Insurance Group Company of China Ltd, Ping An Health Cloud Company Limited, Ping An International Smart City Technology Co., Ltd<br>Zhang, Linqi; Tsinghua University, School of Medicine and Vanke School of Public Health Beijing, CN |
| <b>Primary Subject Heading</b>: | Public health                                                                                                                                                                                                                                                                                                                                                                                                                                                                                                                                                                                                                                                                                                                                                                                                                                                                                                                                                                                                  |
| Secondary Subject Heading:      | Public health, Infectious diseases, Epidemiology                                                                                                                                                                                                                                                                                                                                                                                                                                                                                                                                                                                                                                                                                                                                                                                                                                                                                                                                                               |
| Keywords:                       | Public health < INFECTIOUS DISEASES, PUBLIC HEALTH, EPIDEMIOLOGY, COVID-19                                                                                                                                                                                                                                                                                                                                                                                                                                                                                                                                                                                                                                                                                                                                                                                                                                                                                                                                     |
|                                 |                                                                                                                                                                                                                                                                                                                                                                                                                                                                                                                                                                                                                                                                                                                                                                                                                                                                                                                                                                                                                |

SCHOLARONE™  
Manuscripts





I, the Submitting Author has the right to grant and does grant on behalf of all authors of the Work (as defined in the below author licence), an exclusive licence and/or a non-exclusive licence for contributions from authors who are: i) UK Crown employees; ii) where BMJ has agreed a CC-BY licence shall apply, and/or iii) in accordance with the terms applicable for US Federal Government officers or employees acting as part of their official duties; on a worldwide, perpetual, irrevocable, royalty-free basis to BMJ Publishing Group Ltd ("BMJ") its licensees and where the relevant Journal is co-owned by BMJ to the co-owners of the Journal, to publish the Work in this journal and any other BMJ products and to exploit all rights, as set out in our [licence](#).

The Submitting Author accepts and understands that any supply made under these terms is made by BMJ to the Submitting Author unless you are acting as an employee on behalf of your employer or a postgraduate student of an affiliated institution which is paying any applicable article publishing charge ("APC") for Open Access articles. Where the Submitting Author wishes to make the Work available on an Open Access basis (and intends to pay the relevant APC), the terms of reuse of such Open Access shall be governed by a Creative Commons licence – details of these licences and which [Creative Commons](#) licence will apply to this Work are set out in our licence referred to above.

Other than as permitted in any relevant BMJ Author's Self Archiving Policies, I confirm this Work has not been accepted for publication elsewhere, is not being considered for publication elsewhere and does not duplicate material already published. I confirm all authors consent to publication of this Work and authorise the granting of this licence.

# The role of efficient testing and contact tracing in mitigating COVID-19 pandemic: A network modeling study

**Yiying Hu, MS <sup>a</sup>, Jianying Guo, PhD <sup>a</sup>, Guanqiao Li, PhD <sup>d e</sup>, Xi Lu, PhD <sup>e</sup>, Xiang Li, PhD <sup>a</sup>, Yuan Zhang, MS <sup>a</sup>, Lin Cong, MS <sup>a</sup>, Yanni Kang, MS <sup>a</sup>, Xiaoyu Jia, BA <sup>a</sup>, Xuanling Shi, PhD <sup>e</sup>, Guotong Xie, PhD <sup>a b c+</sup>, Linqi Zhang, PhD <sup>e+</sup>**

<sup>a</sup>Ping An Healthcare Technology

<sup>b</sup>Ping An Health Cloud Company Limited

<sup>c</sup>Ping An International Smart City Technology Co., Ltd.

<sup>d</sup>Tsinghua Clinical Research Institute ( TCRI ), School of Medicine, Tsinghua University, Beijing, China

<sup>e</sup>School of Medicine and Vanke School of Public Health, Tsinghua University, Beijing, China

+ Linqi Zhang and Guotong Xie share joint correspondence in this work:

Prof Linqi Zhang, School of Medicine and Vanke School of Public Health, Tsinghua

University, Beijing, China

zhanglinqi@tsinghua.edu.cn

and

Dr. Guotong Xie, Ping An Technology, Ping An Healthcare Technology; Ping An Insurance Group Company of China Ltd, Ping An Health Cloud Company Limited, Ping An International Smart City Technology Co., Ltd., Beijing, China

xieguotong@pingan.com.cn

## Abstract

### Objectives

To quantify how the efficiency of testing and tracing (average time interval from infection to quarantine of each individual) affect the COVID-19 epidemic.

### Setting

We developed a novel individual-level network model (CoTECT) with key parameters obtained from recent studies to quantify the impacts of testing and tracing efficiency. It distinguishes infection from confirmation by integrating a stage T as confirmed by testing and quarantined. Stages such as pre-symptomatic (E), asymptomatic (I), symptomatic (Is), death with (F) or without (f) test confirmation are also included. Three scenarios were evaluated in a closed population of 3000 individuals to mimic the community-level dynamic. Real-world data from four Nordic countries and Beijing's second outbreak were also analyzed.

### Primary and secondary outcome measures

Simulation result: total/peak daily infections and confirmed cases; total deaths (confirmed/unconfirmed by testing), fatalities, case fatality rates. Real-world analysis: confirmed cases and deaths per million people.

### Results

1) Shortening the time interval between Is and T from 12 days to 4 days results in an 85.2% reduction in infections and an 88.8% decrease in deaths. 2) Testing and tracing regardless of symptoms (7-day interval for Is to T, E/I to T interval change correspondingly) reduces 35.7% of infections and 46.2% of deaths compared to testing Is alone. 3) A 10-day versus a 50-day delay to implement efficient testing and tracing reduces infections and deaths by 35.2% and 44.6%. The results were robust to sensitivity analyses. Analysis of the real-world data shows that tests per case in early-stage epidemics are critical in reducing confirmed cases and fatality rates.

### Conclusions

Reducing testing delays in all symptomatic and pre- and asymptomatic cases is an effective containment strategy for COVID-19 outbreaks. These results provide professionals and policymakers with quantitative evidence on the critical value of efficiency in developing testing and contact tracing strategies.

### Strengths and limitations of this study

1. This work provides a new perspective to evaluate testing and tracing effect besides tests volume at the individual level, which is the efficiency of testing and tracing (define as the average time interval for each case from initial infection to test confirmation and quarantine).
2. We quantified the effects of different testing efficiency and tracing and verified its important role in the control of the COVID-19 epidemic.

1  
2  
3  
4  
5  
6  
7  
8  
9  
10  
11  
12  
13  
14  
15  
16  
17  
18  
19  
20  
21  
22  
23  
24  
25  
26  
27  
28  
29  
30  
31  
32  
33  
34  
35  
36  
37  
38  
39  
40  
41  
42  
43  
44  
45  
46  
47  
48  
49  
50  
51  
52  
53  
54  
55  
56  
57  
58  
59  
60

3. This graphical model with a novel structure can distinguish between the actual number of infections and confirmed cases, differentiate pre- and asymptomatic from symptomatic patients, and be further optimized to assess the effectiveness of various interventions in controlling COVID-19.

4. Limitations of this work include that all simulations were conducted in a closed population and did not account for inter-community social activity. Network sizes were also limited by computing complexity.

5. Confounders such as differences in population aging level, medical resources, and lockdown procedures could be considered in our model in future work.

## Introduction

Coronavirus disease 2019 (COVID-19) has posed severe challenges to the physical and mental health of people worldwide since December 2019<sup>1</sup>. Warnings of recurrence are alarming as lockdown measures are being lifted, and there is no guarantee that large-scale testing alone will control the pandemic. We believe that testing policies must factor efficiency (reducing the average time interval from initial infection to test confirmation and quarantine). Severe acute respiratory syndrome coronavirus 2 (SARS-CoV-2) is more contagious and has a longer incubation time than either SARS-CoV and MERS-CoV<sup>2</sup>, and can transmit during the incubation period<sup>3,4,5,6,7</sup>. About a third of SARS-CoV-2 infectors in Spain remain asymptomatic<sup>8</sup> and contagious. Suppose the efficiency of testing and contact tracing is low. In that case, transmission via latent, pre- and asymptomatic infected individuals may lead to a more severe spread, and some transmission models applied to the previous epidemic are not suitable for SARS-CoV-2. Furthermore, many models do not quantify the influence of efficiency.

The impact of test and quarantine interventions has been widely evaluated using different models. Some findings highlighted the volume of testing, contact tracing strategy, or combination of other interventions<sup>9,10,11,12,13,14-19</sup>. For example, Luís Carlos Lopes-Júnior et al.<sup>20</sup> provided a protocol to evaluate evidence on the influence of the testing capacity for symptomatic individuals in the control of COVID-19, which we referred to in literature research of the effect of testing<sup>20</sup>. McCombs A et al.<sup>21</sup> compared strategies of different testing priority (people with high-risk/low-risk are tested first, people with symptoms appeared recently/earlier are tested first) under the condition that the maximum test volume per day is fixed. Adam J Kucharski et al.<sup>22</sup> simulated the effects of random mass testing of 5% of the population each week on transmission reduction and compared it with isolation and tracing effects, without analysis on different testing scenarios. Alyssa Bilinski et al.<sup>13</sup> explored whether testing included all identified contacts or only those with symptoms affected effective reproductive number. However, few research focused on how the efficiency of testing or contact tracing limits the disease spread and the degree to which testing efficiency and contact tracing policies contribute to containment efficacy. The efficiency (or timeliness) of testing is not necessarily related to the total amount of testing, so we reasoned for novel factors, strategies, and model structure.

1  
2  
3 In this study, we developed a novel network model, CoTECT, based on R package Epimodel<sup>23</sup>  
4 to evaluate how testing and contact tracing efficiency affect the epidemic's spread. CoTECT  
5 incorporates confirmed and unconfirmed infections, including the symptomatic, pre-or  
6 asymptomatic, or deceased, to simulate how the efficiency of testing and quarantine impacts  
7 epidemic outcomes. We simulated three different scenarios with controlled variables that aimed  
8 to eliminate confounding factors. Analysis of real-world data from four Nordic countries  
9 revealed that delays in countermeasures adversely affect the outcome of the epidemic. We  
10 provide a comprehensive and quantitative assessment of the critical factors of testing and  
11 contact tracing, which will help us implement more effective measures to contain the pandemic.  
12  
13  
14

## 15 16 **Methods**

### 17 18 **CoTECT simulation model**

19  
20  
21 CoTECT is a self-developed stochastic epidemiological network model built on  
22 mathematical modeling of infectious disease dynamics platform with R language called  
23 Epimodel, and it allows the user to construct a flexible network <sup>24</sup>with the desired  
24 likelihood of connection conditional on the graph with specific network properties <sup>25</sup>  
25  
26 <sup>26</sup>.

27  
28 The platform supports stochastic network models developing with self-defined contact  
29 mode and interaction between different nodes (stand for individuals), which is different  
30 from the ordinary differential equation (compartmental) mode, which assumes human  
31 social activity is based on a large, homogenous, well-mixed population. Instead, every  
32 interaction is a stochastic process on CoTECT. The underlying network is called  
33 exponential-family random graph models (ERGMs)<sup>27</sup>, developed by Holland and  
34 Leinhardt 1,2. CoTECT assumes all tests hold the best sensitivity and specificity, which  
35 described false-positive and true-negative as a small probability event.  
36  
37  
38

39  
40 Based on the traditional Susceptible-Exposed-Infectious-Recovered (SEIR) structure, we  
41 designed the CoTECT model with eight compartments (Figure 1):

- 42 1. Susceptible individuals (S);
- 43 2. Exposed to the virus (E), cases in incubation period. E cases are infectious based on the  
44 biological characteristics of SARS-CoV-2;
- 45 3. Infections without observable symptoms (I). Some I cases become symptomatic and  
46 transfer to the Is compartment.
- 47 4. Infectious and symptomatic cases (Is) are more likely to appear in the T compartment  
48 than I or E cases, as symptomatic cases are easier to detect.
- 49 5. Test-positive cases with quarantine (T); we assumed all cases confirmed by testing were  
50 immediately quarantined.
- 51 6. Test-positive fatalities (F);
- 52 7. Fatality without a positive test confirmation (f);
- 53 8. Recovered cases (R).

54  
55 Full details are shown in Figure 1.  
56  
57  
58  
59  
60

All arrows represent transmission rate from one compartment to the other, such as from Is to T denoted as IsT rate.

Infectious happens on the existed edge (real contact) between two nodes (persons) in a given probability. In our model, the infection rate is determined by SE rate and act times, which is the contact times between a susceptible person and an exposed person. The exposed states represent the incubation period with relatively lower transmission ability than infected patients with symptoms. This probability setting is based on the epidemiological characteristics of COVID-19. If the SE rate is  $p$  and the average act times is three times, the infection probability between two connected nodes (people) is  $1 - (1 - p)^3$ . Meanwhile, the edge connecting two nodes is generated and dissolved by a stochastic process with conditions. The conditional probability of an edge forming and dissolving is based on a Bernoulli distribution with the module-specific parameter, and the resulting degree distribution is a binomial mixture<sup>27</sup>.

Besides the infection process, all transmission rate from A module to B implies that the mean duration of remaining the A statues. For example, a 0.1 recovery rate (IR rate) indicates a ten days duration of recovery. All transmission of statues of each node is a Bernoulli process in a matter of time. The Basic reproductive number  $R_0$  is measured based on the simulated result of changing the number of total infections (E+I+Is+T). We adjusted the network-related parameters to approach a WHO reported  $R_0$  of SAR-COV-2 on our baseline model, as shown in Figure-2 A. Figure1-B displayed the stochastic process of the edge generation and desolvation and represented the dynamic change of our social network, which had led to the abbreviation version of the contact network on different time steps

### Parameter settings

We parameterized the model using published values from multiple references<sup>28,29,30 31,32</sup>, most of which were cases-level data statistics<sup>5,33,34,35</sup>. The parameters, including incubation period<sup>36 4</sup>, average time from onset to severe case<sup>30</sup>, and average recovery times<sup>34</sup> for mild or severe cases, are shown in Table S1. Sampled parameters were set at different grades within different scenarios, while fixed parameters remained constant across all experiments. A hypothetical population of 3,000 people over 300 days was used. Our assumptions and network parameters are aligned with ERGMs, which are listed in supplemental Table 2. The basic reproductive number ( $R_0$ ) of the baseline model was 2.2 by adjusting the edge density, maximum connection number, and probability of transmission between connected nodes (Table S2). Testing and tracing efficiencies were defined as an average of each individual's waiting interval from exposed/infected/symptom onset to test confirmation and quarantine. Efficiency is translated as transmission rate in CoTECT (IsT rate, IT rate, ET rate is the reciprocal of the waiting interval). For example, an average 7-day waiting time from symptom onset to quarantine is corresponding to the 1/7 transmission rate.

The efficiency parameters (IsT rate, IT rate, ET rate) are set correspondingly in all experiment settings. The time interval from E to I was six days, based on an average of 6.4 days<sup>4 7 29 32</sup> from exposure to infection (incubation period). Therefore, the denominator of the IT rate is

usually six days more than that of ET rate. The same logic applied to the IsT rate. Nevertheless, efficient contact tracing will boost both IT and ET rates.

### Experiment setting

The baseline model is set as the worst condition with no testing and contact tracing. Therefore no quarantine measurements were conducted. As mentioned above, with  $R_0$  being set over 1, most of the population will eventually get infected. On top of it, we simulated different combinations of interventions as preliminary experiments to compare with the baseline. 1) four weeks delayed reaction (with no testing and contact tracing before the fourth week). And test only open to symptomatic cases; 2) four weeks delayed response with the test for symptomatic, pre-and asymptomatic patients; 3) two weeks delayed reaction with the test for symptomatic, pre-and asymptomatic cases.

We designed three scenarios to investigate the significance of testing efficiency. There was only one changing condition with other variables consistent across each scenario. The average of the 20 experiments was used as the final result. The critical outcome indicators include cumulative infection, peak daily infections, peak daily confirmation and quarantine, cumulative confirmed cases and deaths, and CFR.

1) Scenario-1 simulated five different test efficiency levels, represented by five scales of daily transmission rates from Is to T (IsT rate) as 1/4, 1/6, 1/8, 1/10, 1/12. The daily transmission rate from I to T (IT rate) and from E to T (ET rate) changed along with IsT rate.

2) Scenario-2 quantified the importance of efficient contact tracing. Due to asymptomatic transmissibility, contact tracing is critical for effective containment. Tracing efficiency is represented by either the IT or ET rate. Therefore, we designed the simulations with fixed IsT rate (1/7) and different IT (1/12, 1/19, 0) or ET(1/17, 1/24, 0) rates.

3) Scenario-3 was designed based on real-world data analyses showing that response times have significantly varied worldwide. Many countries were not well prepared for the pandemic, and targeted testing and contact tracing measures were often not implemented until after many confirmed case fatalities. We, therefore, simulated different public health response delays in CoTECT. Five experiments were conducted with fixed IsT, IT, and ET rates. The delays applied were 10, 20, 30, 40, and 50 days. Before the responses, we set the transmission rate from E, I, and Is compartments to T as 0.

### Sensitivity analysis

We evaluated transmission progression under conditions with no testing or contact tracing in place for varying population sizes. For all experiments, the mean basic reproduction number was set as an average of 2.2. Network density and relationship duration between nodes were consistent across all experiments.

The sensitivity analysis also included tests on network-related parameters, which describe the disease transmission model's underlying social activity pattern. In our study, the simulation

1  
2  
3 model built upon a graph model consist of edges and nodes. The edge between two nodes  
4 reflects a relatively close contact could transmit the disease with a certain probability. In  
5 CoTECT, the edges can be interpreted as a face to face conversation or share a uber ride. Unlike  
6 the sensitivity analysis about the population size, which emphasizes the unchanged infection  
7 ratio and transmission rate under different network sizes, the network-related parameter test  
8 will demonstrate how these parameters impact the disease transmission.  
9  
10

11  
12 We tested each edges' mean duration (contact), concurrent edges (how many simultaneous  
13 contacts happened per day), and the whole network's density. These results are included in  
14 supplemental materials (Figure S1, Table S3). As mentioned in the main text, the final set of  
15 these parameters are tuned based on the simulated baseline's R0(basic reproductive number).  
16  
17

### 18 **Patient and Public Involvement**

19 Patients and the public were not involved in this study.  
20  
21

### 22 **Results**

23  
24 We carried out preliminary experiments to show how the CoTECT model simulates the  
25 transmission under different testing conditions and contact tracing. We then demonstrated in  
26 detail the impacts of comprehensive testing and contact tracing efficiency, contact tracing  
27 efficiency for pre-and asymptomatic cases, and delayed implementation of efficient testing and  
28 contact tracing on disease transmission.  
29  
30  
31

### 32 **Preliminary results of CoTECT simulation**

33  
34 We first defined the baseline model as the worst-case scenario with no epidemiological  
35 interventions conducted in a closed population. The baseline R0 was 2.2, according to the  
36 average R0 estimated<sup>37</sup> from 177 countries and territories<sup>38</sup>. (Figure 2A), aligned with  
37 previously published studies<sup>30</sup>. Then we compared the baseline model with different  
38 combinations of testing and contact tracing interventions to evaluate their respective impact on  
39 disease transmission. The infection curve is shown in Figure 2B. We assumed each community  
40 responded a minimum of several weeks after the first infection. The dark blue line indicates the  
41 outcome for a delay of four weeks and testing only symptomatic cases. Total infections, peak  
42 daily infections, and total deaths were reduced by 13.2%, 43.7%, and 27.3%, respectively,  
43 compared to baseline. The navy line shows the outcome of an open test policy with efficient  
44 contact tracing. Total infections, peak daily infections, and total deaths decreased by 23.4%,  
45 43.1,% and 41.3%, respectively, compared to baseline. The light blue line shows the outcome  
46 for a delay of two weeks after the first infection. Total infections, peak daily infections, and  
47 total deaths decreased by 44.1%, 75.8,% and 61.0%, respectively, compared to baseline.  
48  
49  
50  
51  
52  
53

54  
55 Daily new symptomatic,pre-anddd asymptomatic cases confirmed by testing in three conditions  
56 are shown in Figure 2C. Compared with condition-1 (only testing symptomatic cases with 4-  
57 week delay), condition-2 (testing and tracing pre- and asymptomatic contacts with 4-week  
58 delay) could reduce 24.8% of total confirmed cases (from 125 to 94), and 26.5% of 94  
59  
60



1  
2  
3 confirmed cases were diagnosed before symptom onset (E+I). Condition-3 (testing and tracing  
4 contacts with a 2-week delay) could reduce 51.2% of total confirmed cases (from 125 to 61),  
5 33.6% of 61 confirmed cases were diagnosed before symptom onset (E+I). Moreover,  
6 compared to condition-2, Condition-3 also reduced daily peak confirmed Is, I, and E cases by  
7 65.8% (from 38 to 13), 75.0% (from 16 to 4), and 75.0% (from 20 to 5), respectively. We  
8 further demonstrated trends of all compartments in baseline and different conditions (Figure  
9 2D). Compared to baseline, as infections decreased in 3 conditions, the S individuals (those  
10 who remain uninfected) of condition-1, -2, -3 were 6.6, 11.6, and 20.7 times of S individuals  
11 of baseline model after 300 days of the epidemic, respectively. Meanwhile, 27.7%, 41.5%, and  
12 61.2 % of deaths (confirmed and unconfirmed by testing) of the baseline model were saved in  
13 condition-1, -2, -3, respectively. These results indicate that reduced time to action and better  
14 identification of pre-and asymptomatic cases are critical factors in flattening the infection curve  
15 and decreasing the deaths.  
16  
17  
18  
19  
20

### 21 **Impacts of overall testing and contact tracing efficiency to all infectors**

22  
23  
24 Three scenarios were designed to quantify the impacts of different testing interventions on  
25 transmission. The outcome indicators included final cumulative infections (R+F+f), peak daily  
26 infections (E+I+Is), peak daily test-positive cases with quarantine (T), cumulative test positive  
27 (T) cases, total fatalities, and CFR.  
28  
29

30  
31 Scenario-1 evaluated the impact of overall testing and contact tracing efficiency by simulating  
32 five different levels of test efficiency, represented by five scales of daily transmission rate or  
33 average IsT rate. The intervals from symptom onset to positive test with quarantine were 4, 6,  
34 8, 10, and 12 days. The corresponding IsT rates were 1/4, 1/6, 1/8, 1/10, and 1/12, thus  
35 reflecting different testing efficiencies. This scenario assumes that contact tracing efficiency  
36 changed with the IsT rate, and therefore latent, asymptomatic cases could also be tested. We  
37 found that longer public health response delays (i.e., lower IsT rates) resulted in higher peak  
38 daily new transmitters, peak daily new diagnoses, and overall cumulative infections. Besides,  
39 the number of diagnosed and undiagnosed fatalities and the proportion of undiagnosed fatalities  
40 increased as IsT rates declined, indicating that fewer tests and slower response times resulted  
41 in worse epidemic outcomes. We decreased the IsT delay from 12 to 4 days in two days  
42 intervals and found that, compared to baseline, total infections decreased by 20.5%, 29.2%,  
43 39.0%, 57.0% and 88.3%, respectively, and total deaths decreased by 36.0%, 46.7%, 52.2%,  
44 70.6% and 92.8%, respectively. Peak daily infections across the five experiments increased  
45 linearly as IsT rates decreased (Table 1, Figure 3A).  
46  
47  
48  
49  
50  
51  
52  
53  
54  
55  
56  
57  
58  
59  
60

**Table 1: Baseline and Scenario-1, -2, and -3 model outcomes**

|             | Delay (days) to targeted testing and contact tracing (T delay) | Average waiting interval (days) from Is to T (1/IsT rate) | Average waiting interval (days) to from I to T (1/IT rate) | Total infections | Peak daily infections | Peak daily test confirmation | Total deaths | The proportion of unconfirmed deaths in total deaths |
|-------------|----------------------------------------------------------------|-----------------------------------------------------------|------------------------------------------------------------|------------------|-----------------------|------------------------------|--------------|------------------------------------------------------|
| Baseline    | No testing                                                     | No IsT transformation                                     | No IT transformation                                       | 2933.6           | 1553.2                | 0                            | 78.1         | 100%                                                 |
| Scenario -1 | 0                                                              | 4                                                         | Yes                                                        | 344.3            | 48.7                  | 38.1                         | 5.6          | 36%                                                  |
|             |                                                                | 6                                                         |                                                            | 1261.4           | 181.8                 | 128.3                        | 23           | 39%                                                  |
|             |                                                                | 8                                                         |                                                            | 1789             | 328.5                 | 208.9                        | 37.3         | 49%                                                  |
|             |                                                                | 10                                                        |                                                            | 2077.3           | 425                   | 251.8                        | 41.6         | 54%                                                  |
|             |                                                                | 12                                                        |                                                            | 2330.8           | 581                   | 318.3                        | 50           | 56%                                                  |
| Scenario -2 | 0                                                              | 7                                                         | No IT transformation                                       | 2510.9           | 800.4                 | 315                          | 57.2         | 67%                                                  |
|             |                                                                | 13                                                        | 1941.2                                                     | 396.6            | 213                   | 38.1                         | 51%          |                                                      |
|             |                                                                | 11                                                        | 1614.6                                                     | 285.5            | 168.9                 | 30.8                         | 45%          |                                                      |
| Scenario -3 | 10                                                             | 7                                                         | Yes                                                        | 1857.6           | 360.1                 | 233.4                        | 37.2         | 46%                                                  |
|             | 20                                                             |                                                           |                                                            | 1922.6           | 456.2                 | 294.4                        | 37.8         | 49%                                                  |
|             | 30                                                             |                                                           |                                                            | 2272.3           | 764.1                 | 455.5                        | 45.2         | 55%                                                  |
|             | 40                                                             |                                                           |                                                            | 2649.8           | 1129.5                | 543                          | 58.6         | 71%                                                  |
|             | 50                                                             |                                                           |                                                            | 2866.7           | 1231.6                | 400.5                        | 67.1         | 82%                                                  |

**Impacts of contact tracing efficiency for pre-and asymptomatic cases**

Scenario-2 evaluated the impact of tracing efficiency for pre-and asymptomatic cases by simulating different IT and ET rates with a fixed IsT rate. Contact tracing for Covid-19 is critical due to the transmissibility of pre-and asymptomatic infections. The IT and ET rates reflect contract tracing efficiency. In this scenario, the probability that latent and asymptomatic (or mild) cases would be tested and isolated (ET and IT rate) was adjusted by 0, 1/13, and 1/11.

1  
2  
3 The fixed IsT rate was 1/7, which assumed seven days waiting for an interval from onset to  
4 quarantine. The results showed that larger ET and IT rates resulted in fewer overall infections,  
5 confirmed cases, and confirmed and unconfirmed fatalities. More efficient contact tracing (12-  
6 day delay from infected to testing for I cases) would prevent 36% of cumulative infections, 64%  
7 of peak daily infections, 46% of peak daily confirmed cases, and 46% of total deaths compared  
8 to no contact tracing. Less efficient contact tracing (as a 19-day delay from infected to testing  
9 for I patients) prevented 23% of cumulative infections, 50% of peak daily infections, 32% of  
10 peak daily confirmed cases, and 33% of total fatalities compared to no contact tracing. Thus,  
11 more efficient contact tracing resulted in fewer infections (Table 1, Figure 3B).  
12  
13  
14  
15

### 16 **Impacts of delayed implementation of efficient testing and contact tracing**

17

18  
19 Scenario-3 evaluated the impact of delayed implementation of efficient testing and contact  
20 tracing. The delay intervals between the first infection and implementation of targeted testing  
21 were set as 10, 20, 30, 40, and 50 days. We found that cumulative infections and fatalities  
22 increased with increasing delay intervals. Compared to 50-day delay, delays of 10, 20, 30 and  
23 40 days reduced total infections by 35.2%, 32.9%, 20.7% and 7.6%, respectively, and total  
24 deaths by 44.6%, 43.7%, 32.6% and 12.7%, respectively. The increase in peak daily  
25 transmitters as delay interval increased followed a sigmoid-shape curve (Table 1, Figure 3C).  
26 Clearly, implementing a prompt testing response within 20 days of the first infection had much  
27 more impact than response 20 days later.  
28  
29  
30  
31

32 The critical impacts of prompt reaction for testing are presented in our simulation and observed  
33 in real-world data. The sufficiency testing measures were the number of tests conducted per  
34 confirmed case (TPC) and tests per million people (TPM). Here, efficiency is measured as the  
35 time interval between infection and positive Covid19 test, and sufficient testing capacity,  
36 estimated by TPC and TPM, is a prerequisite for efficiency. Decreasing TPC trends indicate  
37 that disease transmission is outpacing testing, and efficiency is decreasing. The three indicators  
38 of epidemic control were CFR, confirmed cases per million people (CPM), and deaths per  
39 million people (DPM).  
40  
41  
42  
43

44 We selected four Nordic countries with similar medical resources, population aging level,  
45 geography, and climate for comparison (Figure 4). Day 0 was the day when daily DPM reached  
46 0.1. Norway, Finland, and Denmark experienced a similar proportion of lockdown duration in  
47 the first 70 days, and TPC trends over the early 70 days all increased. From Day 0 to 14, TPC  
48 was highest in Norway, followed by Finland and Denmark. Between Day 15 and 70, even  
49 though the TPCs in Norway and Finland were similar, the CFR in Norway (2.8%) was lower  
50 than in Finland (4.6%). This implies that the early-outbreak TPC values are a more significant  
51 factor than later TPC in controlling the epidemic. Denmark had the lowest early-outbreak TPC  
52 of the above three countries. Even though its TPC later grew dramatically and far exceeded  
53 those of Norway and Finland, its CFR (4.9%) was higher than either Norway or Finland. We  
54 also observed that overall TPM in Denmark from Days 0 and 70 was 2.7 times those of Norway  
55 and Finland. This implies that early-stage TPC may have a more significant influence on the  
56 overall CFR than late-stage TPC, consistent with our hypothesis that early testing plays a  
57  
58  
59  
60

1  
2  
3 critical role, without which, testing efforts must be heavily increased as transmission rates  
4 worsen. In Sweden, TPC gradually decreased. Sweden's CFR (12%) was the highest of all four  
5 countries. This indicates that early-stage insufficient testing might not be saved by increasing  
6 testing volume in the later period.  
7  
8

### 9 10 **Sensitivity Analysis**

11  
12 Using sensitivity analyses, we compared baseline models with population sizes of 1000, 2000,  
13 3000, 4000, and 5000. The proportions of cumulative infections, peak daily infections, and  
14 cumulative deaths were similar across all five models. However, variation was much more  
15 significant between the 1000 and 2000 population models than between population models of  
16 3000 or more. These findings were our rationale for using a representative population model of  
17 3000 (Figure S1, Table S3).  
18  
19

20  
21 Sensitivity analysis of network-related parameters emphasis how does the structure of social  
22 network impacts disease transmission. The density of the network will directly impact disease  
23 transmission speed (FigureS1, Table S3). The extremely low density is difficult to maintain  
24 nowadays. We can expect to see it happened in a lockdown town in a short period. Decreasing  
25 the number of concurrent nodes with fixed density will skew the infection number curve. It also  
26 affects the variance since nodes with concurrent become a critical node that can spread the  
27 disease to many other nodes. The duration of edges indicates the stability of the relationship  
28 between two nodes. The result revealed that the increase of the stability would flatten the  
29 infection curve. It is clear that if we only contact the same group of people repeatedly, the  
30 possibility of being infected will drop.  
31  
32  
33  
34  
35

### 36 **Discussion**

37 Our model quantifies how testing and contact tracing efficiency can influence the transmission  
38 of COVID-19 and indicates that early, efficient testing and contact tracing can reduce disease  
39 transmission and mitigate overall fatalities. We believe it is critical to consider the transmission  
40 rates from pre-and asymptomatic cases in simulation models, which is the daily probability for  
41 an infected person to become confirmed and quarantined. Public health leaders should  
42 implement testing and contact tracing as soon as possible after cases are identified to minimize  
43 transmission rates for an outbreak. Our results provide professionals and policymakers with  
44 quantitative evidence on the critical value of efficiency in developing testing and contact tracing  
45 strategies, especially instructive for nations undergoing or expecting the second/third wave of  
46 Covid-19.  
47  
48  
49  
50

51 Compared with previous studies, which mostly emphasized the amount of testing, we did not  
52 limit our analysis to estimate the fixed total amount of testing required since the capacity of  
53 testing changed over time. Instead, we revealed that earlier and more efficient testing could  
54 reduce the number of infections, therefore reduce testing demand. Many studies already<sup>39</sup>  
55 proved some test strategies could release the pressure of test kits shortage<sup>40</sup>. However, we  
56 focused more on the waiting time of exposed people receive their test results (efficiency of  
57 testing and contact tracing). The methodology novelty was reflected in the model structure and  
58  
59  
60

1  
2  
3 scenario design. CoTECT can measure the timeliness of test measures taken for each individual  
4 to a macro perspective outcome.  
5  
6

7 The mathematical pattern of communicating disease transmission is well studied, while  
8 researchers still unable to precisely predict how large a novel infectious disease will impact a  
9 given population. It is because the outcome is decided by both human intervention and virus  
10 activities. It is better describing as a dynamic process where humans are racing with the virus.  
11 We learned from Beijing's successful story that efficient testing, tracking, and quarantine could  
12 save millions of lives from COVID-19. This study inductively assumes that Beijing's valuable  
13 experience can be summarized as an efficient test and tracing work. And then, we tested our  
14 assumption on a well-designed individual-based contact network model. It is reported that  
15 testing, tracing, and targeted quarantine are more economical approaches in the long term<sup>41</sup>.  
16 Efficient testing and tracing require hard work and maintains vigilance for a long time.  
17 However, the reward is much more attempting.  
18  
19  
20  
21  
22

23 The mean waiting time from receiving the COVID-19 test to confirmation is 4.1 days in the  
24 United States, which is reported to be disadvantageous to epidemic control <sup>42</sup>. According to  
25 Scenario-1, a 4-day extra waiting interval will cause a tremendous difference in total infection  
26 and death. Another example of the value of efficient testing is the successful containment of  
27 the second outbreak wave in Beijing, China. Highly efficient testing(opened to all, with or  
28 without symptoms) and contact tracing began immediately after the first case was identified<sup>43</sup>  
29 <sup>44,45 46</sup> (Table S4,S5), in mark contrast to the first outbreak in Wuhan testing was less efficient,  
30 and containment was slower. Government leaders should aim to both increase testing and  
31 shorten the time from testing to quarantine.  
32  
33  
34  
35

36 Besides test efficiency for each individual, the prompt reaction (including contact tracing,  
37 quarantine, and lockdown) of the pandemic in the early stage (first month since the first case)  
38 will save many infections even in a close population. If we consider the distance of cities and  
39 border check, an exponential number of people will be protected by locking the specific town  
40 early. Although many countries have built an advanced epidemic surveillance report system,  
41 the inadequate use and insufficient emphasis require more attention.  
42  
43  
44

45 The size of the population is irrelevant to the disease transmission rate. Therefore, our main  
46 conclusion could generalize to different circumstances, from megacity like Beijing to every  
47 small village. China has adopted a prompt reaction with the efficient test. Furthermore, this  
48 highly efficient work requirement has become a policy applied in every corner of Mainland  
49 China. Since 2020 March, there is an apparent under-controlled situation observed in China,  
50 and even the medical resource (hospital bed, ICU, physician number per capita <sup>47</sup>) is much less  
51 than a developed country like Germany and United States.  
52  
53  
54

55 Our experiment and real-world data justified the pandemic's magic weapon as fast and alert  
56 actions instead of a massive test capacity. With medical research development, we sincerely  
57 expect a quicker and more solid vaccine development process in the future. However, before  
58 the vaccine was delivered to everyone, the best lesson we learned from COVID-19 is still the  
59  
60

1  
2  
3 efficiency test, contact tracing, and quarantine, which required close cooperation between the  
4 government, the public health sector, and people living in this country. Admit the new virus's  
5 dangers are the critical first step to survive this pandemic <sup>48</sup>.  
6  
7

8  
9 Limitations of this work include that all simulations were conducted in a 3000 population-and  
10 did not account for immigration or inter-community social activity. Network sizes were also  
11 limited by computing complexity. Confounders such as differences in population aging level,  
12 medical resources, and lockdown procedures could be considered in our future work model.  
13 Besides, the model cannot estimate the socio-economic resources required for efficient  
14 testing. We will continue to study the impact of testing and contact tracing efficiency with  
15 constraints and countermeasures and improve our model in the future.  
16  
17

### 18 19 **Contributorship statement**

20 Y. Hu designed and directed the project; Y. Hu and J. Guo wrote the article; X. Li, G. Li,  
21 X. Lu, Y. Zhang, L. Cong, Y. Kang, and X. Jia aided in data analysis or writing framework.  
22 X. Li, X. Shi, and G. Xie were supervising the study, L. Zhang was guiding and supervising  
23 the study. All authors meet the ICMJE criteria for authorship.  
24  
25

### 26 27 **Declaration of interests**

28 We declare no competing interests.  
29

### 30 31 **Data sharing**

32 Data are available in a public, open access repository. Data are available upon reasonable  
33 request. Data are available by emailing [moehu@foxmail.com](mailto:moehu@foxmail.com).  
34  
35

### 36 37 **Acknowledgments**

38 We thank Kelly C. McMilan Ph.D. for editing the English text of a draft of this  
39 manuscript.  
40

### 41 42 **Funding**

43 There is no funding to report for this submission.  
44

### 45 46 **References**

- 47 1. Silva Junior FJGd, Sales JCeS, Monteiro CFdS, et al. Impact of COVID-19 pandemic on  
48 mental health of young people and adults: a systematic review protocol of  
49 observational studies. *BMJ Open* 2020;10(7):e039426. doi: 10.1136/bmjopen-2020-  
50 039426
- 51 2. Petrosillo N, Viceconte G, Ergonul O, et al. COVID-19, SARS and MERS: are they closely  
52 related? *Clin Microbiol Infect* 2020;26(6):729-34. doi: 10.1016/j.cmi.2020.03.026  
53 [published Online First: 2020/04/03]
- 54 3. Furukawa NW, Brooks JT, Sobel J. Evidence supporting transmission of severe acute  
55 respiratory syndrome coronavirus 2 while presymptomatic or asymptomatic.  
56 *Emerging infectious diseases* 2020;26(7)  
57  
58  
59  
60

- 1  
2  
3  
4 4. Backer JA, Klinkenberg D, Wallinga J. Incubation period of 2019 novel coronavirus  
5 (2019-nCoV) infections among travellers from Wuhan, China, 20-28 January 2020.  
6 LID - 10.2807/1560-7917.ES.2020.25.5.2000062 [doi] LID - 2000062. (1560-7917  
7 (Electronic))
- 8  
9 5. Yu P, Zhu J, Zhang Z, et al. A Familial Cluster of Infection Associated With the 2019  
10 Novel Coronavirus Indicating Possible Person-to-Person Transmission During the  
11 Incubation Period. *J Infect Dis* 2020;221(11):1757-61. doi: 10.1093/infdis/jiaa077  
12 [published Online First: 2020/02/19]
- 13  
14 6. Lipsitch M, Cohen T, Cooper B, et al. Transmission Dynamics and Control of Severe  
15 Acute Respiratory Syndrome. *Science* 2003;300(5627):1966. doi:  
16 10.1126/science.1086616
- 17  
18 7. Jiang X, Rayner S, Luo MH. Does SARS-CoV-2 has a longer incubation period than SARS  
19 and MERS? *Journal of medical virology* 2020;92(5):476-78.
- 20  
21 8. Pollán M, Pérez-Gómez B, Pastor-Barriuso R, et al. Prevalence of SARS-CoV-2 in Spain  
22 (ENE-COVID): a nationwide, population-based seroepidemiological study. *The  
23 Lancet* 2020
- 24  
25 9. Kretzschmar ME, Rozhnova G, Bootsma MCJ, et al. Impact of delays on effectiveness of  
26 contact tracing strategies for COVID-19: a modelling study. *The Lancet Public  
27 Health* 2020;5(8):e452-e59. doi: 10.1016/S2468-2667(20)30157-2
- 28  
29 10. Hellewell J, Abbott S, Gimma A, et al. Feasibility of controlling COVID-19 outbreaks by  
30 isolation of cases and contacts. *The Lancet Global Health* 2020;8(4):e488-e96. doi:  
31 10.1016/S2214-109X(20)30074-7
- 32  
33 11. Peak CM, Kahn R, Grad YH, et al. Individual quarantine versus active monitoring of  
34 contacts for the mitigation of COVID-19: a modelling study. *The Lancet Infectious  
35 Diseases* 2020;20(9):1025-33. doi: 10.1016/S1473-3099(20)30361-3
- 36  
37 12. Firth JA, Hellewell J, Klepac P, et al. Using a real-world network to model localized  
38 COVID-19 control strategies. *Nature medicine* 2020:1-7.
- 39  
40 13. Bilinski A, Mostashari F, Salomon JA. Modeling Contact Tracing Strategies for COVID-  
41 19 in the Context of Relaxed Physical Distancing Measures. *JAMA Network Open*  
42 2020;3(8):e2019217-e17. doi: 10.1001/jamanetworkopen.2020.19217
- 43  
44 14. Leung K, Wu JT, Liu D, et al. First-wave COVID-19 transmissibility and severity in  
45 China outside Hubei after control measures, and second-wave scenario planning: a  
46 modelling impact assessment. *The Lancet* 2020;395(10233):1382-93. doi:  
47 10.1016/S0140-6736(20)30746-7
- 48  
49 15. Flaxman S, Mishra S, Gandy A, et al. Estimating the effects of non-pharmaceutical  
50 interventions on COVID-19 in Europe. *Nature* 2020;584(7820):257-61. doi:  
51 10.1038/s41586-020-2405-7
- 52  
53 16. Müller M, Derlet PM, Mudry C, et al. Testing of asymptomatic individuals for fast  
54 feedback-control of COVID-19 pandemics. *Phys Biol* 2020 doi: 10.1088/1478-  
55 3975/aba6d0 [published Online First: 2020/07/17]
- 56  
57 17. Li Q, Tang B, Bragazzi NL, et al. Modeling the impact of mass influenza vaccination and  
58 public health interventions on COVID-19 epidemics with limited detection capability.  
59 *Math Biosci* 2020;325:108378. doi: 10.1016/j.mbs.2020.108378 [published Online  
60 First: 2020/06/09]

18. Panovska-Griffiths J, Kerr CC, Stuart RM, et al. Determining the optimal strategy for reopening schools, the impact of test and trace interventions, and the risk of occurrence of a second COVID-19 epidemic wave in the UK: a modelling study. *The Lancet Child & Adolescent Health* 2020
19. Kucharski AJ, Klepac P, Conlan A, et al. Effectiveness of isolation, testing, contact tracing and physical distancing on reducing transmission of SARS-CoV-2 in different settings. *medRxiv* 2020
20. Lopes-Júnior LC, Bomfim E, Silveira DSCd, et al. Effectiveness of mass testing for control of COVID-19: a systematic review protocol. *BMJ Open* 2020;10(8):e040413. doi: 10.1136/bmjopen-2020-040413
21. McCombs A, Kadelka C. A model-based evaluation of the efficacy of COVID-19 social distancing, testing and hospital triage policies. *PLOS Computational Biology* 2020;16(10):e1008388. doi: 10.1371/journal.pcbi.1008388
22. Kucharski AJ, Klepac P, Conlan AJK, et al. Effectiveness of isolation, testing, contact tracing, and physical distancing on reducing transmission of SARS-CoV-2 in different settings: a mathematical modelling study. *The Lancet Infectious Diseases* 2020;20(10):1151-60. doi: 10.1016/S1473-3099(20)30457-6
23. Jenness SM, Goodreau SM, Morris M. EpiModel: An R Package for Mathematical Modeling of Infectious Disease over Networks. *J Stat Softw* 2018;84 doi: 10.18637/jss.v084.i08 [published Online First: 2018/05/08]
24. Danon L, Ford AP, House T, et al. Networks and the Epidemiology of Infectious Disease. *Interdisciplinary Perspectives on Infectious Diseases* 2011;2011:284909. doi: 10.1155/2011/284909
25. Mossong J, Hens N, Jit M, et al. Social contacts and mixing patterns relevant to the spread of infectious diseases. *PLoS Med* 2008;5(3):e74. doi: 10.1371/journal.pmed.0050074 [published Online First: 2008/03/28]
26. Ameri K, Cooper KD. A Network-Based Compartmental Model For The Spread Of Whooping Cough In Nebraska. *AMIA Jt Summits Transl Sci Proc* 2019;2019:388-97. [published Online First: 2019/07/02]
27. van der Pol J. Introduction to Network Modeling Using Exponential Random Graph Models (ERGM): Theory and an Application Using R-Project. *Computational Economics* 2019;54(3):845-75. doi: 10.1007/s10614-018-9853-2
28. Russell TW, Hellewell J, Jarvis CI, et al. Estimating the infection and case fatality ratio for coronavirus disease (COVID-19) using age-adjusted data from the outbreak on the Diamond Princess cruise ship, February 2020. LID - 10.2807/1560-7917.ES.2020.25.12.2000256 [doi] LID - 2000256. (1560-7917 (Electronic))
29. Wang D, Hu B, Hu C, et al. Clinical Characteristics of 138 Hospitalized Patients With 2019 Novel Coronavirus–Infected Pneumonia in Wuhan, China. *JAMA* 2020;323(11):1061-69. doi: 10.1001/jama.2020.1585
30. Organization WH. Report of the WHO-China Joint Mission on Cononavirus Disease 2019(COVID-19), 2020.
31. Liu Y, Yan L-M, Wan L, et al. Viral dynamics in mild and severe cases of COVID-19. *The Lancet Infectious Diseases* 2020;20(6):656-57. doi: 10.1016/S1473-3099(20)30232-2



- 1
- 2
- 3
- 4 32. Huang C, Wang Y, Li X, et al. Clinical features of patients infected with 2019 novel
- 5 coronavirus in Wuhan, China. *The Lancet* 2020;395(10223):497-506. doi:
- 6 10.1016/S0140-6736(20)30183-5
- 7
- 8 33. Chan JF-W, Yuan S, Kok K-H, et al. A familial cluster of pneumonia associated with the
- 9 2019 novel coronavirus indicating person-to-person transmission: a study of a family
- 10 cluster. *The Lancet* 2020;395(10223):514-23. doi: 10.1016/S0140-6736(20)30154-9
- 11
- 12 34. Bhatraju PK, Ghassemieh BJ, Nichols M, et al. Covid-19 in Critically Ill Patients in the
- 13 Seattle Region — Case Series. *New England Journal of Medicine*
- 14 2020;382(21):2012-22. doi: 10.1056/NEJMoa2004500
- 15
- 16 35. Li Q, Guan X, Wu P, et al. Early Transmission Dynamics in Wuhan, China, of Novel
- 17 Coronavirus-Infected Pneumonia. (1533-4406 (Electronic))
- 18
- 19 36. Organization WH. Coronavirus disease 2019 (COVID-19) Situation Report – 73: World
- 20 Health Organization, 2020.
- 21
- 22 37. admin. Fitting the parameters of an SIR model to influenza data using Least Squares and
- 23 the graphical Monte Carlo method 2013 [Available from:
- 24 [http://sherrytowers.com/2013/01/29/neiu-lecture-vi-fitting-the-parameters-of-an-sir-](http://sherrytowers.com/2013/01/29/neiu-lecture-vi-fitting-the-parameters-of-an-sir-model-to-influenza-data/)
- 25 [model-to-influenza-data/](http://sherrytowers.com/2013/01/29/neiu-lecture-vi-fitting-the-parameters-of-an-sir-model-to-influenza-data/).
- 26
- 27 38. Max Roser HR, Esteban Ortiz-Ospina and Joe Hasell. ovidcoronavirus. *Our World in*
- 28 *Data* 2020
- 29
- 30 39. Cherif A, Grobe N, Wang X, et al. Simulation of Pool Testing to Identify Patients With
- 31 Coronavirus Disease 2019 Under Conditions of Limited Test Availability. *JAMA*
- 32 *Network Open* 2020;3(6):e2013075-e75. doi: 10.1001/jamanetworkopen.2020.13075
- 33
- 34 40. Fletcher ER. Worldwide Shortage Of COVID-19 Test Agents Plagues Health Systems –
- 35 Even As Infections Surpass 200,000 Health Policy Watch2020 [Available from:
- 36 [https://healthpolicy-watch.news/worldwide-shortage-of-covid-19-test-agents-plagues-](https://healthpolicy-watch.news/worldwide-shortage-of-covid-19-test-agents-plagues-health-systems-even-as-infections-surpass-200000/)
- 37 [health-systems-even-as-infections-surpass-200000/](https://healthpolicy-watch.news/worldwide-shortage-of-covid-19-test-agents-plagues-health-systems-even-as-infections-surpass-200000/) accessed 18/03/2020.
- 38
- 39 41. Mehrotra K. Testing needed for ‘unlock’ would cost 2% of lockdown economic losses,
- 40 says study, encourages antibody tests msn2020 [Available from:
- 41 [https://www.msn.com/en-in/money/markets/testing-needed-for-unlock-would-cost-](https://www.msn.com/en-in/money/markets/testing-needed-for-unlock-would-cost-2percent-of-lockdown-economic-losses-says-study-encourages-antibody-tests/ar-BB14ZsVS?li=AAgfW3S)
- 42 [2percent-of-lockdown-economic-losses-says-study-encourages-antibody-tests/ar-](https://www.msn.com/en-in/money/markets/testing-needed-for-unlock-would-cost-2percent-of-lockdown-economic-losses-says-study-encourages-antibody-tests/ar-BB14ZsVS?li=AAgfW3S)
- 43 [BB14ZsVS?li=AAgfW3S](https://www.msn.com/en-in/money/markets/testing-needed-for-unlock-would-cost-2percent-of-lockdown-economic-losses-says-study-encourages-antibody-tests/ar-BB14ZsVS?li=AAgfW3S).
- 44
- 45 42. David Lazer MAB, Katherine Ognyanova, John Della Volpe. The State of the nation: A
- 46 50-state COVID-19 survey, 2020:298.
- 47
- 48 43. Guo Z. Beijing have tested over 2.948 million people [News]. News China; 2020 [updated
- 49 2020-06-23. Available from: [http://news.china.com.cn/txt/2020-](http://news.china.com.cn/txt/2020-06/23/content_76195219.htm)
- 50 [06/23/content\\_76195219.htm](http://news.china.com.cn/txt/2020-06/23/content_76195219.htm).
- 51
- 52 44. Ziqi W. All Negative! Xinfadi market has completed 5803 swabs for testing results:
- 53 ZhongHong; [Available from:
- 54 [https://baijiahao.baidu.com/s?id=1669485198569240379&wfr=spider&for=pc2020-](https://baijiahao.baidu.com/s?id=1669485198569240379&wfr=spider&for=pc2020-06-14)
- 55 [06-14](https://baijiahao.baidu.com/s?id=1669485198569240379&wfr=spider&for=pc2020-06-14).
- 56
- 57 45. Junlu W. Beijing opened extensive nucleic acid testing among key population groups and
- 58 those who volunteer to get tested: The Xinhua News Agency; 2020 [Available from:
- 59 [http://www.xinhuanet.com/2020-04/20/c\\_1125877832.htm](http://www.xinhuanet.com/2020-04/20/c_1125877832.htm) accessed 2020-06-19.
- 60

- 1  
2  
3  
4  
5  
6  
7  
8  
9  
10  
11
46. China NHCotPsRo. Daily Report of COVID-19 2020 [Available from: [http://www.nhc.gov.cn/xcs/xxgzbd/gzbd\\_index.shtml](http://www.nhc.gov.cn/xcs/xxgzbd/gzbd_index.shtml).]
47. WHO. The 2018 update, Global Health Workforce Statistics, World Health Organization, Geneva. In: WHO, ed., 2018.
48. Abbasi K. Covid-19: politicisation, “corruption,” and suppression of science. *BMJ* 2020;371:m4425. doi: 10.1136/bmj.m4425

## 12 Figure Legend

13  
14  
15  
16  
17  
18  
19  
20  
21  
22

**Figure 1. Introduction of the CoTECT model.** (A) Structure of the network-based epidemiological model CoTECT. (B) Abbreviated version of the infection network progression. Snapshots shown are days 0, 10 and 20 after the first infected individual. Red and blue dots represent infected and susceptible individuals, respectively. Strings represent contact relationships.

23  
24  
25  
26  
27  
28

**Figure 2. Epidemic transmission for the baseline and intervention models.** (A) Violin plots of  $R_0$  distributions for the real-world data and baseline model. (B) Infection curves for the baseline and different intervention models. (C) Daily new symptomatic, pre- and asymptomatic cases confirmed by testing. (D) Compartment trends for the different models.

29  
30  
31  
32  
33  
34  
35

**Figure 3: Scenario-1, Two and Three outcomes.** Total infections over time, peak daily infections for different public health response strategies (each dot represents a simulation) and accumulated deaths (both confirmed and unconfirmed cases) for (A) Scenario-1, (B) Scenario-2 and (C) Scenario-3.

36  
37  
38  
39  
40  
41  
42  
43

**Figure 4: CFR, CPM and DPM trends in representative countries with different TPC and TPM levels.**

(A) Accumulating CFR by COVID-19 and the TPC for 4 countries, starting by the day since daily new deaths due to COVID-19 reached 0.1 per million. (B) Accumulating cases, deaths, and tests per million of COVID-19 of 4 countries.

### 44 Licence statement

45  
46  
47  
48  
49  
50  
51  
52  
53  
54  
55

I, the Submitting Author has the right to grant and does grant on behalf of all authors of the WorkWork (as defined in the below author licence), an exclusive licence and/or a non-exclusive licence for contributions from authors who are: i) UK Crown employees; ii) where BMJ has agreed a CC-BY licence shall apply, and/or iii) in accordance with the terms applicable for US Federal Government officers or employees acting as part of their official duties; on a worldwide, perpetual, irrevocable, royalty-free basis to BMJ Publishing Group Ltd (“BMJ”) its licensees and where the relevant Journal is co-owned by BMJ to the co-owners of the Journal, to publish the Work in BMJ Open and any other BMJ products and to exploit all rights, as set out in our [licence](#).

56  
57  
58  
59  
60

The Submitting Author accepts and understands that any supply made under these terms is made by BMJ to the Submitting Author unless you are acting as an employee on behalf of your employer or a postgraduate student of an affiliated institution which is paying any applicable

1  
2  
3 article publishing charge (“APC”) for Open Access articles. Where the Submitting Author wishes  
4 to make the Work available on an Open Access basis (and intends to pay the relevant APC), the  
5 terms of reuse of such Open Access shall be governed by a Creative Commons licence – details of  
6 these licences and which [Creative Commons](#) licence will apply to this Work are set out in our  
7 licence referred to above.  
8  
9  
10  
11  
12  
13  
14  
15  
16  
17  
18  
19  
20  
21  
22  
23  
24  
25  
26  
27  
28  
29  
30  
31  
32  
33  
34  
35  
36  
37  
38  
39  
40  
41  
42  
43  
44  
45  
46  
47  
48  
49  
50  
51  
52  
53  
54  
55  
56  
57  
58  
59  
60

For peer review only

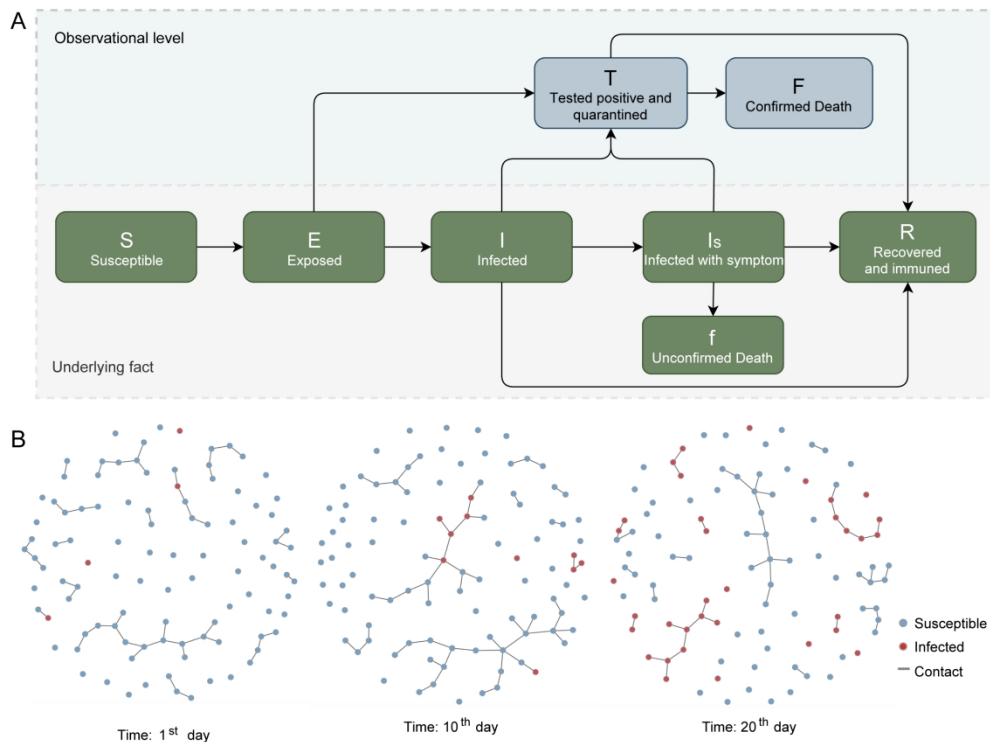

Figure 1. Introduction of the CoTECT model. (A) Structure of the network-based epidemiological model CoTECT. (B) Abbreviated version of the infection network progression. Snapshots shown are days 0, 10 and 20 after the first infected individual. Red and blue dots represent infected and susceptible individuals, respectively. Strings represent contact relationships.

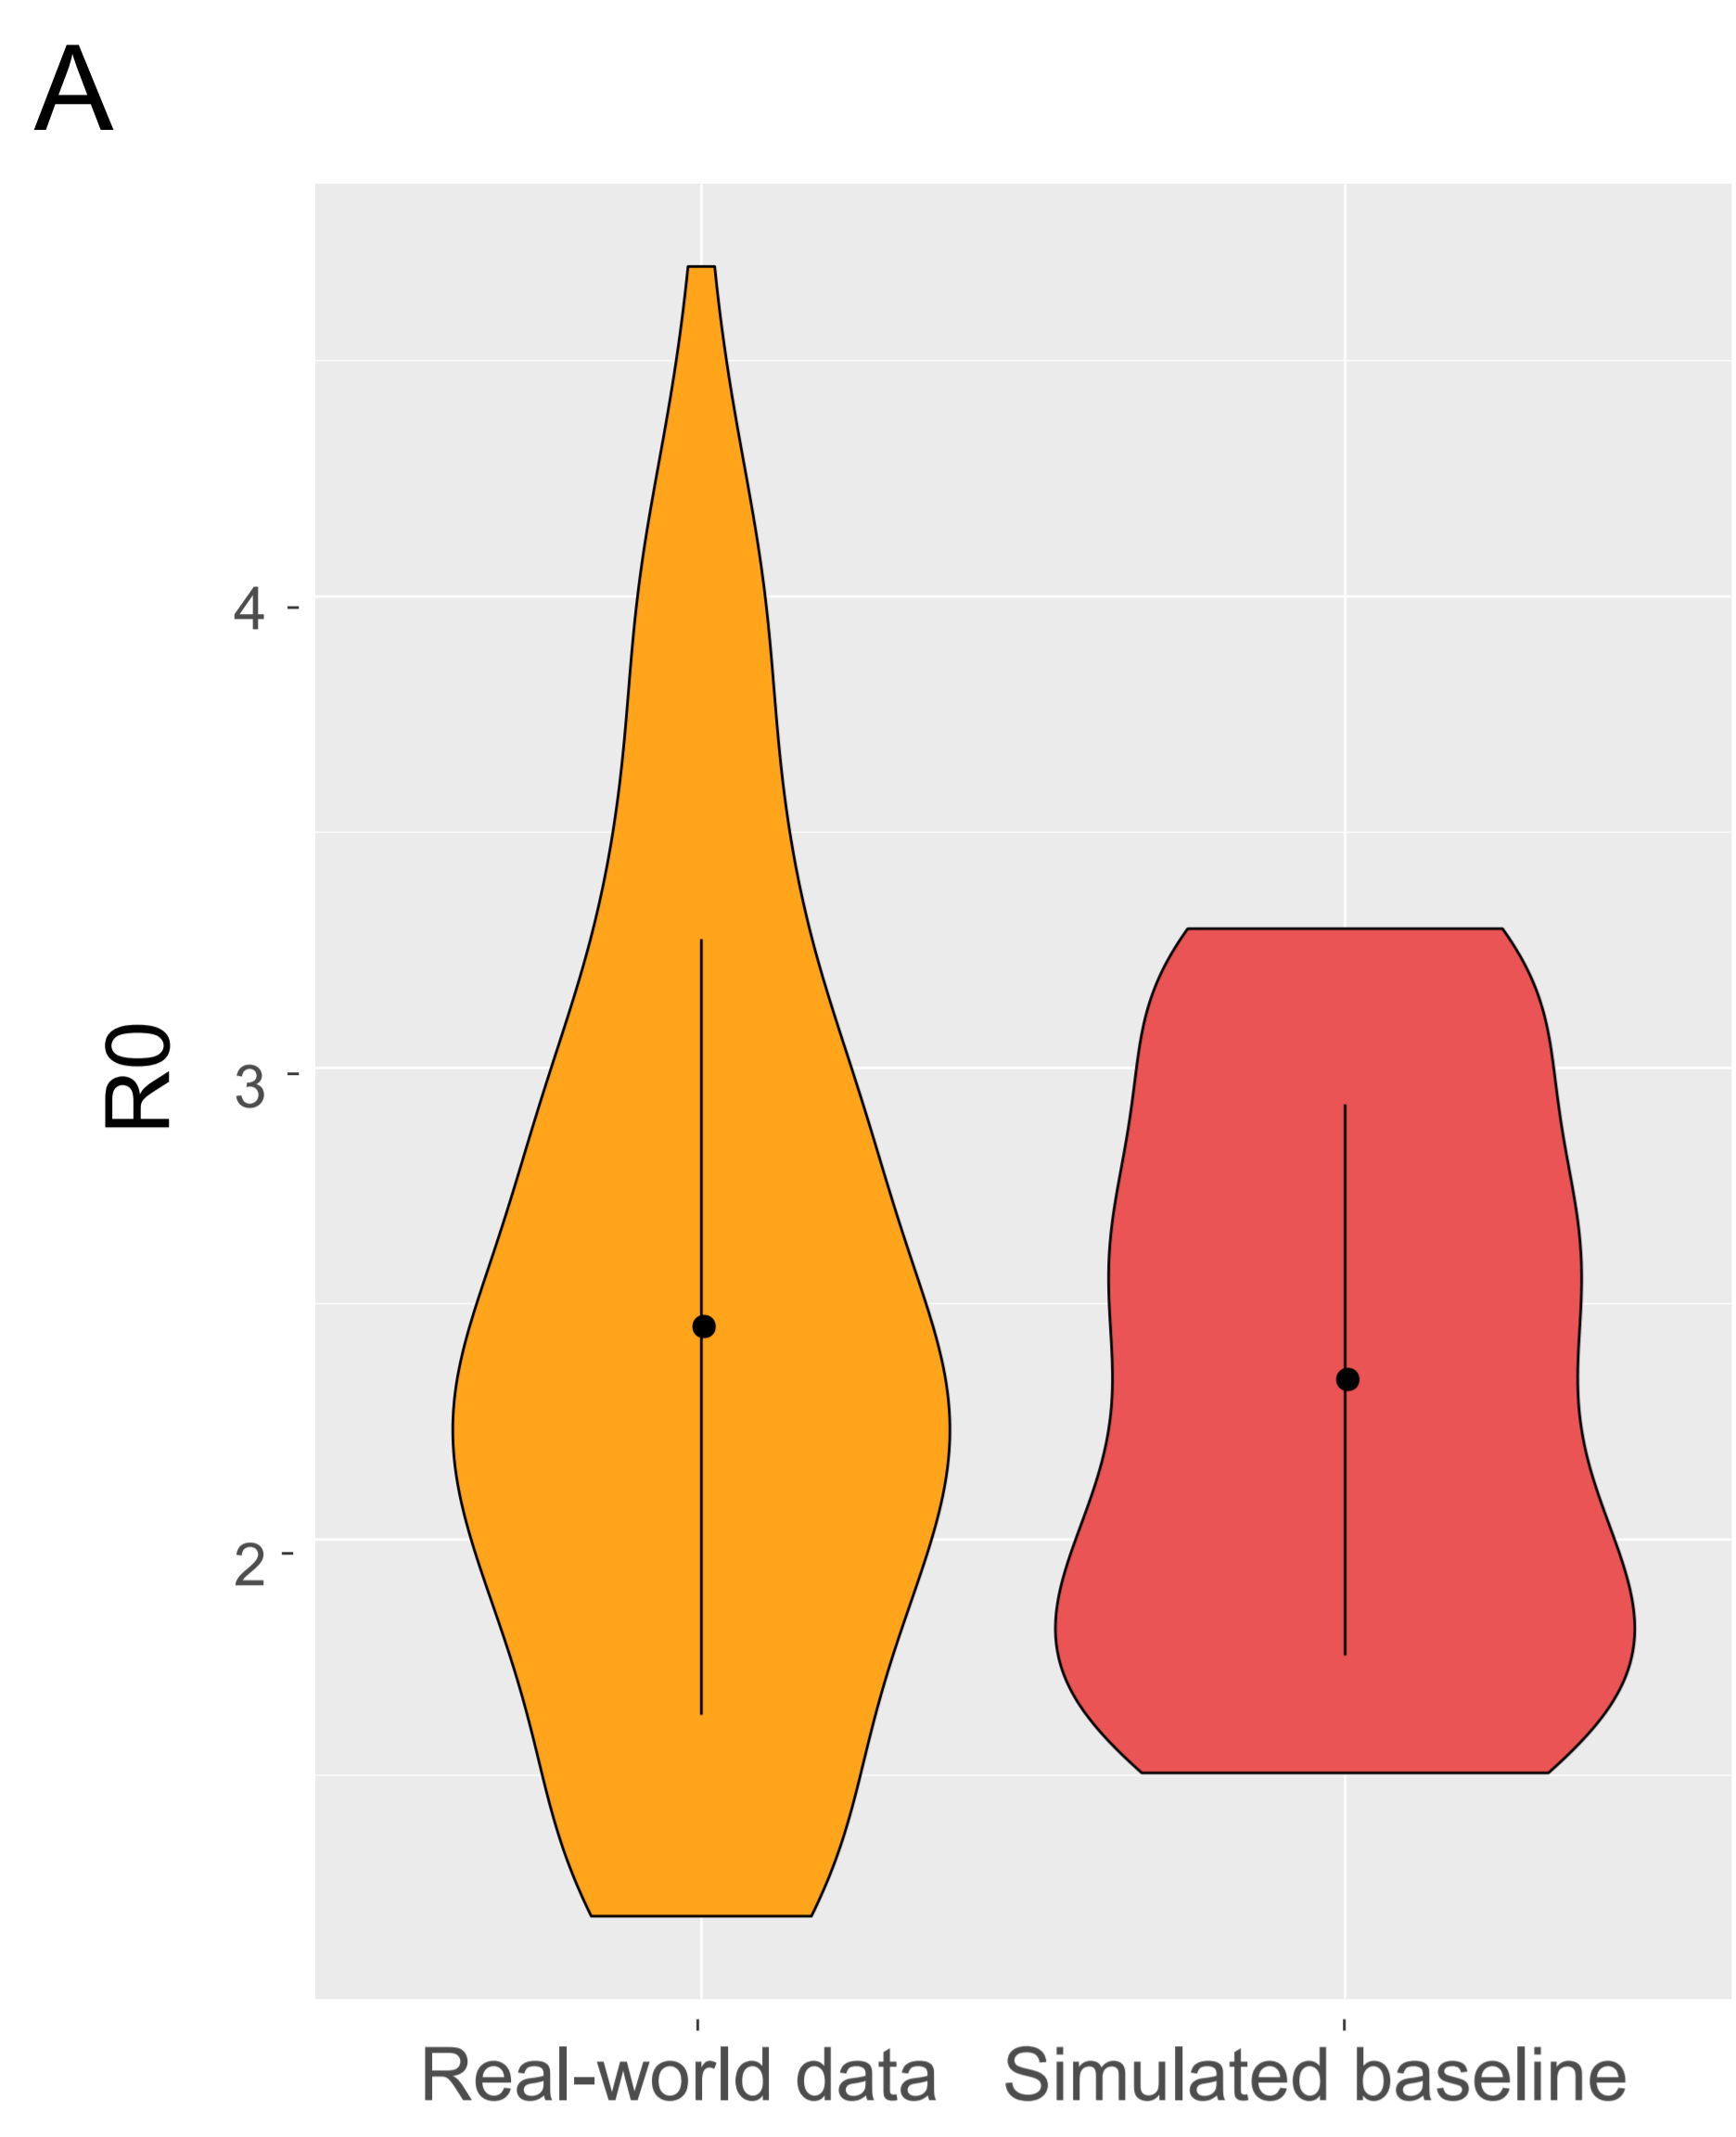

- B**
- Baseline
  - Testing and tracing contact with 2-week delay
  - Testing and tracing contact with 4-week delay
  - Testing symptomatic case only with 4-week delay

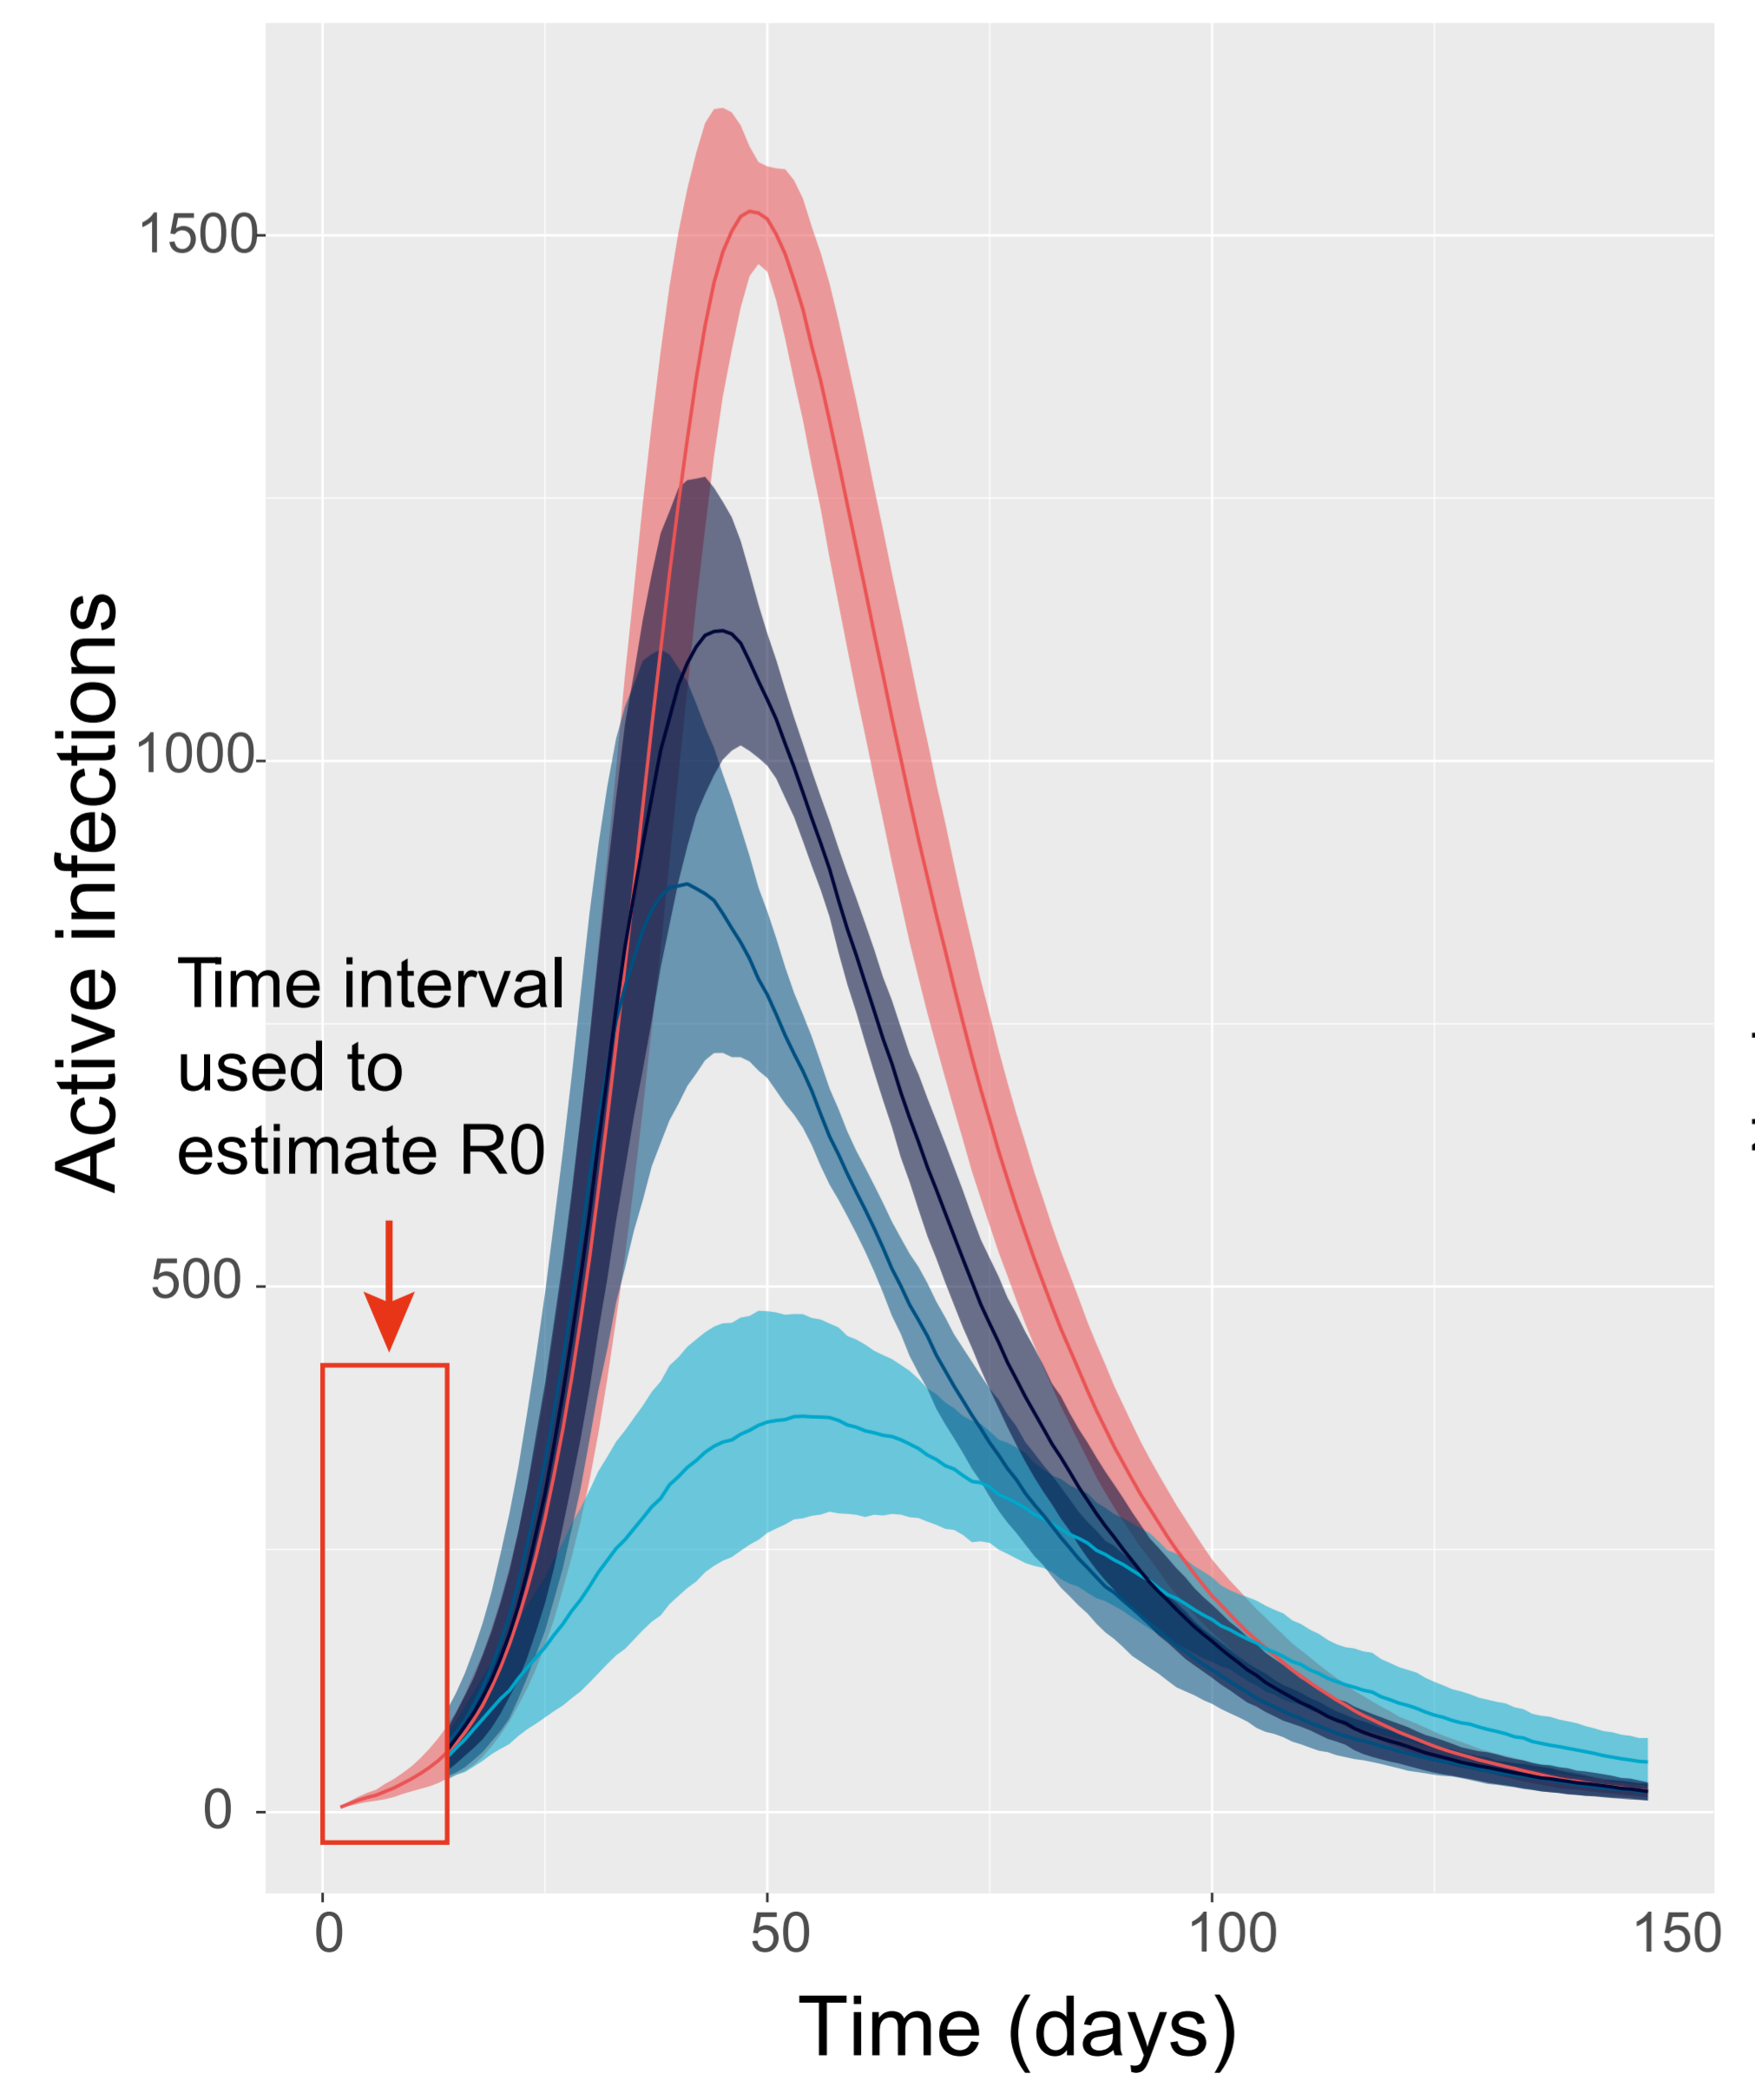

**C** Testing symptomatic case only with 4-week delay

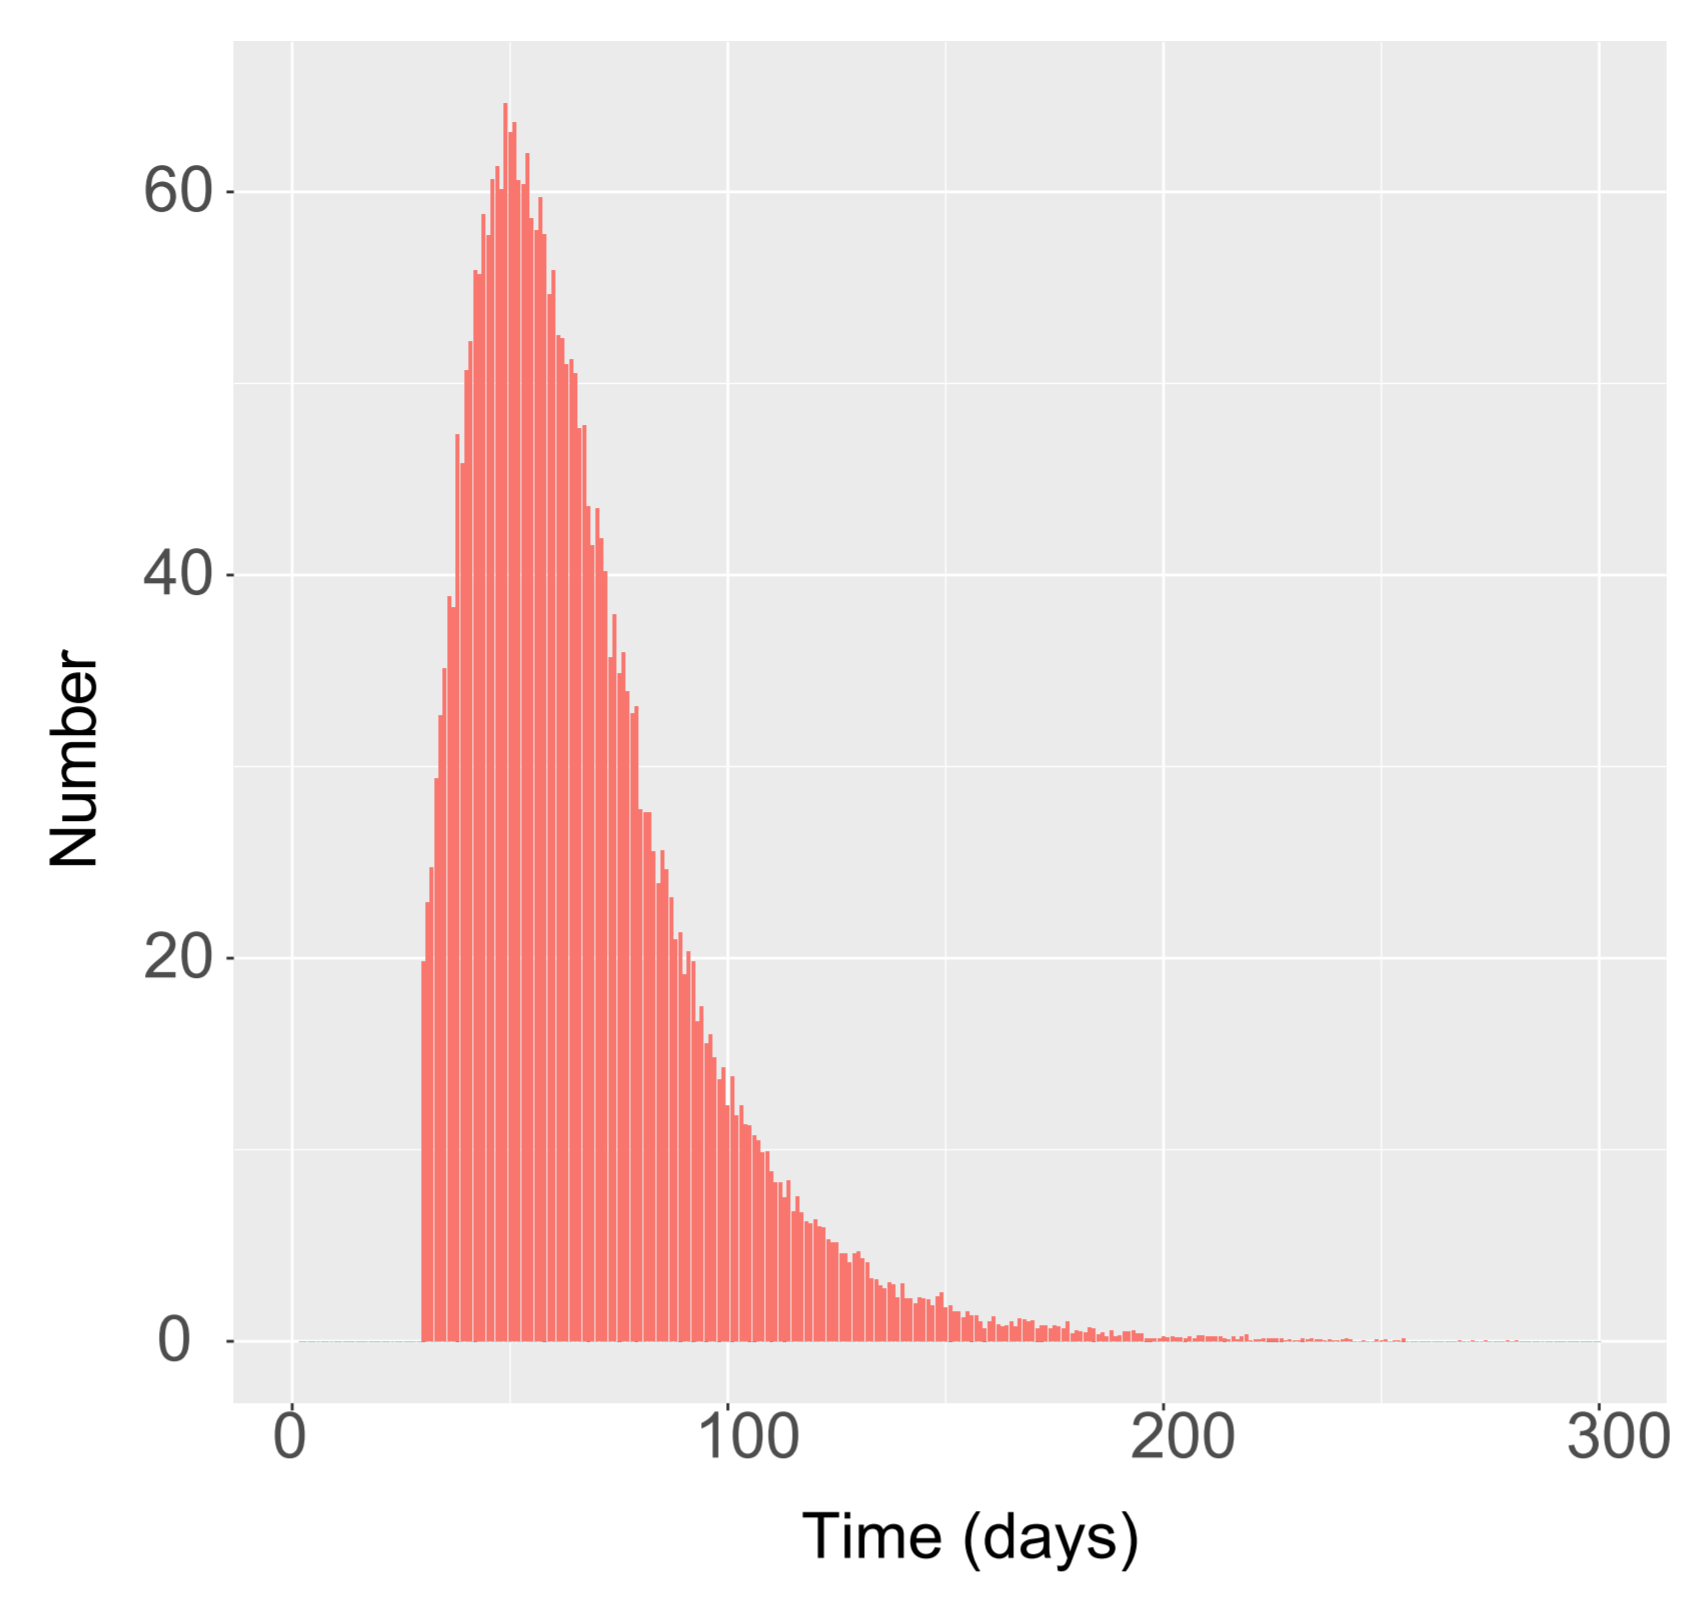

Testing and tracing contact with 4-week delay

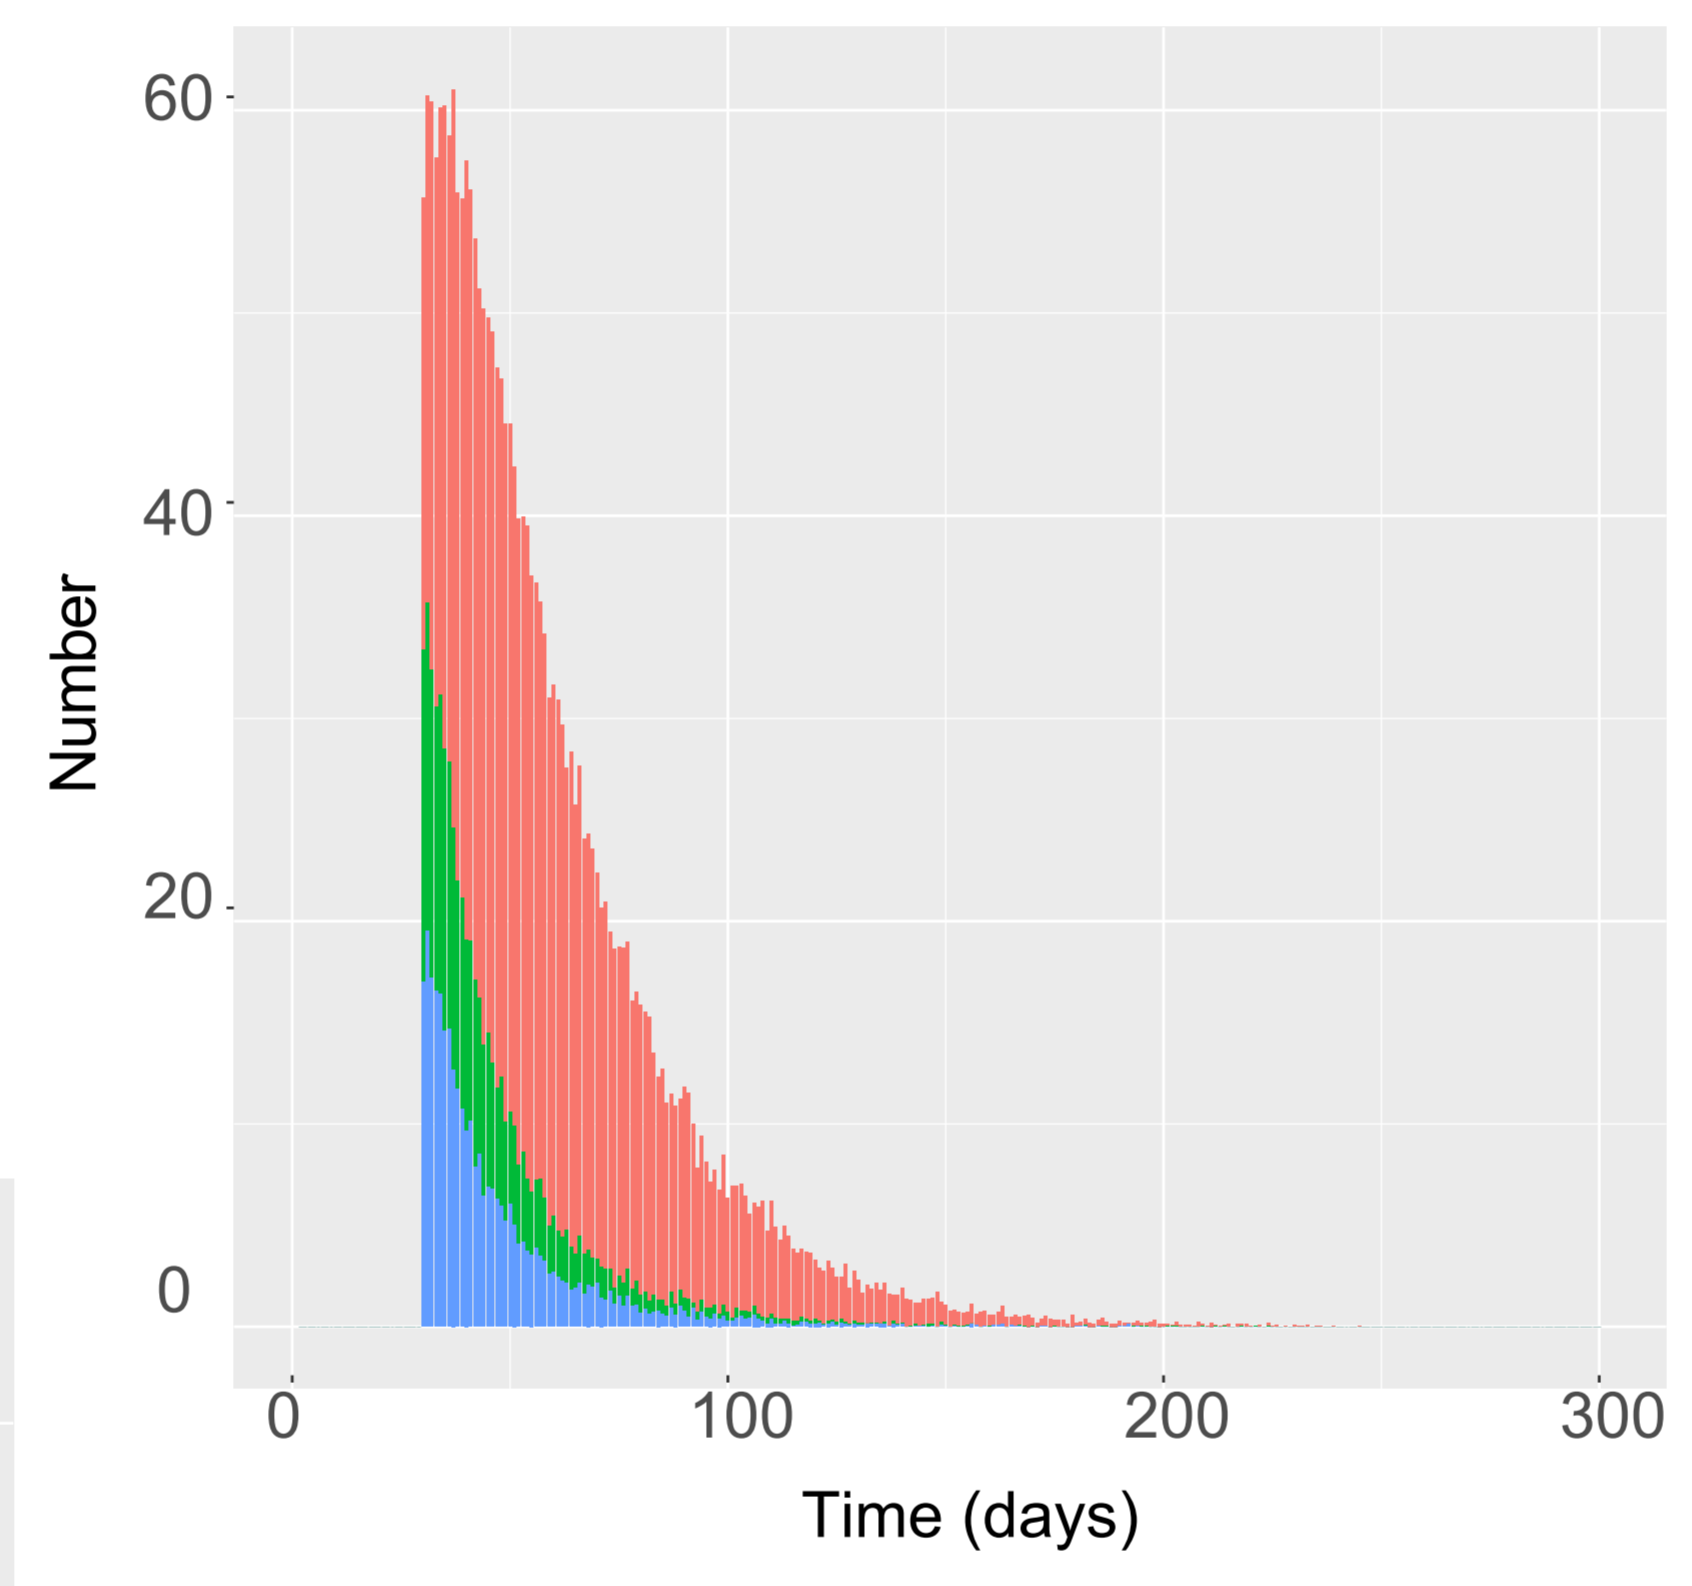

Testing and tracing contact with 2-week delay

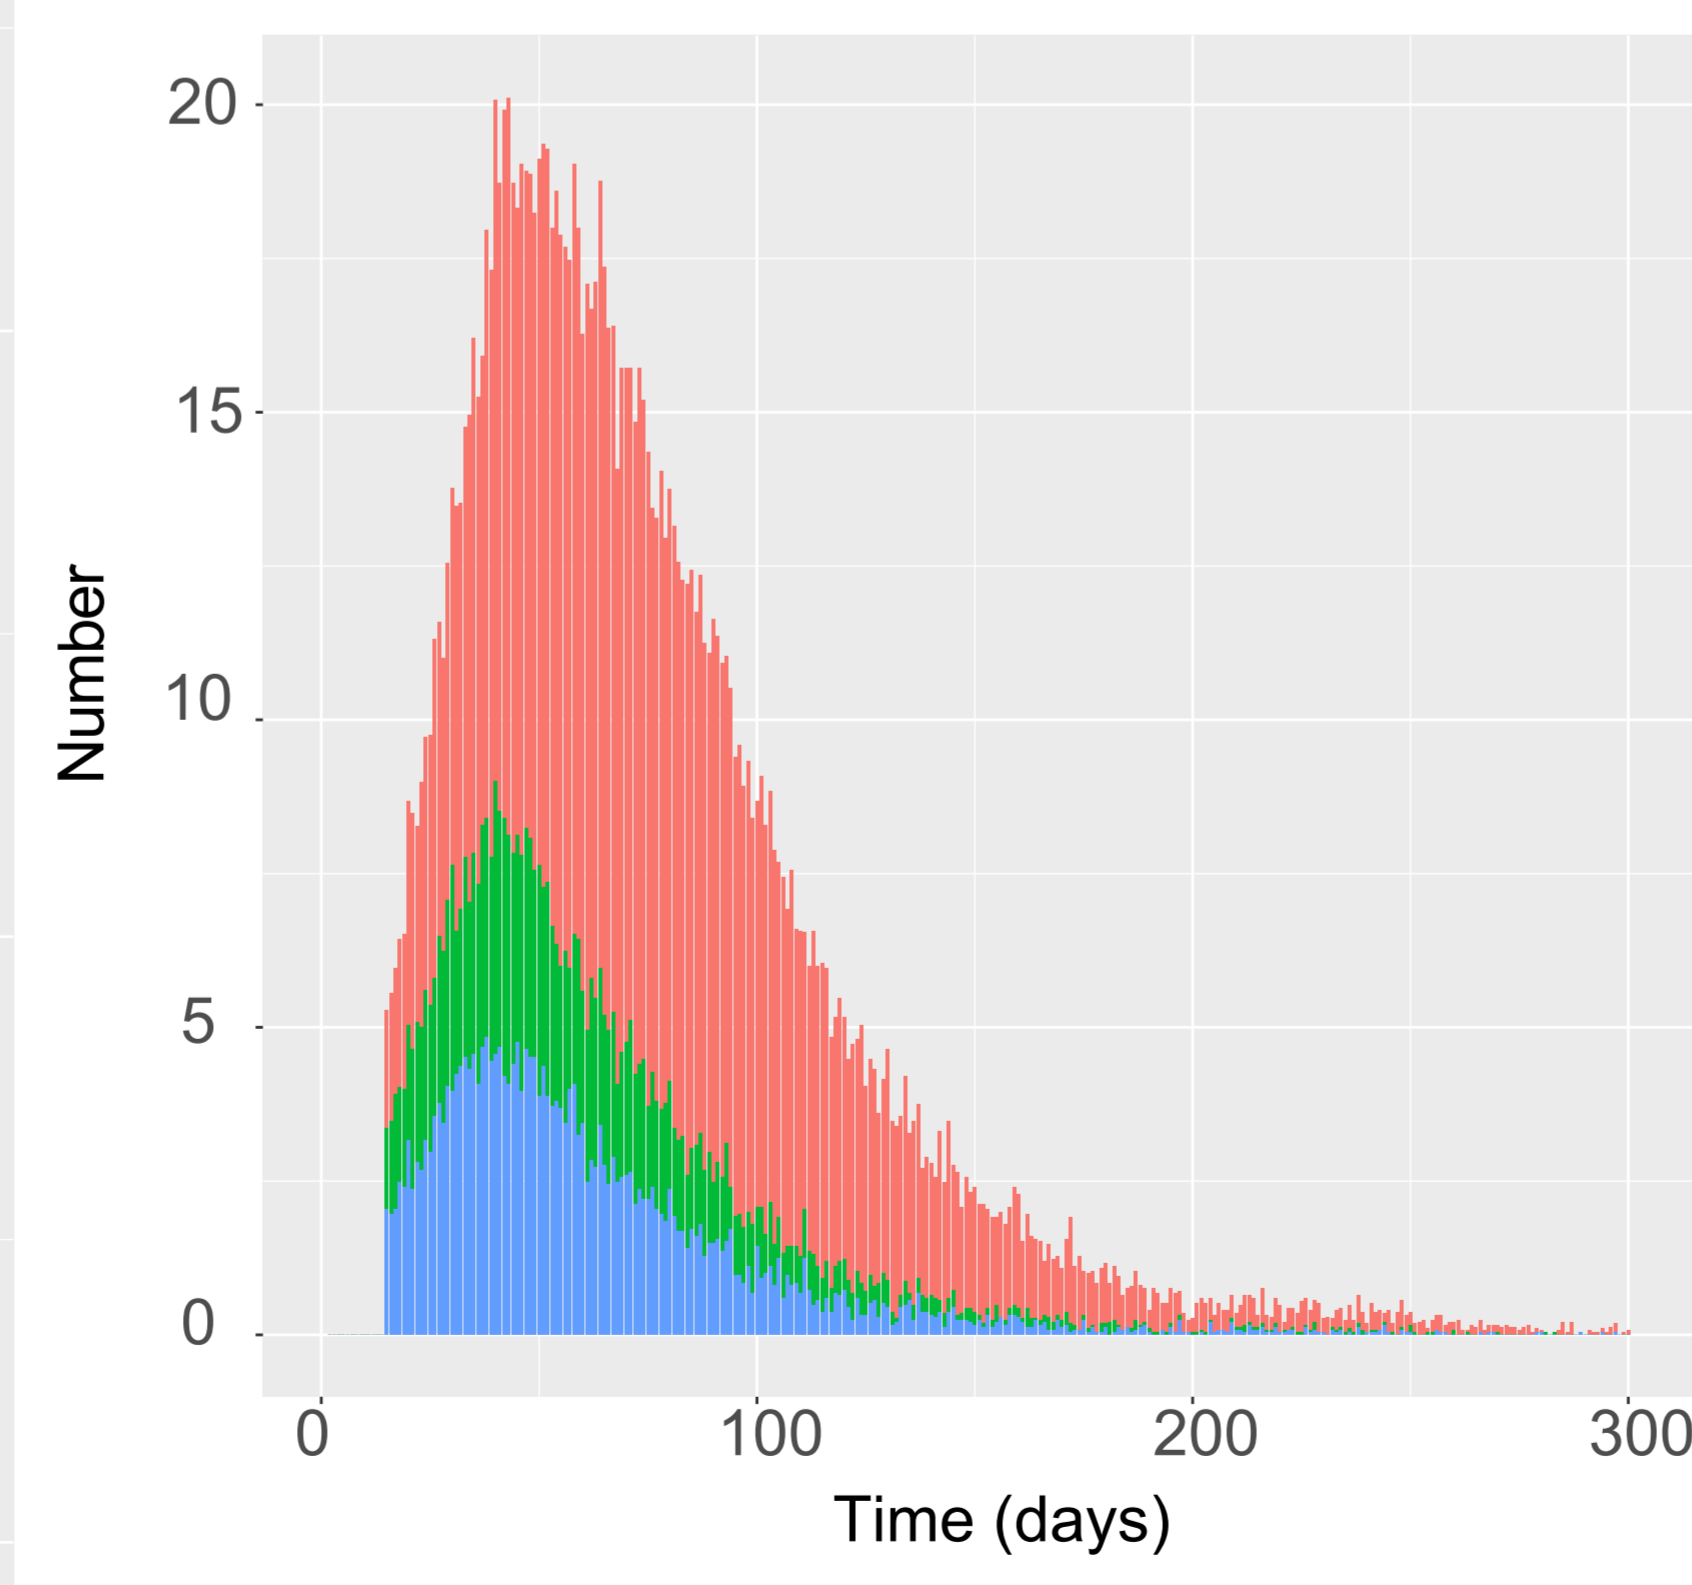

- Is in daily new confirmed cases
- I in daily new confirmed cases
- E in daily new confirmed cases

**D** Baseline

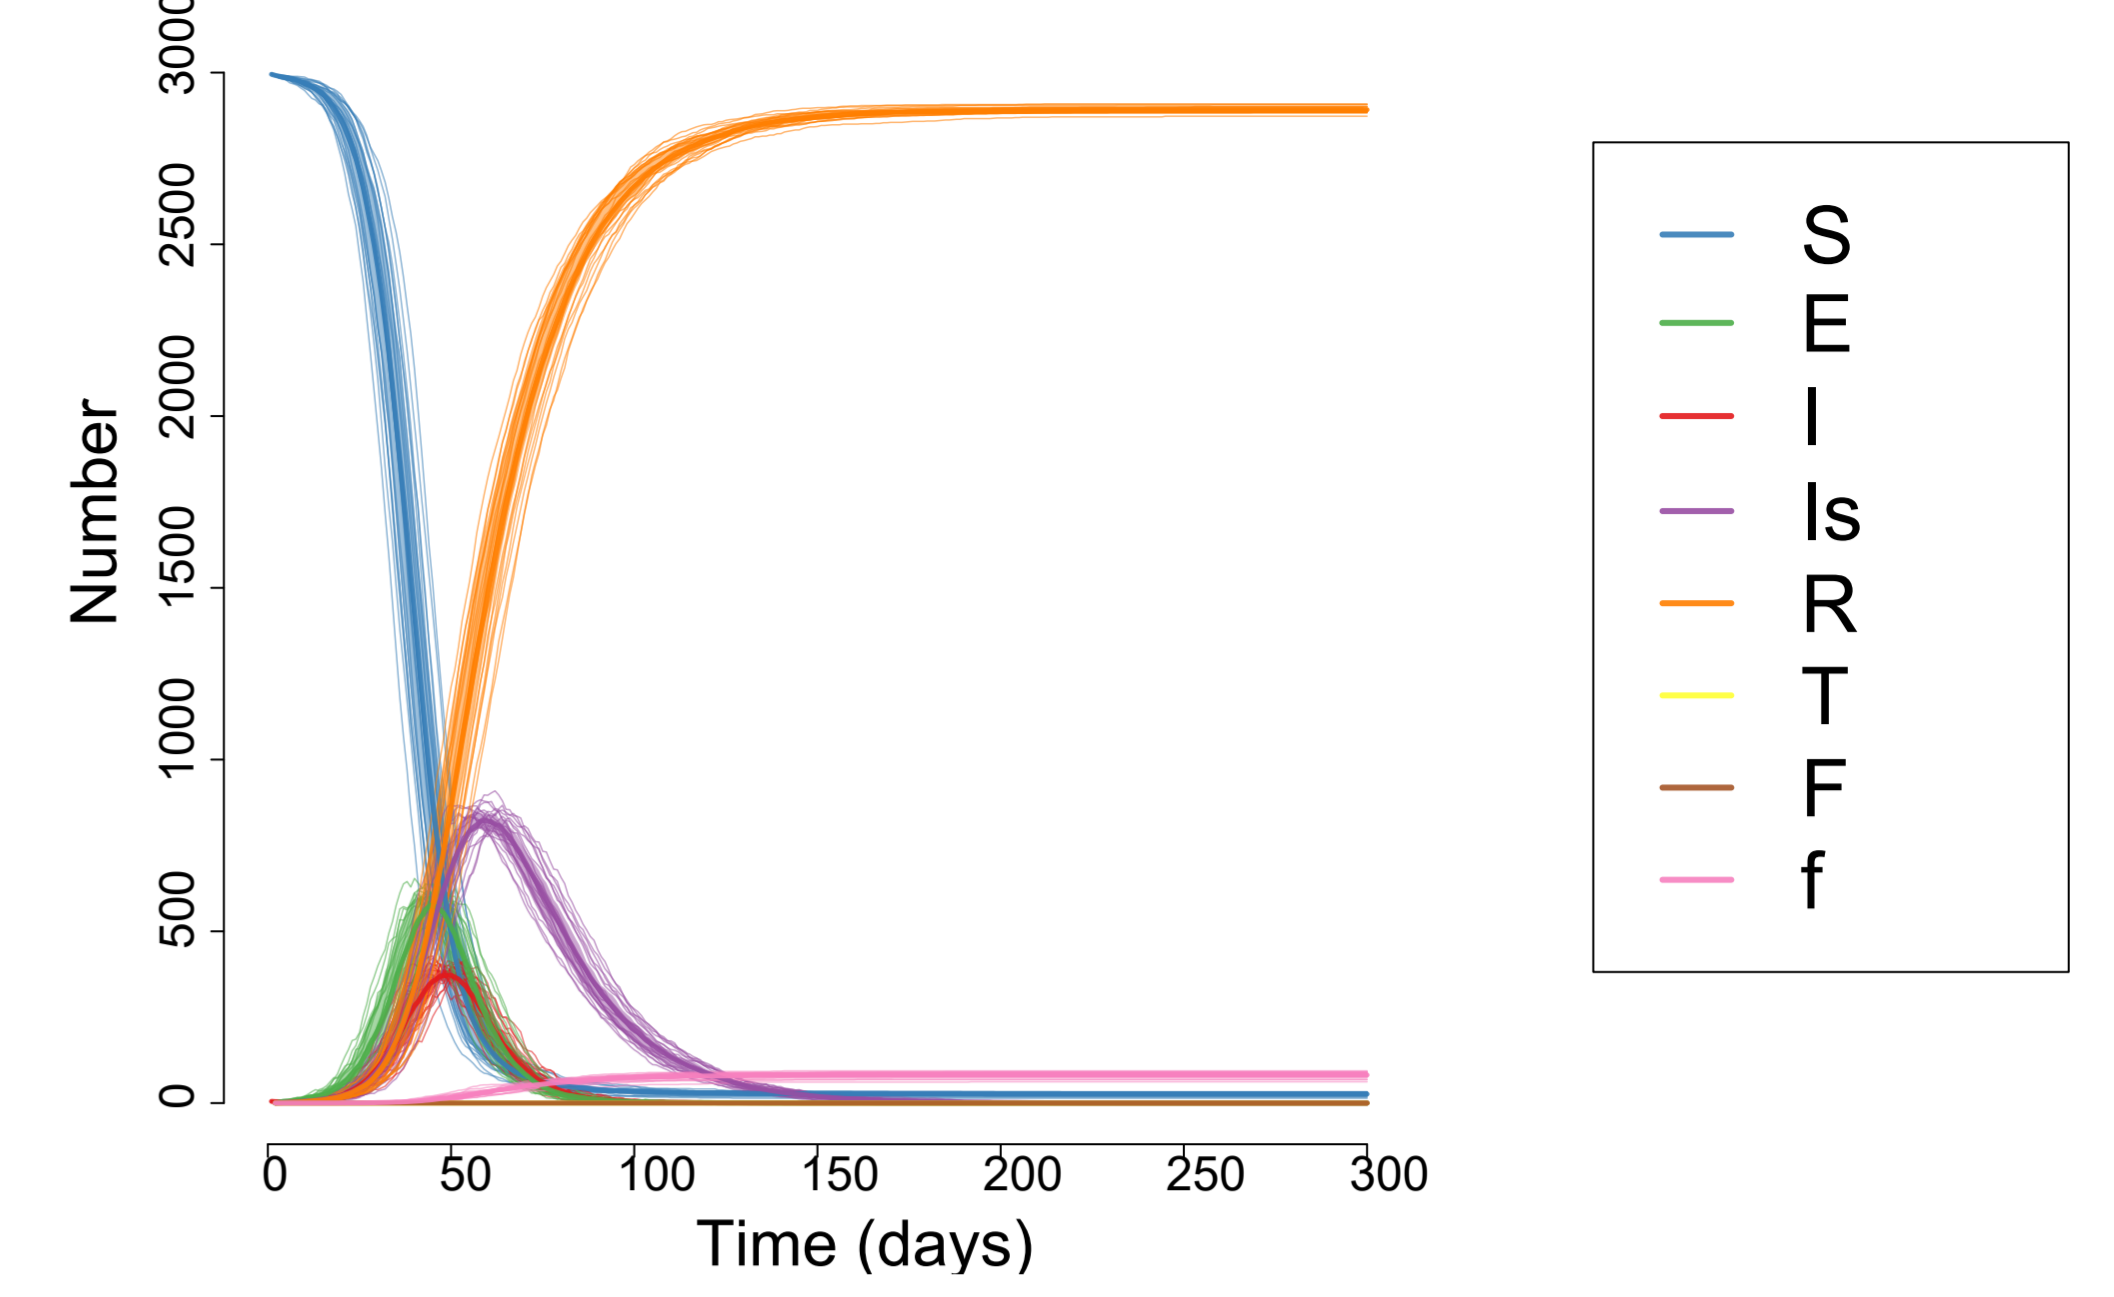

Testing symptomatic case only with 4-week delay

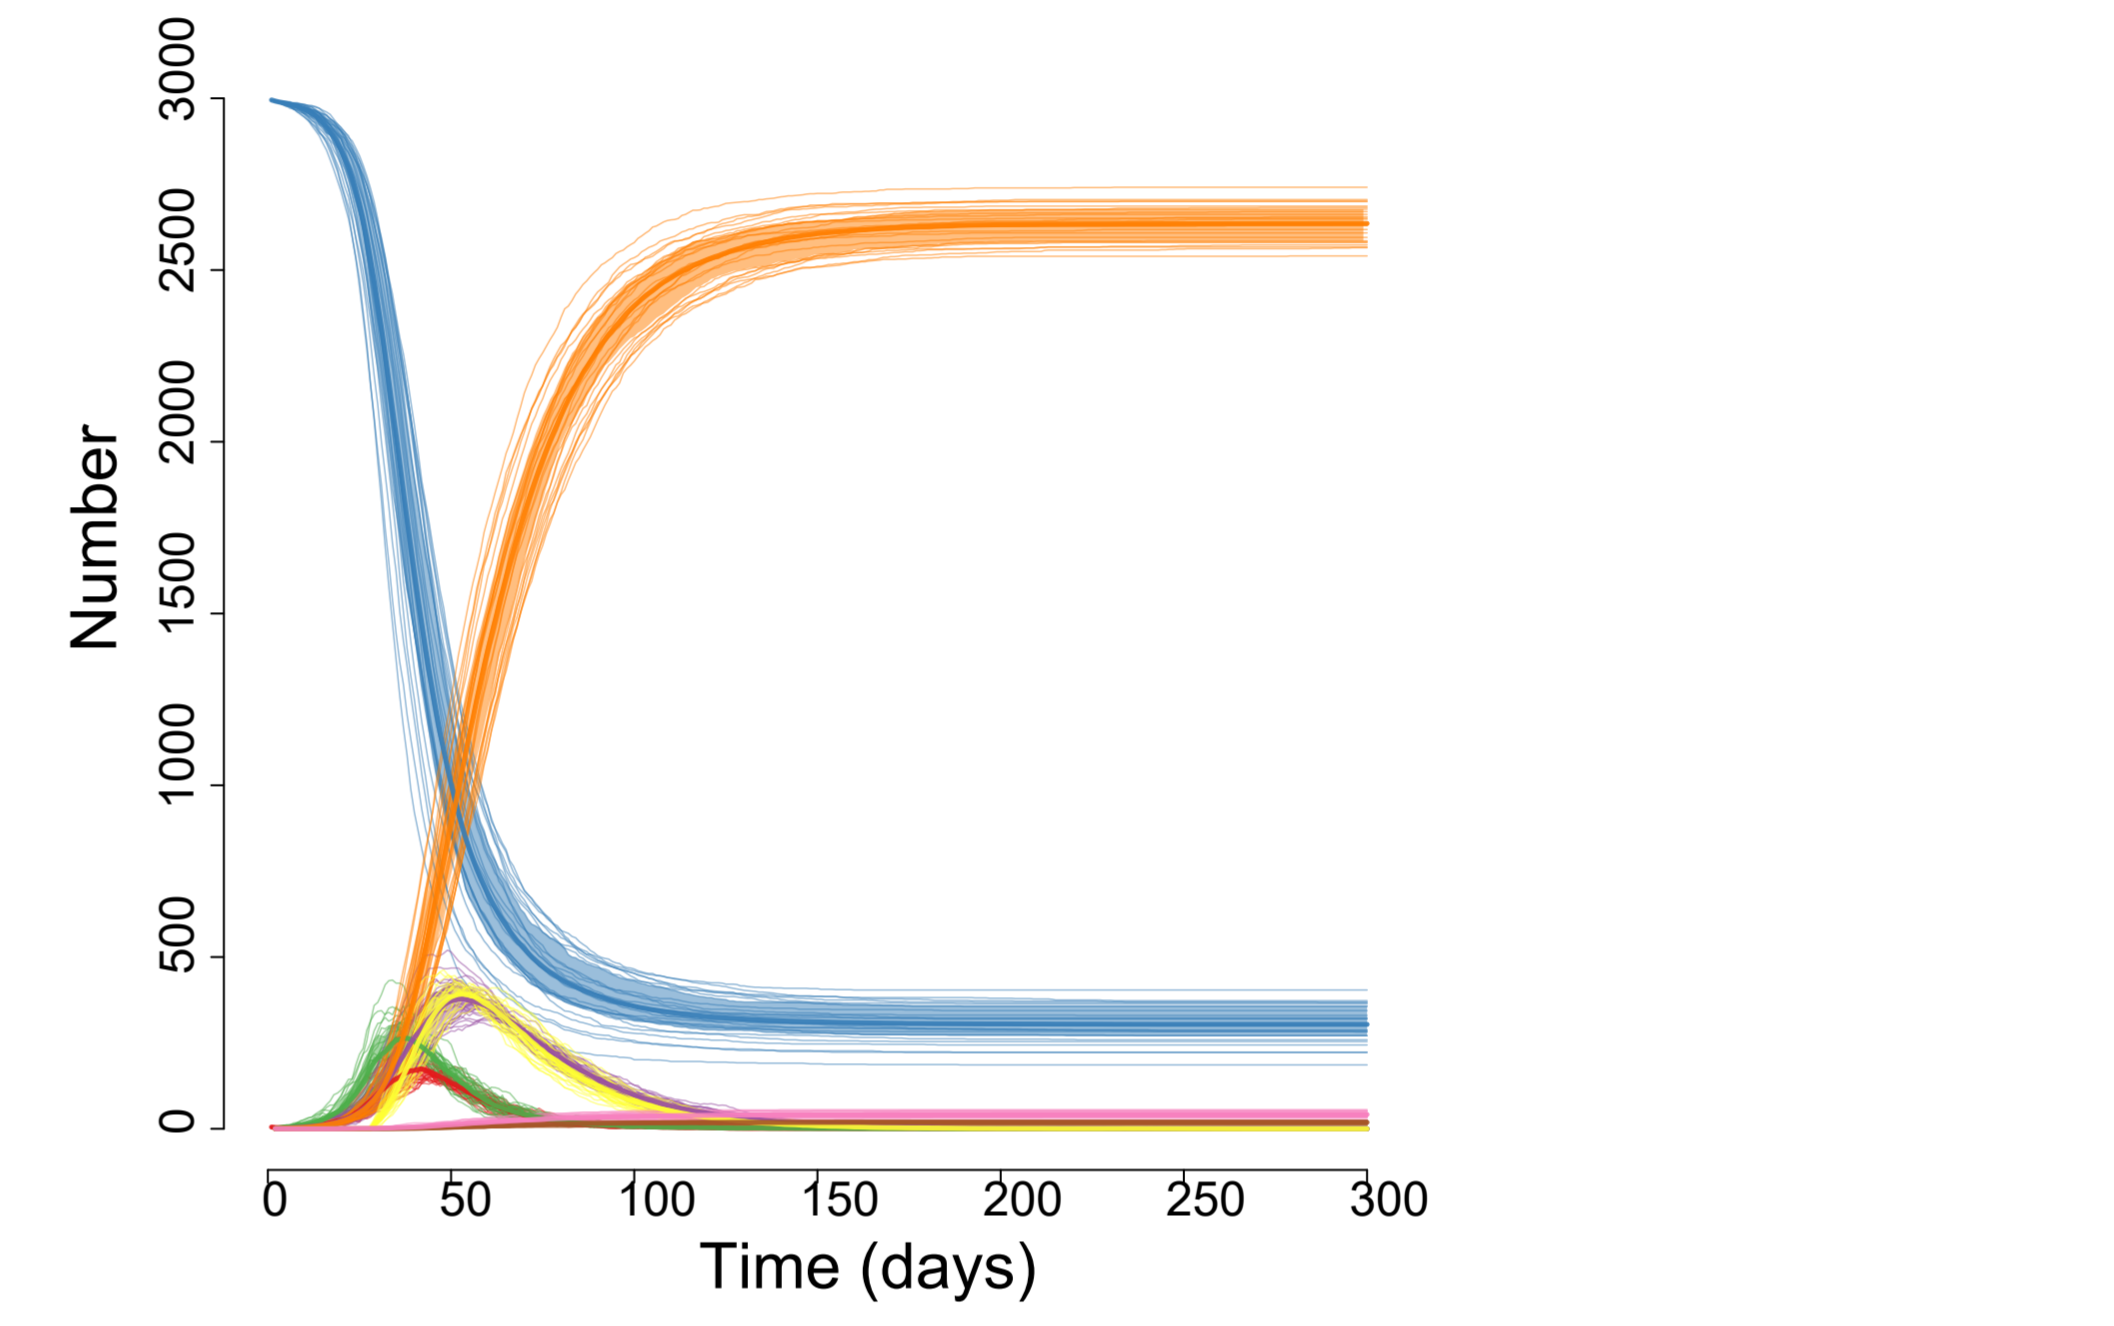

Testing and tracing contact with 4-week delay

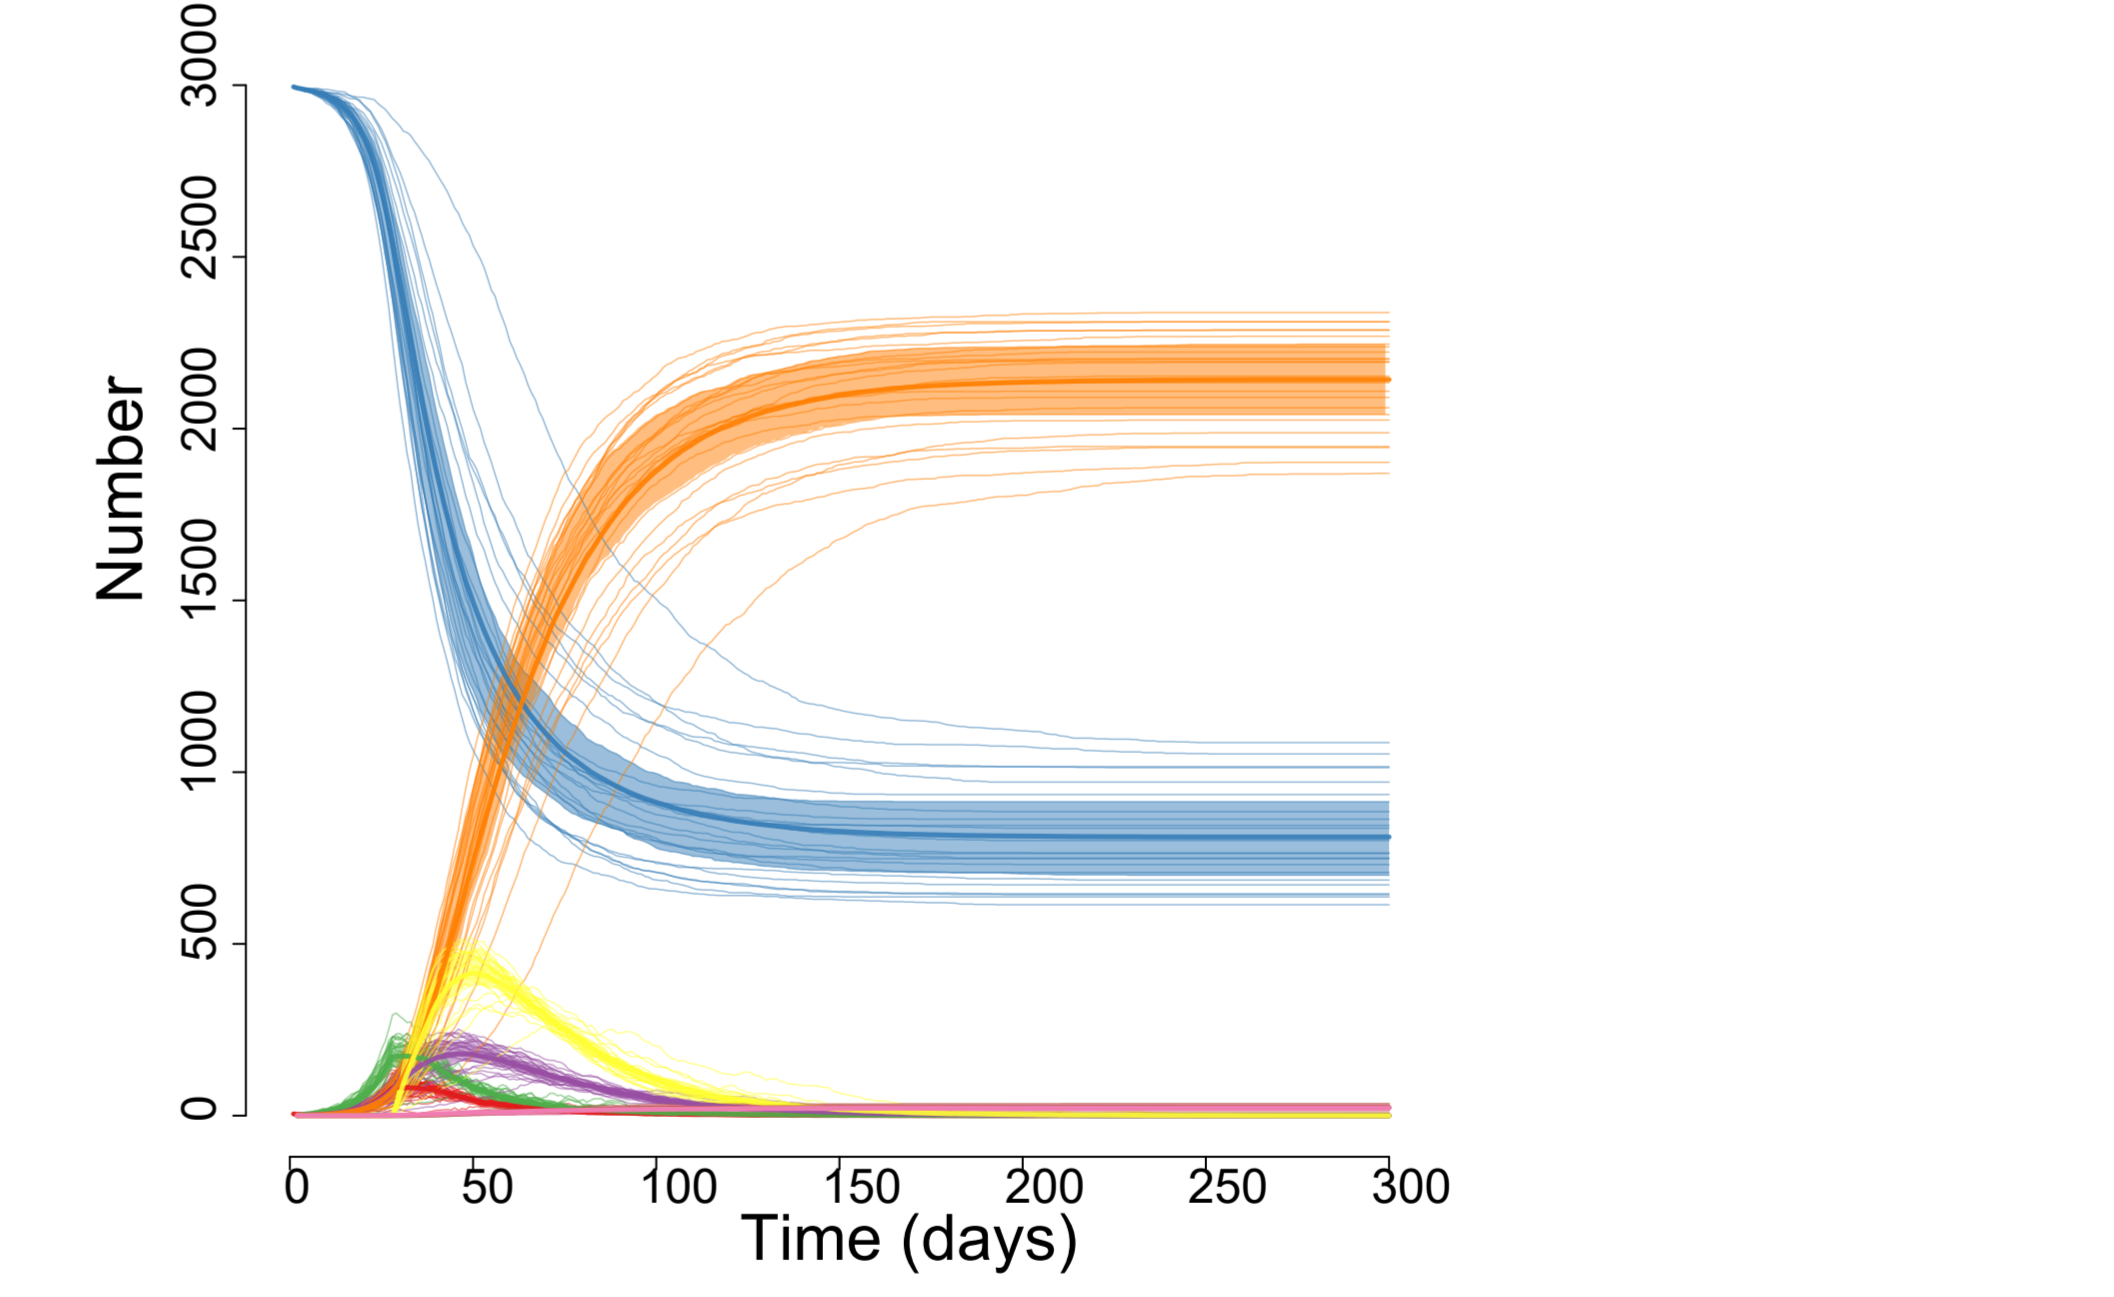

Testing and tracing contact with 2-week delay

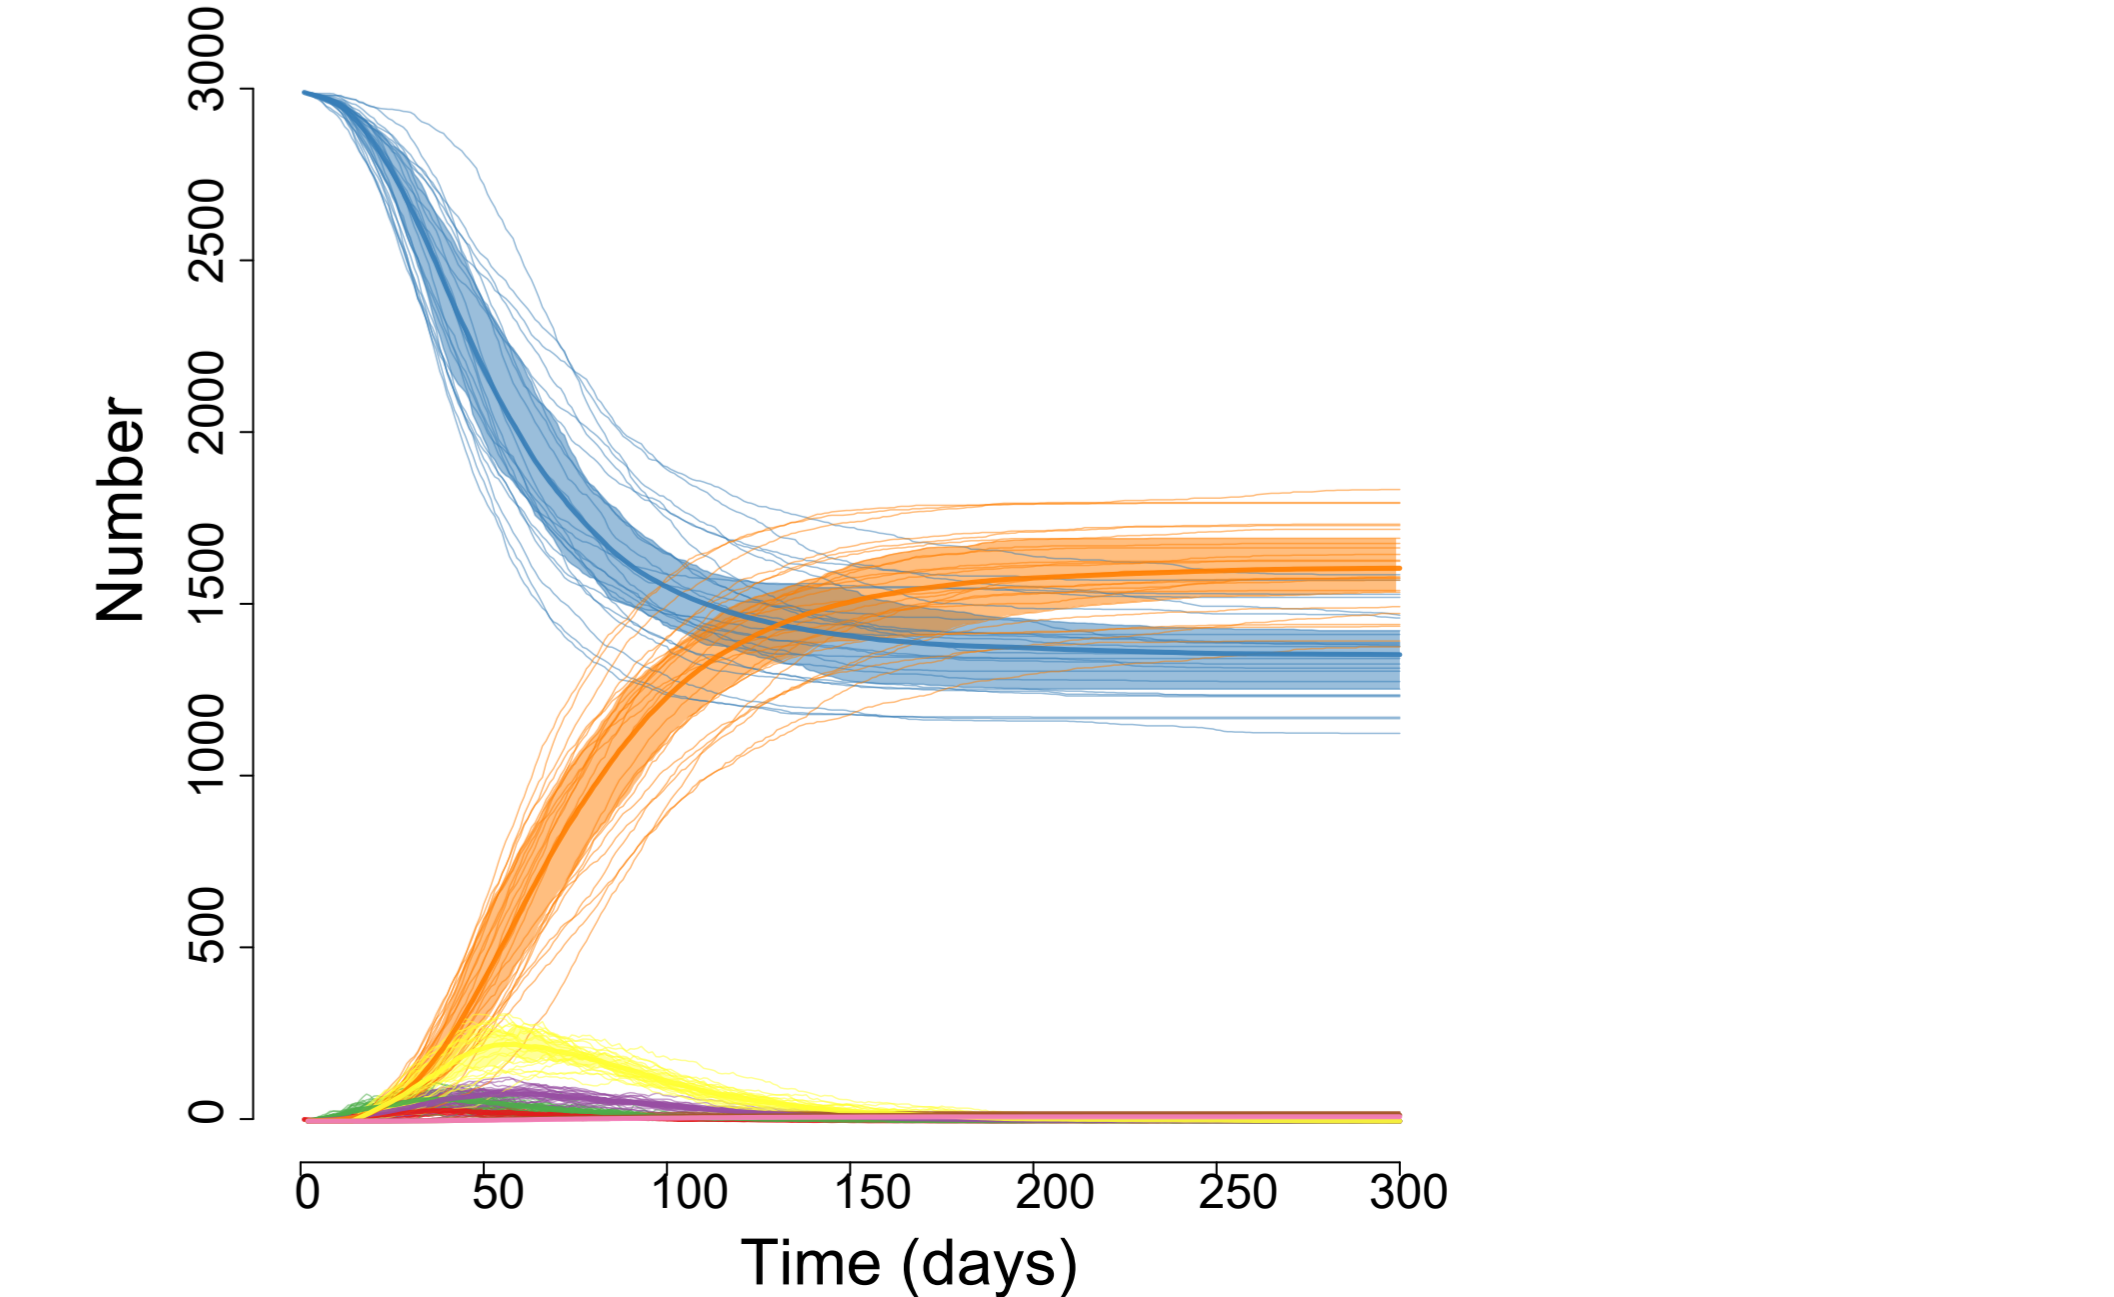

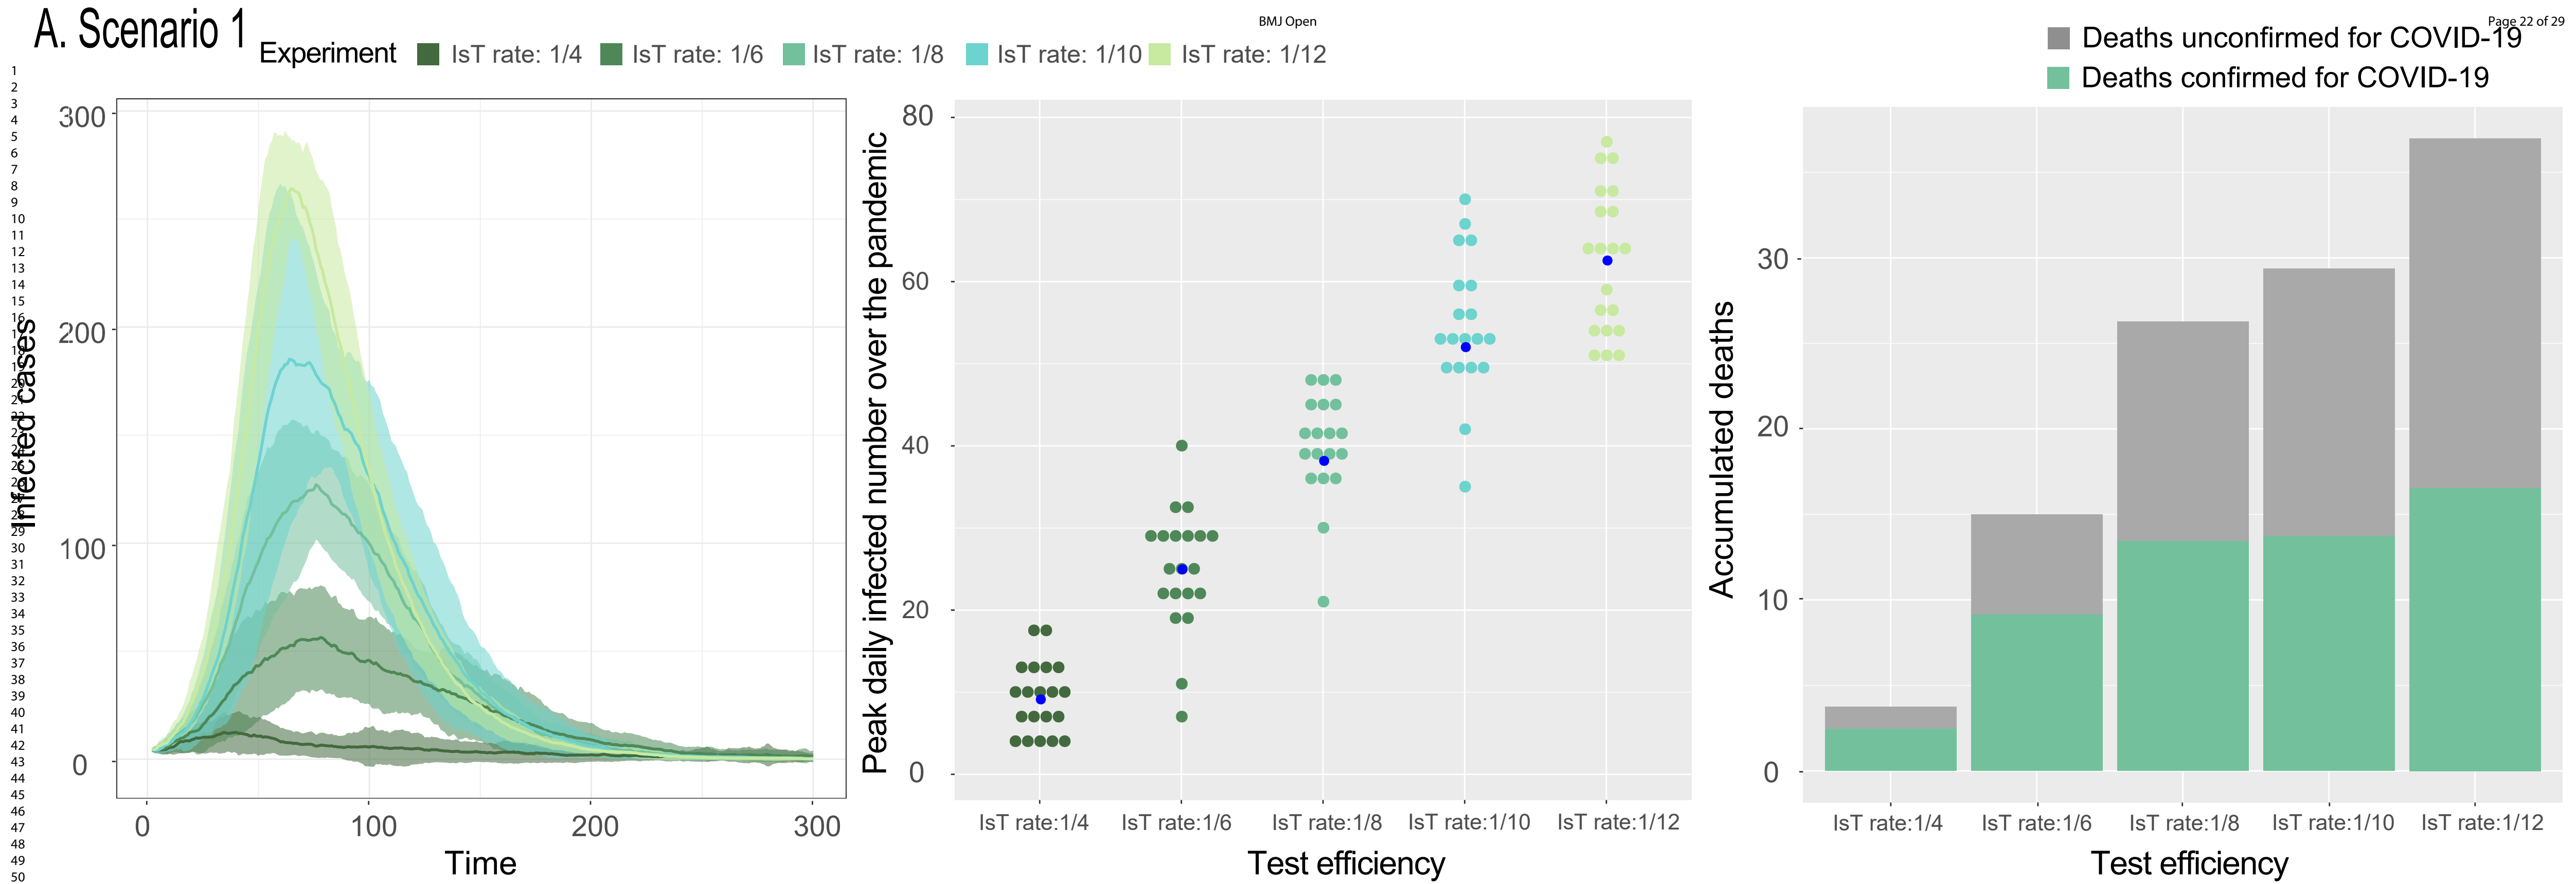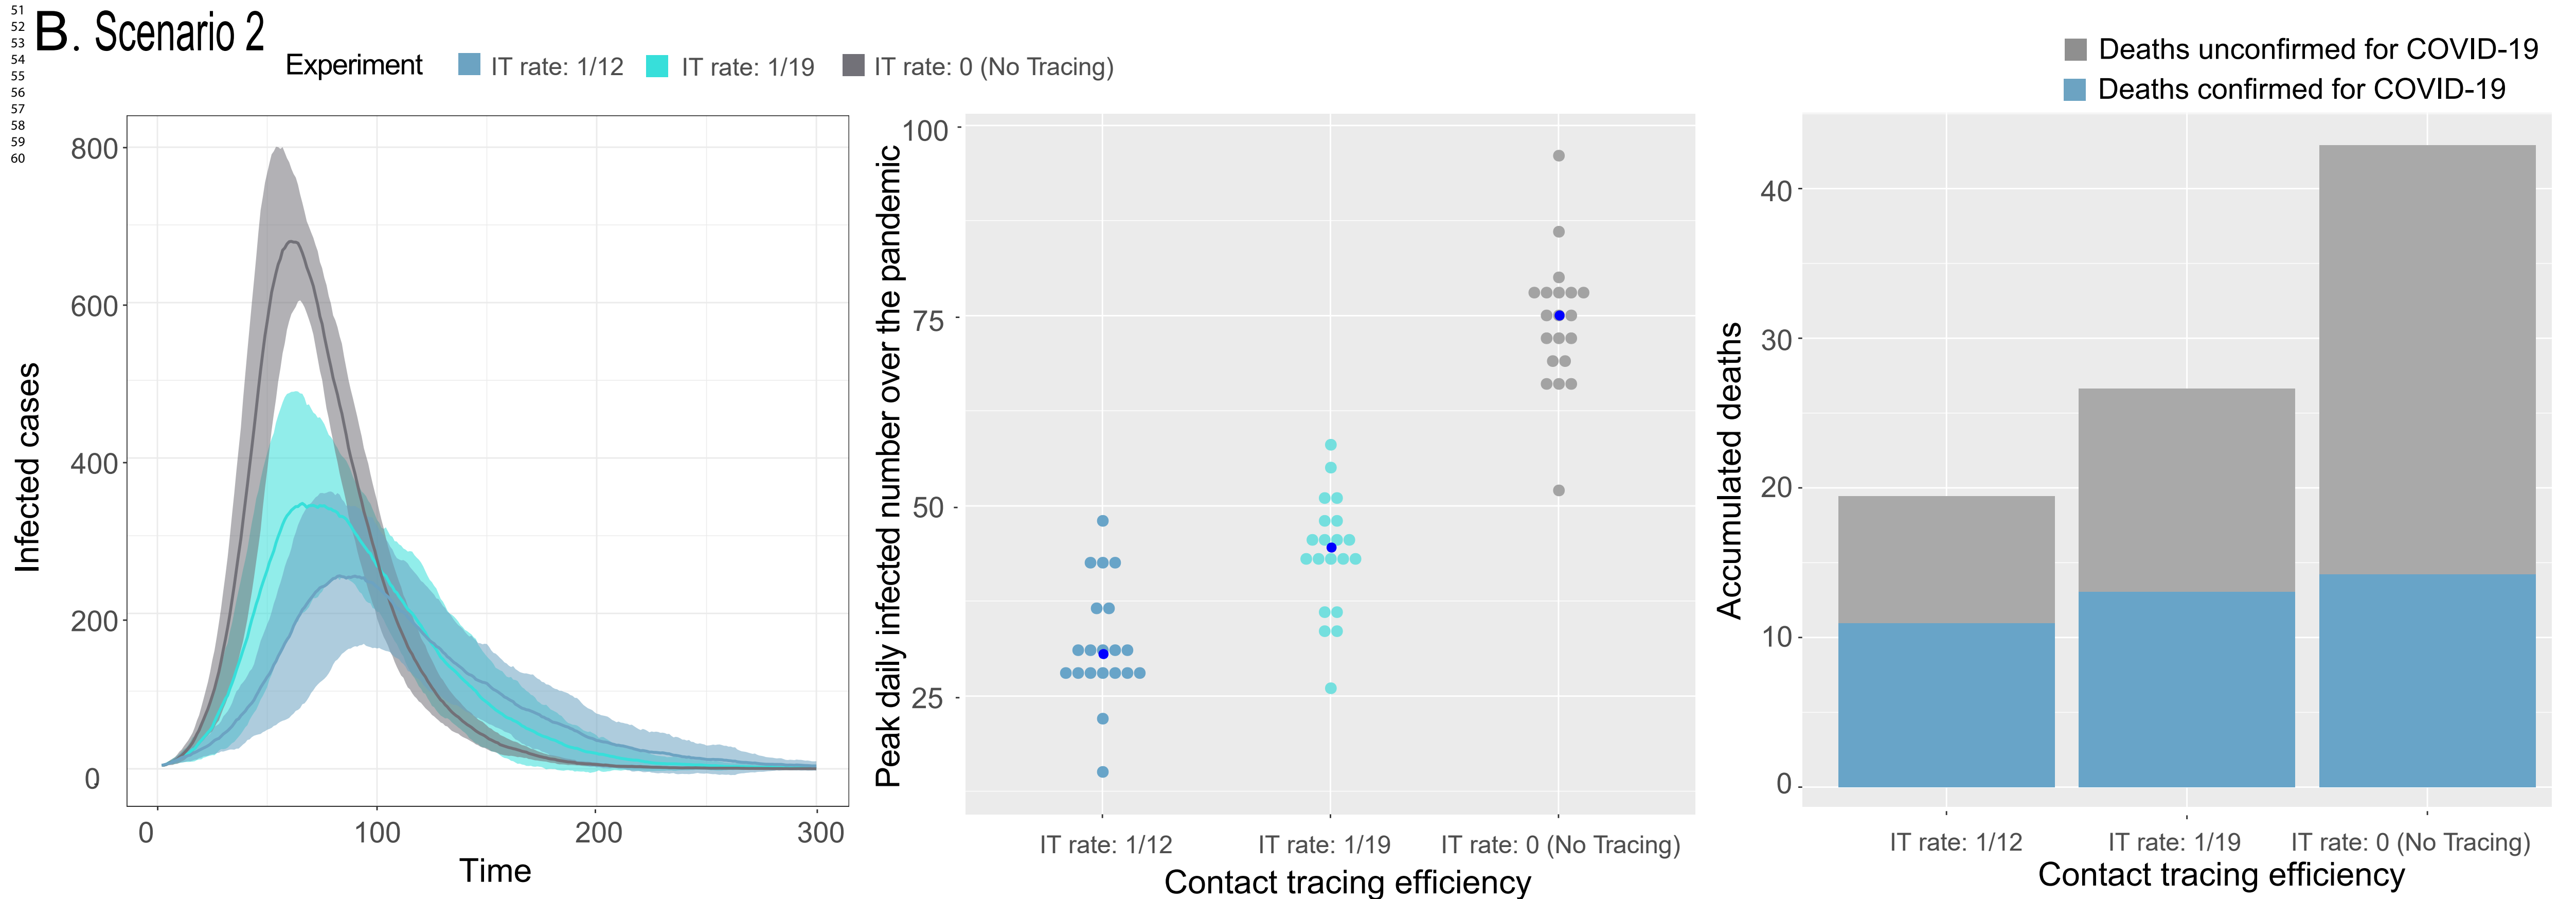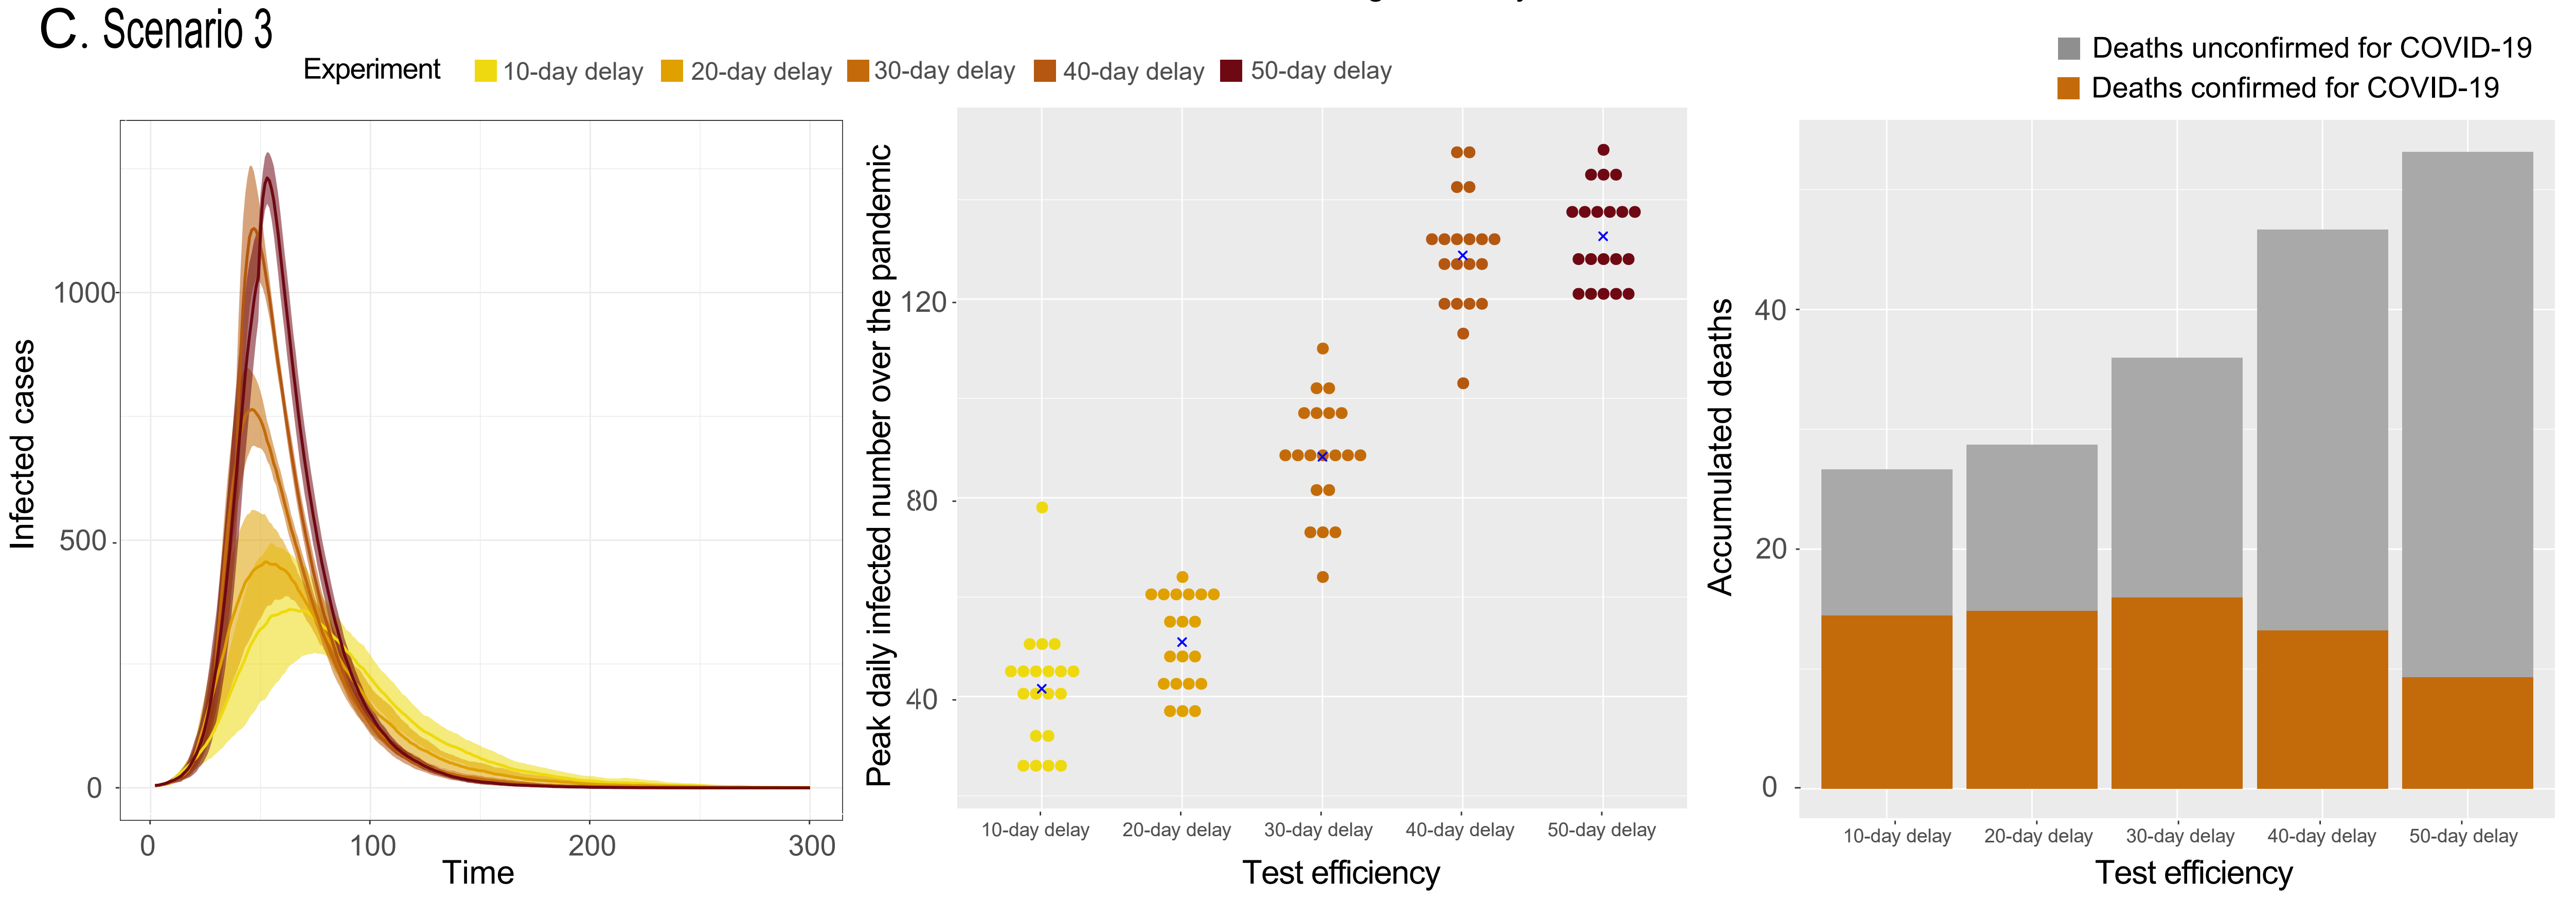

A

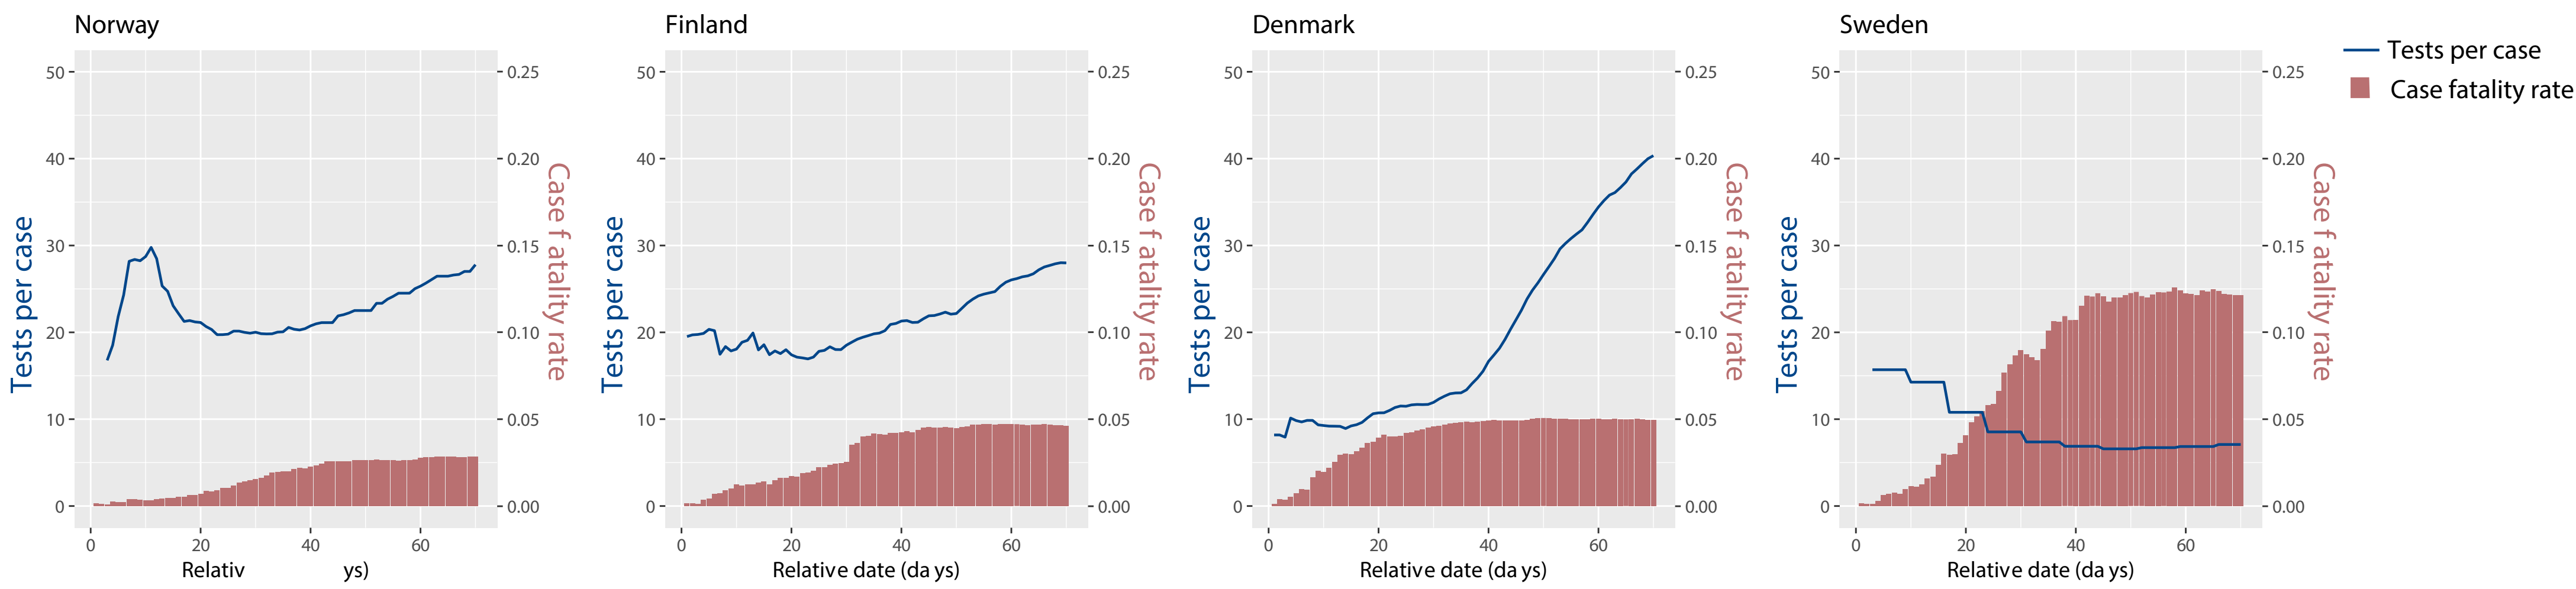

B

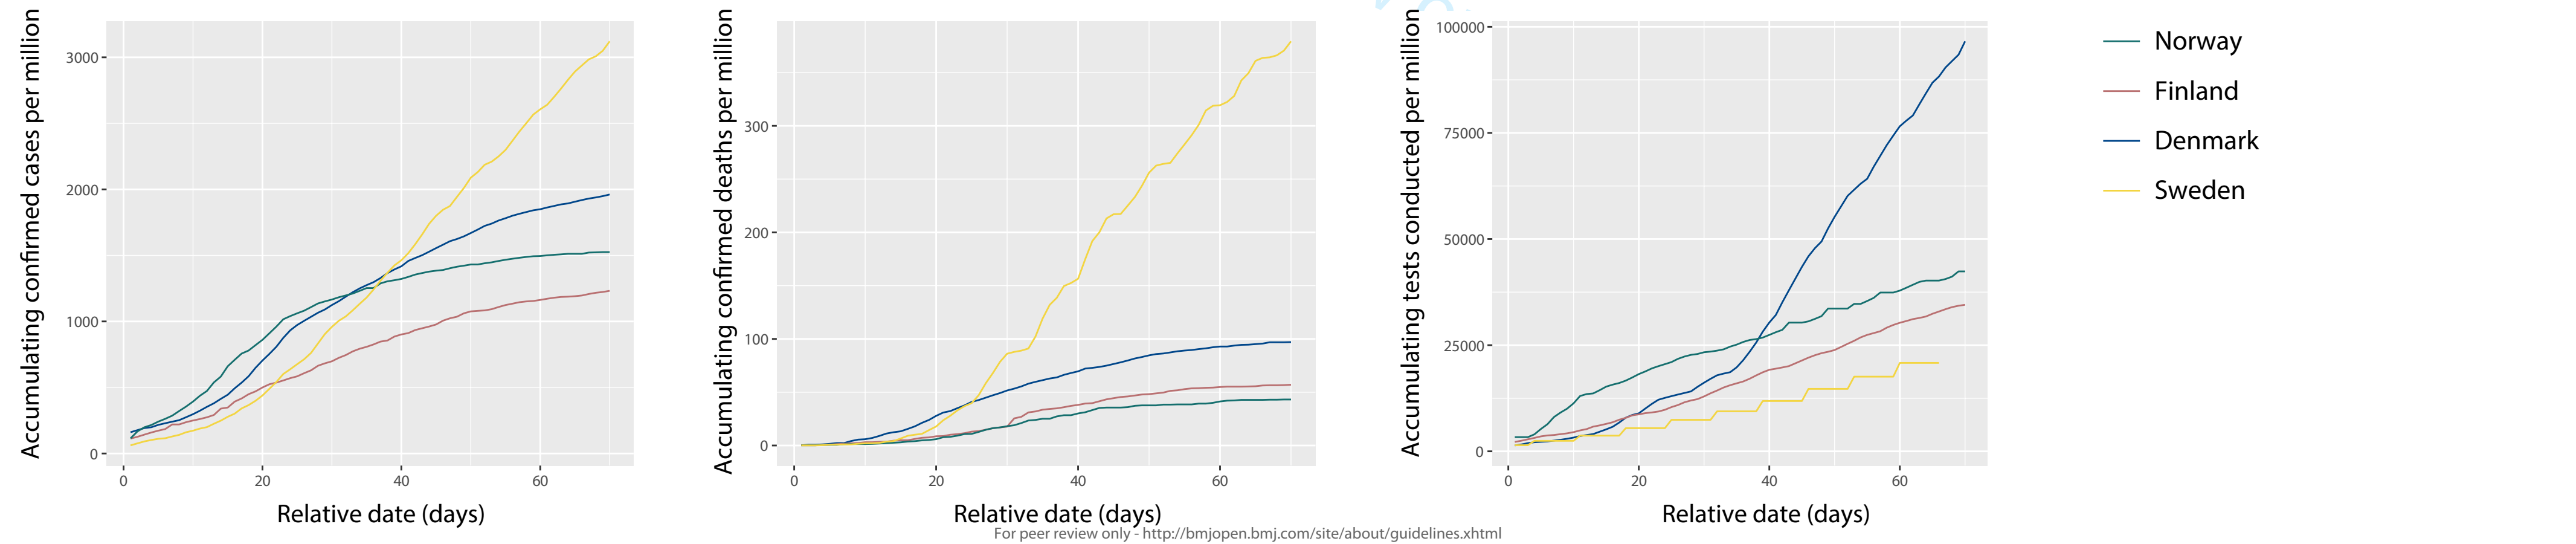

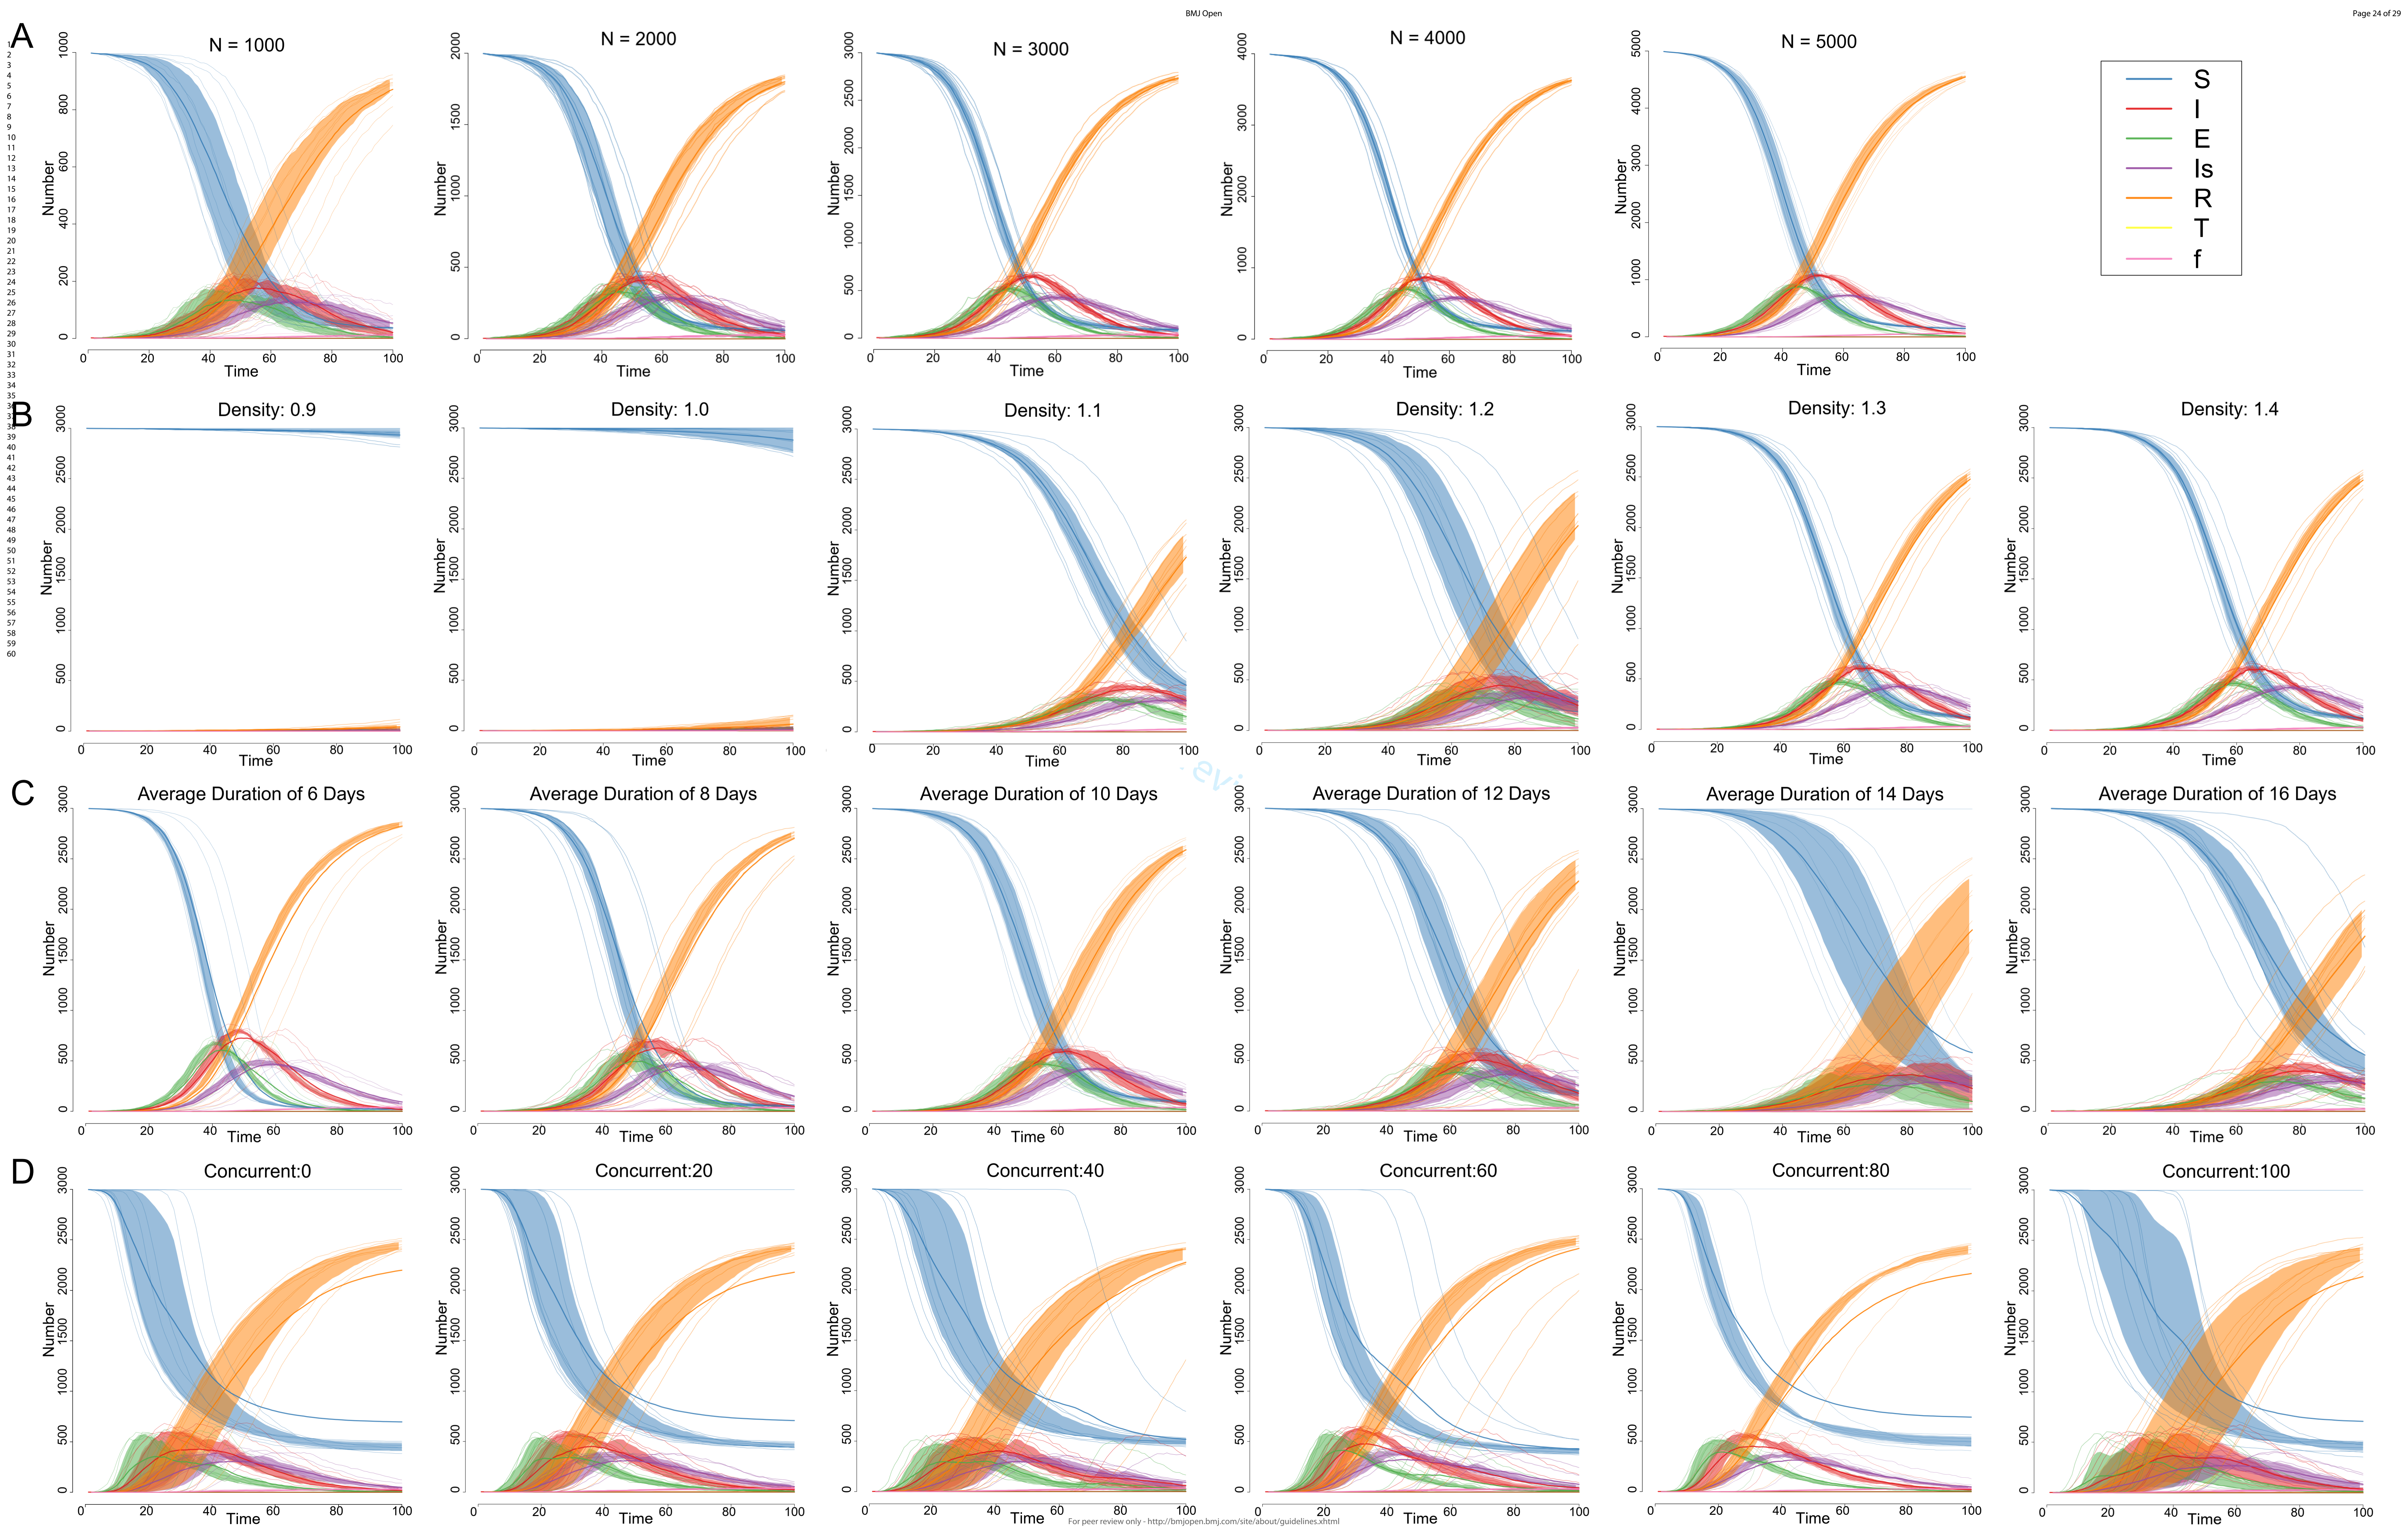



## Supplemental materials

### Model Assumptions

CoTECT assumes all tests hold the best sensitivity and specificity, which described false-positive and true-negative as a small probability event. When a small probability event happened, people exposed to the virus did not change to a tested and quarantined status in an expected period. Yet, this possibility is more than zero during the simulation. If the test sensitivity and specificity drop down, we can prolong the expected waiting time to test and self-quarantine in CoTECT. However, the test model(T) is a self-quarantine status that prevents 100% of infections from the confirmed cases, which is relied on a strong assumption. Furthermore, since the model was built based on a Bernoulli distribution, it is plausible that some infected people skipped from self-quarantine get self-recovery instead (Table S1, S2).

**Table S1. Setting of transmission rates for CoTECT**

|         | Transmission rate | Parameter definition                                                                                | Assumed rate                   | References       |
|---------|-------------------|-----------------------------------------------------------------------------------------------------|--------------------------------|------------------|
| Sampled | E-->T             | Rate per day at which exposed (E) individuals test positive and enter quarantine status (T)         | 1/18<br>(1/15-1/23)            | <sup>1 2 3</sup> |
|         | I-->T             | Rate per day at which infected (I) cases test positive and enter quarantine status (T)              | 1/12<br>(1/9-1/17)             | <sup>1 2 3</sup> |
|         | Is-->T            | Rate per day at which symptomatic infected (Is) cases test positive and enter quarantine status (T) | 1/7<br>(1/4,1/6,1/8,1/10,1/12) | <sup>1</sup>     |
| Fixed   | I-->Is            | Rate per day at which infected (I) cases become symptomatic (Is) cases                              | 1/5                            | <sup>1</sup>     |
| Fixed   | E-->I             | Rate per day at which an exposed (E) individual become infected (I) cases                           | 1/6.4                          | <sup>4</sup>     |
|         | I-->R             | Rate per day at which infected cases with mild or no symptoms (I) recover and are immunized (R)     | 1/14                           | <sup>1 2</sup>   |

|        |                                                                                              |       |                                                     |
|--------|----------------------------------------------------------------------------------------------|-------|-----------------------------------------------------|
| Is-->R | Rate per day at which infected cases with severe symptoms (Is) recover and are immunized (R) | 1/21  | <sup>1</sup> <sup>5</sup>                           |
| T-->R  | Rate per day at which quarantined, test-positive (T) cases recover and are immunized (R)     | 1/17  | Assumed                                             |
| Is-->F | Death rate per day of infected cases with severe symptoms (Is)                               | 0.002 | <sup>2</sup>                                        |
| T-->F  | Death rate per day of test-positive (T) cases                                                | 0.001 | <sup>2</sup> <sup>3</sup> <sup>6</sup> <sup>7</sup> |

**Table S2. Parameter setting for CoTECT network framework**

| Parameter                                          | Definition                                                                                                                    | Value | Reference                                                                                                  |
|----------------------------------------------------|-------------------------------------------------------------------------------------------------------------------------------|-------|------------------------------------------------------------------------------------------------------------|
| Density                                            | Density of whole social network.                                                                                              | 1.3   | Adjusted according to reported R <sub>0</sub> (corresponding with infection probability and contact times) |
| Concurrent                                         | Number of nodes (individuals) which contact many other nodes at a given day                                                   | 0%-3% | Assumed                                                                                                    |
| Isolation                                          | Number of nodes (individuals) who does not make any contact with others at a given day                                        | 0%-3% | Assumed                                                                                                    |
| Infection probability for symptomatic patient (I)  | Probability of an infected individual passes the COVID-19 to another one based on an existed edge between them                | 30%   | Adjusted according to reported R <sub>0</sub>                                                              |
| Infection probability for asymptomatic patient (E) | Probability of an exposed but asymptomatic individual passes the COVID-19 to another one based on a existed edge between them | 20%   | Adjusted according to reported R <sub>0</sub>                                                              |
| Contact times between I                            | Average contact times between two                                                                                             | 3     | Adjusted according to reported R <sub>0</sub>                                                              |

|                         |                                                                                         |   |                                   |
|-------------------------|-----------------------------------------------------------------------------------------|---|-----------------------------------|
|                         | connected individuals (one is infected) in a given day                                  |   |                                   |
| Contact times between E | Average contact times between two connected individuals (one is exposed) in a given day | 3 | Adjusted according to reported R0 |

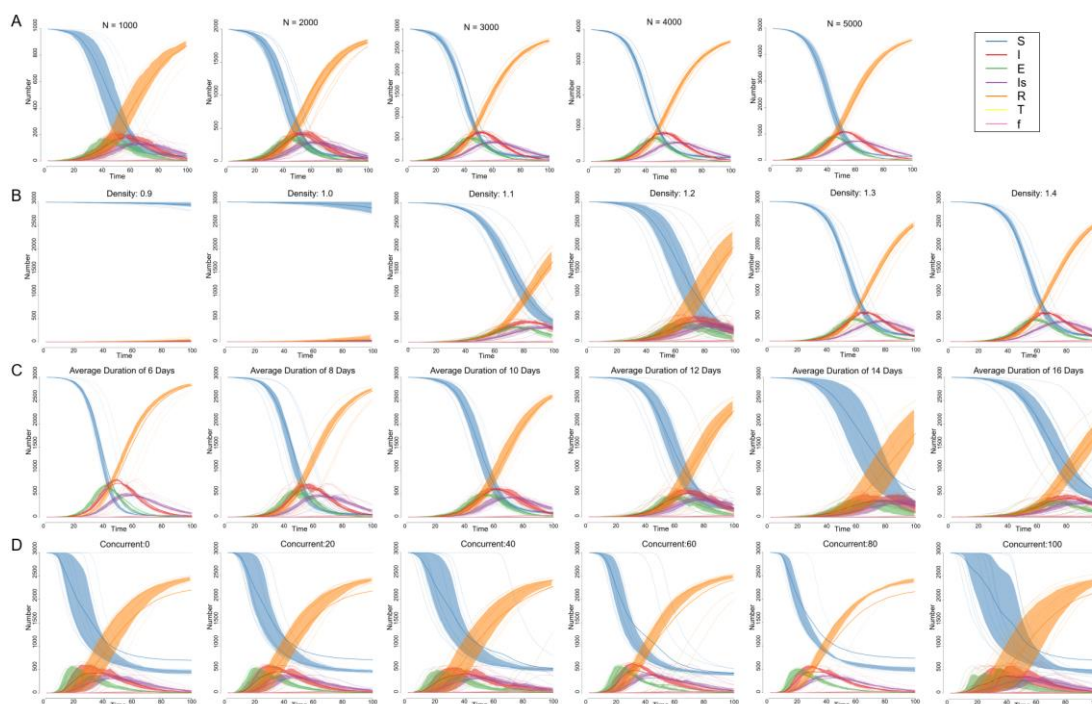

**Figure S1: Sensitivity analyses for baseline models of different (A) population sizes (N=1000, 2000, 3000, 4000, and 5000), (B) densities (0.9, 1.0, ..., 1.4), (C) average duration (6 days, 8 days, ..., 16 days), and (D) concurrent nodes (0, 20, ..., 100). Curves for each compartment in each model are shown in the graphs and demonstrate similar proportions of people in each compartment in the whole population for different population sizes.**

**Table S3: Sensitivity analyses for baseline models of different population sizes, densities, average duration, and concurrent nodes.**

| Parameters      | Values | Total infections | Peak daily infections | Proportion of total infections in whole population | Cumulative deaths of unconfirmed cases |
|-----------------|--------|------------------|-----------------------|----------------------------------------------------|----------------------------------------|
| Population size | 1000   | 883.2            | 290.9                 | 88.3%                                              | 12.1                                   |
|                 | 2000   | 1826.2           | 668.5                 | 91.3%                                              | 27.4                                   |
|                 | 3000   | 2769.8           | 1035                  | 92.3%                                              | 39.3                                   |

|                  |                            |        |        |        |        |
|------------------|----------------------------|--------|--------|--------|--------|
|                  | 4000                       | 3676   | 1378.4 | 91.9%  | 52.7   |
|                  | 5000                       | 4606.9 | 1716.8 | 92.1%  | 60.8   |
| Density          | 0.9                        | 42.5   | 2.5    | 1.42%  | 0.2    |
|                  | 1.0                        | 66.4   | 4.4    | 2.21%  | 0.8    |
|                  | 1.1                        | 1754.6 | 61     | 58.49% | 25     |
|                  | 1.2                        | 2053.8 | 61.7   | 68.46% | 26.1   |
|                  | 1.3                        | 2510.2 | 99.9   | 83.67% | 31.5   |
|                  | 1.4                        | 2747.6 | 106.8  | 91.59% | 37.5   |
|                  | Average duration<br>(Days) | 6      | 2864.4 | 130    | 95.48% |
| 8                |                            | 2741.3 | 102.4  | 91.38% | 38.3   |
| 10               |                            | 2627.7 | 93.4   | 87.59% | 38.7   |
| 12               |                            | 2310.4 | 73.8   | 77.01% | 32.8   |
| 14               |                            | 1823.8 | 52.2   | 60.79% | 24.5   |
| 16               |                            | 1755.3 | 59.4   | 58.51% | 22.1   |
| Concurrent nodes |                            | 0      | 2229.3 | 77.1   | 74.31% |
|                  | 20                         | 2210.4 | 86.7   | 73.68% | 33.8   |
|                  | 40                         | 2302.2 | 67.7   | 76.74% | 30.8   |
|                  | 60                         | 2444.8 | 93.2   | 81.49% | 31.6   |
|                  | 80                         | 2189.8 | 92.9   | 72.99% | 29.6   |
|                  | 100                        | 2167.6 | 69.5   | 72.25% | 27.5   |

### Estimation of IsT rate based on real-world data

According to the public information about the epidemic investigation, we calculated the average time from onset to reporting of the first 23 symptomatic cases in the second-wave outbreak of Covid-19 to be 2.7 days (Table S4), with case data displayed in Table S5. 2.7 days is shorter than four days we set in scenario-1, therefore, it is realistic and feasible to set the window period of the best scenario as four days. According to another cohort study in Beijing<sup>8</sup>, China, the median time interval from illness onset to laboratory confirmation is seven days (4.7–10.2), so a four day window period is rational (Table S4, S5).

**Table S4. Testing efficiency for the second-wave outbreak in Beijing, China**

| Average time from onset to reporting (first 37 cases) | Percentage of cases confirmed by contact tracing (first 37 cases) | Tests for traced contacts (first ten days) | Daily testing capacity within one month | Test efficiency for cases with fever | Test efficiency for other patients | Test efficiency for other patients | Test efficiency for normal test application | Total confirmed cases | Percentage of cases confirmed by targeted screening tests |
|-------------------------------------------------------|-------------------------------------------------------------------|--------------------------------------------|-----------------------------------------|--------------------------------------|------------------------------------|------------------------------------|---------------------------------------------|-----------------------|-----------------------------------------------------------|
| 2.7 days                                              | 68%                                                               | 2342 thousand                              | 90 to 100 thousand                      | 6h                                   | 12h                                | 6h                                 | 24h                                         | 335                   | 52%                                                       |

**Table S5. Average time from onset to reporting, and means of reporting of first 37 cases for the second-wave outbreak in Beijing, China<sup>8</sup>**

| Number of cases | Symptom         | Days from onset to reporting | Means of reporting |
|-----------------|-----------------|------------------------------|--------------------|
| 1               | fever           | 0                            | initiative         |
| 2               | fever           | 4                            | initiative         |
| 3               | fever           | 5                            | initiative         |
| 4               | fever           | 4                            | initiative         |
| 5               | fever           | 1                            | initiative         |
| 6               | fever           | 5                            | initiative         |
| 7               | fever           | 2                            | initiative         |
| 8               | no              | NA                           | tracing            |
| 9               | no              | NA                           | tracing            |
| 10              | muscle soreness | 3                            | tracing            |
| 11              | sore throat     | 2                            | tracing            |
| 12              | fever           | 0                            | initiative         |
| 13              | headache        | 8                            | tracing            |
| 14              | no              | NA                           | tracing            |
| 15              | no              | NA                           | tracing            |
| 16              | sore throat     | 1                            | tracing            |
| 17              | fever           | 4                            | tracing            |
| 18              | fever           | 0                            | initiative         |
| 19              | cough           | 1                            | tracing            |
| 20              | sneeze          | 2                            | tracing            |
| 21              | fever           | 2                            | tracing            |
| 22              | sneeze          | 8                            | tracing            |
| 23              | headache        | 1                            | tracing            |
| 24              | no              | NA                           | tracing            |
| 25              | fever           | 1                            | initiative         |
| 26              | fever           | 4                            | initiative         |
| 27              | fever           | 2                            | tracing            |
| 28              | no              | NA                           | tracing            |

|                |            |            |            |
|----------------|------------|------------|------------|
| 29             | dry throat | 2          | tracing    |
| 30             | no         | NA         | tracing    |
| 31             | no         | NA         | tracing    |
| 32             | no         | NA         | tracing    |
| 33             | no         | NA         | tracing    |
| 34             | no         | NA         | tracing    |
| 35             | no         | NA         | tracing    |
| 36             | no         | NA         | tracing    |
| 37             | no         | NA         | initiative |
| <b>Average</b> |            | <b>2.7</b> |            |

## References

1. Organization WH. Report of the WHO-China Joint Mission on Conronavirus Disease 2019(COVID-19), 2020.
2. Wang D, Hu B, Hu C, et al. Clinical Characteristics of 138 Hospitalized Patients With 2019 Novel Coronavirus–Infected Pneumonia in Wuhan, China. *JAMA* 2020;323(11):1061-69. doi: 10.1001/jama.2020.1585
3. Huang C, Wang Y, Li X, et al. Clinical features of patients infected with 2019 novel coronavirus in Wuhan, China. *The Lancet* 2020;395(10223):497-506. doi: 10.1016/S0140-6736(20)30183-5
4. Backer JA, Klinkenberg D, Wallinga J. Incubation period of 2019 novel coronavirus (2019-nCoV) infections among travellers from Wuhan, China, 20-28 January 2020. LID - 10.2807/1560-7917.ES.2020.25.5.2000062 [doi] LID - 2000062. (1560-7917 (Electronic))
5. Liu Y, Yan L-M, Wan L, et al. Viral dynamics in mild and severe cases of COVID-19. *The Lancet Infectious Diseases* 2020;20(6):656-57. doi: 10.1016/S1473-3099(20)30232-2
6. Li Q, Guan X, Wu P, et al. Early Transmission Dynamics in Wuhan, China, of Novel Coronavirus-Infected Pneumonia. (1533-4406 (Electronic))
7. Russell TW, Hellewell J, Jarvis CI, et al. Estimating the infection and case fatality ratio for coronavirus disease (COVID-19) using age-adjusted data from the outbreak on the Diamond Princess cruise ship, February 2020. LID - 10.2807/1560-7917.ES.2020.25.12.2000256 [doi] LID - 2000256. (1560-7917 (Electronic))
8. China NHCotPsRo. Official Site of National Health Commission of the People's Republic of China 2020 [Available from: [WWW.nhc.gov.cn](http://WWW.nhc.gov.cn) accessed June 2020.

# BMJ Open

## The role of efficient testing and contact tracing in mitigating the COVID-19 pandemic: A network modeling study

|                                 |                                                                                                                                                                                                                                                                                                                                                                                                                                                                                                                                                                                                                                                                                                                                                                                                                                                                                                                                                                                                                |
|---------------------------------|----------------------------------------------------------------------------------------------------------------------------------------------------------------------------------------------------------------------------------------------------------------------------------------------------------------------------------------------------------------------------------------------------------------------------------------------------------------------------------------------------------------------------------------------------------------------------------------------------------------------------------------------------------------------------------------------------------------------------------------------------------------------------------------------------------------------------------------------------------------------------------------------------------------------------------------------------------------------------------------------------------------|
| Journal:                        | <i>BMJ Open</i>                                                                                                                                                                                                                                                                                                                                                                                                                                                                                                                                                                                                                                                                                                                                                                                                                                                                                                                                                                                                |
| Manuscript ID                   | bmjopen-2020-045886.R2                                                                                                                                                                                                                                                                                                                                                                                                                                                                                                                                                                                                                                                                                                                                                                                                                                                                                                                                                                                         |
| Article Type:                   | Original research                                                                                                                                                                                                                                                                                                                                                                                                                                                                                                                                                                                                                                                                                                                                                                                                                                                                                                                                                                                              |
| Date Submitted by the Author:   | 20-Apr-2021                                                                                                                                                                                                                                                                                                                                                                                                                                                                                                                                                                                                                                                                                                                                                                                                                                                                                                                                                                                                    |
| Complete List of Authors:       | Hu, Yiyi; Ping An Healthcare Technology<br>Guo, Jianying; Ping An Healthcare Technology<br>Li, Guanqiao; Tsinghua University School of Medicine and Vanke School of Public Health; Tsinghua Clinical Research Institute (TCRI) , School of Medicine, Tsinghua University<br>Lu, Xi; Tsinghua University School of Medicine and Vanke School of Public Health<br>Li, Xiang; Ping An Healthcare Technology<br>Zhang, Yuan; Ping An Healthcare Technology<br>Cong, Lin; Ping An Healthcare Technology<br>Kang, Yanni; Ping An Healthcare Technology<br>Jia, Xiaoyu; Ping An Healthcare Technology<br>Shi, Xuanling; Tsinghua University School of Medicine and Vanke School of Public Health<br>Xie, Guotong; Ping An Technology, Ping An Healthcare Technology ; Ping An Insurance Group Company of China Ltd, Ping An Health Cloud Company Limited, Ping An International Smart City Technology Co., Ltd<br>Zhang, Linqi; Tsinghua University, School of Medicine and Vanke School of Public Health Beijing, CN |
| <b>Primary Subject Heading</b>: | Public health                                                                                                                                                                                                                                                                                                                                                                                                                                                                                                                                                                                                                                                                                                                                                                                                                                                                                                                                                                                                  |
| Secondary Subject Heading:      | Public health, Infectious diseases, Epidemiology                                                                                                                                                                                                                                                                                                                                                                                                                                                                                                                                                                                                                                                                                                                                                                                                                                                                                                                                                               |
| Keywords:                       | Public health < INFECTIOUS DISEASES, PUBLIC HEALTH, EPIDEMIOLOGY, COVID-19                                                                                                                                                                                                                                                                                                                                                                                                                                                                                                                                                                                                                                                                                                                                                                                                                                                                                                                                     |
|                                 |                                                                                                                                                                                                                                                                                                                                                                                                                                                                                                                                                                                                                                                                                                                                                                                                                                                                                                                                                                                                                |

SCHOLARONE™  
Manuscripts



I, the Submitting Author has the right to grant and does grant on behalf of all authors of the Work (as defined in the below author licence), an exclusive licence and/or a non-exclusive licence for contributions from authors who are: i) UK Crown employees; ii) where BMJ has agreed a CC-BY licence shall apply, and/or iii) in accordance with the terms applicable for US Federal Government officers or employees acting as part of their official duties; on a worldwide, perpetual, irrevocable, royalty-free basis to BMJ Publishing Group Ltd ("BMJ") its licensees and where the relevant Journal is co-owned by BMJ to the co-owners of the Journal, to publish the Work in this journal and any other BMJ products and to exploit all rights, as set out in our [licence](#).

The Submitting Author accepts and understands that any supply made under these terms is made by BMJ to the Submitting Author unless you are acting as an employee on behalf of your employer or a postgraduate student of an affiliated institution which is paying any applicable article publishing charge ("APC") for Open Access articles. Where the Submitting Author wishes to make the Work available on an Open Access basis (and intends to pay the relevant APC), the terms of reuse of such Open Access shall be governed by a Creative Commons licence – details of these licences and which [Creative Commons](#) licence will apply to this Work are set out in our licence referred to above.

Other than as permitted in any relevant BMJ Author's Self Archiving Policies, I confirm this Work has not been accepted for publication elsewhere, is not being considered for publication elsewhere and does not duplicate material already published. I confirm all authors consent to publication of this Work and authorise the granting of this licence.



# The role of efficient testing and contact tracing in mitigating the COVID-19 pandemic: A network modeling study

Yiying Hu, MS <sup>a</sup>, Jianying Guo, PhD <sup>a</sup>, Guanqiao Li, PhD <sup>d e</sup>, Xi Lu, PhD <sup>e</sup>, Xiang Li, PhD <sup>a</sup>, Yuan Zhang, MS <sup>a</sup>, Lin Cong, MS <sup>a</sup>, Yanni Kang, MS <sup>a</sup>, Xiaoyu Jia, BA <sup>a</sup>, Xuanling Shi, PhD <sup>e</sup>, Guotong Xie, PhD <sup>a b c+</sup>, Linqi Zhang, PhD <sup>e+</sup>

<sup>a</sup>Ping An Healthcare Technology

<sup>b</sup>Ping An Health Cloud Company Limited

<sup>c</sup>Ping An International Smart City Technology Co., Ltd.

<sup>d</sup>Tsinghua Clinical Research Institute ( TCRI ), School of Medicine, Tsinghua University, Beijing, China

<sup>e</sup>School of Medicine and Vanke School of Public Health, Tsinghua University, Beijing, China

<sup>+</sup> Linqi Zhang and Guotong Xie share joint correspondence in this work:

Prof Linqi Zhang, School of Medicine and Vanke School of Public Health, Tsinghua University, Beijing, China

zhanglinqi@tsinghua.edu.cn

and

Dr. Guotong Xie, Ping An Technology, Ping An Healthcare Technology; Ping An Insurance Group Company of China Ltd, Ping An Health Cloud Company Limited, Ping An International Smart City Technology Co., Ltd., Beijing, China

xieguotong@pingan.com.cn

## Abstract

### Objectives

This study quantified how the efficiency of testing and contact tracing impacts the spread of COVID-19. The average time interval between infection and quarantine, whether asymptomatic cases are tested, and initial delays to beginning a testing and tracing program were investigated.

### Setting

We developed a novel individual-level network model, called CoTECT, using key parameters from recent studies to quantify the impacts of testing and tracing efficiency. The model distinguishes infection from confirmation by integrating a 'T' compartment, which represents infections confirmed by testing and quarantine. The compartments of presymptomatic (E), asymptomatic (I), symptomatic (Is), and death with (F) or without (f) test confirmation were also included in the model. Three scenarios were evaluated in a closed population of 3,000 individuals to mimic community-level dynamics. Real-world data from four Nordic countries were also analyzed.

### Primary and secondary outcome measures

Simulation result: total/peak daily infections and confirmed cases; total deaths (confirmed/unconfirmed by testing), fatalities, and the case fatality rate. Real-world analysis: confirmed cases and deaths per million people.

### Results

1) Shortening the duration between Is and T from 12 to 4 days reduces infections by 85.2% and deaths by 88.8%. 2) Testing and tracing regardless of symptoms reduces infections by 35.7% and deaths by 46.2% compared with testing only symptomatic cases. 3) Reducing the delay to implementing a testing and tracing program from 50 to 10 days reduces infections by 35.2% and deaths by 44.6%. These results were robust to sensitivity analysis. An analysis of real-world data showed that tests per case early in the pandemic is critical for reducing confirmed cases and the fatality rate.

### Conclusions

Reducing testing delays will help to contain outbreaks. These results provide policymakers with quantitative evidence of efficiency as a critical value in developing testing and contact tracing strategies.

## Strengths and limitations of this study

1. This work provides efficiency as a new perspective when evaluating the impact of testing and tracing from three aspects: 1) the average time interval between infection and test confirmation/quarantine; 2) whether contacts of both symptomatic and asymptomatic infectors undergo testing and contact tracing; and 3) the delay to initiating testing and contact tracing after the first infection early in the outbreak.
2. We quantified the effects of different testing and tracing efficiencies using a self-designed model with a novel structure, and verified their important role in the control of the COVID-19 pandemic.
3. This model is highly practicable, because the ideal average wait time between infection and quarantine can be simulated, and this value can be measured in practice for policymakers to assess whether their actions are efficient.
4. A limitation of this work is that all simulations were conducted in a closed population that did not account for inter-community social activity.
5. Impacts of differences in population age ranges, medical resources, and lockdown measures could be considered in this model in future work.

## Introduction

Coronavirus disease 2019 (COVID-19) has posed severe challenges to the physical and mental health of people worldwide since its outbreak in December 2019<sup>1</sup>. New waves of cases in Asia, South America, and the European Union continue to occur in the first quarter of 2021. It takes long-time effort to achieve global herd immunity, especially when new strains predominate<sup>2-4</sup>. In this condition, testing cases and tracing and quarantining their contacts is still a key non-pharmaceutical intervention. Severe acute respiratory syndrome coronavirus 2 (SARS-CoV-2) is more contagious and has a longer incubation time than SARS-CoV or MERS-CoV<sup>5</sup> and can be transmitted during the incubation period<sup>6 7 8 9 10</sup>. For example, approximately one-third of SARS-CoV-2 infectors in Spain were asymptomatic<sup>11</sup> and contagious. Transmission via latent, presymptomatic, and asymptomatic infected individuals may lead to more rapid spread. Due to the rapid spread of the epidemic and asymptomatic transmission, higher requirements are put forward for testing and tracing. Not only is a large number of tests necessary, but more importantly, efficiency of testing and tracing must be improved. Otherwise, it is difficult to avoid the epidemic rebound before herd immunity is achieved. Therefore, it is crucial to quantify the efficiency of the testing and contact tracing (i.e., the timeliness of testing and tracing). This efficiency is related to three aspects: 1) the average time interval from infection to test confirmation and quarantine; 2) whether symptomatic, asymptomatic, and

1  
2  
3 presymptomatic infectors are tested and traced; and 3) the delay to initiating testing and contact  
4 tracing after the first infection early in the outbreak.  
5  
6

7 The impact of testing and contact tracing (including quarantine) has been widely evaluated by  
8 various models. However, previous studies have focused on quantifying the volume of testing  
9 or the percentage of infections that should be traced, or they have highlighted a combination of  
10 other interventions<sup>12 13,14 15,16,17-22</sup>. Few studies have quantified how the efficiency of testing and  
11 contact tracing limits disease spread. Lopes-Júnior et al.<sup>23</sup> published a protocol to evaluate the  
12 influence of testing capacity for symptomatic individuals on the control of COVID-19. We  
13 referred to this protocol and searched PubMed and Google Scholar in our literature review for  
14 studies evaluating the effect of testing and contact tracing through March 2021. We identified  
15 14 modeling studies were closely related to our work, but most of them did not investigate the  
16 effects on epidemic control of the time interval between infection and quarantine or delays to  
17 the implementation of testing and tracing procedures. Six of these 14 studies<sup>12 13 24-26 27</sup> only  
18 determined the percentage of infections or contacts that needed to be tested and traced to stop  
19 the pandemic, but their models were not designed to quantify the effect of testing and tracing  
20 delays. For example, Ferretti et al.<sup>27</sup> concluded the contact tracing work could be overwhelming  
21 based on the transmission speed and active social interaction. Therefore, they compromised to  
22 strategies which covering only part of the contacts, and the assumptions were fit only for the  
23 exponential phase of the pandemic. Keeling et al.<sup>25</sup> found that 71% of contacts needed to be  
24 traced to reduce the basic reproductive number (R0) below 1 or to relax social-distancing  
25 interventions, but these studies did not mention tracing efficiency (i.e., the time interval needed  
26 for tracing). Other four articles<sup>12 13 24 26</sup> also identified the proportion of contacts that should  
27 be traced. But because the number of infections is unknown in the real world, the usefulness  
28 for policymakers of these studies is limited. Five studies<sup>28 29 30 31 32</sup> were simulations of specific  
29 environments (a university campus, care homes, and Dane County in the United States, and the  
30 United States); thus, their generalizability of their findings is limited. Three studies<sup>33 26</sup>  
31 focused on policies of testing and tracing. For instance, McCombs et al.<sup>33</sup> compared different  
32 testing priority strategies (e.g., people with high-risk or low-risk are tested first, people with  
33 recent/early symptoms are tested first) under the condition that the maximum test volume per  
34 day is fixed. Kucharski et al.<sup>26</sup> simulated the effect on transmission reduction of randomly mass  
35 testing 5% of the population each week and compared it with the effects of isolation and tracing,  
36 but the authors did not analyze different testing scenarios. Bilinski et al.<sup>16</sup> explored whether  
37 testing that includes all identified contacts or only those with symptoms alters the effective  
38 reproductive number. However, these models do not quantify the impacts of testing and tracing  
39 efficiency, which is a vital factor independent of the total amount of testing and tracing.  
40  
41  
42  
43  
44  
45  
46  
47  
48  
49  
50

51 To quantify the impacts of testing and tracing efficiency on COVID-19 containment  
52 and supplement the deficiencies of existing research, we developed a novel individual-  
53 level network model, called CoTECT (Testing Efficiency and Contact Tracing model  
54 for COVID-19). Traditional population-level models cannot evaluate the time interval  
55 between infection and quarantine for each individual, and they do not define the  
56 interaction mode between individuals. Although some individual-level models have  
57 been developed, they are not directly suitable for modeling testing efficiency in  
58  
59  
60

COVID-19 transmission<sup>34</sup>, because infectivity of SARS-Cov2 during incubation period was not considered, and confirmed cases were not distinguished from infections. CoTECT distinguishes between confirmed and unconfirmed infections by integrating a T compartment, which refers to those who are confirmed to be infected by testing and then quarantined. The model also incorporates the following compartments: presymptomatic (E), asymptomatic (I), symptomatic (Is), and death with (F) or without (f) test confirmation. Regarding three aspects of efficiency, we simulated three scenarios using controlled variables with the aim of eliminating confounding factors, and investigated the average time interval between infection and quarantine, whether asymptomatic cases are tested, and initial delays to beginning a testing and tracing program. Other key parameters used in our model were obtained from recent studies. Our model uses novel factors, strategies, and a unique model structure to evaluate how the efficiency of testing and contact tracing impacts the spread of COVID-19. An analysis of real-world data from four Nordic countries (with other similar confounders) revealed that delays in countermeasures adversely affect pandemic progression. Data from the second outbreak in Beijing were used to verify the importance of shorting the time interval between infection and quarantine. We provide a comprehensive and quantitative assessment of the critical factors related to testing and contact tracing that will help implement more effective measures to contain the pandemic.

## Methods

### CoTECT simulation model

CoTECT is a stochastic epidemiological network model that we developed specifically to evaluate how the efficiency of testing and contact tracing impacts the outcome of COVID-19 spread. The model was built with the R language and is based on EpiModel, a platform that can mathematically model infectious disease dynamics, allowing the user to construct a flexible network<sup>35</sup> with the desired likelihood of connections conditional on specific network properties<sup>36 37</sup>. The compartments and parameters were set in accordance with recent COVID-19 research. EpiModel supports stochastic network models developed with self-defined contact modes and interactions between different nodes (i.e., different individuals). This differs from the typical differential equation (compartmental) mode, which assumes that human social activity is based on a large, homogenous, well-mixed population. By contrast, every interaction is a stochastic process in CoTECT. The underlying network is an exponential-family random graph model (ERGM)<sup>38</sup>, developed by Holland and Leinhardt.

Building on the traditional Susceptible-Exposed-Infectious-Recovered (SEIR) structure, we designed the CoTECT model with eight compartments (Figure 1):

1. Susceptible individuals (S)

1  
2  
3 2. Individuals exposed to the virus (E) (i.e., cases in the incubation period). E cases are  
4 considered to be infectious based on the biological characteristics of SARS-CoV-2.  
5  
6

7 3. Infected individuals who do not have observable symptoms (I). Some I cases become  
8 symptomatic and transfer to the Is compartment.  
9

10  
11 4. Infected symptomatic cases (Is) are more likely to appear in the T compartment than I or E  
12 cases, as symptomatic cases are easier to detect.  
13

14  
15 5. Test-positive cases who are quarantined (T). We assumed all cases confirmed by testing are  
16 immediately quarantined.  
17

18  
19 6. Test-positive fatalities (F)

20  
21 7. Fatalities without a positive test confirmation (f)

22  
23  
24 8. Recovered cases (R)

25  
26 A schematic of the model is provided in Figure 1. Arrows represent the transmission rate from  
27 one compartment to another, such as from Is to T, denoted as the IsT rate.  
28  
29

30  
31 Infection occurs at the existing edge (real contact) between two nodes (people), with a given  
32 probability. In our model, the infection rate is determined by the SE rate and the times of contact  
33 between a susceptible person and an exposed person. SE rate related to the probability of a  
34 susceptible person become exposed (E) under the condition of existed connection with another  
35 infected nodes (E, I or Is). The exposed compartment represents the incubation period and  
36 contains individuals with a lower transmission ability than symptomatic, infected cases. This  
37 probability setting is based on the epidemiological characteristics of COVID-19. If the SE rate  
38 is  $p$  and the average times of contact is three, the infection probability between two connected  
39 nodes (people) is  $1 - (1 - p)^3$ . Meanwhile, the edge connecting two nodes is generated and  
40 dissolved by a stochastic process with particular conditions. The conditional probability of an  
41 edge forming and dissolving is based on a Bernoulli distribution of the module-specific  
42 parameter, and the resulting distribution is a binomial mixture<sup>38</sup>. After infection, the status  
43 transmission rate (the combined IsT, IT, and ET rate) is the reciprocal of the waiting interval).  
44 For example, an average 7 day waiting time from symptom onset to quarantine corresponds to  
45 a  $1/7$  transmission rate.  
46  
47  
48  
49  
50

51  
52 In addition to the infection process, the transmission rate from A to B implies a mean duration  
53 of remaining in the A status before changing to B status. For example, a 0.1 recovery rate (IR  
54 rate) indicates a 10 day recovery duration; thus, we defined the efficiency of testing and contact  
55 tracing as the time from E to T or from I to T, reflected as the ET rate and the IT rate,  
56 respectively. All transmission of status of each node form a Bernoulli distribution over time.  
57 The value of  $R_0$  is determined based on the simulated result of changing the number of total  
58 infections (E+I+Is+T). To approach the SARS-CoV-2  $R_0$  value reported by the WHO, we  
59  
60

1  
2  
3 adjusted the network-related parameters in our baseline model, as shown in Figure 2A. Figure  
4 1B displays the stochastic process of the edge generation and desolvation, representing the  
5 dynamic change of the social network. This dynamic change led to the abbreviated version of  
6 the contact network at various time steps.  
7  
8  
9

### 10 **Parameter settings**

11  
12 The parameters used in the model were taken from published values from multiple sources<sup>39 40</sup>  
13 <sup>41 42 43</sup>, most of which were case-level statistics<sup>8 44 45 46</sup>. The parameters are shown in Table S1  
14 and include the incubation period<sup>47 7</sup>, the average time from onset to a severe case<sup>41</sup>, and the  
15 average recovery time<sup>45</sup> for mild and severe cases. The sampled parameters were set at different  
16 grades within the scenarios, while fixed parameters remained constant across all experiments.  
17 A hypothetical population of 3,000 people over 300 days was used. Our assumptions and  
18 network parameters are in line with ERGMs and are listed in Supplemental Table 2. The R0 of  
19 the baseline model was 2.2 and was obtained by adjusting the edge density, maximum number  
20 of connections, and probability of transmission between connected nodes (Table S2). Testing  
21 and tracing efficiencies were defined as an individual's average duration between exposure,  
22 infection, and symptom onset and test confirmation and quarantine. In CoTECT, the efficiency  
23 is translated as the transmission rate (the combined IsT, IT, and ET rate is the reciprocal of the  
24 waiting interval). For example, an average 7 day waiting time from symptom onset to  
25 quarantine corresponds to a 1/7 transmission rate.  
26  
27  
28  
29  
30  
31

32 The efficiency parameters (IsT rate, IT rate, and ET rate) were linked in all experiments setting  
33 according to Table 1. The average time interval from E to I was 6 days; this was based on an  
34 average of 6.4 days<sup>7 10 40 43</sup> from exposure to infection (i.e., the incubation period). Therefore,  
35 the denominator of the IT rate is typically 6 days greater than that of the ET rate. The same  
36 logic applies to the IsT rate. Nevertheless, efficient contact tracing will boost both the IT and  
37 ET rates. CoTECT assumes that all COVID-19 tests have optimal sensitivity and specificity;  
38 therefore, false positives are described as small probability events.  
39  
40  
41

### 42 **Experiment setting**

43  
44 Efficient testing and contact tracing is crucial and includes three aspects: 1) the average duration  
45 (in days) from exposure to self-quarantine for each individual during the pandemic; 2) whether  
46 symptomatic, asymptomatic, and presymptomatic infectors are tested and traced; and 3) the  
47 delay to initiating testing and contact tracing after the first infection early in the outbreak. To  
48 quantify the impacts of different efficiency of testing and tracing on transmission, CoTECT  
49 was used to simulate three different scenarios and one baseline scenario. The critical outcome  
50 indicators were cumulative infection (R+F+f), peak daily infections (E+I+Is), peak daily test-  
51 positive cases with quarantine (T), cumulative test-positive cases, total fatalities, and case  
52 fatality rate (CFR).  
53  
54  
55  
56  
57

58 The baseline scenario is the worst-case condition in which no testing or contact tracing is  
59 conducted. Thus, no quarantine measurements were carried out in this model. When the R0 is  
60

1  
2  
3 greater than 1, most of the population will eventually become infected. Using these assumptions,  
4 we also simulated different combinations of interventions as preliminary experiments to  
5 compare with the baseline scenario: 1) A 4 week delay in response (with no testing or contact  
6 tracing before the fourth week), and testing of symptomatic cases only; 2) A 4 week delay in  
7 response after which symptomatic, presymptomatic, and asymptomatic cases are tested; and 3)  
8 A 2 week delay in response after which symptomatic, presymptomatic, and asymptomatic cases  
9 are tested.  
10  
11  
12

13 We designed the following three scenarios to investigate the importance of testing efficiency  
14 from three aspects. Only one condition was changed, with the other variables remaining  
15 consistent in each scenario. The average of 20 randomly-repeated experiments was taken as the  
16 final result.  
17  
18

19  
20 1) Scenario 1 evaluated the impact of overall testing and contact tracing efficiency by  
21 simulating five different levels of test efficiency, represented by five scales of daily  
22 transmission rate or average IsT rate. The intervals from symptom onset to positive test with  
23 quarantine were 4, 6, 8, 10, and 12 days. The corresponding IsT rates were 1/4, 1/6, 1/8, 1/10,  
24 and 1/12, thus reflecting different testing efficiencies.  
25  
26

27  
28 2) Scenario-2 evaluated the impact of tracing efficiency for pre-and asymptomatic cases by  
29 simulating different IT and ET rates with a fixed IsT rate. Contact tracing for Covid-19 is  
30 critical due to the transmissibility of pre-and asymptomatic infections. The IT and ET rates  
31 reflect contract tracing efficiency. In this scenario, the probability that latent and asymptomatic  
32 (or mild) cases would be tested and isolated (ET and IT rate) was adjusted by 0, 1/13, and 1/11.  
33 The fixed IsT rate was 1/7, which assumed seven days waiting for an interval from onset to  
34 quarantine.  
35  
36

37  
38 3) Scenario-3 evaluated the impact of delayed implementation of efficient testing and contact  
39 tracing. The response times have varied significantly worldwide. Many countries were not well  
40 prepared for the pandemic, and targeted testing and contact tracing measures were often not  
41 implemented until after many confirmed case fatalities. Therefore, we simulated different  
42 public health response delays in CoTECT. Five experiments were conducted with fixed IsT,  
43 IT, and ET rates. The delay intervals between the first infection and implementation of targeted  
44 testing were set as 10, 20, 30, 40, and 50 days. The transmission rates from the E, I, and Is  
45 compartments to T were set as 0 prior to the response.  
46  
47  
48  
49

### 50 Sensitivity analysis

51  
52 We conducted the sensitivity analysis to elaborate how other factors (network parameters)  
53 would impact the transmission process. Firstly, we evaluated transmission progression when  
54 no testing or contact tracing was in place for varying population sizes. For the three scenarios,  
55 the mean R0 was set as 2.2. The network density and contact duration between nodes were  
56 consistent across the main experiments.  
57  
58  
59  
60



1  
2  
3 Secondly, the sensitivity analysis also included tests of network-related parameters, which  
4 describe the disease transmission model's underlying social activity patterns. In our study, the  
5 simulation model built upon a graph model consisted of edges and nodes. The edge between  
6 two nodes reflects a relatively close contact that could result in disease transmission with a  
7 certain probability. In CoTECT, the edges can be interpreted, for example, as face-to-face  
8 conversations or sharing a car ride. Unlike the sensitivity analysis of the population size, which  
9 uses a constant infection ratio and transmission rate but applies different network sizes, the  
10 network-related parameter test demonstrates how these parameters impact disease transmission.  
11  
12  
13  
14

15 We tested each edge's mean duration (contact), concurrent edges (how many simultaneous  
16 contacts happened per day), and the density of the entire network. The results are presented in  
17 the supplemental materials (Figure S1, Table S3). As previously mentioned, the final set of  
18 these parameters was tuned based on the R0 of the simulated baseline.  
19  
20

21 Patient and public involvement

22  
23  
24 No patients or other members of the public were involved in this study.  
25  
26

## 27 Results

28  
29  
30 We carried out preliminary experiments to show how the CoTECT model simulates  
31 transmission under different conditions of testing and contact tracing. We then demonstrated  
32 how disease transmission is impacted by 1) the efficiency of comprehensive testing and contact  
33 tracing, 2) the efficiency of contact tracing for presymptomatic and asymptomatic cases, and  
34 3) delaying the implementation of efficient testing and contact tracing.  
35  
36  
37

### 38 Preliminary results of CoTECT simulation

39  
40  
41 We first defined the baseline model as the worst-case scenario with no epidemiological  
42 interventions conducted in a closed population. The baseline R0 was 2.2, according to the  
43 average R0 estimated<sup>48</sup> from 177 countries and territories<sup>49</sup>. (Figure 2A), aligned with  
44 previously published studies<sup>41</sup>. Then we compared the baseline model with different  
45 combinations of testing and contact tracing interventions to evaluate their respective impact on  
46 disease transmission. The infection curve is shown in Figure 2B. We assumed each community  
47 responded a minimum of several weeks after the first infection. The dark blue line indicates the  
48 outcome for a delay of four weeks and testing only symptomatic cases. Total infections, peak  
49 daily infections, and total deaths were reduced by 13.2%, 43.7%, and 27.3%, respectively,  
50 compared to baseline. The navy line shows the outcome of an open test policy (not only  
51 symptomatic cases) with a four-week delay. Total infections, peak daily infections, and total  
52 deaths decreased by 23.4%, 43.1% and 41.3%, respectively, compared to baseline. The light  
53 blue line shows the outcome for a delay of two weeks after the first infection. Total infections,  
54 peak daily infections, and total deaths decreased by 44.1%, 75.8% and 61.0%, respectively,  
55 compared to baseline.  
56  
57  
58  
59  
60

1  
2  
3 Daily new symptomatic, pre-and asymptomatic cases confirmed by testing in three conditions  
4 are shown in Figure 2C. Compared with condition-1 (only testing symptomatic cases with 4-  
5 week delay), condition-2 (testing and tracing pre- and asymptomatic contacts with 4-week  
6 delay) could reduce 24.8% of total confirmed cases (from 125 to 94), and 26.5% of 94  
7 confirmed cases were diagnosed before symptom onset (E+I). Condition-3 (tracing contacts  
8 and testing with a 2-week delay) could reduce 51.2% of total confirmed cases (from 125 to 61),  
9 33.6% of 61 confirmed cases were diagnosed before symptom onset (E+I). Moreover,  
10 compared to condition-2, Condition-3 also reduced daily peak confirmed Is, I, and E cases by  
11 65.8% (from 38 to 13), 75.0% (from 16 to 4), and 75.0% (from 20 to 5), respectively. We  
12 further demonstrated trends of all compartments in baseline and different conditions (Figure  
13 2D). Compared to baseline, as infections decreased in 3 conditions, the S individuals (those  
14 who remain uninfected) of condition-1, -2, -3 were 6.6, 11.6, and 20.7 times of S individuals  
15 of baseline model after 300 days of the epidemic, respectively. Meanwhile, 27.7%, 41.5%, and  
16 61.2 % of deaths (confirmed and unconfirmed by testing) of the baseline model were saved in  
17 condition-1, -2, -3, respectively. These results indicate that reduced time to action and better  
18 identification of pre-and asymptomatic cases are critical factors in flattening the infection curve  
19 and decreasing the deaths.  
20  
21  
22  
23  
24  
25  
26

### 27 **Impacts of overall testing and contact tracing efficiency to all infectors**

28  
29 Scenario-1 simulated five different test efficiency levels represented by five different daily  
30 transmission rates from Is to T (IsT rate): 1/4, 1/6, 1/8, 1/10, and 1/12. The daily transmission  
31 rate from I to T (IT rate) and from E to T (ET rate) changed in accordance with the IsT rate.  
32 This scenario assumes that contact tracing efficiency changed with the IsT rate, and therefore  
33 latent, asymptomatic cases could also be tested. We found that longer public health response  
34 delays (i.e., lower IsT rates) resulted in higher peak daily new transmitters, peak daily new  
35 diagnoses, and overall cumulative infections. Besides, the number of diagnosed and  
36 undiagnosed fatalities and the proportion of undiagnosed fatalities increased as IsT rates  
37 declined, indicating that fewer tests and slower response times resulted in worse epidemic  
38 outcomes. We decreased the IsT delay from 12 to 4 days in two days intervals and found that,  
39 compared to baseline, total infections decreased by 20.5%, 29.2%, 39.0%, 57.0% and 88.3%,  
40 respectively, and total deaths decreased by 36.0%, 46.7%, 52.2%, 70.6% and 92.8%,  
41 respectively. Peak daily infections across the five experiments increased linearly as IsT rates  
42 decreased (Table 1, Figure 3A).  
43  
44  
45  
46  
47  
48

### 49 **Impacts of contact tracing efficiency for pre-and asymptomatic cases**

50  
51 Scenario-2 quantified the importance of efficient contact tracing. Owing to asymptomatic  
52 transmissibility, contact tracing is critical for effective containment. The tracing efficiency is  
53 represented by either the IT or ET rate. Therefore, we designed simulations with a fixed IsT  
54 rate (1/7) and varied the IT (1/12, 1/19, 0) and ET rates (1/17, 1/24, 0). The results showed that  
55 larger ET and IT rates resulted in fewer overall infections, confirmed cases, and confirmed and  
56 unconfirmed fatalities. More efficient contact tracing (12-day delay from infected to testing for  
57 I cases) would prevent 36% of cumulative infections, 64% of peak daily infections, 46% of  
58  
59  
60

1  
2  
3 peak daily confirmed cases, and 46% of total deaths compared to no contact tracing. Less  
4 efficient contact tracing (as a 19-day delay from infected to testing for I patients) prevented  
5 23% of cumulative infections, 50% of peak daily infections, 32% of peak daily confirmed cases,  
6 and 33% of total fatalities compared to no contact tracing. Thus, more efficient contact tracing  
7 resulted in fewer infections (Table 1, Figure 3B).  
8  
9

### 10 **Impacts of delayed implementation of efficient testing and contact tracing**

11  
12  
13 Scenario-3 evaluated the impact of delayed implementation of efficient testing and contact  
14 tracing. We found that cumulative infections and fatalities increased with increasing delay  
15 intervals. Compared to 50-day delay, delays of 10, 20, 30 and 40 days reduced total infections  
16 by 35.2%, 32.9%, 20.7% and 7.6%, respectively, and total deaths by 44.6%, 43.7%, 32.6% and  
17 12.7%, respectively. The increase in peak daily transmitters as delay interval increased  
18 followed a sigmoid-shape curve (Table 1, Figure 3C). Clearly, implementing a prompt testing  
19 response within 20 days of the first infection had much more impact than response 20 days  
20 later.  
21  
22  
23

24  
25 The critical impact of the prompt initiation of a testing program is demonstrated in our  
26 simulation and is observed in real-world data. Measures of testing sufficiency are the number  
27 of tests conducted per confirmed case (TPC) and the number of tests per million people (TPM).  
28 Here, efficiency is measured as the average time interval between infection and a positive  
29 COVID-19 test. A sufficient testing capacity, estimated by TPC and TPM, is a prerequisite for  
30 efficient testing. Decreasing TPC trends indicate that disease transmission is outpacing testing  
31 and that efficiency is decreasing. The three indicators of epidemic control are CFR, confirmed  
32 cases per million people (CPM), and deaths per million people (DPM).  
33  
34  
35

36  
37 For comparison, we selected four Nordic countries that have similar medical resources,  
38 population age ranges, geography, and climate (Figure 4). Day 0 was defined as the day on  
39 which the daily DPM reached 0.1. Norway, Finland, and Denmark experienced a similar  
40 lockdown duration in the first 70 days, and the TPC over the first 70 days increased in all  
41 countries. From Day 0 to 14, TPC was highest in Norway, followed by Finland and Denmark.  
42 Between Day 15 and 70, although the TPCs in Norway and Finland were similar, the CFR in  
43 Norway (2.8%) was lower than in Finland (4.6%). This implies that the early outbreak TPC  
44 values were a more significant factor than later TPC values in controlling the pandemic.  
45 Denmark had the lowest early outbreak TPC of these three countries. Even though its TPC later  
46 grew dramatically and far exceeded those of Norway and Finland, its CFR (4.9%) was higher  
47 than those of Norway and Finland. We also observed that the overall TPM in Denmark from  
48 Day 0 to 70 was 2.7 times those of Norway and Finland. This implies that the early stage TPC  
49 may have a more significant influence on the overall CFR than the late-stage TPC, consistent  
50 with our hypothesis that early testing plays a critical role, without which testing efforts must be  
51 heavily increased as transmission rates worsen. In Sweden, the TPC gradually decreased.  
52 Sweden's CFR (12%) was the highest of all four countries. This indicates that insufficient  
53 testing in the early stage might not be remedied by subsequently increasing the testing volume.  
54  
55  
56  
57  
58  
59  
60

## Sensitivity analysis

To validate the rationality of our model's network settings, we conducted sensitivity analyses using various population sizes and different settings of the parameters related to  $R_0$ .

We first compared baseline models with population sizes of 1,000, 2,000, 3,000, 4,000, and 5,000. The proportion of cumulative infections, peak daily infections, and cumulative deaths were similar in all five models. However, there was considerably more variation between the 1,000 and 2,000 population models than between the models with population sizes of 3,000 or more. These findings underpinned our rationale for using a representative population of 3,000 (Figure S1, Table S3).

Second, a sensitivity analysis of  $R_0$ -related parameters emphasized how the structure of a social network impacts disease transmission. In addition to the intrinsic properties of SARS-CoV-2, the value of  $R_0$  is determined by three parameters that we studied in the sensitivity analysis: the social network density, concurrent contacts (the number of people a person has contact with), and the average duration of contact between two people. The network density will directly impact the rate of disease spread (Figure S1, Table S3). An extremely low density is difficult to maintain in most areas. However, we can expect that a low density would occur in a town under lockdown for a short period of time. Decreasing the number of concurrent nodes with a fixed density will skew the infection number curve. This also affects the variance, because concurrent nodes become critical nodes that can spread the disease to many other nodes. The duration of an edge indicates the stability of the relationship between two nodes. The results revealed that increased stability would flatten the infection curve. It is clear that if we were to only contact the same group of people repeatedly, the possibility of infection would decrease. The value of  $R_0$  changed when the settings of these three parameters were altered. To improve the universality of our model, we selected suitable ranges for these parameters to achieve the average  $R_0$  reported in other studies (Figure 2A). The  $R_0$  distribution in our baseline simulation corresponded to the average  $R_0$  estimated from 177 countries and territories [ref38]. The sensitivity analysis showed the validity of how we regulated parameters that are related to transmission dynamics. For all experiments, the mean  $R_0$  was set as 2.2. The network density, concurrent contacts, and the relationship duration between nodes were consistent across all experiments.

## Discussion

### Principal findings

This work quantified how testing and contact tracing efficiency, investigated as the average duration between infection and quarantine and the delay in testing and tracing close contacts after the first identified infection, can influence COVID-19 transmission. 1) Scenario 1 demonstrates that shortening the average time interval between symptom onset and quarantine from 12 days to 4 days results in an 85.2% reduction in infections and an 88.8% decrease in

1  
2  
3 deaths. 2) Scenario 2 indicates testing and tracing regardless of symptoms (a 7 day interval for  
4 Is to T, with the E/I to T intervals changing accordingly) reduces infections by 35.7% and  
5 deaths by 46.2% compared with testing symptomatic cases (Is) alone. 3) Reducing the delay in  
6 implementing an efficient testing and tracing program from 50 days to 10 days reduces  
7 infections and deaths by 35.2% and 44.6%, respectively. Scenario 3 implies that the delayed  
8 implementation of testing and contact tracing will lead to a massive demand in testing capacity,  
9 which is also supported by the analysis of data from the four Nordic countries. Thus, efficient  
10 testing and contact tracing can reduce disease transmission and the overall number of fatalities.  
11  
12  
13  
14

### 15 **Strengths and weaknesses of the study**

16  
17 Strengths of this work include: 1) It provides a new perspective on evaluating the effect of  
18 testing and tracing in addition to the test volume at the individual level. This new perspective  
19 focuses on the efficiency of testing and tracing. Our work indicates that controlling the COVID-  
20 19 pandemic requires a rapid response to testing and tracing rather than solely relying on a  
21 massive testing capacity. 2) We quantified the effects of different testing and tracing  
22 efficiencies using a self-developed model, called CoTECT, as well as real-world data to verify  
23 their important role in controlling the COVID-19 pandemic. The model quantified the  
24 additional percentage of infections and deaths that would occur when the implementation of  
25 these efficient measures is delayed. 3) This model is highly practicable. The ideal average wait  
26 time between infection and quarantine was simulated, and this time interval can be measured  
27 in practice for policymakers to determine whether their actions are efficient. Our main  
28 conclusions can be generalized to different circumstances, from megacities to small villages.  
29  
30  
31  
32  
33

34 Weaknesses of this study include: 1) All simulations were conducted in a closed population;  
35 the model did not account for inter-community social activity. 2) We assumed that nearly 100%  
36 of the tests were accurate because false-positive tests result in an unnecessary self-quarantine.  
37 We also assumed that no infections would occur after self-quarantine.  
38  
39  
40

### 41 **Strengths and weaknesses in relation to other studies**

42  
43 While previous studies<sup>12 13 16 24-26 27</sup> have typically emphasized the amount or percentage of  
44 infections or contacts that need to be tested and traced, our model simulates the ideal average  
45 wait time between infection and quarantine, which is a more practical criterion that is easily  
46 measured in real-world epidemiological investigations. In contrast, the percentage or number  
47 of infections that need to be tested and traced proposed by other modeling studies are less useful;  
48 this is because the true number of infections is difficult to estimate in the real world.  
49  
50  
51

52 In addition, we did not limit our analysis to estimating a fixed, total amount of testing required,  
53 because the capacity of testing changes over time. Instead, we focused on the duration between  
54 an exposure event and when an exposed person receives their test result (i.e., the efficiency of  
55 testing and contact tracing). We found that more efficient testing can reduce the number of  
56 infections and deaths and decrease the fatality rate, and demand in testing capacity will increase  
57 as implementation of testing and contact tracing delayed. The testing and contact tracing  
58  
59  
60

1  
2  
3 capacity should be considered along with the demand for testing, which is related to the total  
4 number of infections.  
5  
6

7 In contrast to models that are suitable only for specific regions and conditions<sup>28 29 30 31 32</sup>, our  
8 tool has potential to be used for various population sizes and is generalizable to different types  
9 of communities. The novelty of this method is reflected in the model's structure and scenario  
10 design. Using the timeliness of individual testing, CoTECT can predict macro perspective  
11 outcomes.  
12  
13

14  
15 The weakness of our work in relation to other studies is that age ranges of the population, the  
16 medical resources, and lockdown measures were not explicitly adjusted in this model (regarded  
17 as controlled variables). Impacts of these variables have been considered in other existed  
18 studies<sup>27 15 18 33</sup>.  
19  
20

### 21 **Meaning of the study**

22  
23  
24 Our results provide professionals and policymakers with quantitative evidence showing that  
25 efficiency is a critical value in the development of testing and contact tracing strategies. Our  
26 model is particularly useful for nations facing a potential second or third wave of COVID-19  
27 or the spread of mutated virus strains or other emerging infectious diseases. We provide a novel  
28 tool, CoTECT, that policymakers can use to simulate the effects of delays to implementing  
29 testing and tracing systems, which could help them balance the costs with the risks. The model  
30 highlights that it is critical to consider the transmission rates from presymptomatic and  
31 asymptomatic cases, as well as the time delay between testing and quarantine.  
32  
33  
34

35  
36 Meaning of our conclusions drew from 3 scenarios is: 1) according to Scenario 1, an extra 4  
37 days of waiting will lead to a considerable difference in total infections and deaths. At one  
38 point, the mean wait time between taking a COVID-19 test and receiving the result was 4.1  
39 days in the United States, which is disadvantageous for controlling disease spread<sup>50</sup>. So, our  
40 study indicates the government and testers of some countries should improve the efficiency of  
41 testing; 2) an example of the value of efficient testing is the successful containment of the  
42 second COVID-19 outbreak in Beijing, China. Highly efficient testing (open to all regardless  
43 of symptoms) and contact tracing began immediately after the first case was identified<sup>51 52,53 54</sup>  
44 and average time from onset to reporting of first 37 cases was 2.7 days (Tables S4 and S5).  
45 This is in marked contrast to the first outbreak in Wuhan when testing was less efficient and  
46 containment was slower, which verified our scenario 1 and 2. 3) In Scenario 3 we focused on  
47 the delay between the first infection and implementation of contact tracing and testing. In the  
48 real world, the longer the delay, the higher the initial positive rate would be (the lower TPC),  
49 which was analyzed in Nordic countries. We recommend government to increase TPC as soon  
50 as possible in the early stage of a pandemic, which is critical in reducing the number of  
51 confirmed cases and the fatality rate.  
52  
53  
54  
55  
56  
57

### 58 **Unanswered questions and future research**

1  
2  
3 Some unanswered questions are: 1) How does inter-community social activity affect our model?  
4 2) How does variables such as population age ranges, medical resources, and lockdown  
5 measures lead to different results? 3) Whether the socioeconomic resources required for  
6 efficient testing could be estimated? To solve these issues, we will introduce more variables  
7 and improve our model to study the impact of testing and contact tracing efficiency under  
8 different circumstances of constraints and countermeasures.  
9  
10  
11  
12

### 13 **Contribution statement**

14  
15  
16 Y. Hu designed and directed the project; Y. Hu and J. Guo wrote the article; X. Li, G. Li, X.  
17 Lu, Y. Zhang, L. Cong, Y. Kang, and X. Jia aided in data analysis or writing framework. X. Li,  
18 X. Shi, and G. Xie were supervising the study, L. Zhang was guiding and supervising the study.  
19 All authors meet the ICMJE criteria for authorship.  
20  
21  
22

### 23 **Declaration of interests**

24  
25  
26 We declare no competing interests.  
27  
28  
29

### 30 **Data sharing**

31  
32  
33 Data are available in a public, open access repository. Data are available upon reasonable  
34 request. Data are available by emailing [moehu@foxmail.com](mailto:moehu@foxmail.com).  
35  
36  
37

### 38 **Acknowledgments**

39  
40  
41 We thank Kelly C. McMilan Ph.D. and Katherine Thieltges from Liwen Bianji, Edanz Editing  
42 China ([www.liwenbianji.cn/ac](http://www.liwenbianji.cn/ac)), for editing the English text of a draft of this manuscript.  
43  
44  
45

### 46 **Funding**

47  
48  
49 There is no funding to report for this submission.  
50  
51  
52  
53

54 Table 1: Baseline and Scenario-1, -2, and -3 model outcomes  
55  
56  
57  
58  
59  
60

|             | Delay (days) to targeted testing and contact tracing (T delay) | Average waiting interval (days) from Is to T (1/IsT rate) | Average waiting interval (days) from I to T (1/IT rate) | Total infections | Peak daily infections | Peak daily test confirmations | Total deaths | The proportion of unconfirmed deaths in total deaths |
|-------------|----------------------------------------------------------------|-----------------------------------------------------------|---------------------------------------------------------|------------------|-----------------------|-------------------------------|--------------|------------------------------------------------------|
| Baseline    | No testing                                                     | No IsT transformation                                     | No IT transformation                                    | 2933.6           | 1553.2                | 0                             | 78.1         | 100%                                                 |
| Scenario -1 | 0                                                              | 4                                                         | Yes                                                     | 344.3            | 48.7                  | 38.1                          | 5.6          | 36%                                                  |
|             |                                                                |                                                           |                                                         | 1261.4           | 181.8                 | 128.3                         | 23           | 39%                                                  |
|             |                                                                |                                                           |                                                         | 1789             | 328.5                 | 208.9                         | 37.3         | 49%                                                  |
|             |                                                                |                                                           |                                                         | 2077.3           | 425                   | 251.8                         | 41.6         | 54%                                                  |
|             |                                                                |                                                           |                                                         | 2330.8           | 581                   | 318.3                         | 50           | 56%                                                  |
| Scenario -2 | 0                                                              | 7                                                         | No IT transformation                                    | 2510.9           | 800.4                 | 315                           | 57.2         | 67%                                                  |
|             |                                                                |                                                           |                                                         | 1941.2           | 396.6                 | 213                           | 38.1         | 51%                                                  |
|             |                                                                |                                                           |                                                         | 1614.6           | 285.5                 | 168.9                         | 30.8         | 45%                                                  |
| Scenario -3 | 10                                                             | 7                                                         | Yes                                                     | 1857.6           | 360.1                 | 233.4                         | 37.2         | 46%                                                  |
|             |                                                                |                                                           |                                                         | 1922.6           | 456.2                 | 294.4                         | 37.8         | 49%                                                  |
|             |                                                                |                                                           |                                                         | 2272.3           | 764.1                 | 455.5                         | 45.2         | 55%                                                  |
|             |                                                                |                                                           |                                                         | 2649.8           | 1129.5                | 543                           | 58.6         | 71%                                                  |
|             |                                                                |                                                           |                                                         | 2866.7           | 1231.6                | 400.5                         | 67.1         | 82%                                                  |

## References



- 1  
2  
3 1. Silva Junior FJGd, Sales JCeS, Monteiro CFdS, et al. Impact of COVID-19 pandemic on  
4 mental health of young people and adults: a systematic review protocol of observational studies.  
5 *BMJ Open* 2020;10(7):e039426. doi: 10.1136/bmjopen-2020-039426  
6  
7
- 8 2. van Oosterhout C, Hall N, Ly H, et al. COVID-19 evolution during the pandemic –  
9 Implications of new SARS-CoV-2 variants on disease control and public health policies.  
10 *Virulence* 2021;12(1):507-08. doi: 10.1080/21505594.2021.1877066  
11  
12
- 13 3. States CoU. Science Brief: Emerging SARS-CoV-2 Variants 2021 [Available from:  
14 [https://www.cdc.gov/coronavirus/2019-ncov/science/science-briefs/scientific-brief-emerging-](https://www.cdc.gov/coronavirus/2019-ncov/science/science-briefs/scientific-brief-emerging-variants.html)  
15 [variants.html](https://www.cdc.gov/coronavirus/2019-ncov/science/science-briefs/scientific-brief-emerging-variants.html).  
16  
17
- 18 4. Robert Bollinger MD, M.P.H;Stuart Ray, M.D. New Variants of Coronavirus: What You  
19 Should Know: Johns Hopkins Medicine 2021 [Available from:  
20 [https://www.hopkinsmedicine.org/health/conditions-and-diseases/coronavirus/a-new-strain-](https://www.hopkinsmedicine.org/health/conditions-and-diseases/coronavirus/a-new-strain-of-coronavirus-what-you-should-know)  
21 [of-coronavirus-what-you-should-know](https://www.hopkinsmedicine.org/health/conditions-and-diseases/coronavirus/a-new-strain-of-coronavirus-what-you-should-know).  
22  
23
- 24 5. Petrosillo N, Viceconte G, Ergonul O, et al. COVID-19, SARS and MERS: are they closely  
25 related? *Clin Microbiol Infect* 2020;26(6):729-34. doi: 10.1016/j.cmi.2020.03.026 [published  
26 Online First: 2020/04/03]  
27  
28
- 29 6. Furukawa NW, Brooks JT, Sobel J. Evidence supporting transmission of severe acute  
30 respiratory syndrome coronavirus 2 while presymptomatic or asymptomatic. *Emerging*  
31 *infectious diseases* 2020;26(7)  
32  
33
- 34 7. Backer JA, Klinkenberg D, Wallinga J. Incubation period of 2019 novel coronavirus (2019-  
35 nCoV) infections among travellers from Wuhan, China, 20-28 January 2020. LID -  
36 10.2807/1560-7917.ES.2020.25.5.2000062 [doi] LID - 2000062. (1560-7917 (Electronic))  
37  
38
- 39 8. Yu P, Zhu J, Zhang Z, et al. A Familial Cluster of Infection Associated With the 2019 Novel  
40 Coronavirus Indicating Possible Person-to-Person Transmission During the Incubation Period.  
41 *J Infect Dis* 2020;221(11):1757-61. doi: 10.1093/infdis/jiaa077 [published Online First:  
42 2020/02/19]  
43  
44
- 45 9. Lipsitch M, Cohen T, Cooper B, et al. Transmission Dynamics and Control of Severe Acute  
46 Respiratory Syndrome. *Science* 2003;300(5627):1966. doi: 10.1126/science.1086616  
47  
48
- 49 10. Jiang X, Rayner S, Luo MH. Does SARS-CoV-2 has a longer incubation period than SARS  
50 and MERS? *Journal of medical virology* 2020;92(5):476-78.  
51  
52
- 53 11. Pollán M, Pérez-Gómez B, Pastor-Barriuso R, et al. Prevalence of SARS-CoV-2 in Spain  
54 (ENE-COVID): a nationwide, population-based seroepidemiological study. *The Lancet* 2020  
55  
56  
57  
58  
59  
60

1  
2  
3  
4  
5  
6  
7  
8  
9  
10  
11  
12  
13  
14  
15  
16  
17  
18  
19  
20  
21  
22  
23  
24  
25  
26  
27  
28  
29  
30  
31  
32  
33  
34  
35  
36  
37  
38  
39  
40  
41  
42  
43  
44  
45  
46  
47  
48  
49  
50  
51  
52  
53  
54  
55  
56  
57  
58  
59  
60

12. Kretzschmar ME, Rozhnova G, Bootsma MCJ, et al. Impact of delays on effectiveness of contact tracing strategies for COVID-19: a modelling study. *The Lancet Public Health* 2020;5(8):e452-e59. doi: 10.1016/S2468-2667(20)30157-2

13. Hellewell J, Abbott S, Gimma A, et al. Feasibility of controlling COVID-19 outbreaks by isolation of cases and contacts. *The Lancet Global Health* 2020;8(4):e488-e96. doi: 10.1016/S2214-109X(20)30074-7

14. Peak CM, Kahn R, Grad YH, et al. Individual quarantine versus active monitoring of contacts for the mitigation of COVID-19: a modelling study. *The Lancet Infectious Diseases* 2020;20(9):1025-33. doi: 10.1016/S1473-3099(20)30361-3

15. Firth JA, Hellewell J, Klepac P, et al. Using a real-world network to model localized COVID-19 control strategies. *Nature medicine* 2020:1-7.

16. Bilinski A, Mostashari F, Salomon JA. Modeling Contact Tracing Strategies for COVID-19 in the Context of Relaxed Physical Distancing Measures. *JAMA Network Open* 2020;3(8):e2019217-e17. doi: 10.1001/jamanetworkopen.2020.19217

17. Leung K, Wu JT, Liu D, et al. First-wave COVID-19 transmissibility and severity in China outside Hubei after control measures, and second-wave scenario planning: a modelling impact assessment. *The Lancet* 2020;395(10233):1382-93. doi: 10.1016/S0140-6736(20)30746-7

18. Flaxman S, Mishra S, Gandy A, et al. Estimating the effects of non-pharmaceutical interventions on COVID-19 in Europe. *Nature* 2020;584(7820):257-61. doi: 10.1038/s41586-020-2405-7

19. Müller M, Derlet PM, Mudry C, et al. Testing of asymptomatic individuals for fast feedback-control of COVID-19 pandemics. *Phys Biol* 2020 doi: 10.1088/1478-3975/aba6d0 [published Online First: 2020/07/17]

20. Li Q, Tang B, Bragazzi NL, et al. Modeling the impact of mass influenza vaccination and public health interventions on COVID-19 epidemics with limited detection capability. *Math Biosci* 2020;325:108378. doi: 10.1016/j.mbs.2020.108378 [published Online First: 2020/06/09]

21. Panovska-Griffiths J, Kerr CC, Stuart RM, et al. Determining the optimal strategy for reopening schools, the impact of test and trace interventions, and the risk of occurrence of a second COVID-19 epidemic wave in the UK: a modelling study. *The Lancet Child & Adolescent Health* 2020

22. Kucharski AJ, Klepac P, Conlan A, et al. Effectiveness of isolation, testing, contact tracing and physical distancing on reducing transmission of SARS-CoV-2 in different settings. *medRxiv* 2020

- 1  
2  
3  
4 23. Lopes-Júnior LC, Bomfim E, Silveira DSCd, et al. Effectiveness of mass testing for control  
5 of COVID-19: a systematic review protocol. *BMJ Open* 2020;10(8):e040413. doi:  
6 10.1136/bmjopen-2020-040413  
7  
8  
9  
10 24. Kretzschmar ME, Rozhnova G, van Boven M. Isolation and contact tracing can tip the scale  
11 to containment of COVID-19 in populations with social distancing. *medRxiv*  
12 2020:2020.03.10.20033738. doi: 10.1101/2020.03.10.20033738  
13  
14  
15 25. Keeling MJ, Hollingsworth TD, Read JM. The Efficacy of Contact Tracing for the  
16 Containment of the 2019 Novel Coronavirus (COVID-19). *medRxiv*  
17 2020:2020.02.14.20023036. doi: 10.1101/2020.02.14.20023036  
18  
19  
20 26. Kucharski AJ, Klepac P, Conlan AJK, et al. Effectiveness of isolation, testing, contact  
21 tracing, and physical distancing on reducing transmission of SARS-CoV-2 in different settings:  
22 a mathematical modelling study. *The Lancet Infectious Diseases* 2020;20(10):1151-60. doi:  
23 10.1016/S1473-3099(20)30457-6  
24  
25  
26 27. Ferretti L, Wymant C, Kendall M, et al. Quantifying SARS-CoV-2 transmission suggests  
27 epidemic control with digital contact tracing. *Science* 2020;368(6491):eabb6936. doi:  
28 10.1126/science.abb6936  
29  
30  
31  
32 28. Brook CE, Northrup GR, Ehrenberg AJ, et al. Optimizing COVID-19 control with  
33 asymptomatic surveillance testing in a university environment. *medRxiv* 2021 doi:  
34 10.1101/2020.11.12.20230870 [published Online First: 2021/01/15]  
35  
36  
37 29. Lopman B, Liu CY, Le Guillou A, et al. A modeling study to inform screening and testing  
38 interventions for the control of SARS-CoV-2 on university campuses. *Scientific Reports*  
39 2021;11(1):5900. doi: 10.1038/s41598-021-85252-z  
40  
41  
42 30. Nguyen LKN, Howick S, McLafferty D, et al. Evaluating intervention strategies in  
43 controlling coronavirus disease 2019 (COVID-19) spread in care homes: An agent-based model.  
44 *Infection Control & Hospital Epidemiology* 2020:1-11. doi: 10.1017/ice.2020.1369 [published  
45 Online First: 2020/12/14]  
46  
47  
48 31. Alagoz O, Sethi AK, Patterson BW, et al. Impact of Timing of and Adherence to Social  
49 Distancing Measures on COVID-19 Burden in the US: A Simulation Modeling Approach.  
50 *medRxiv : the preprint server for health sciences* 2020:2020.06.07.20124859. doi:  
51 10.1101/2020.06.07.20124859  
52  
53  
54  
55 32. Chiu WA, Fischer R, Ndeffo-Mbah ML. State-level impact of social distancing and testing  
56 on COVID-19 in the United States. *Res Sq* 2020:rs.3.rs-40364. doi: 10.21203/rs.3.rs-40364/v1  
57  
58  
59  
60

- 1  
2  
3  
4  
5  
6  
7  
8  
9  
10  
11  
12  
13  
14  
15  
16  
17  
18  
19  
20  
21  
22  
23  
24  
25  
26  
27  
28  
29  
30  
31  
32  
33  
34  
35  
36  
37  
38  
39  
40  
41  
42  
43  
44  
45  
46  
47  
48  
49  
50  
51  
52  
53  
54  
55  
56  
57  
58  
59  
60
33. McCombs A, Kadelka C. A model-based evaluation of the efficacy of COVID-19 social distancing, testing and hospital triage policies. *PLOS Computational Biology* 2020;16(10):e1008388. doi: 10.1371/journal.pcbi.1008388
34. Jenness SM, Goodreau SM, Morris M. EpiModel: An R Package for Mathematical Modeling of Infectious Disease over Networks. *J Stat Softw* 2018;84 doi: 10.18637/jss.v084.i08 [published Online First: 2018/05/08]
35. Danon L, Ford AP, House T, et al. Networks and the Epidemiology of Infectious Disease. *Interdisciplinary Perspectives on Infectious Diseases* 2011;2011:284909. doi: 10.1155/2011/284909
36. Mossong J, Hens N, Jit M, et al. Social contacts and mixing patterns relevant to the spread of infectious diseases. *PLoS Med* 2008;5(3):e74. doi: 10.1371/journal.pmed.0050074 [published Online First: 2008/03/28]
37. Ameri K, Cooper KD. A Network-Based Compartmental Model For The Spread Of Whooping Cough In Nebraska. *AMIA Jt Summits Transl Sci Proc* 2019;2019:388-97. [published Online First: 2019/07/02]
38. van der Pol J. Introduction to Network Modeling Using Exponential Random Graph Models (ERGM): Theory and an Application Using R-Project. *Computational Economics* 2019;54(3):845-75. doi: 10.1007/s10614-018-9853-2
39. Russell TW, Hellewell J, Jarvis CI, et al. Estimating the infection and case fatality ratio for coronavirus disease (COVID-19) using age-adjusted data from the outbreak on the Diamond Princess cruise ship, February 2020. LID - 10.2807/1560-7917.ES.2020.25.12.2000256 [doi] LID - 2000256. (1560-7917 (Electronic))
40. Wang D, Hu B, Hu C, et al. Clinical Characteristics of 138 Hospitalized Patients With 2019 Novel Coronavirus–Infected Pneumonia in Wuhan, China. *JAMA* 2020;323(11):1061-69. doi: 10.1001/jama.2020.1585
41. Organization WH. Report of the WHO-China Joint Mission on Conronavirus Disease 2019(COVID-19), 2020.
42. Liu Y, Yan L-M, Wan L, et al. Viral dynamics in mild and severe cases of COVID-19. *The Lancet Infectious Diseases* 2020;20(6):656-57. doi: 10.1016/S1473-3099(20)30232-2
43. Huang C, Wang Y, Li X, et al. Clinical features of patients infected with 2019 novel coronavirus in Wuhan, China. *The Lancet* 2020;395(10223):497-506. doi: 10.1016/S0140-6736(20)30183-5

- 1  
2  
3 44. Chan JF-W, Yuan S, Kok K-H, et al. A familial cluster of pneumonia associated with the  
4 2019 novel coronavirus indicating person-to-person transmission: a study of a family cluster.  
5 *The Lancet* 2020;395(10223):514-23. doi: 10.1016/S0140-6736(20)30154-9  
6  
7  
8  
9 45. Bhatraju PK, Ghassemieh BJ, Nichols M, et al. Covid-19 in Critically Ill Patients in the  
10 Seattle Region — Case Series. *New England Journal of Medicine* 2020;382(21):2012-22. doi:  
11 10.1056/NEJMoa2004500  
12  
13  
14 46. Li Q, Guan X, Wu P, et al. Early Transmission Dynamics in Wuhan, China, of Novel  
15 Coronavirus-Infected Pneumonia. (1533-4406 (Electronic))  
16  
17  
18 47. Organization WH. Coronavirus disease 2019 (COVID-19) Situation Report – 73: World  
19 Health Organization, 2020.  
20  
21  
22 48. admin. Fitting the parameters of an SIR model to influenza data using Least Squares and  
23 the graphical Monte Carlo method 2013 [Available from:  
24 [http://sherrytowers.com/2013/01/29/neiu-lecture-vi-fitting-the-parameters-of-an-sir-model-to-](http://sherrytowers.com/2013/01/29/neiu-lecture-vi-fitting-the-parameters-of-an-sir-model-to-influenza-data/)  
25 [influenza-data/](http://sherrytowers.com/2013/01/29/neiu-lecture-vi-fitting-the-parameters-of-an-sir-model-to-influenza-data/).  
26  
27  
28 49. Max Roser HR, Esteban Ortiz-Ospina and Joe Hasell. owidcoronavirus. *Our World in Data*  
29 2020  
30  
31  
32 50. David Lazer MAB, Katherine Ognyanova, John Della Volpe. The State of the nation: A 50-  
33 state COVID-19 survey, 2020:298.  
34  
35  
36 51. Guo Z. Beijing have tested over 2.948 million people [News]. News China; 2020 [updated  
37 2020-06-23. Available from: [http://news.china.com.cn/txt/2020-06/23/content\\_76195219.htm](http://news.china.com.cn/txt/2020-06/23/content_76195219.htm).  
38  
39  
40 52. Ziqi W. All Negative! Xinfadi market has completed 5803 swabs for testing results:  
41 ZhongHong; [Available from:  
42 <https://baijiahao.baidu.com/s?id=1669485198569240379&wfr=spider&for=pc2020-06-14>.  
43  
44  
45 53. Junlu W. Beijing opened extensive nucleic acid testing among key population groups and  
46 those who volunteer to get tested: The Xinhua News Agency; 2020 [Available from:  
47 [http://www.xinhuanet.com/2020-04/20/c\\_1125877832.htm](http://www.xinhuanet.com/2020-04/20/c_1125877832.htm) accessed 2020-06-19.  
48  
49  
50 54. China NHCotPsRo. Daily Report of COVID-19 2020 [Available from:  
51 [http://www.nhc.gov.cn/xcs/xxgzbd/gzbd\\_index.shtml](http://www.nhc.gov.cn/xcs/xxgzbd/gzbd_index.shtml).  
52  
53  
54  
55  
56

## 57 Licence statement

58  
59  
60

1  
2  
3 I, the Submitting Author has the right to grant and does grant on behalf of all authors of the  
4 WorkWork (as defined in the below author licence), an exclusive licence and/or a non-  
5 exclusive licence for contributions from authors who are: i) UK Crown employees; ii) where  
6 BMJ has agreed a CC-BY licence shall apply, and/or iii) in accordance with the terms  
7 applicable for US Federal Government officers or employees acting as part of their official  
8 duties; on a worldwide, perpetual, irrevocable, royalty-free basis to BMJ Publishing Group Ltd  
9 (“BMJ”) its licensees and where the relevant Journal is co-owned by BMJ to the co-owners of  
10 the Journal, to publish the Work in BMJ Open and any other BMJ products and to exploit all  
11 rights, as set out in our licence.  
12  
13  
14  
15  
16

17 The Submitting Author accepts and understands that any supply made under these terms is  
18 made by BMJ to the Submitting Author unless you are acting as an employee on behalf of your  
19 employer or a postgraduate student of an affiliated institution which is paying any applicable  
20 article publishing charge (“APC”) for Open Access articles. Where the Submitting Author  
21 wishes to make the Work available on an Open Access basis (and intends to pay the relevant  
22 APC), the terms of reuse of such Open Access shall be governed by a Creative Commons  
23 licence details of these licences and which Creative Commons licence will apply to this  
24 Work are set out in our licence referred to above.  
25  
26  
27  
28  
29  
30  
31  
32  
33  
34  
35  
36  
37  
38  
39  
40  
41  
42  
43  
44  
45  
46  
47  
48  
49  
50  
51  
52  
53  
54  
55  
56  
57  
58  
59  
60

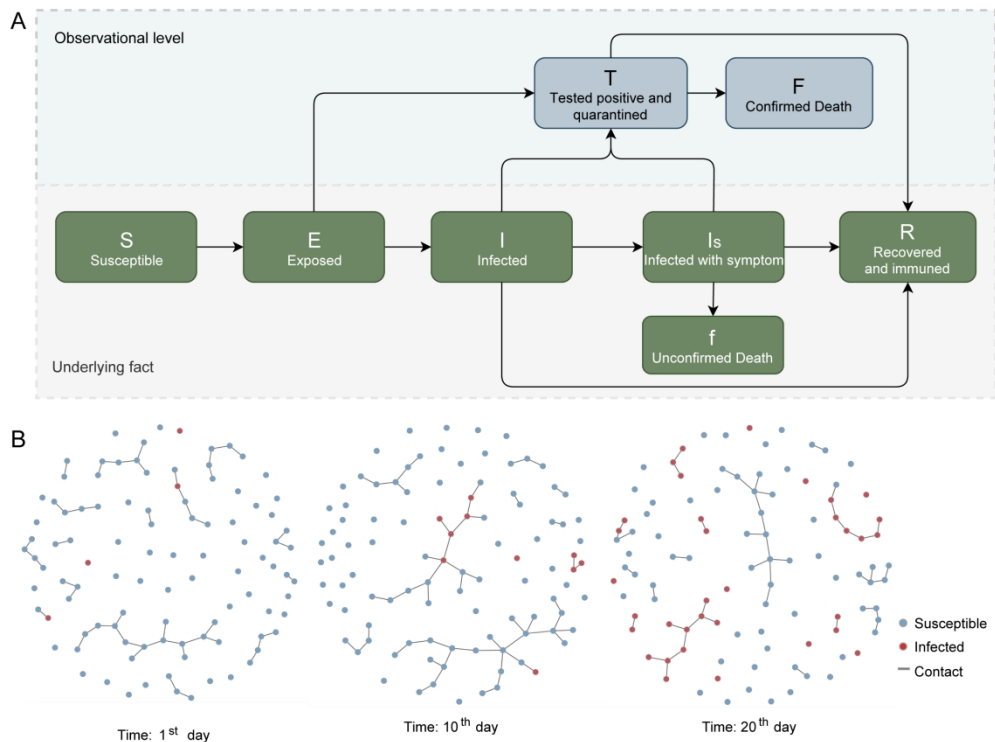

Figure 1. Introduction of the CoTECT model. (A) Structure of the network-based epidemiological model CoTECT. (B) Abbreviated version of the infection network progression. Snapshots shown are days 0, 10 and 20 after the first infected individual. Red and blue dots represent infected and susceptible individuals, respectively. Strings represent contact relationships.



- B**
- Baseline
  - Testing and tracing contact with 2-week delay
  - Testing and tracing contact with 4-week delay
  - Testing symptomatic case only with 4-week delay

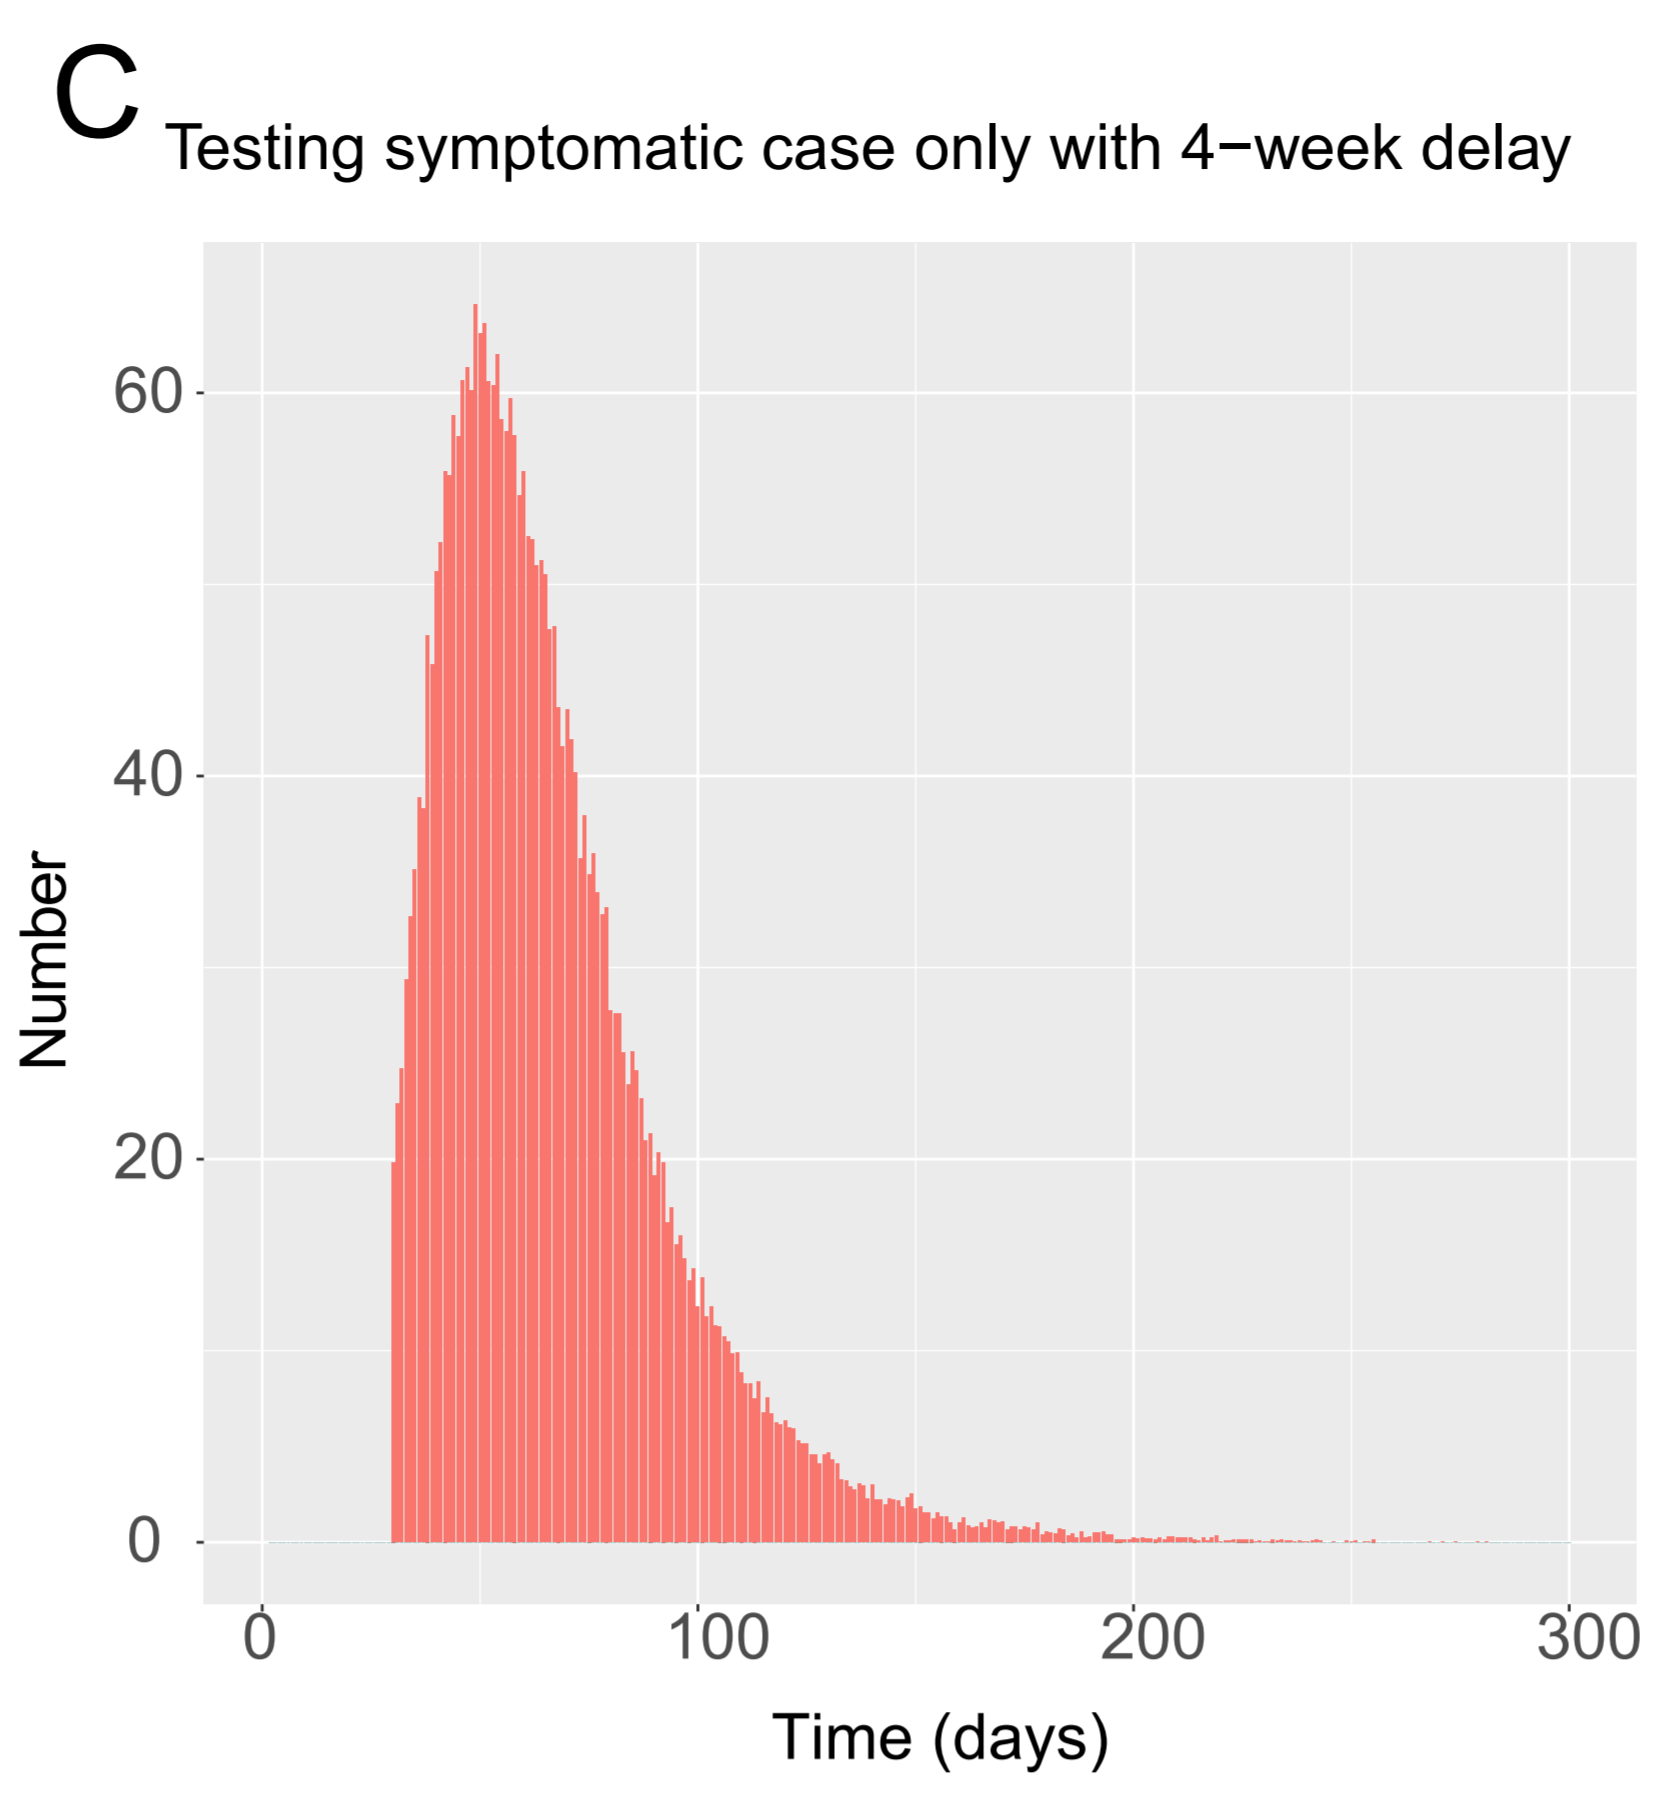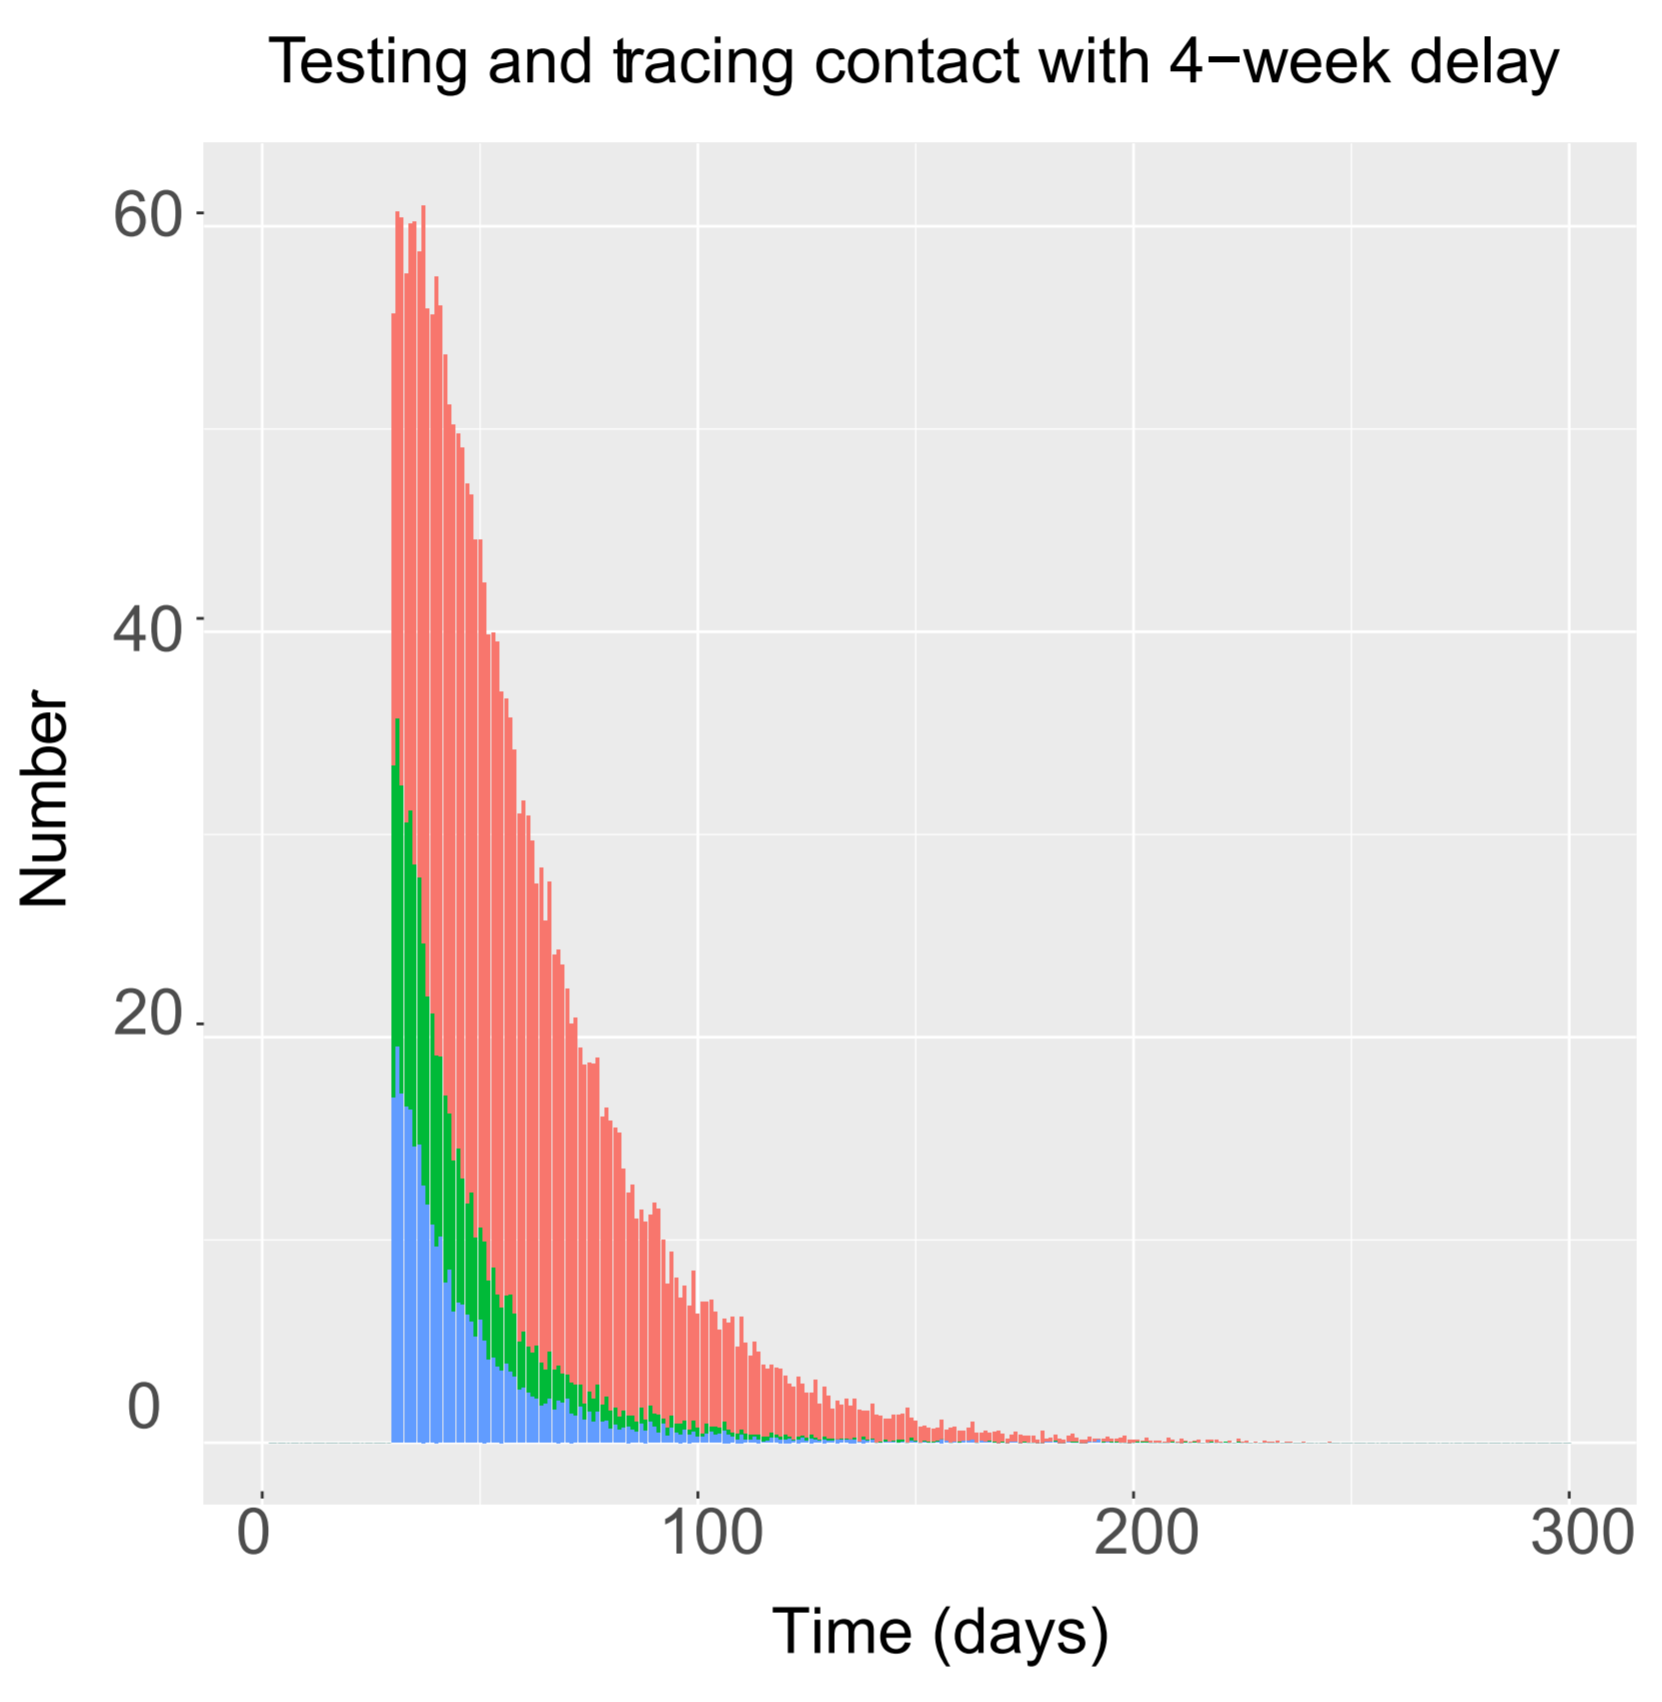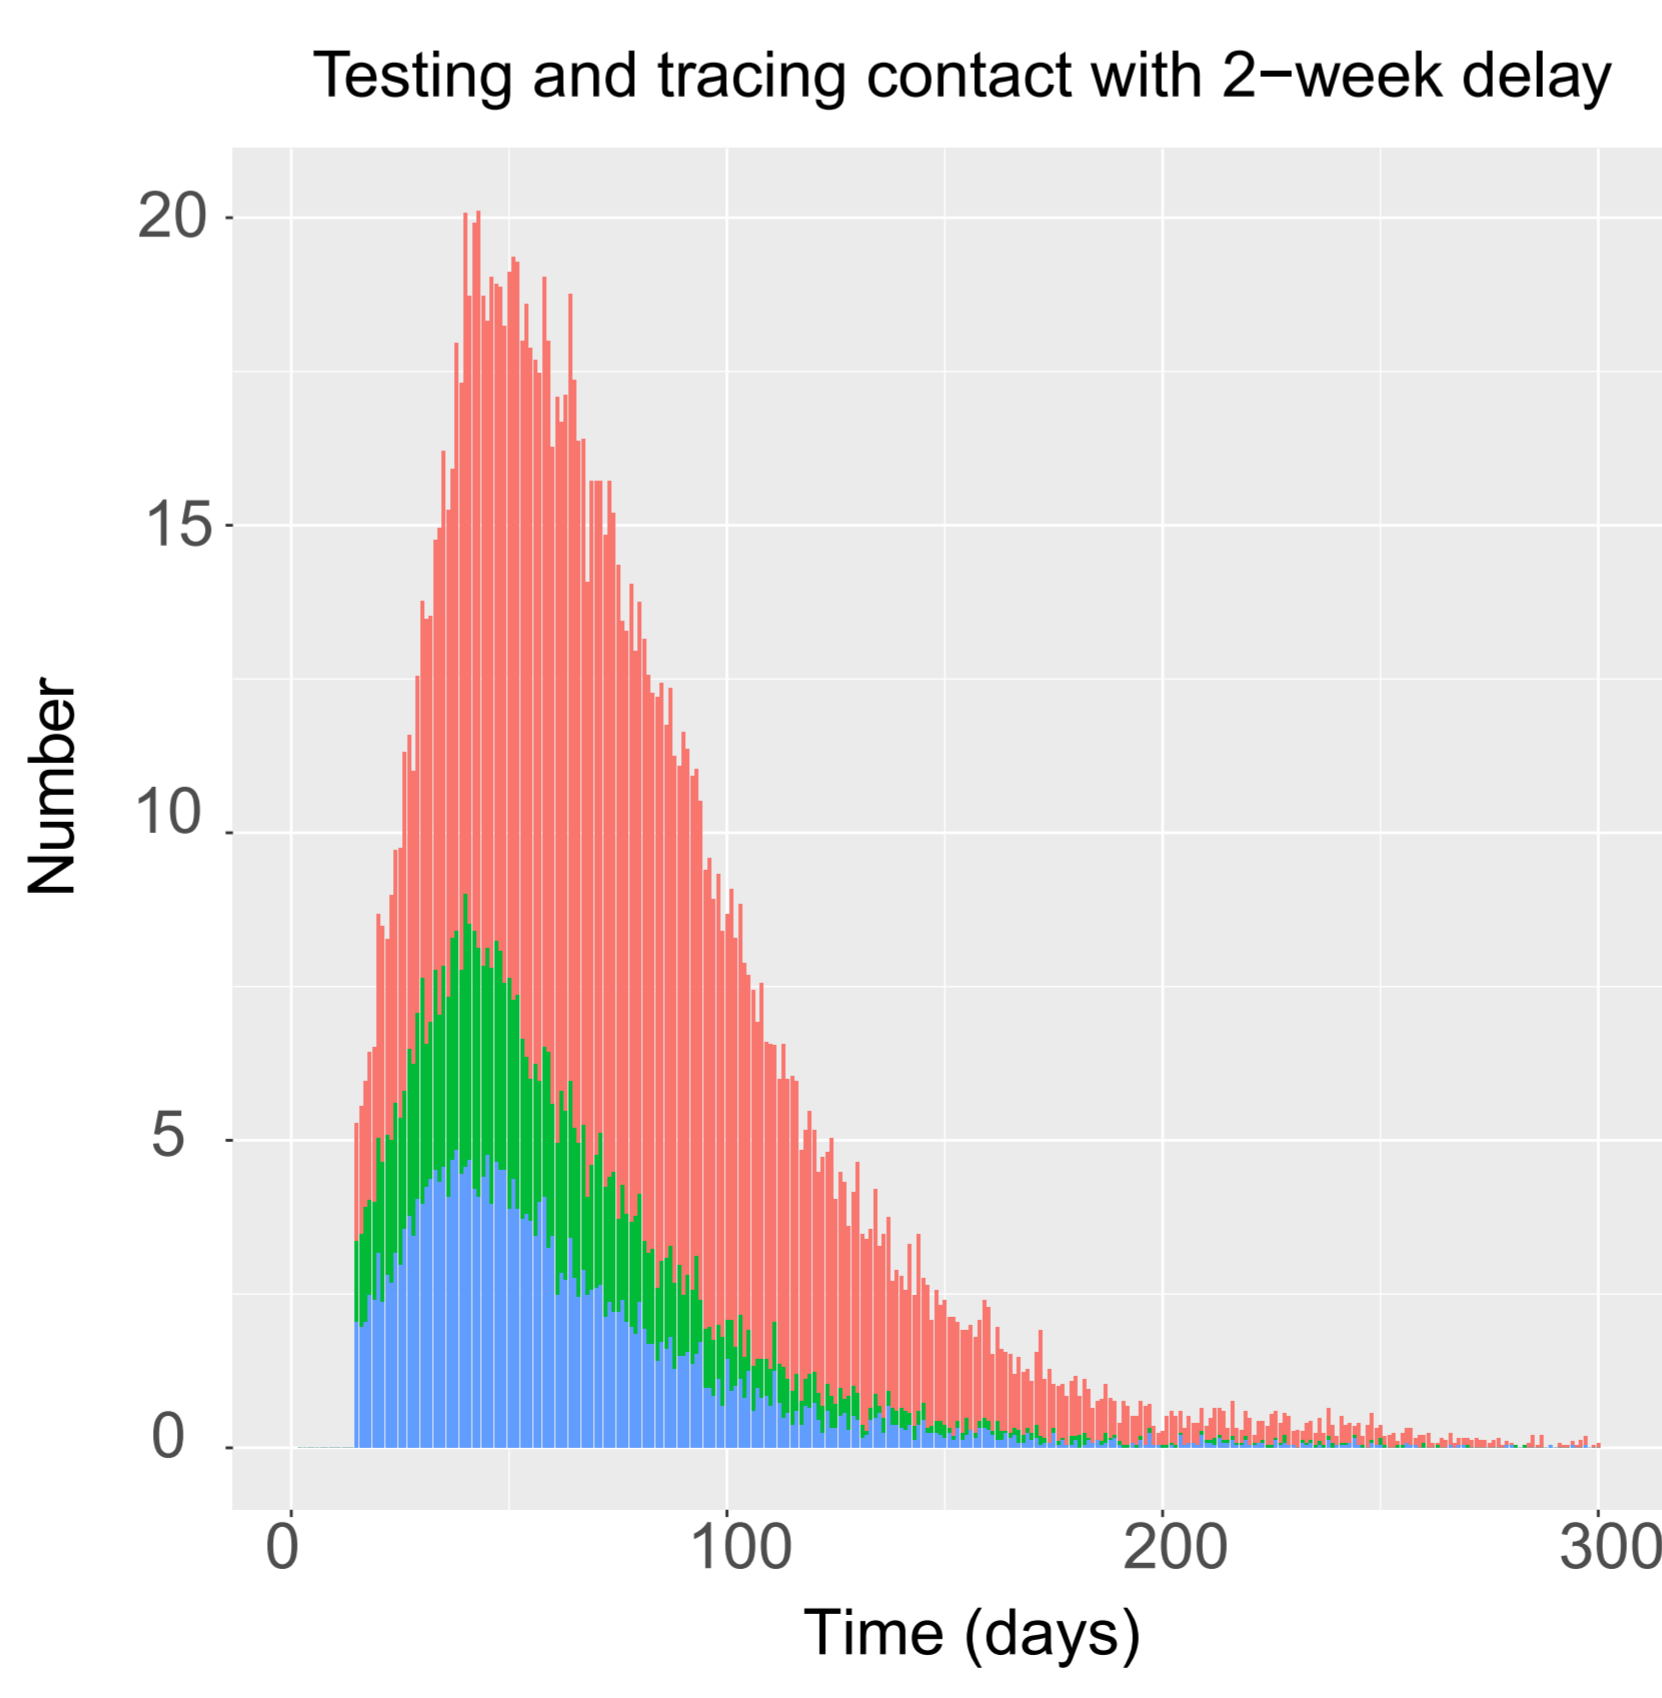

- Is in daily new confirmed cases
- I in daily new confirmed cases
- E in daily new confirmed cases

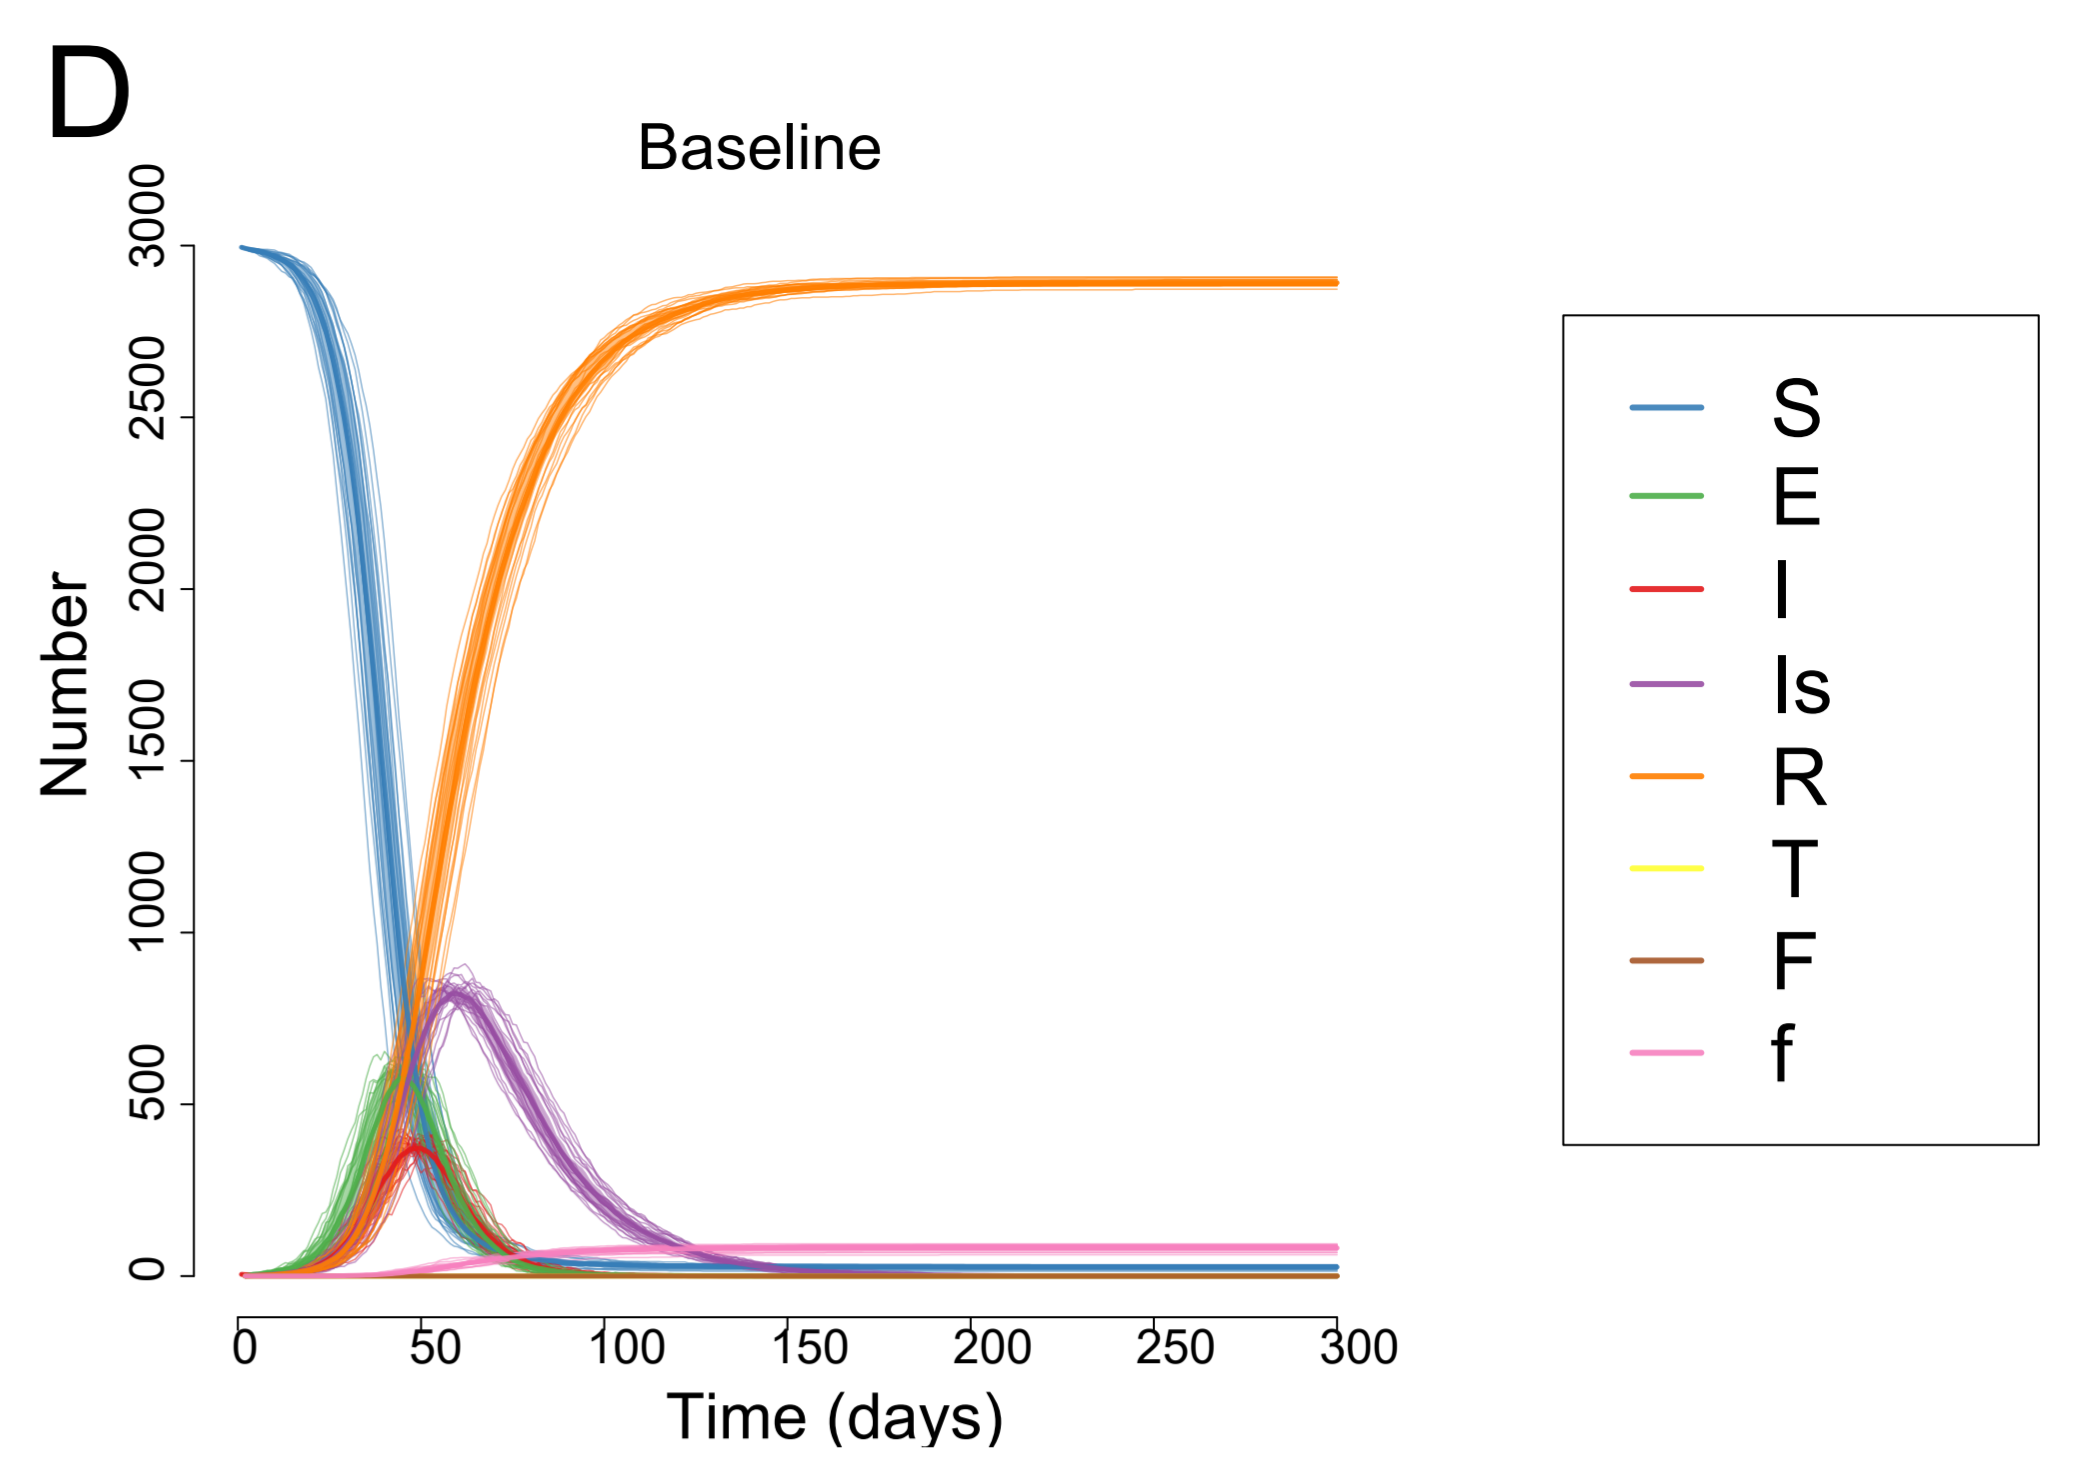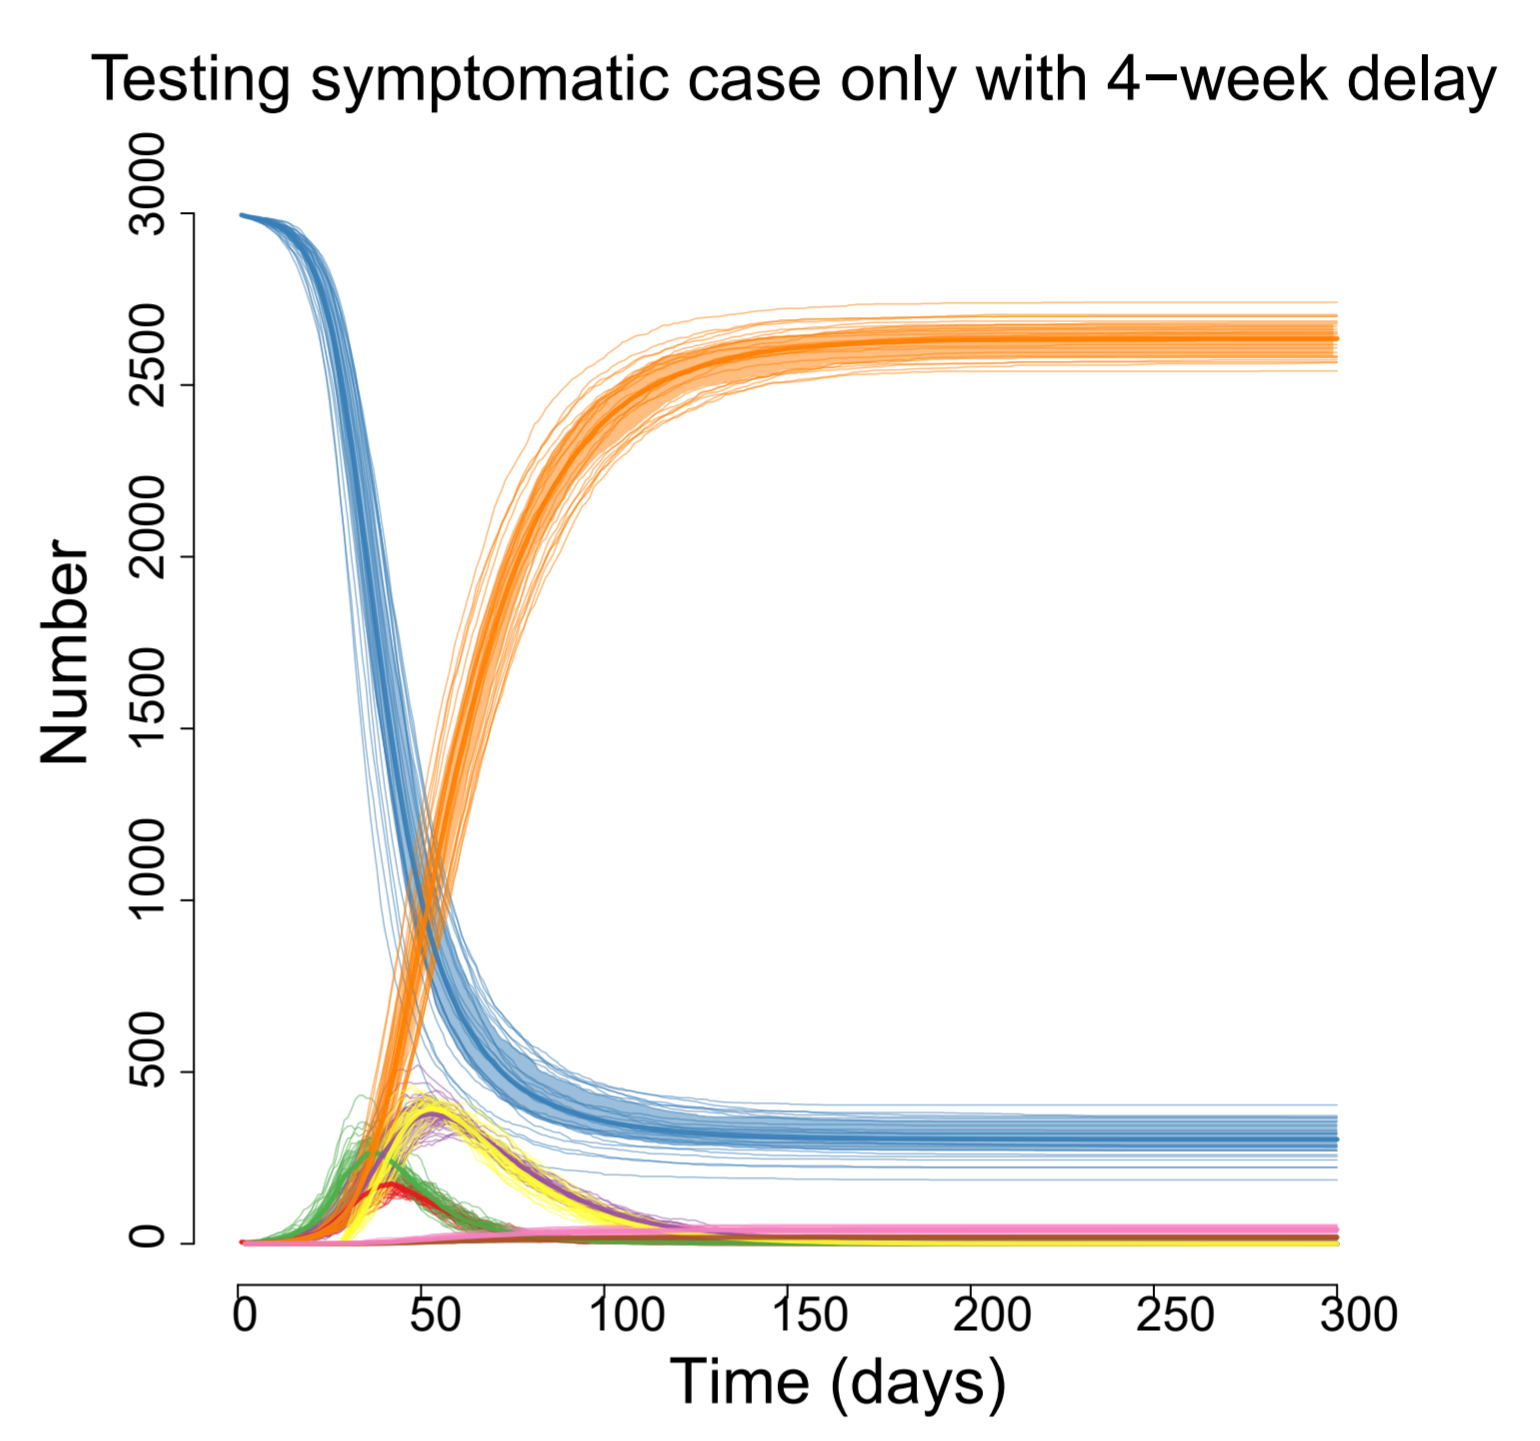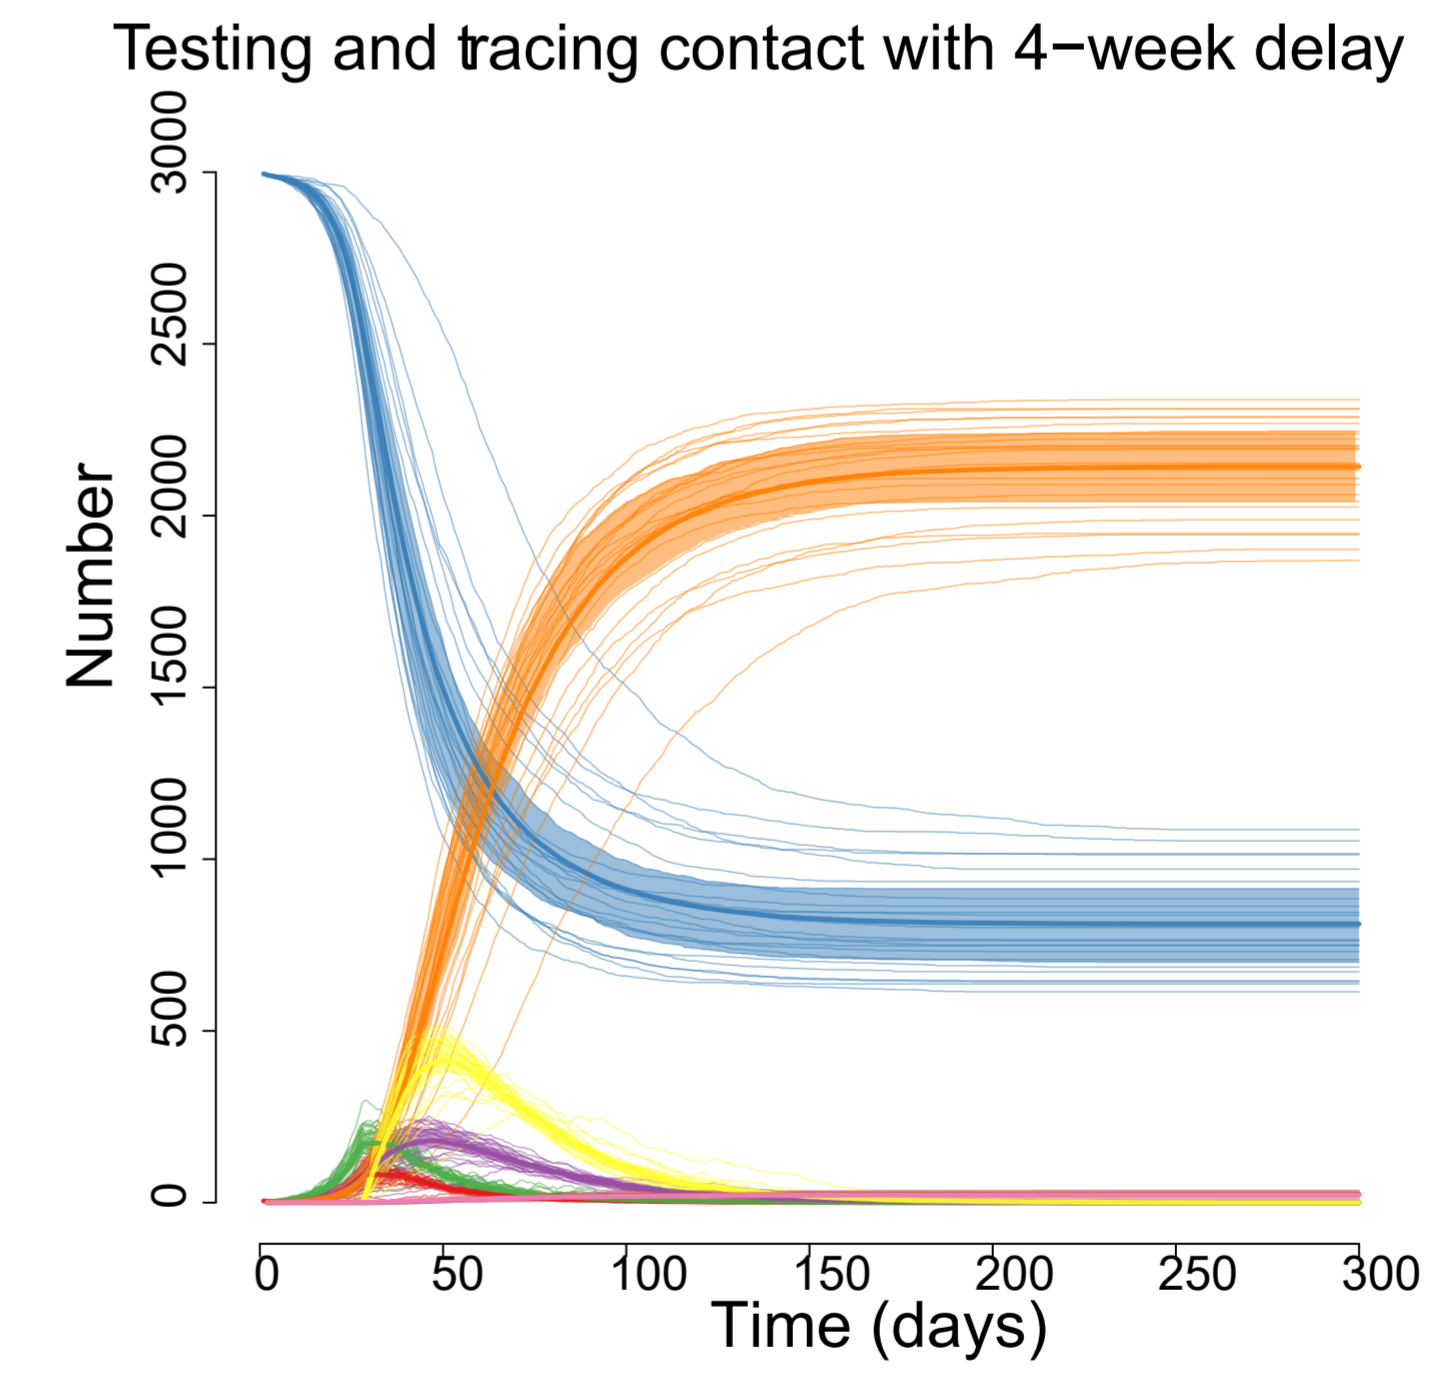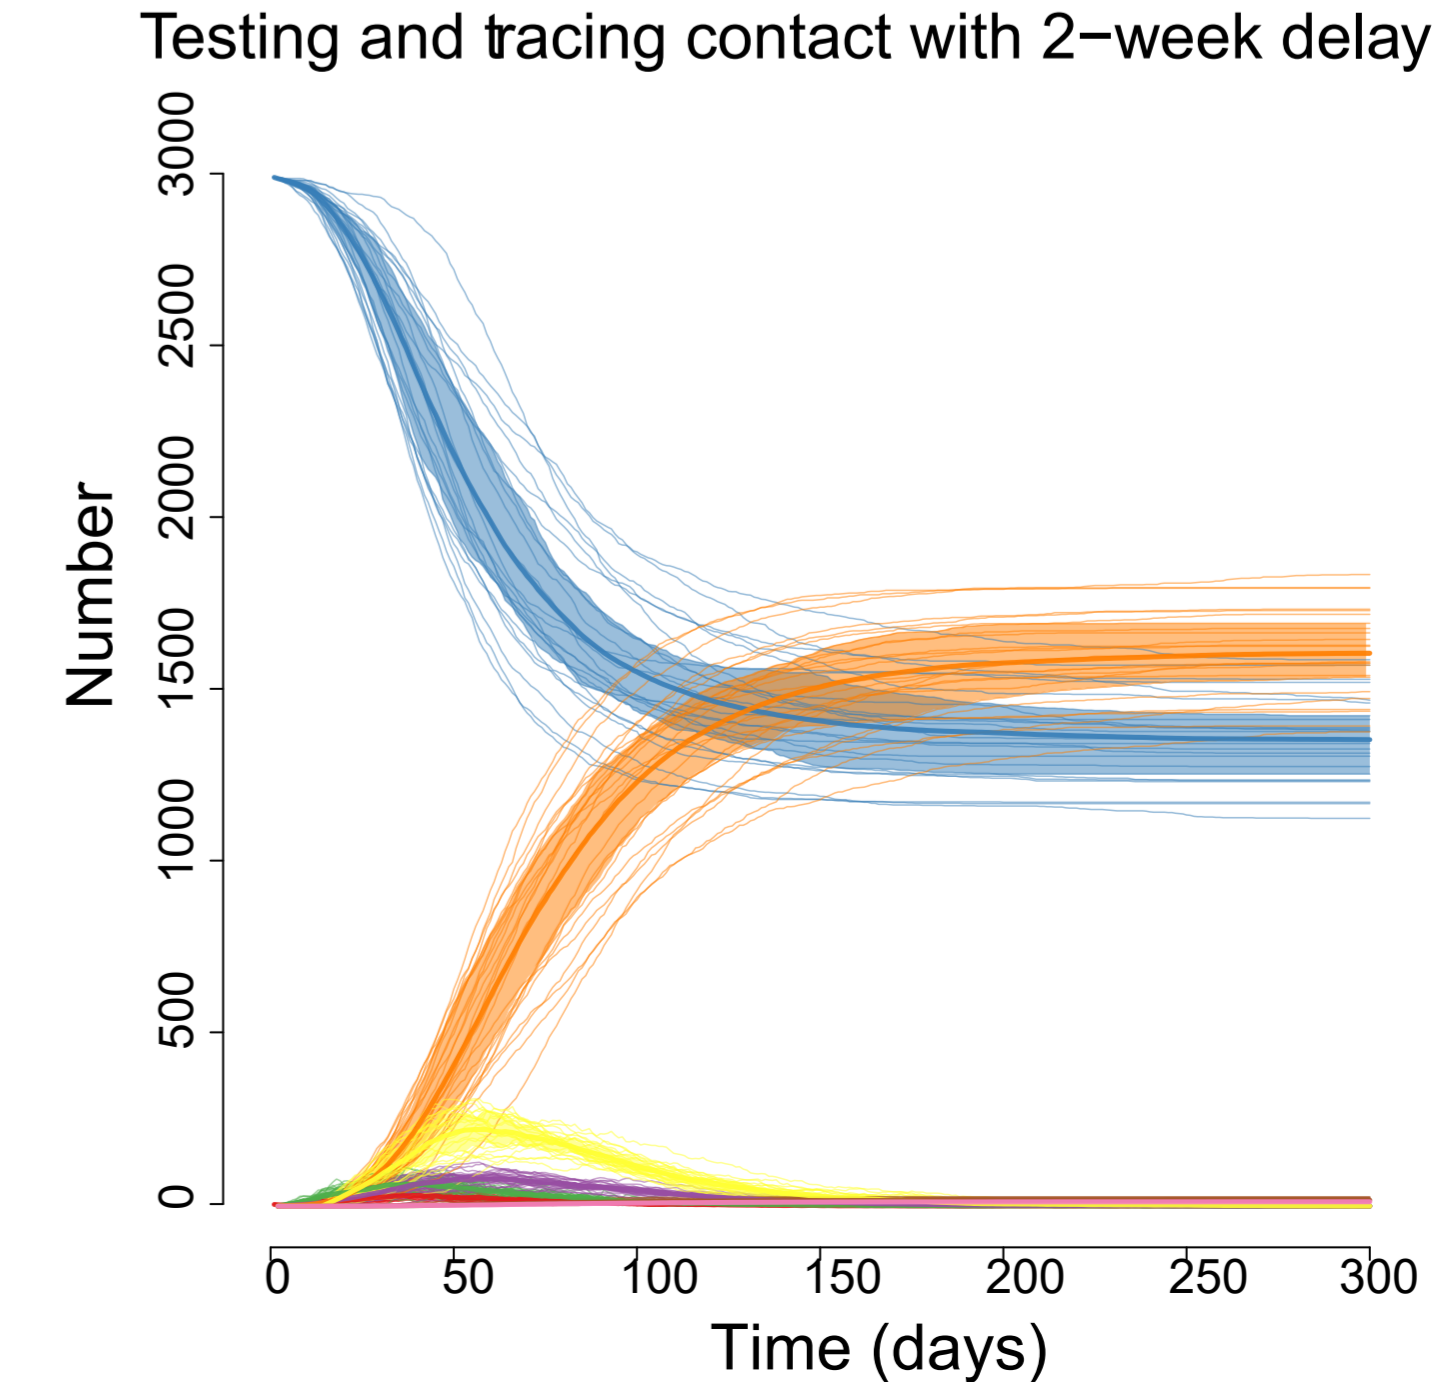



# A. Scenario 1

1  
2  
3  
4  
5  
6  
7  
8  
9  
10  
11  
12  
13  
14  
15  
16  
17  
18  
19  
20  
21  
22  
23  
24  
25  
26  
27  
28  
29  
30  
31  
32  
33  
34  
35  
36  
37  
38  
39  
40  
41  
42  
43  
44  
45  
46  
47  
48  
49  
50

Experiment ■ IsT rate: 1/4 ■ IsT rate: 1/6 ■ IsT rate: 1/8 ■ IsT rate: 1/10 ■ IsT rate: 1/12

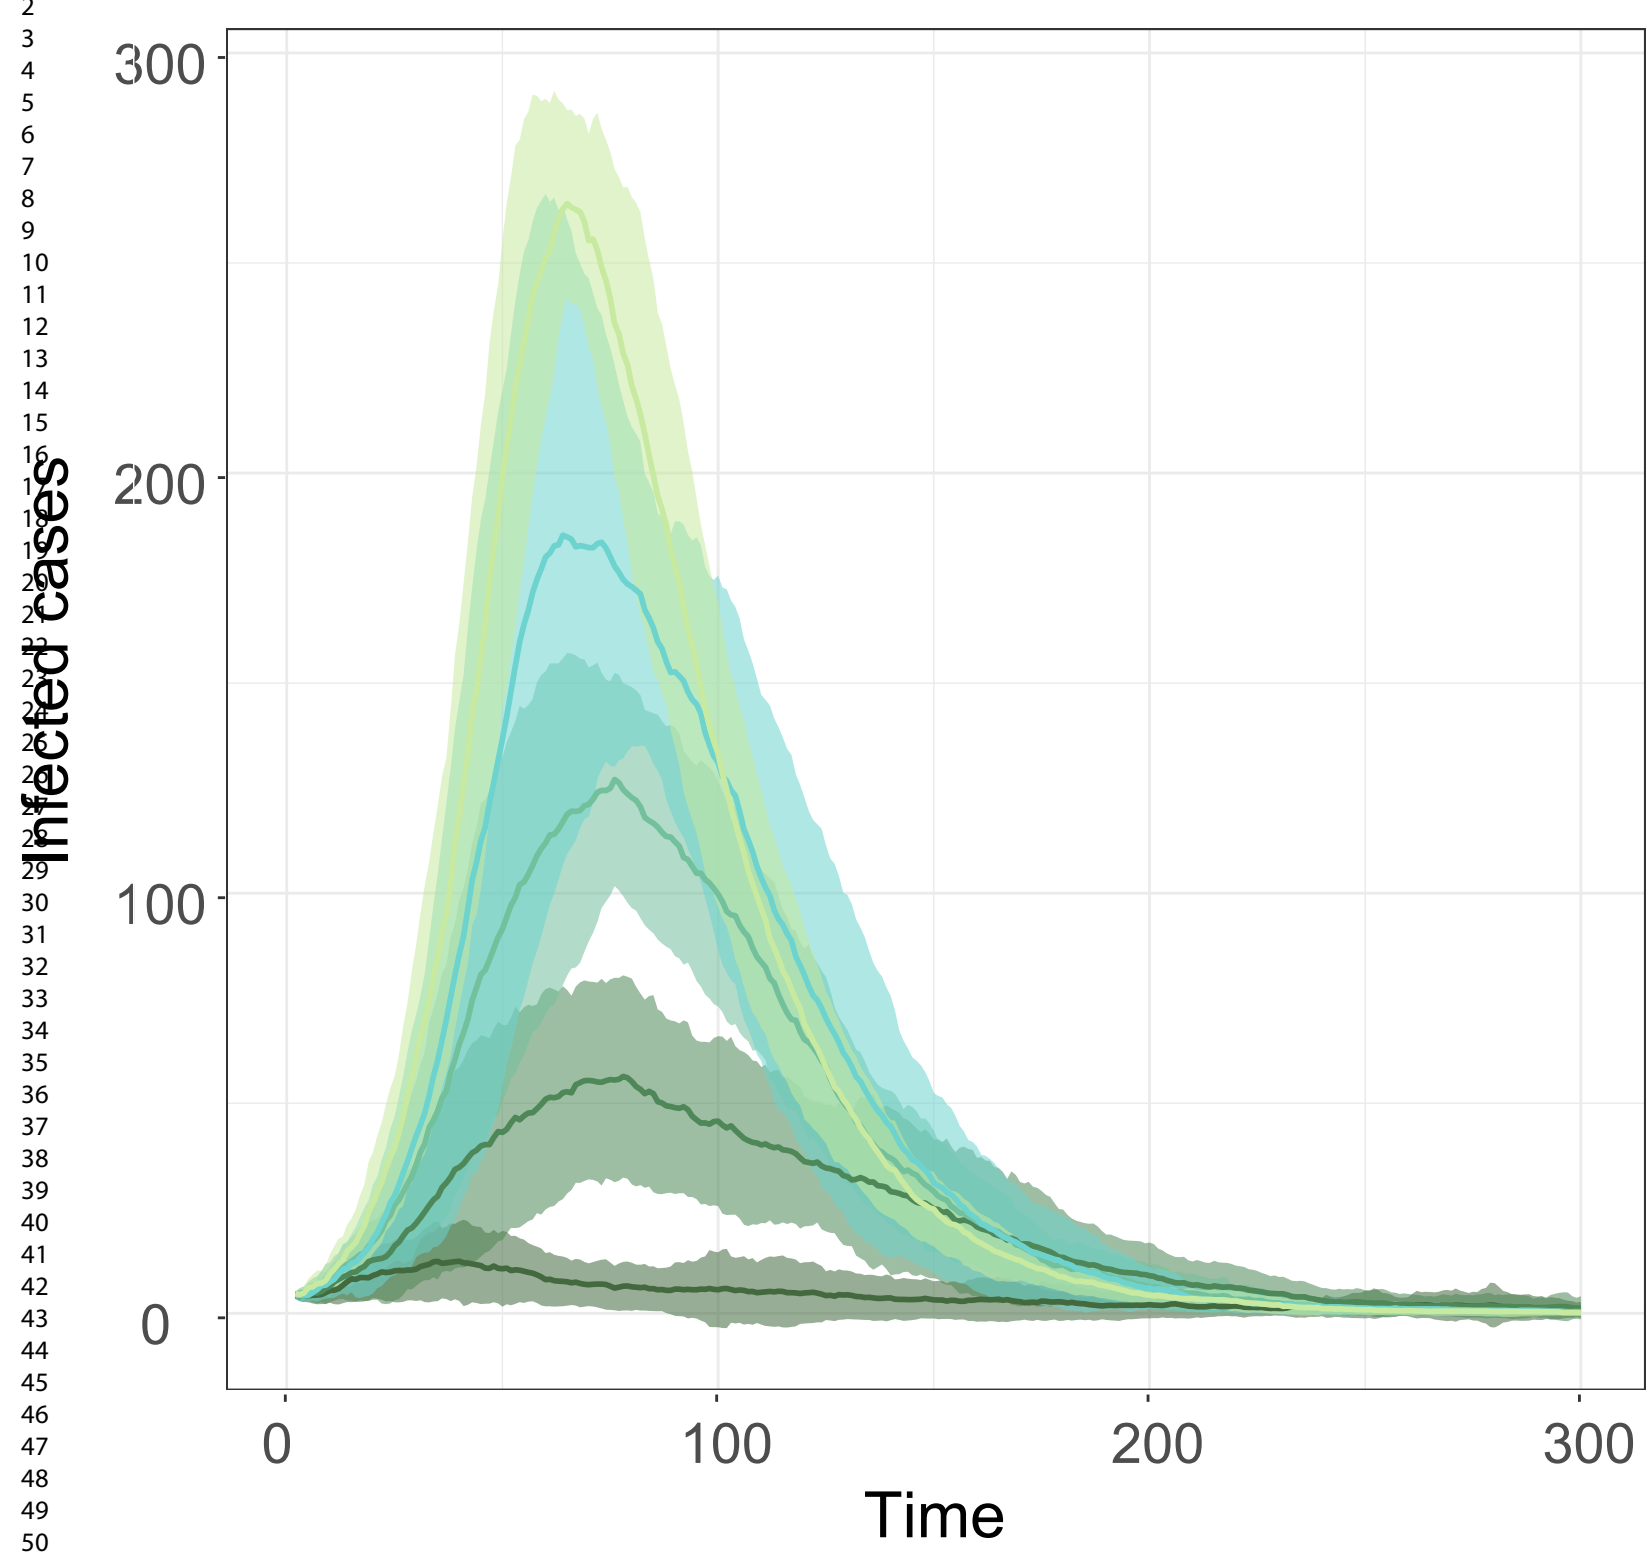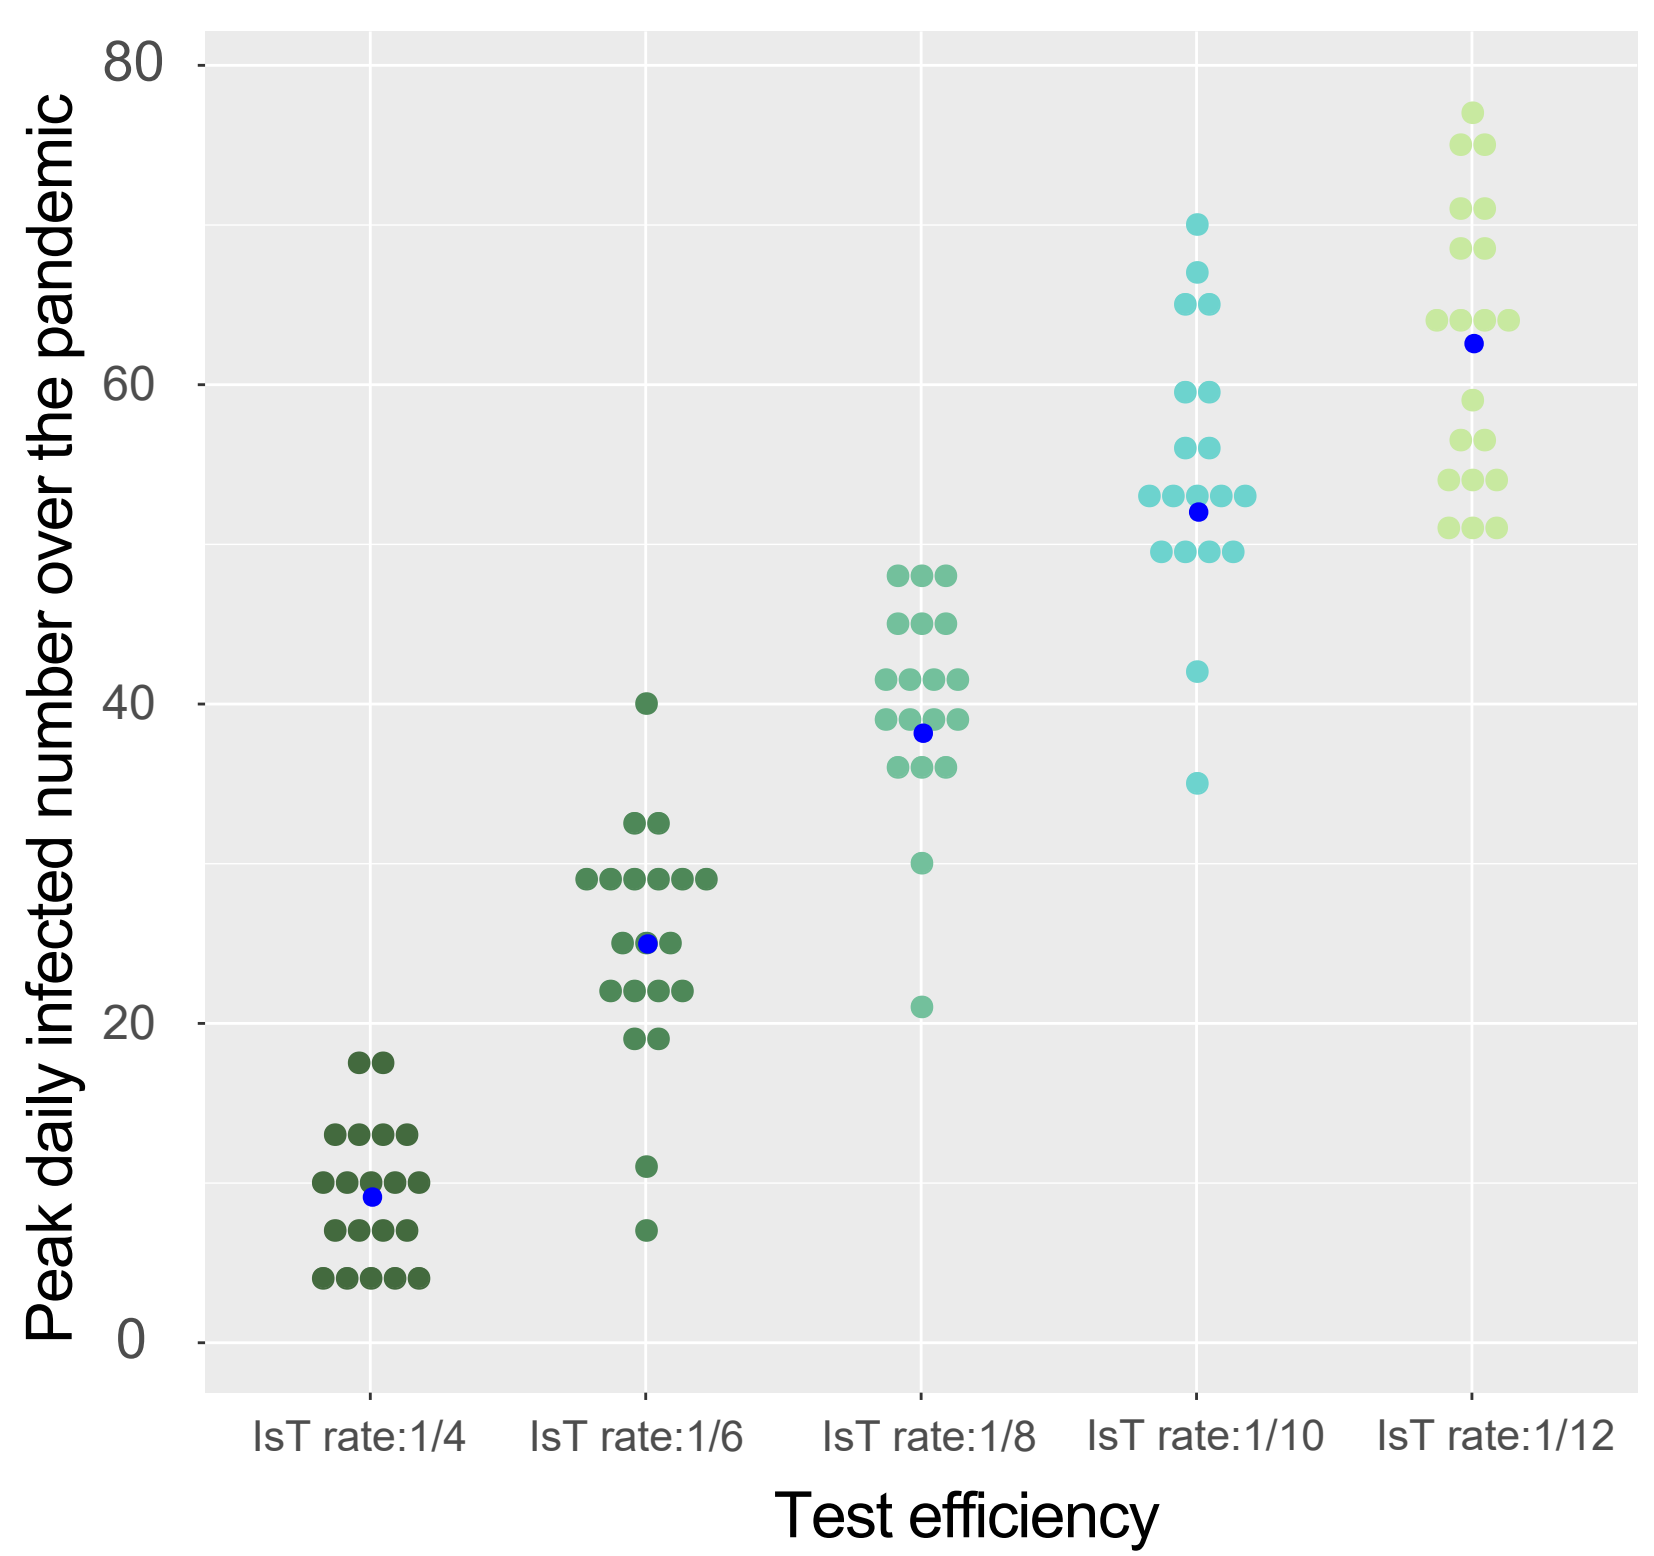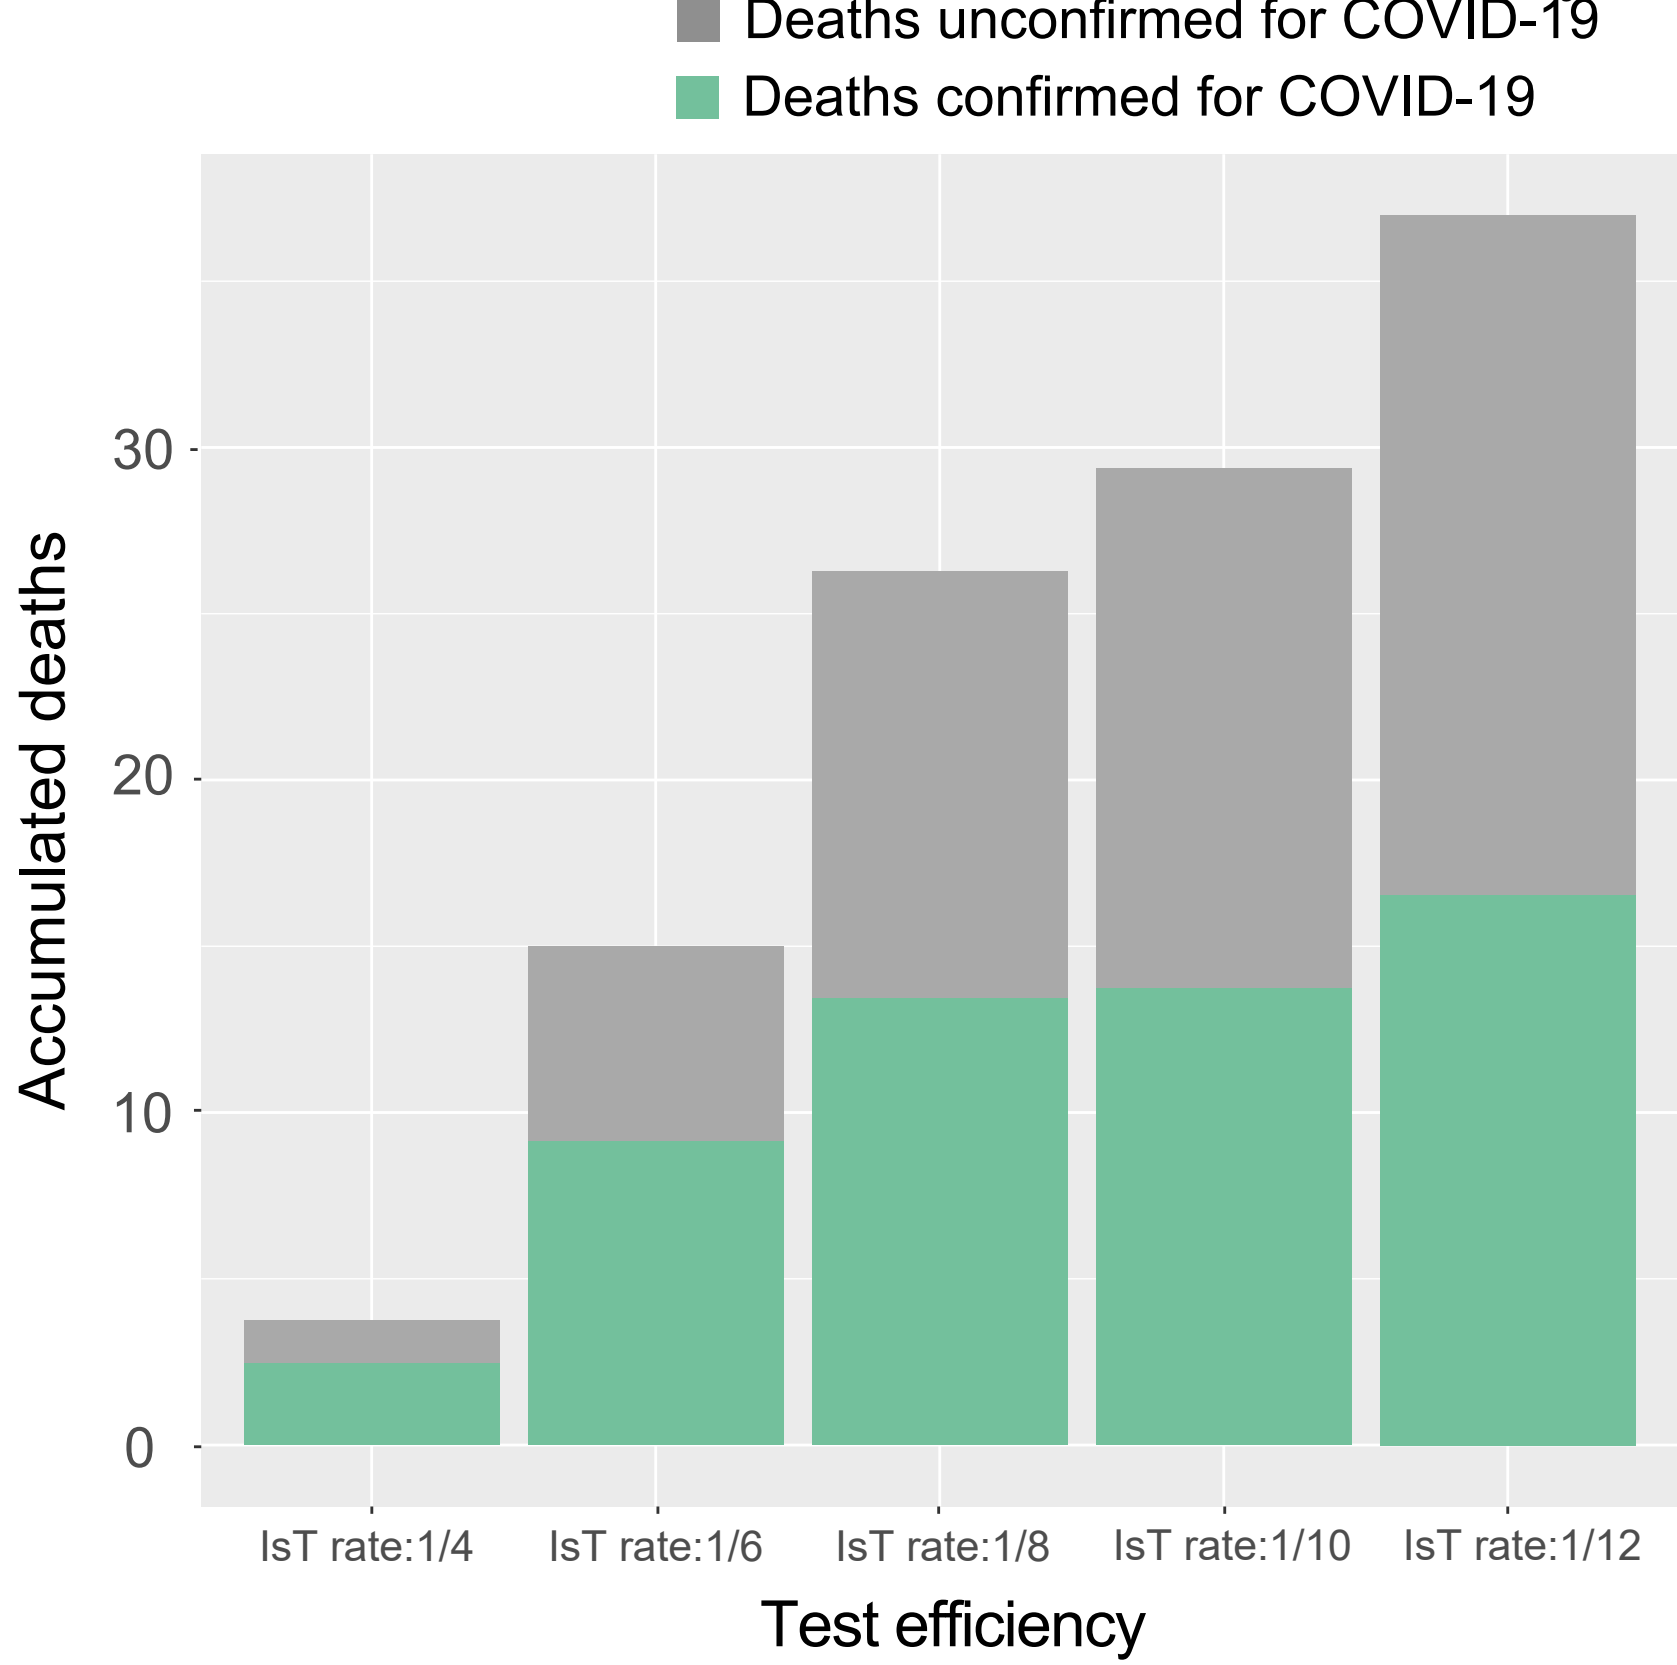

# B. Scenario 2

51  
52  
53  
54  
55  
56  
57  
58  
59  
60  
61  
62  
63  
64  
65  
66

Experiment ■ IT rate: 1/12 ■ IT rate: 1/19 ■ IT rate: 0 (No Tracing)

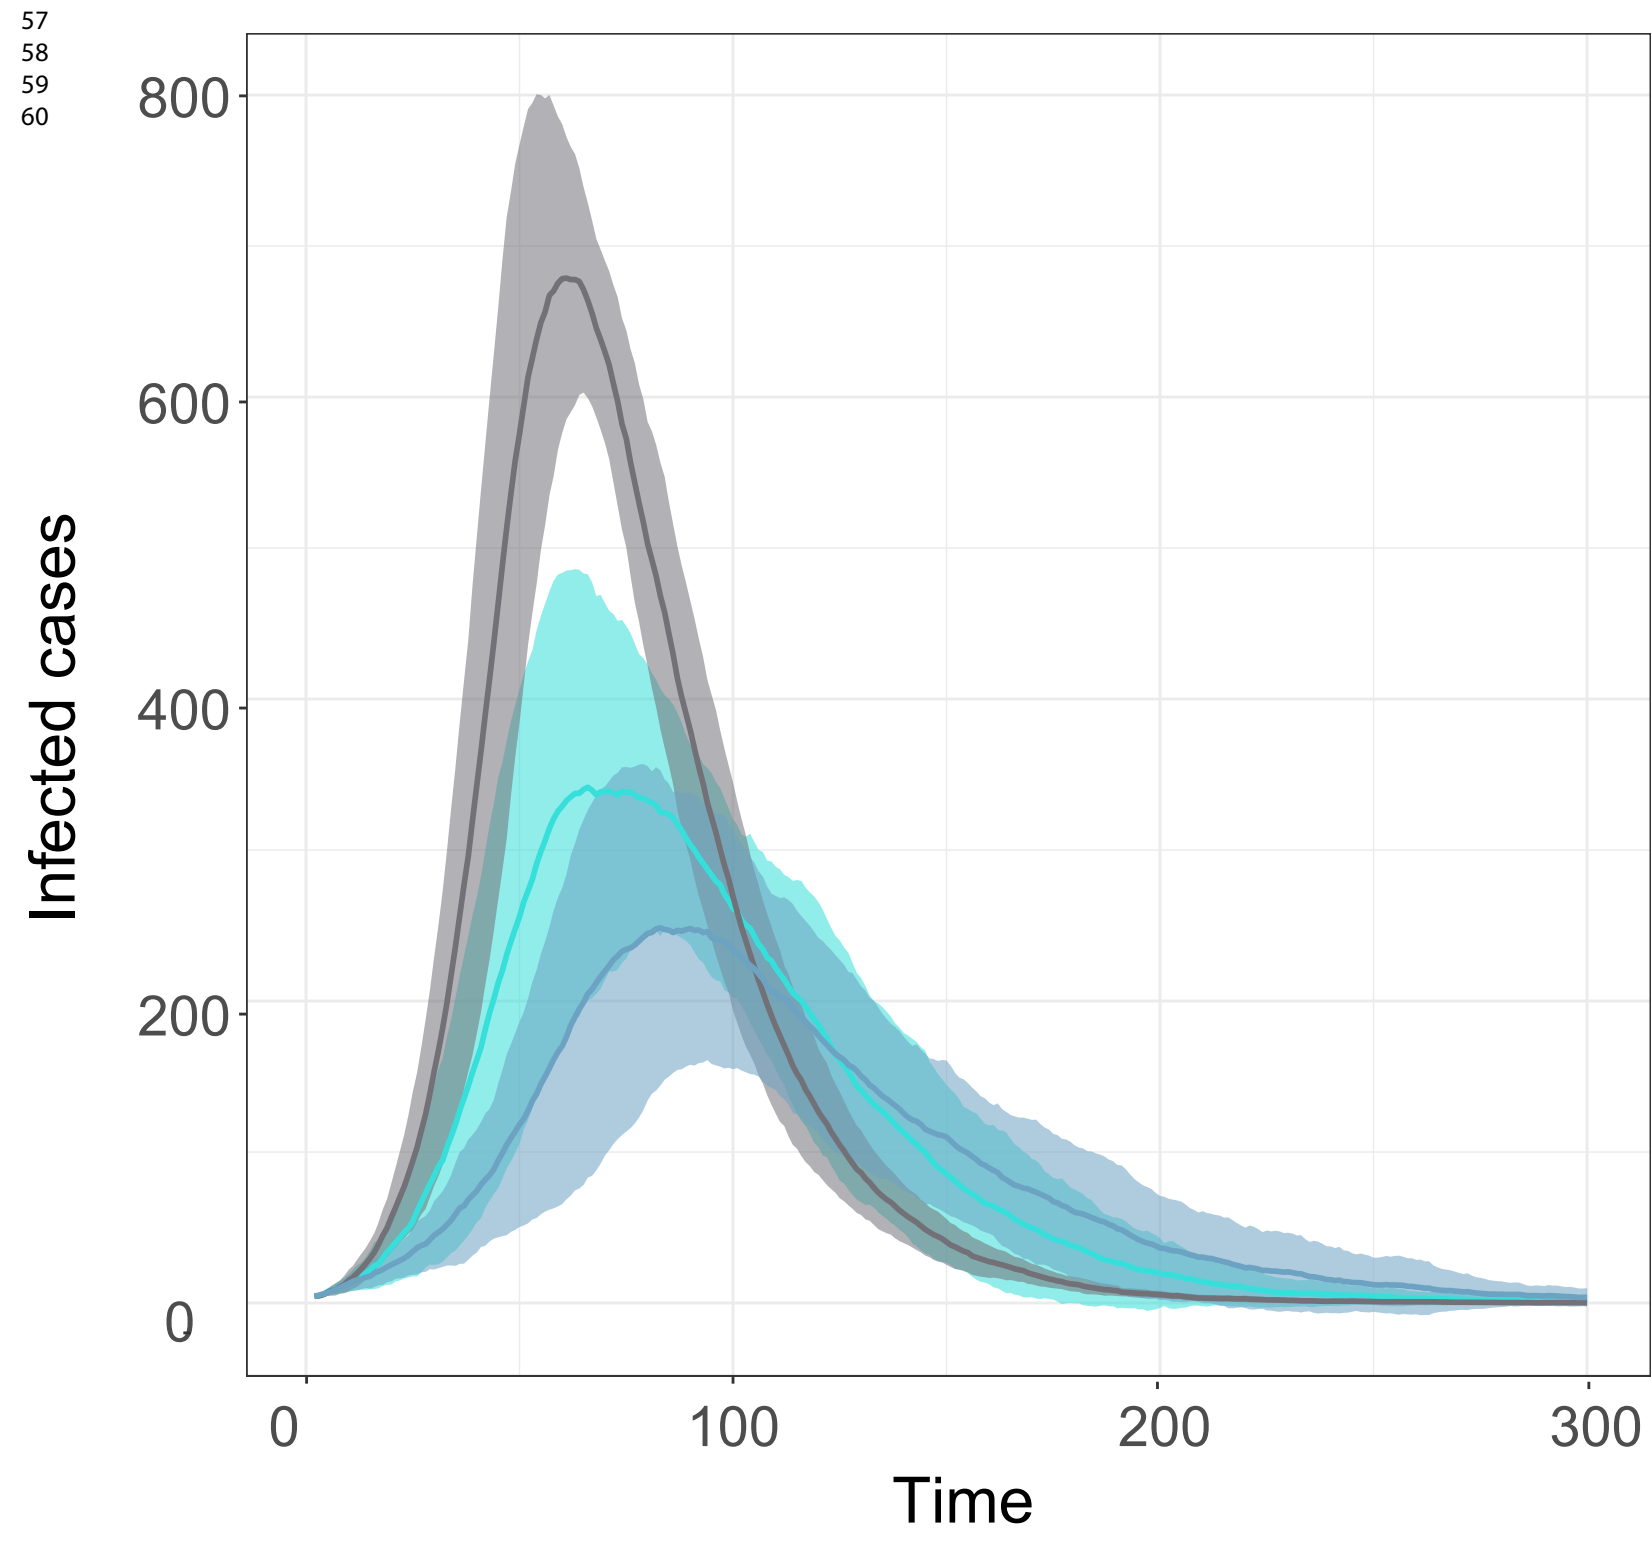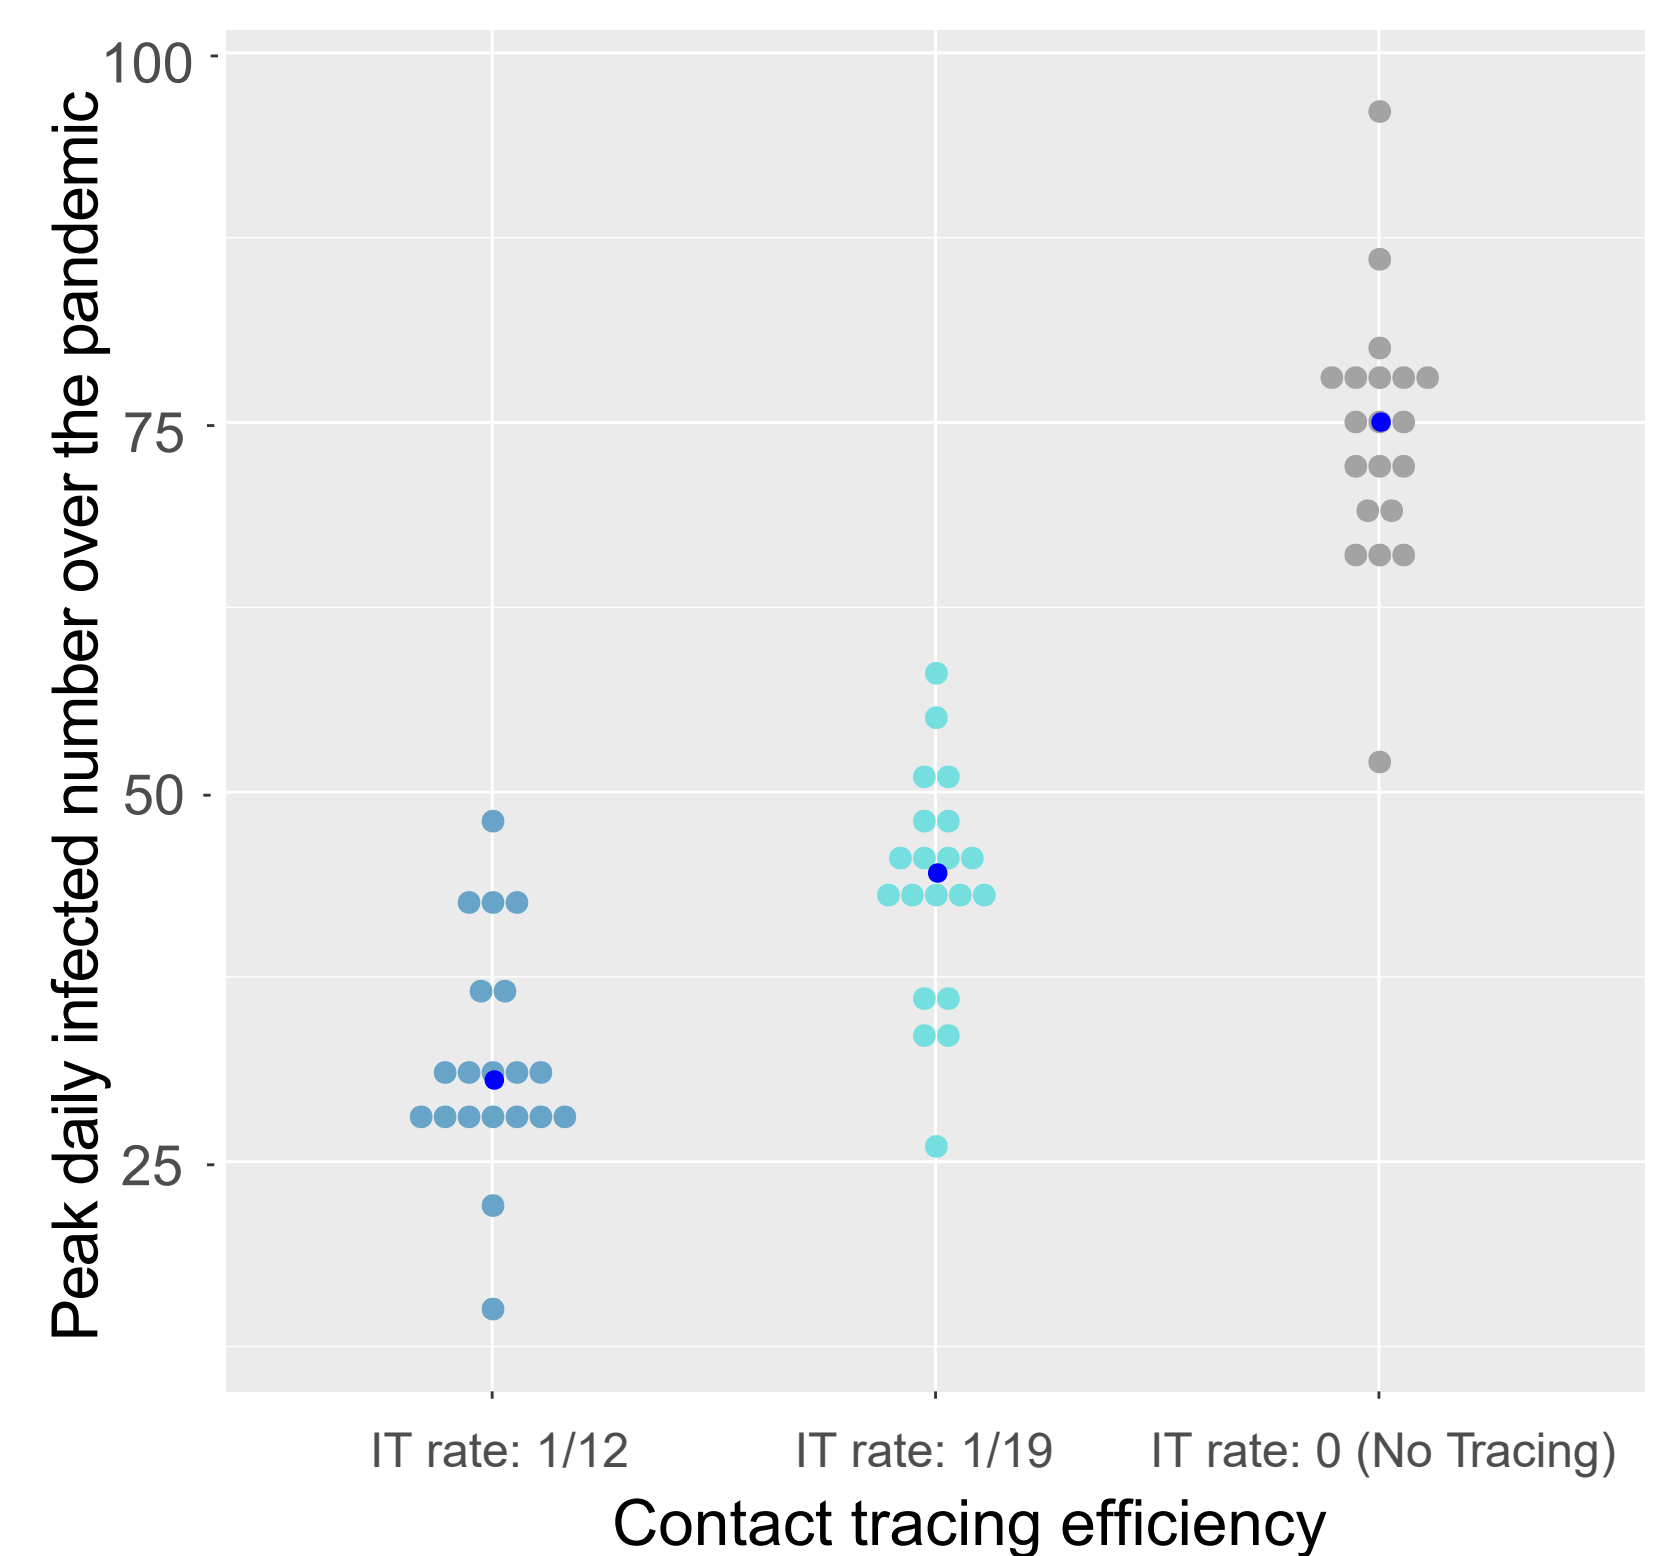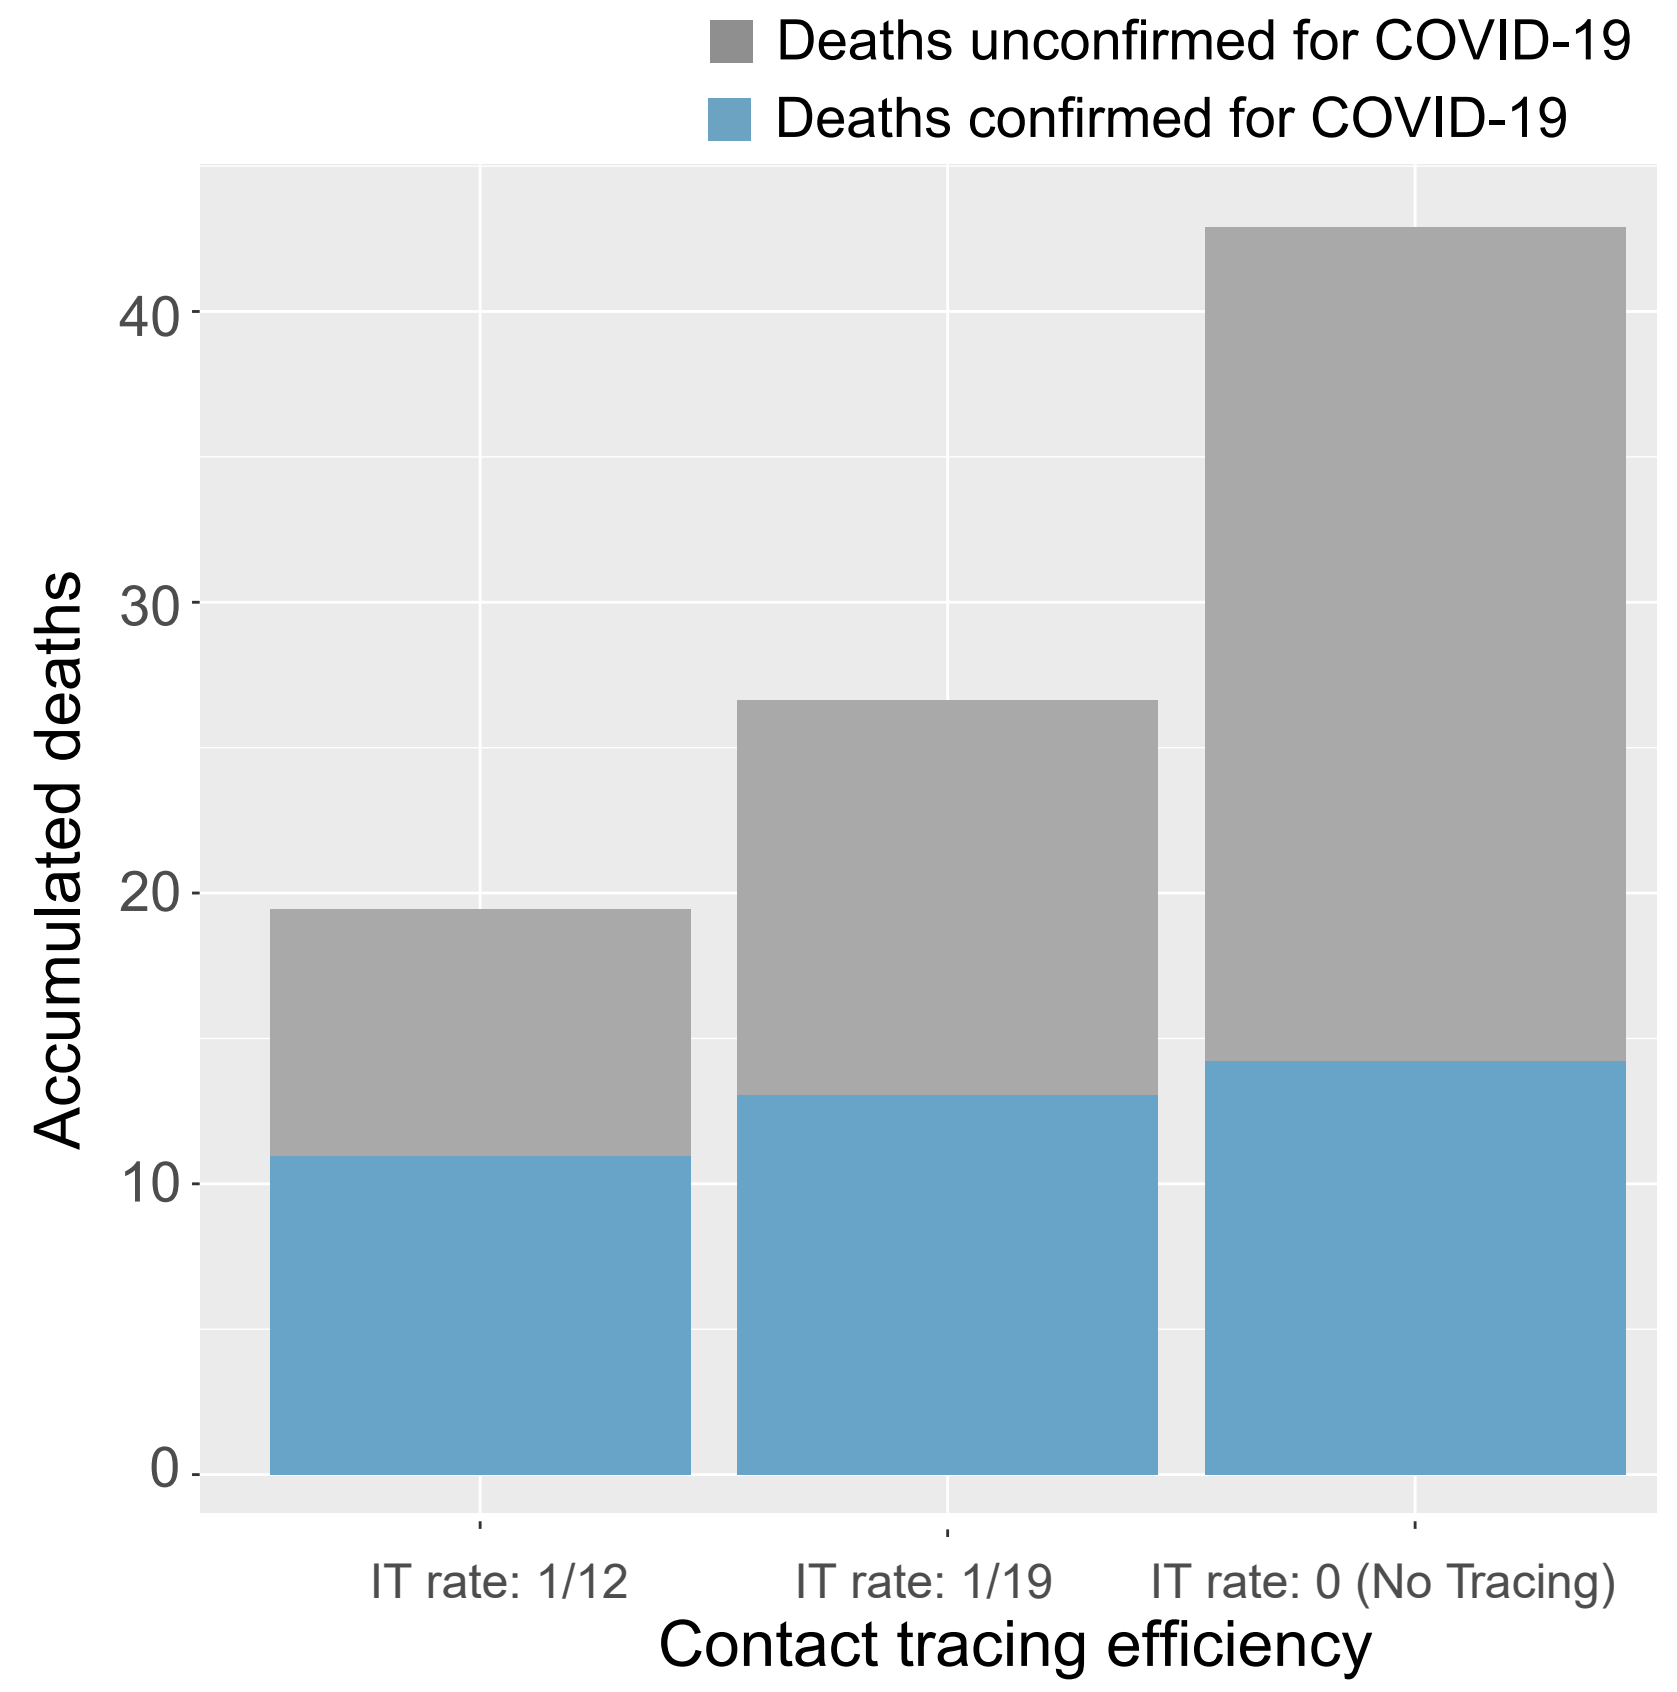

# C. Scenario 3

Experiment ■ 10-day delay ■ 20-day delay ■ 30-day delay ■ 40-day delay ■ 50-day delay

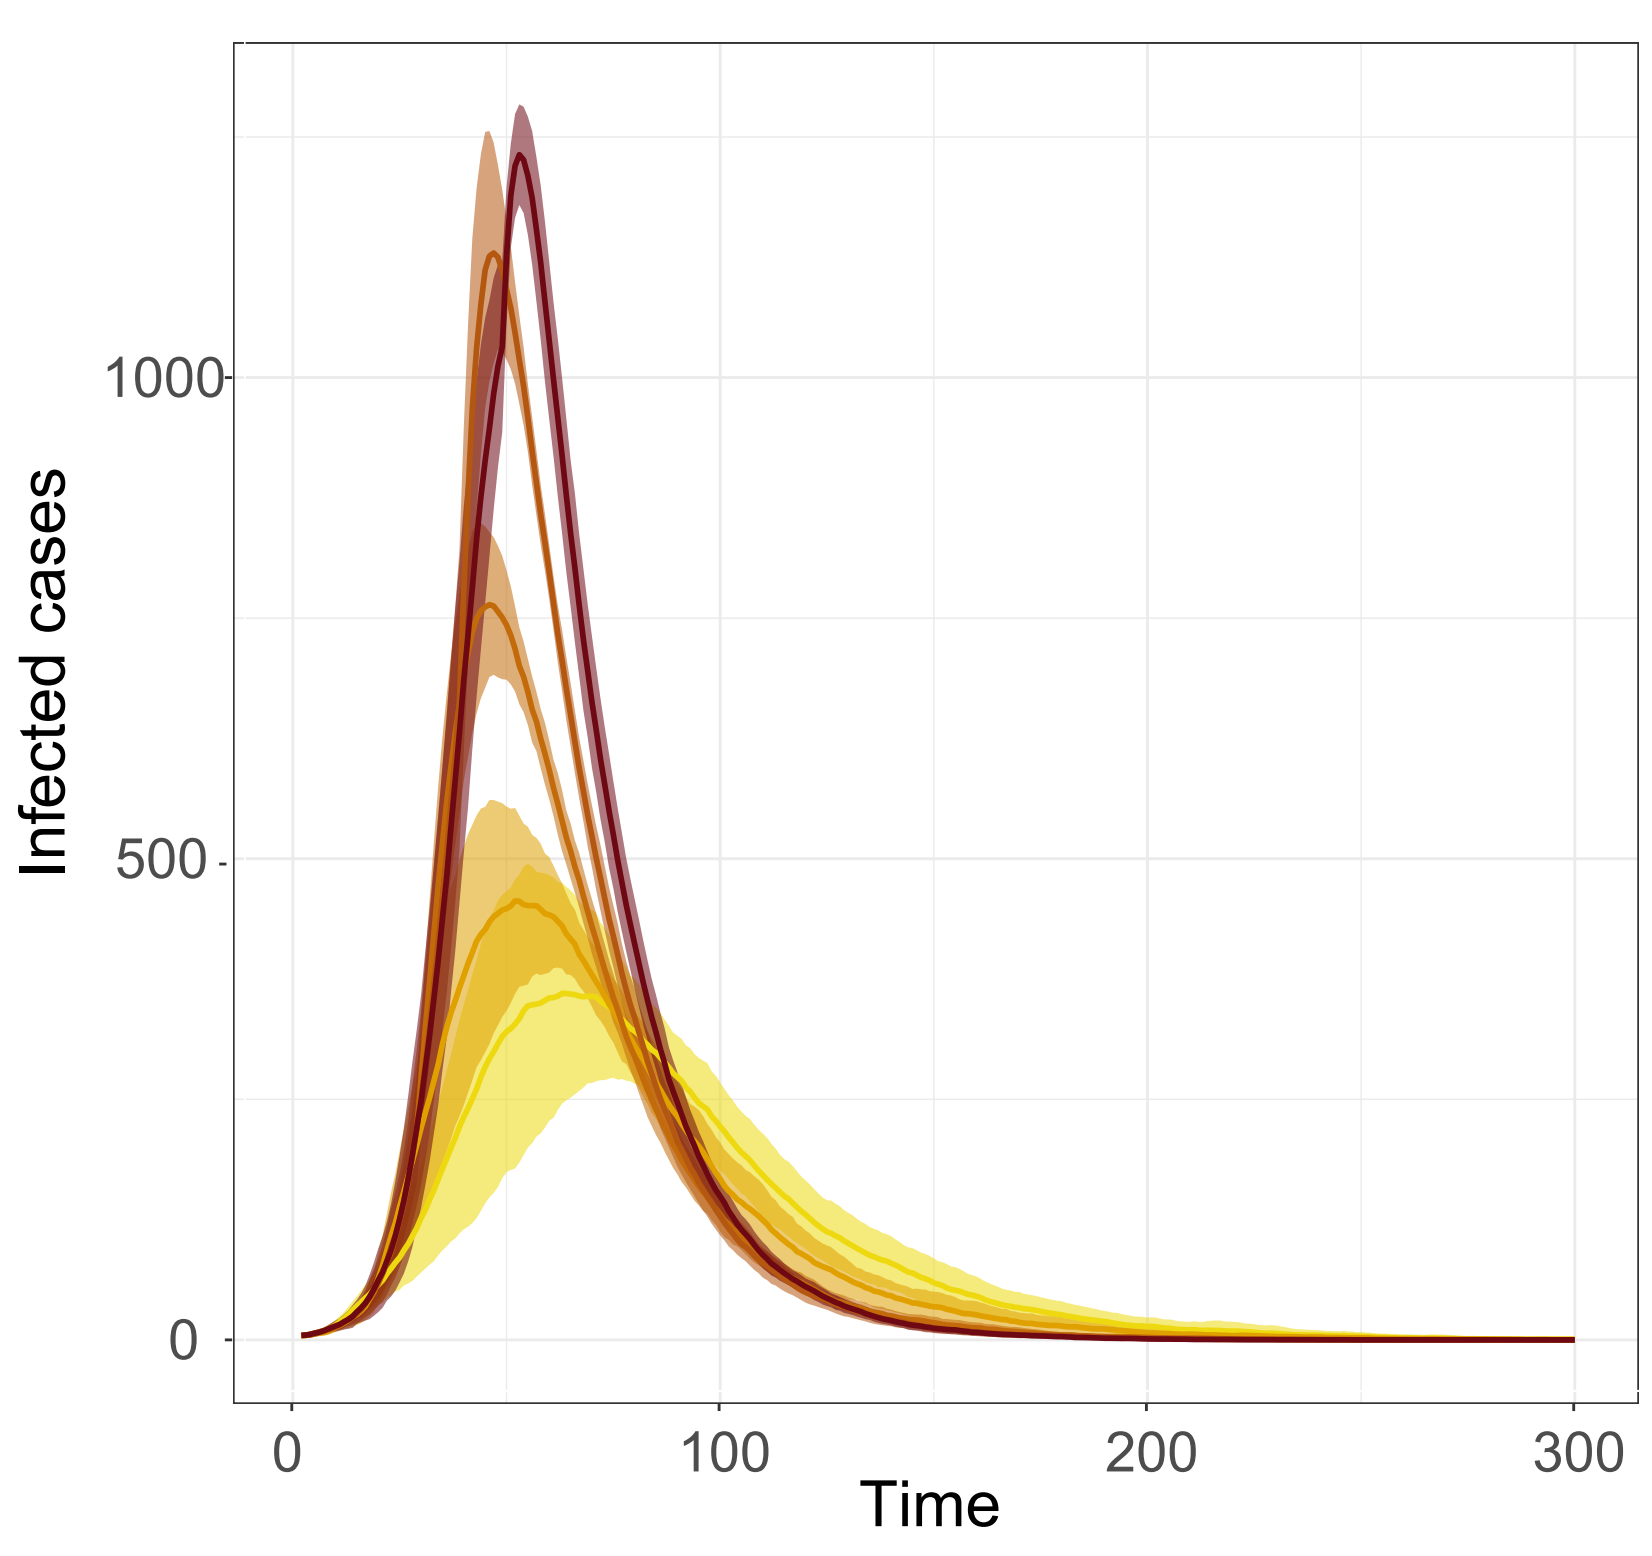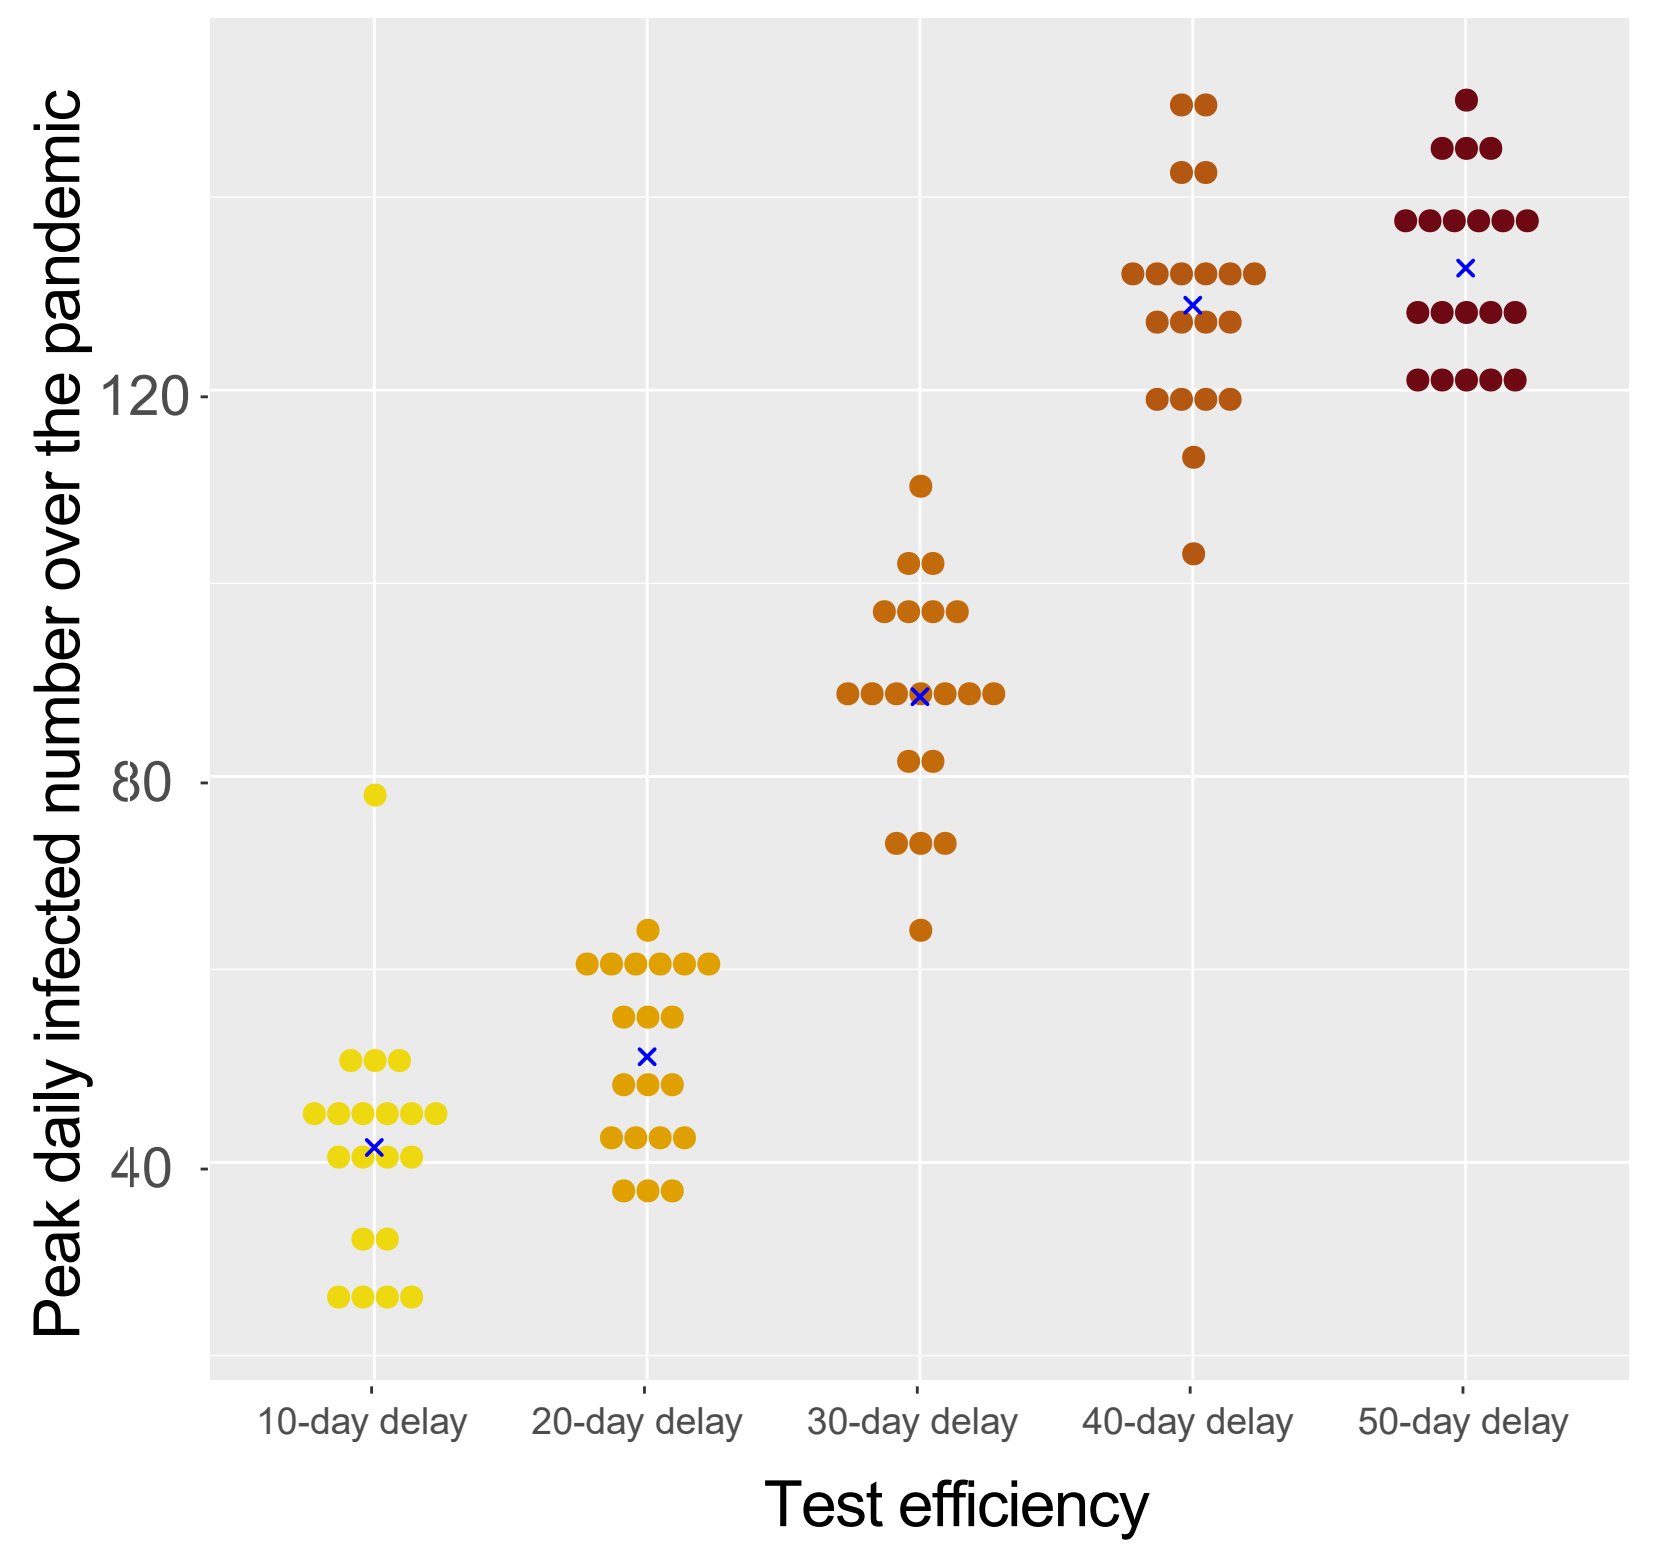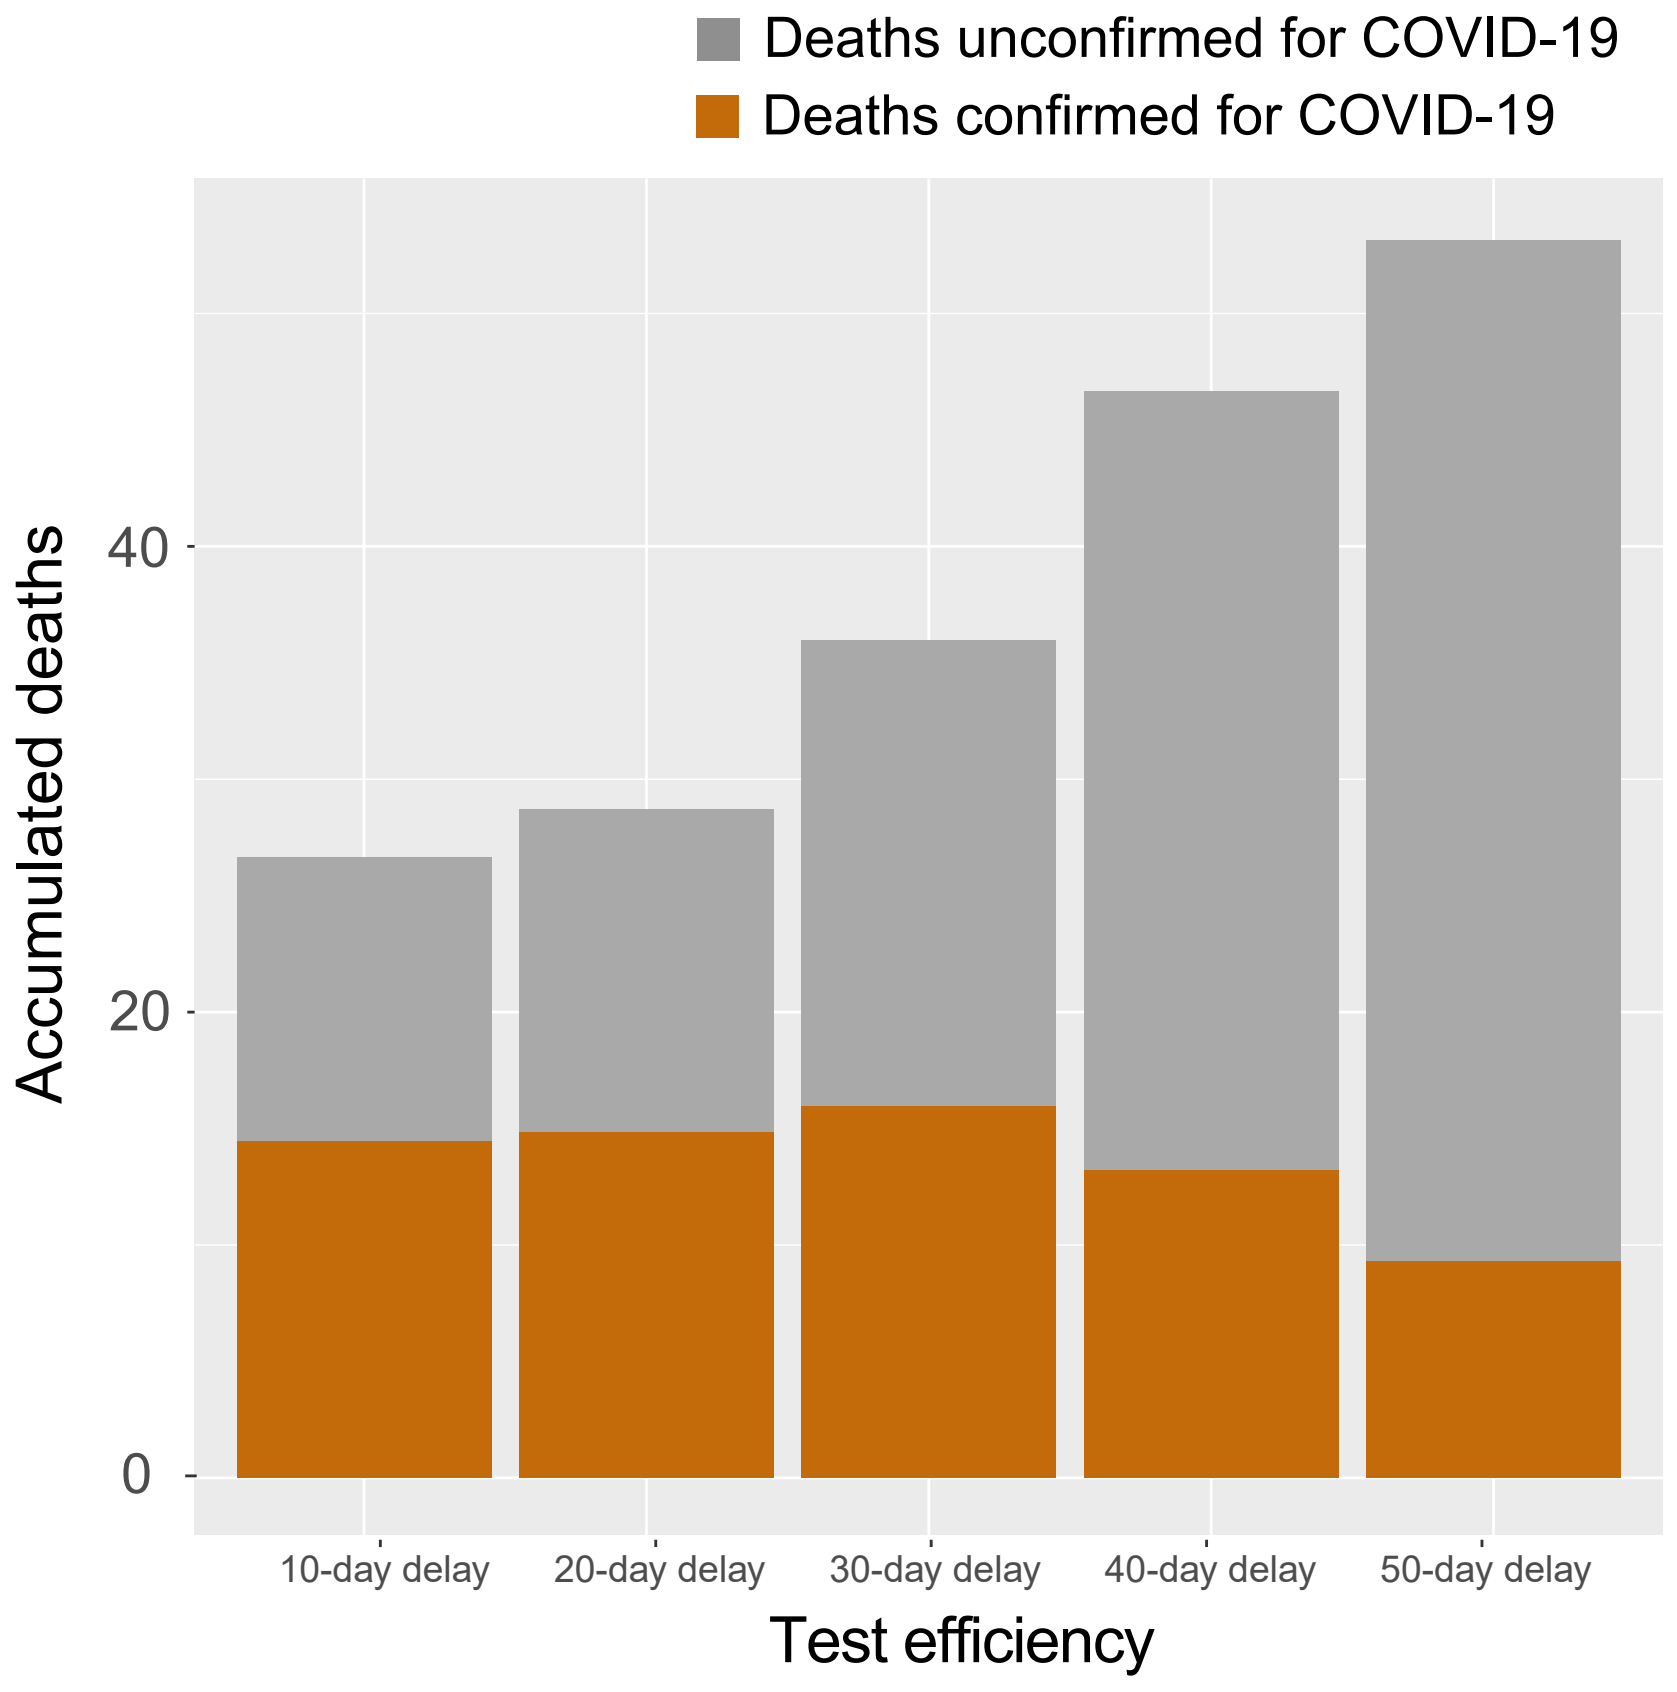

A

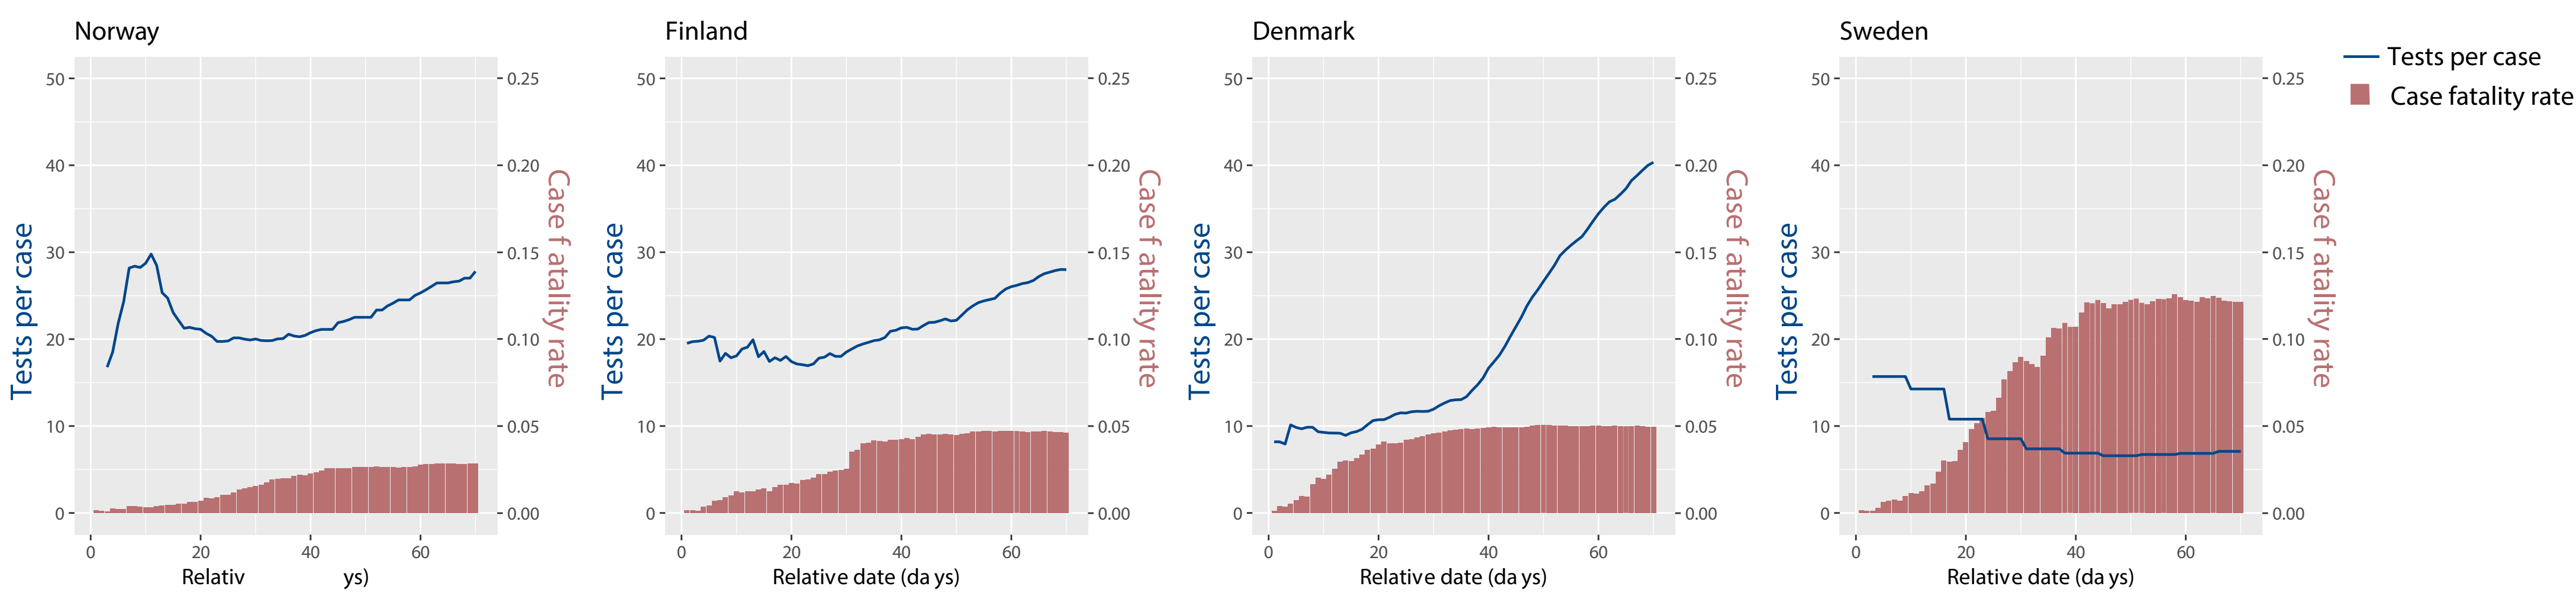

B



**A**

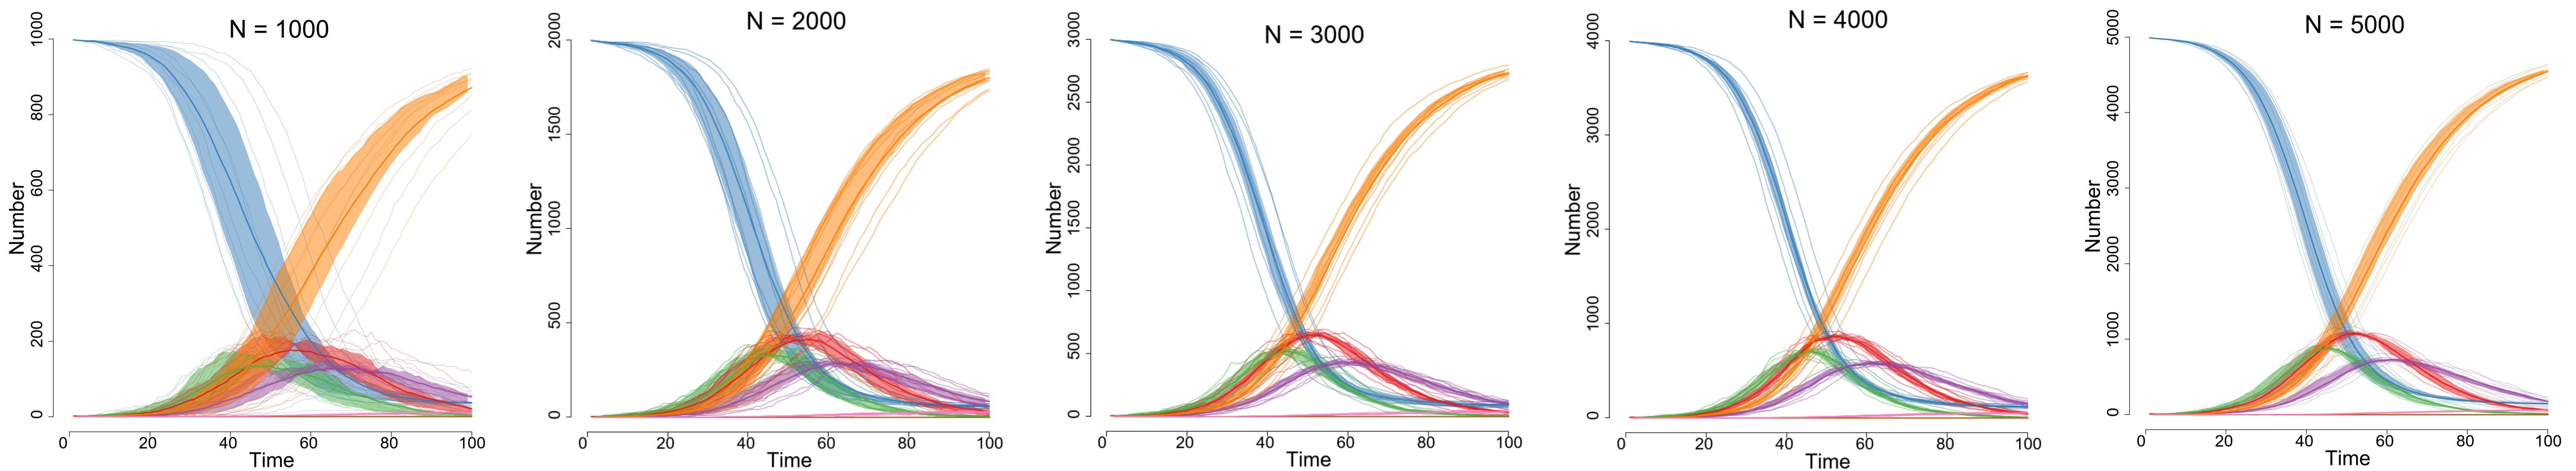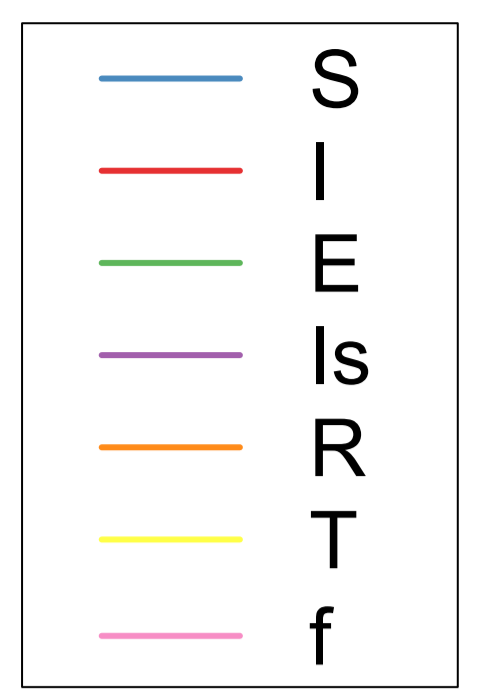

**B**

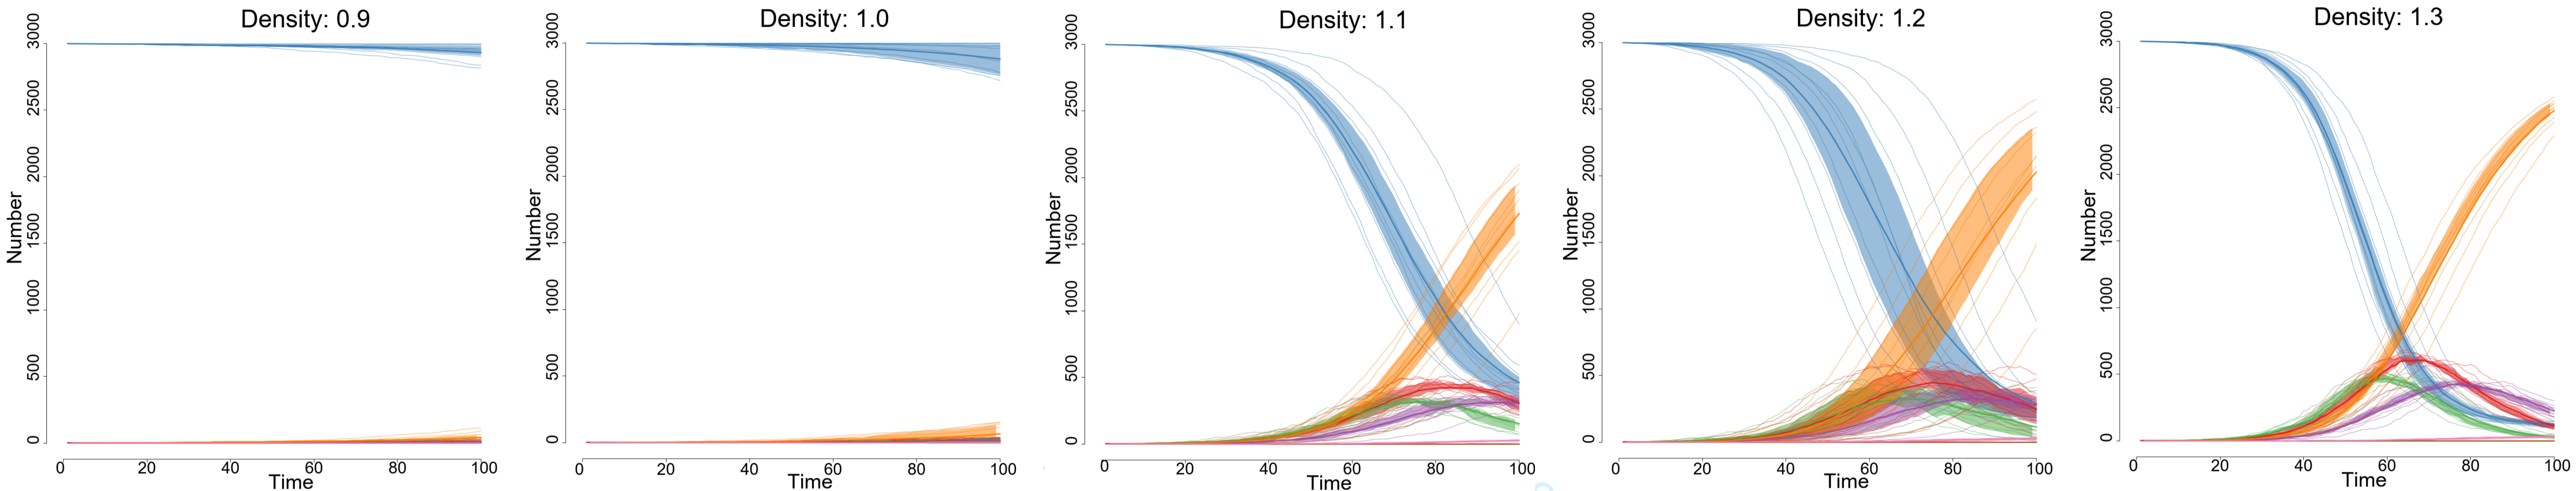

**C**

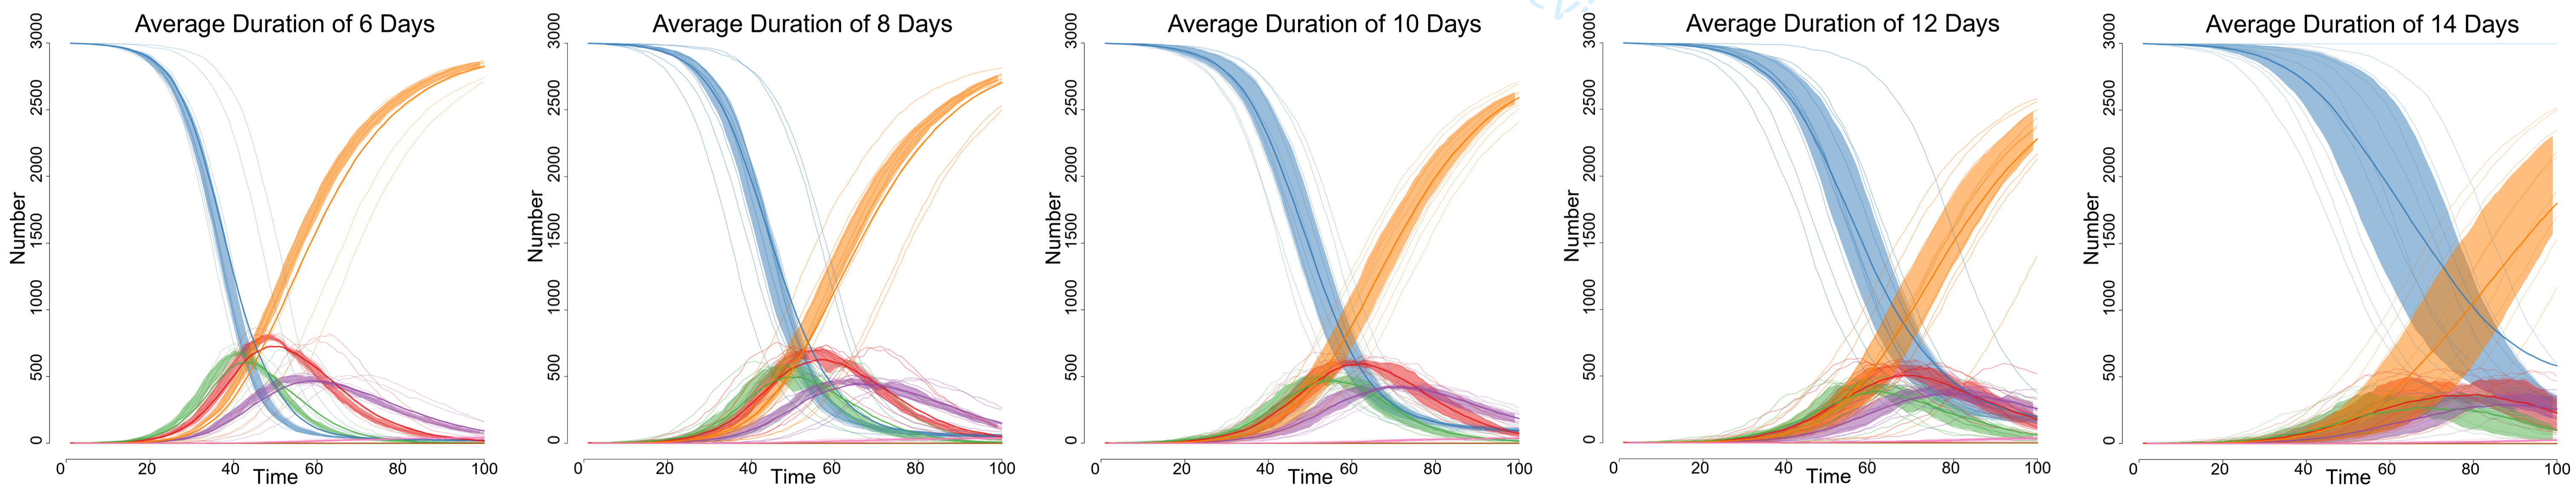

**D**

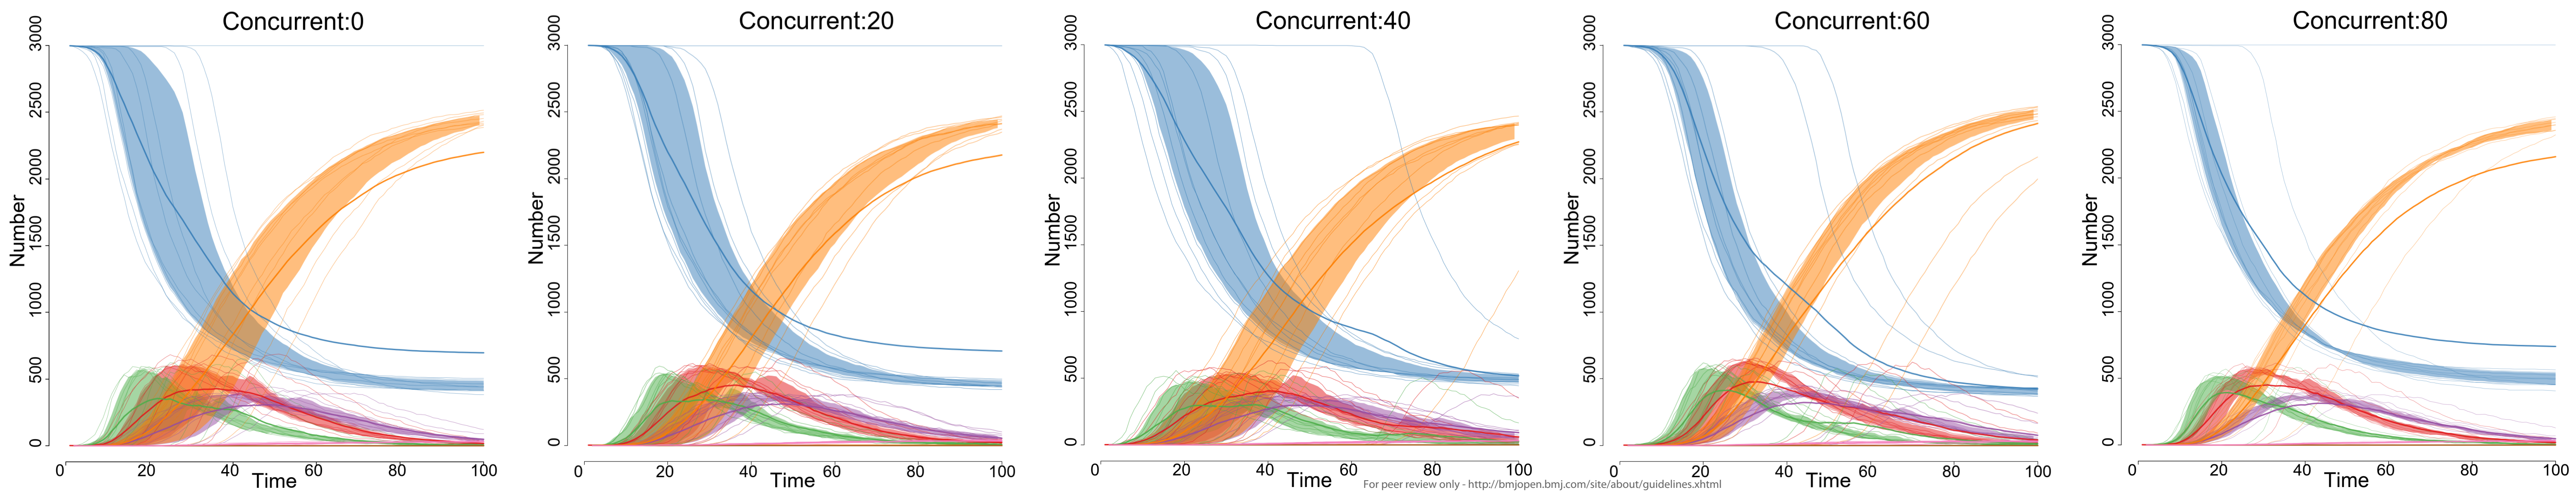

## Supplemental materials

### Model Assumptions

CoTECT assumes all tests hold the best sensitivity and specificity, which described false-positive and true-negative as a small probability event. When a small probability event happened, people exposed to the virus did not change to a tested and quarantined status in an expected period. Yet, this possibility is more than zero during the simulation. If the test sensitivity and specificity drop down, we can prolong the expected waiting time to test and self-quarantine in CoTECT. However, the test model(T) is a self-quarantine status that prevents 100% of infections from the confirmed cases, which is relied on a strong assumption. Furthermore, since the model was built based on a Bernoulli distribution, it is plausible that some infected people skipped from self-quarantine get self-recovery instead (Table S1, S2).

**Table S1. Setting of transmission rates for CoTECT**

|         | Transmission rate | Parameter definition                                                                                | Assumed rate                   | References       |
|---------|-------------------|-----------------------------------------------------------------------------------------------------|--------------------------------|------------------|
| Sampled | E-->T             | Rate per day at which exposed (E) individuals test positive and enter quarantine status (T)         | 1/18<br>(1/15-1/23)            | <sup>1 2 3</sup> |
|         | I-->T             | Rate per day at which infected (I) cases test positive and enter quarantine status (T)              | 1/12<br>(1/9-1/17)             | <sup>1 2 3</sup> |
|         | Is-->T            | Rate per day at which symptomatic infected (Is) cases test positive and enter quarantine status (T) | 1/7<br>(1/4,1/6,1/8,1/10,1/12) | <sup>1</sup>     |
| Fixed   | I-->Is            | Rate per day at which infected (I) cases become symptomatic (Is) cases                              | 1/5                            | <sup>1</sup>     |
| Fixed   | E-->I             | Rate per day at which an exposed (E) individual become infected (I) cases                           | 1/6.4                          | <sup>4</sup>     |
|         | I-->R             | Rate per day at which infected cases with mild or no symptoms (I) recover and are immunized (R)     | 1/14                           | <sup>1 2</sup>   |

|        |                                                                                              |       |                    |
|--------|----------------------------------------------------------------------------------------------|-------|--------------------|
| Is-->R | Rate per day at which infected cases with severe symptoms (Is) recover and are immunized (R) | 1/21  | <sup>1 5</sup>     |
| T-->R  | Rate per day at which quarantined, test-positive (T) cases recover and are immunized (R)     | 1/17  | Assumed            |
| Is-->F | Death rate per day of infected cases with severe symptoms (Is)                               | 0.002 | <sup>2</sup>       |
| T-->F  | Death rate per day of test-positive (T) cases                                                | 0.001 | <sup>2 3 6 7</sup> |

**Table S2. Parameter setting for CoTECT network framework**

| Parameter                                          | Definition                                                                                                                    | Value | Reference                                                                                      |
|----------------------------------------------------|-------------------------------------------------------------------------------------------------------------------------------|-------|------------------------------------------------------------------------------------------------|
| Density                                            | Density of whole social network.                                                                                              | 1.3   | Adjusted according to reported R0 (corresponding with infection probability and contact times) |
| Concurrent                                         | Number of nodes (individuals) which contact many other nodes at a given day                                                   | 0%-3% | Assumed                                                                                        |
| Isolation                                          | Number of nodes (individuals) who does not make any contact with others at a given day                                        | 0%-3% | Assumed                                                                                        |
| Infection probability for symptomatic patient (I)  | Probability of an infected individual passes the COVID-19 to another one based on an existed edge between them                | 30%   | Adjusted according to reported R0                                                              |
| Infection probability for asymptomatic patient (E) | Probability of an exposed but asymptomatic individual passes the COVID-19 to another one based on a existed edge between them | 20%   | Adjusted according to reported R0                                                              |
| Contact times between I                            | Average contact times between two                                                                                             | 3     | Adjusted according to reported R0                                                              |

|                         |                                                                                         |   |                                   |
|-------------------------|-----------------------------------------------------------------------------------------|---|-----------------------------------|
|                         | connected individuals (one is infected) in a given day                                  |   |                                   |
| Contact times between E | Average contact times between two connected individuals (one is exposed) in a given day | 3 | Adjusted according to reported R0 |

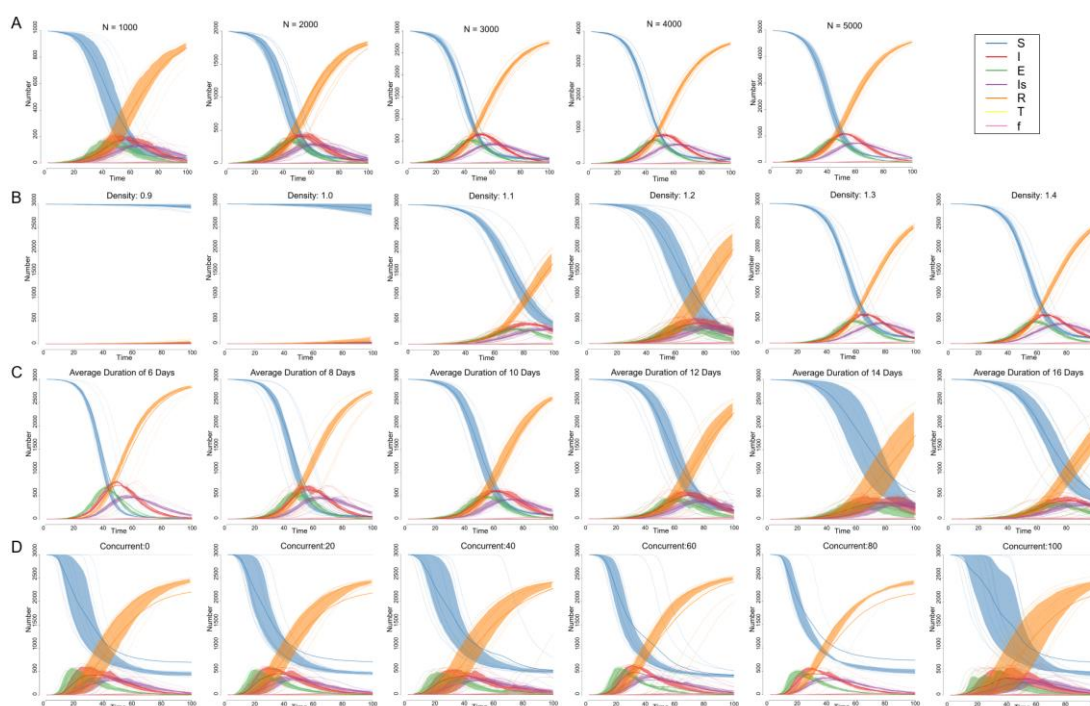

**Figure S1: Sensitivity analyses for baseline models of different (A) population sizes (N=1000, 2000, 3000, 4000, and 5000), (B) densities (0.9, 1.0, ..., 1.4), (C) average duration (6 days, 8 days, ..., 16 days), and (D) concurrent nodes (0, 20, ..., 100). Curves for each compartment in each model are shown in the graphs and demonstrate similar proportions of people in each compartment in the whole population for different population sizes.**

**Table S3: Sensitivity analyses for baseline models of different population sizes, densities, average duration, and concurrent nodes.**

| Parameters      | Values | Total infections | Peak daily infections | Proportion of total infections in whole population | Cumulative deaths of unconfirmed cases |
|-----------------|--------|------------------|-----------------------|----------------------------------------------------|----------------------------------------|
| Population size | 1000   | 883.2            | 290.9                 | 88.3%                                              | 12.1                                   |
|                 | 2000   | 1826.2           | 668.5                 | 91.3%                                              | 27.4                                   |
|                 | 3000   | 2769.8           | 1035                  | 92.3%                                              | 39.3                                   |

|                  |                            |        |        |        |        |
|------------------|----------------------------|--------|--------|--------|--------|
|                  | 4000                       | 3676   | 1378.4 | 91.9%  | 52.7   |
|                  | 5000                       | 4606.9 | 1716.8 | 92.1%  | 60.8   |
| Density          | 0.9                        | 42.5   | 2.5    | 1.42%  | 0.2    |
|                  | 1.0                        | 66.4   | 4.4    | 2.21%  | 0.8    |
|                  | 1.1                        | 1754.6 | 61     | 58.49% | 25     |
|                  | 1.2                        | 2053.8 | 61.7   | 68.46% | 26.1   |
|                  | 1.3                        | 2510.2 | 99.9   | 83.67% | 31.5   |
|                  | 1.4                        | 2747.6 | 106.8  | 91.59% | 37.5   |
|                  | Average duration<br>(Days) | 6      | 2864.4 | 130    | 95.48% |
| 8                |                            | 2741.3 | 102.4  | 91.38% | 38.3   |
| 10               |                            | 2627.7 | 93.4   | 87.59% | 38.7   |
| 12               |                            | 2310.4 | 73.8   | 77.01% | 32.8   |
| 14               |                            | 1823.8 | 52.2   | 60.79% | 24.5   |
| 16               |                            | 1755.3 | 59.4   | 58.51% | 22.1   |
| Concurrent nodes |                            | 0      | 2229.3 | 77.1   | 74.31% |
|                  | 20                         | 2210.4 | 86.7   | 73.68% | 33.8   |
|                  | 40                         | 2302.2 | 67.7   | 76.74% | 30.8   |
|                  | 60                         | 2444.8 | 93.2   | 81.49% | 31.6   |
|                  | 80                         | 2189.8 | 92.9   | 72.99% | 29.6   |
|                  | 100                        | 2167.6 | 69.5   | 72.25% | 27.5   |

### Estimation of IsT rate based on real-world data

According to the public information about the epidemic investigation, we calculated the average time from onset to reporting of the first 23 symptomatic cases in the second-wave outbreak of Covid-19 to be 2.7 days (Table S4), with case data displayed in Table S5. 2.7 days is shorter than four days we set in scenario-1, therefore, it is realistic and feasible to set the window period of the best scenario as four days. According to another cohort study in Beijing<sup>8</sup>, China, the median time interval from illness onset to laboratory confirmation is seven days (4.7–10.2), so a four day window period is rational (Table S4, S5).

**Table S4. Testing efficiency for the second-wave outbreak in Beijing, China**

| Average time from onset to reporting (first 37 cases) | Percentage of cases confirmed by contact tracing (first 37 cases) | Tests for traced contacts (first ten days) | Daily testing capacity within one month | Test efficiency for cases with fever | Test efficiency for other patients | Test efficiency for other patients | Test efficiency for normal test application | Total confirmed cases | Percentage of cases confirmed by targeted screening tests |
|-------------------------------------------------------|-------------------------------------------------------------------|--------------------------------------------|-----------------------------------------|--------------------------------------|------------------------------------|------------------------------------|---------------------------------------------|-----------------------|-----------------------------------------------------------|
| 2.7 days                                              | 68%                                                               | 2342 thousand                              | 90 to 100 thousand                      | 6h                                   | 12h                                | 6h                                 | 24h                                         | 335                   | 52%                                                       |

**Table S5. Average time from onset to reporting, and means of reporting of first 37 cases for the second-wave outbreak in Beijing, China<sup>8</sup>**

| Number of cases | Symptom         | Days from onset to reporting | Means of reporting |
|-----------------|-----------------|------------------------------|--------------------|
| 1               | fever           | 0                            | initiative         |
| 2               | fever           | 4                            | initiative         |
| 3               | fever           | 5                            | initiative         |
| 4               | fever           | 4                            | initiative         |
| 5               | fever           | 1                            | initiative         |
| 6               | fever           | 5                            | initiative         |
| 7               | fever           | 2                            | initiative         |
| 8               | no              | NA                           | tracing            |
| 9               | no              | NA                           | tracing            |
| 10              | muscle soreness | 3                            | tracing            |
| 11              | sore throat     | 2                            | tracing            |
| 12              | fever           | 0                            | initiative         |
| 13              | headache        | 8                            | tracing            |
| 14              | no              | NA                           | tracing            |
| 15              | no              | NA                           | tracing            |
| 16              | sore throat     | 1                            | tracing            |
| 17              | fever           | 4                            | tracing            |
| 18              | fever           | 0                            | initiative         |
| 19              | cough           | 1                            | tracing            |
| 20              | sneeze          | 2                            | tracing            |
| 21              | fever           | 2                            | tracing            |
| 22              | sneeze          | 8                            | tracing            |
| 23              | headache        | 1                            | tracing            |
| 24              | no              | NA                           | tracing            |
| 25              | fever           | 1                            | initiative         |
| 26              | fever           | 4                            | initiative         |
| 27              | fever           | 2                            | tracing            |
| 28              | no              | NA                           | tracing            |



|                |            |            |            |
|----------------|------------|------------|------------|
| 29             | dry throat | 2          | tracing    |
| 30             | no         | NA         | tracing    |
| 31             | no         | NA         | tracing    |
| 32             | no         | NA         | tracing    |
| 33             | no         | NA         | tracing    |
| 34             | no         | NA         | tracing    |
| 35             | no         | NA         | tracing    |
| 36             | no         | NA         | tracing    |
| 37             | no         | NA         | initiative |
| <b>Average</b> |            | <b>2.7</b> |            |

## References

1. Organization WH. Report of the WHO-China Joint Mission on Conronavirus Disease 2019(COVID-19), 2020.
2. Wang D, Hu B, Hu C, et al. Clinical Characteristics of 138 Hospitalized Patients With 2019 Novel Coronavirus–Infected Pneumonia in Wuhan, China. *JAMA* 2020;323(11):1061-69. doi: 10.1001/jama.2020.1585
3. Huang C, Wang Y, Li X, et al. Clinical features of patients infected with 2019 novel coronavirus in Wuhan, China. *The Lancet* 2020;395(10223):497-506. doi: 10.1016/S0140-6736(20)30183-5
4. Backer JA, Klinkenberg D, Wallinga J. Incubation period of 2019 novel coronavirus (2019-nCoV) infections among travellers from Wuhan, China, 20-28 January 2020. LID - 10.2807/1560-7917.ES.2020.25.5.2000062 [doi] LID - 2000062. (1560-7917 (Electronic))
5. Liu Y, Yan L-M, Wan L, et al. Viral dynamics in mild and severe cases of COVID-19. *The Lancet Infectious Diseases* 2020;20(6):656-57. doi: 10.1016/S1473-3099(20)30232-2
6. Li Q, Guan X, Wu P, et al. Early Transmission Dynamics in Wuhan, China, of Novel Coronavirus-Infected Pneumonia. (1533-4406 (Electronic))
7. Russell TW, Hellewell J, Jarvis CI, et al. Estimating the infection and case fatality ratio for coronavirus disease (COVID-19) using age-adjusted data from the outbreak on the Diamond Princess cruise ship, February 2020. LID - 10.2807/1560-7917.ES.2020.25.12.2000256 [doi] LID - 2000256. (1560-7917 (Electronic))
8. China NHCotPsRo. Official Site of National Health Commission of the People's Republic of China 2020 [Available from: [WWW.nhc.gov.cn](http://WWW.nhc.gov.cn) accessed June 2020.

## Strengthening the Reporting of Empirical Simulation Studies (STRESS) Agent based simulation guidelines STRESS-ABS

| Section/Subsection          | Item | Recommendation                                                                                                                                                                                                                                                                                                                                                                                                                                                                                                                                                                                                                                                                                                                                                                                                                                                    | Reported in the main document   |
|-----------------------------|------|-------------------------------------------------------------------------------------------------------------------------------------------------------------------------------------------------------------------------------------------------------------------------------------------------------------------------------------------------------------------------------------------------------------------------------------------------------------------------------------------------------------------------------------------------------------------------------------------------------------------------------------------------------------------------------------------------------------------------------------------------------------------------------------------------------------------------------------------------------------------|---------------------------------|
| <b>1. Objectives</b>        |      |                                                                                                                                                                                                                                                                                                                                                                                                                                                                                                                                                                                                                                                                                                                                                                                                                                                                   |                                 |
| Purpose of the model        | 1.1  | Explain the background and rationale for the model.                                                                                                                                                                                                                                                                                                                                                                                                                                                                                                                                                                                                                                                                                                                                                                                                               | Abstract, introduction, methods |
| Model Outputs               | 1.2  | State the qualitative or quantitative system level outputs that emerge from agent interactions within the ABS.<br><br>Define all quantitative performance measures that are reported, using equations where necessary. Specify how and when they are calculated during the model run along with how any measures of error such as confidence intervals are calculated                                                                                                                                                                                                                                                                                                                                                                                                                                                                                             | Methods                         |
| Experimentation Aims        | 1.3  | If the model has been used for experimentation, state the research questions that it was used to answer.<br><br>a.) Theory driven analysis. – Provide details and reference the theories that are tested within the model.<br><br>b.) Scenario based analysis – Provide a name and description for each scenario, including a rationale for the choice of scenarios and ensure that item 2.3 (below) is completed.<br><br>c.) Design of experiments – Provide details of the overall design of the experiments with reference to performance measures and their parameters (provide further details in <i>data</i> below).<br><br>d.) Simulation Optimisation – (if appropriate) Provide full details of what is to be optimised, the parameters that were included and the algorithm(s) that was be used. Where possible provide a citation of the algorithm(s). | Methods                         |
| <b>2. Logic</b>             |      |                                                                                                                                                                                                                                                                                                                                                                                                                                                                                                                                                                                                                                                                                                                                                                                                                                                                   |                                 |
| Base model overview diagram | 2.1  | Provide one or more of: state chart, process flow or equivalent diagrams to describe the basic logic of the base model to readers. Avoid complicated diagrams in the main text.                                                                                                                                                                                                                                                                                                                                                                                                                                                                                                                                                                                                                                                                                   | Methods, results                |
| Base model logic            | 2.2  | Give details of the base model logic. This could be text to explain the overview diagram along with extra details including ABS product and process patterns. Include details of all intermediate calculations.                                                                                                                                                                                                                                                                                                                                                                                                                                                                                                                                                                                                                                                   | Methods, results                |
| Scenario logic              | 2.3  | Give details of any difference in the model logic between the base case model and scenarios. This                                                                                                                                                                                                                                                                                                                                                                                                                                                                                                                                                                                                                                                                                                                                                                 | Introduction, methods, results  |

|            |     |                                                                                                                                                                                                                                                                                                                                                                                                                                  |                                                                                                                                                                                                                                                                                                                                                                                                                                                                                                                                                                                                                                                                                                                                       |         |
|------------|-----|----------------------------------------------------------------------------------------------------------------------------------------------------------------------------------------------------------------------------------------------------------------------------------------------------------------------------------------------------------------------------------------------------------------------------------|---------------------------------------------------------------------------------------------------------------------------------------------------------------------------------------------------------------------------------------------------------------------------------------------------------------------------------------------------------------------------------------------------------------------------------------------------------------------------------------------------------------------------------------------------------------------------------------------------------------------------------------------------------------------------------------------------------------------------------------|---------|
|            |     | could be incorporated as text or, where differences are substantial, could be incorporated in the same manner as 2.1.                                                                                                                                                                                                                                                                                                            |                                                                                                                                                                                                                                                                                                                                                                                                                                                                                                                                                                                                                                                                                                                                       |         |
| Algorithms | 2.4 | Provide further detail on any algorithms in the model that (for example) mimic complex or manual processes in the real world (i.e. scheduling of arrivals/appointments/operations/maintenance, operation of a conveyor system, machine breakdowns, etc.). Sufficient detail should be included (or referred to in other published work) for the algorithms to be reproducible. Pseudo-code may be used to describe an algorithm. | Introduction, methods, results                                                                                                                                                                                                                                                                                                                                                                                                                                                                                                                                                                                                                                                                                                        |         |
| Components | 2.5 | 2.5.1. Environment                                                                                                                                                                                                                                                                                                                                                                                                               | Describe the environment agents interact within, indicating its structure, and how it is generated. For example, are agents bound within a homogeneous grid, or do they have continuous movement through a detailed landscape incorporating geographic or environmental information?                                                                                                                                                                                                                                                                                                                                                                                                                                                  | Methods |
|            |     | 2.5.2. Agents                                                                                                                                                                                                                                                                                                                                                                                                                    | <p>List all agents and agent groups within the simulation. Include a description of their role in the model, their possible states, state transitions, and all their attributes.</p> <p>Describe all decision-making rules that agents follow in either algorithmic or equation form. Where relevant authors should report:</p> <ul style="list-style-type: none"> <li>• The data that agents access (i.e. internal attributes or external information from the environment) and how it is used.</li> <li>• The objectives agents seek to achieve.</li> <li>• The algorithms, optimisations, heuristics and rules that agents use to achieve objectives.</li> <li>• How agents work together within a group along with any</li> </ul> | Methods |

rules for changes in group membership.

- Predictions of future events and adaptive action.

|                             |                                                                                                                                                                                                                                                                                                                                                                   |         |
|-----------------------------|-------------------------------------------------------------------------------------------------------------------------------------------------------------------------------------------------------------------------------------------------------------------------------------------------------------------------------------------------------------------|---------|
| 2.5.3. Interaction Topology | <p>Describe how agents and agent groupings are connected with each other in the model define:</p> <ul style="list-style-type: none"> <li>• with whom agents can interact,</li> <li>• how recipients of interactions are selected</li> <li>• what frequency interaction occurs.</li> <li>• How agents handle and assign priorities to concurrent events</li> </ul> | Methods |
|-----------------------------|-------------------------------------------------------------------------------------------------------------------------------------------------------------------------------------------------------------------------------------------------------------------------------------------------------------------------------------------------------------------|---------|

It is recommended that interactions are described using a combination of equations pseudo-code and logic diagrams.

Report how interactions are affected by agent states and the environment state

|                    |                                                                                  |         |
|--------------------|----------------------------------------------------------------------------------|---------|
| 2.5.4 Entry / Exit | <p>Where relevant, define how agents are created and destroyed in the model.</p> | Methods |
|--------------------|----------------------------------------------------------------------------------|---------|

### 3. Data

|              |     |                                                                                                                                                                                                                                                                                                                                                                                                                                                                                |         |
|--------------|-----|--------------------------------------------------------------------------------------------------------------------------------------------------------------------------------------------------------------------------------------------------------------------------------------------------------------------------------------------------------------------------------------------------------------------------------------------------------------------------------|---------|
| Data sources | 3.1 | <p>List and detail all data sources. Sources may include:</p> <ul style="list-style-type: none"> <li>• Interviews with stakeholders</li> <li>• samples of routinely collected data,</li> <li>• prospectively collected samples for the purpose of the simulation study,</li> <li>• public domain data published in either academic or organisational literature.</li> </ul> <p>Provide, where possible, the link and DOI to the data or reference to published literature.</p> | Methods |
|--------------|-----|--------------------------------------------------------------------------------------------------------------------------------------------------------------------------------------------------------------------------------------------------------------------------------------------------------------------------------------------------------------------------------------------------------------------------------------------------------------------------------|---------|

All data source descriptions should include details of the sample size, date ranges and use within the study.

|                           |     |                                                                                                                                                                                                                                                                                                                                                                                                                                                                                                                                                                                                                                                                                                                                                                                                   |                  |
|---------------------------|-----|---------------------------------------------------------------------------------------------------------------------------------------------------------------------------------------------------------------------------------------------------------------------------------------------------------------------------------------------------------------------------------------------------------------------------------------------------------------------------------------------------------------------------------------------------------------------------------------------------------------------------------------------------------------------------------------------------------------------------------------------------------------------------------------------------|------------------|
| Pre-processing            | 3.2 | Provide details of any data manipulation or filtering that has taken place before its use in the simulation, e.g. interpolation to account for missing data, removal of outliers or filtering of large scale data.                                                                                                                                                                                                                                                                                                                                                                                                                                                                                                                                                                                | Methods          |
| Input parameters          | 3.3 | <p>List all input parameters in the model, providing a description of each parameter and the values used. For stochastic inputs provide details of any continuous, discrete or empirical distributions used along with all associated parameters. Where applicable define the time/spatial dependence of parameters and any correlation structure.</p> <p>Clearly state:</p> <ul style="list-style-type: none"> <li>• Base case inputs</li> <li>• Inputs used in experimentation, where different from the base case.</li> <li>• Where optimisation or design of experiments has been used, state the range of values that parameters can take.</li> </ul> <p>Where theoretical distributions are used, state how, , these were selected and prioritised above other candidate distributions.</p> | Methods, results |
| Assumptions               | 3.4 | Where data or knowledge of the real system is unavailable, state and justify the assumptions used to set input parameter values and distributions; agent interactions or behaviour; or model logic.                                                                                                                                                                                                                                                                                                                                                                                                                                                                                                                                                                                               | Methods          |
| <b>4. Experimentation</b> |     |                                                                                                                                                                                                                                                                                                                                                                                                                                                                                                                                                                                                                                                                                                                                                                                                   |                  |
| Initialisation            | 4.1 | <p>State if a warm-up period has been used, its length and the analysis method used to select it.</p> <p>State what if any initial agent and environmental conditions have been included. For example, the initial agent population size, agent states and attributes, initial agent network structure(s), and resources within the environment. Report whether initialisation of these variables is deterministic or stochastic.</p>                                                                                                                                                                                                                                                                                                                                                             | Methods, results |
| Run length                | 4.2 | Detail the run length of the simulation model and time units.                                                                                                                                                                                                                                                                                                                                                                                                                                                                                                                                                                                                                                                                                                                                     | Methods          |
| Estimation approach       | 4.3 | State if the model is deterministic or stochastic. If the model is stochastic, state the number of replications that have been used. If an alternative estimation method has been used (e.g. batch means), provide full details.                                                                                                                                                                                                                                                                                                                                                                                                                                                                                                                                                                  | Methods          |
| <b>5. Implementation</b>  |     |                                                                                                                                                                                                                                                                                                                                                                                                                                                                                                                                                                                                                                                                                                                                                                                                   |                  |

|                                                                                              |                                  |     |                                                                                                                                                                                                                                                                                                                                                                                                                                                                                                                                                                                                                       |              |
|----------------------------------------------------------------------------------------------|----------------------------------|-----|-----------------------------------------------------------------------------------------------------------------------------------------------------------------------------------------------------------------------------------------------------------------------------------------------------------------------------------------------------------------------------------------------------------------------------------------------------------------------------------------------------------------------------------------------------------------------------------------------------------------------|--------------|
| 1<br>2<br>3<br>4<br>5<br>6<br>7<br>8<br>9<br>10<br>11<br>12<br>13<br>14<br>15                | Software or programming language | 5.1 | State the operating system and version and build number.<br><br>State the name, version and build number of commercial or open source ABS software that the model is implemented in.<br><br>State the name and version of general-purpose programming languages used (e.g. Python 3.5.2). Where packages, frameworks and libraries have been used provide all detailed including version numbers.                                                                                                                                                                                                                     | Methods      |
| 16<br>17<br>18<br>19<br>20<br>21                                                             | Random sampling                  | 5.2 | State the algorithm or package used to generate random samples within the software/programming language used e.g. Mersenne Twister or Java.Random version x.y                                                                                                                                                                                                                                                                                                                                                                                                                                                         | Methods      |
| 22<br>23<br>24<br>25<br>26<br>27<br>28<br>29<br>30<br>31<br>32<br>33<br>34<br>35             | Model execution                  | 5.3 | If the ABS model has a time component, describe how time is modelled (e.g. fixed time steps or discrete-event). State the order of variable updating within the model. In time-stepped execution state how concurrent events are resolved.<br><br>If the model is parallel, distributed and/or use grid or cloud computing, etc., state and preferably reference the technology used. For parallel and distributed simulations the time management algorithms used. If the HLA is used then state the version of the standard, which run-time infrastructure (and version), and any supporting documents (FOMs, etc.) | Methods      |
| 36<br>37<br>38<br>39<br>40<br>41<br>42<br>43                                                 | System Specification             | 5.4 | State the model run time and specification of hardware used. This is particularly important for large scale models that require substantial computing power. For parallel, distributed and/or use grid or cloud computing, etc. state the details of all systems used in the implementation (processors, network, etc.)                                                                                                                                                                                                                                                                                               | Methods      |
| 44                                                                                           | <b>6. Code Access</b>            |     |                                                                                                                                                                                                                                                                                                                                                                                                                                                                                                                                                                                                                       |              |
| 45<br>46<br>47<br>48<br>49<br>50<br>51<br>52<br>53<br>54<br>55<br>56<br>57<br>58<br>59<br>60 | Computer Model Sharing Statement | 6.1 | Describe how someone could obtain the model described in the paper, the simulation software and any other associated software (or hardware) needed to reproduce the results. Provide, where possible, the link and DOIs to these.                                                                                                                                                                                                                                                                                                                                                                                     | Data sharing |
