# Supplementary material for: Role of efficient testing and contact tracing in mitigating the COVID-19 pandemic: a network modelling study
Source: PubMed Central journal article supplement — BMJ Open. 2021 Jul 7;11(7):e045886. doi: 10.1136/bmjopen-2020-045886 (PMC8266432; doi:10.1136/bmjopen-2020-045886), 2021-07-07
Supplement: bmjopen-2020-045886supp002.pdf [file bmjopen-2020-045886supp002.pdf]

## Supplemental materials

### Model Assumptions

CoTECT assumes all tests hold the best sensitivity and specificity, which described false-positive and true-negative as a small probability event. When a small probability event happened, people exposed to the virus did not change to a tested and quarantined status in an expected period. Yet, this possibility is more than zero during the simulation. If the test sensitivity and specificity drop down, we can prolong the expected waiting time to test and self-quarantine in CoTECT. However, the test model(T) is a self-quarantine status that prevents 100% of infections from the confirmed cases, which is relied on a strong assumption. Furthermore, since the model was built based on a Bernoulli distribution, it is plausible that some infected people skipped from self-quarantine get self-recovery instead (Table S1, S2).

**Table S1. Setting of transmission rates for CoTECT**

|         | Transmission rate | Parameter definition                                                                                | Assumed rate                   | References       |
|---------|-------------------|-----------------------------------------------------------------------------------------------------|--------------------------------|------------------|
| Sampled | E-->T             | Rate per day at which exposed (E) individuals test positive and enter quarantine status (T)         | 1/18<br>(1/15-1/23)            | <sup>1 2 3</sup> |
|         | I-->T             | Rate per day at which infected (I) cases test positive and enter quarantine status (T)              | 1/12<br>(1/9-1/17)             | <sup>1 2 3</sup> |
|         | Is-->T            | Rate per day at which symptomatic infected (Is) cases test positive and enter quarantine status (T) | 1/7<br>(1/4,1/6,1/8,1/10,1/12) | <sup>1</sup>     |
| Fixed   | I-->Is            | Rate per day at which infected (I) cases become symptomatic (Is) cases                              | 1/5                            | <sup>1</sup>     |
| Fixed   | E-->I             | Rate per day at which an exposed (E) individual become infected (I) cases                           | 1/6.4                          | <sup>4</sup>     |
|         | I-->R             | Rate per day at which infected cases with mild or no symptoms (I) recover and are immunized (R)     | 1/14                           | <sup>1 2</sup>   |

|  |        |                                                                                              |       |                    |
|--|--------|----------------------------------------------------------------------------------------------|-------|--------------------|
|  | Is-->R | Rate per day at which infected cases with severe symptoms (Is) recover and are immunized (R) | 1/21  | <sup>1 5</sup>     |
|  | T-->R  | Rate per day at which quarantined, test-positive (T) cases recover and are immunized (R)     | 1/17  | Assumed            |
|  | Is-->F | Death rate per day of infected cases with severe symptoms (Is)                               | 0.002 | <sup>2</sup>       |
|  | T-->F  | Death rate per day of test-positive (T) cases                                                | 0.001 | <sup>2 3 6 7</sup> |

**Table S2. Parameter setting for CoTECT network framework**

| Parameter                                          | Definition                                                                                                                    | Value | Reference                                                                                      |
|----------------------------------------------------|-------------------------------------------------------------------------------------------------------------------------------|-------|------------------------------------------------------------------------------------------------|
| Density                                            | Density of whole social network.                                                                                              | 1.3   | Adjusted according to reported R0 (corresponding with infection probability and contact times) |
| Concurrent                                         | Number of nodes (individuals) which contact many other nodes at a given day                                                   | 0%-3% | Assumed                                                                                        |
| Isolation                                          | Number of nodes (individuals) who does not make any contact with others at a given day                                        | 0%-3% | Assumed                                                                                        |
| Infection probability for symptomatic patient (I)  | Probability of an infected individual passes the COVID-19 to another one based on an existed edge between them                | 30%   | Adjusted according to reported R0                                                              |
| Infection probability for asymptomatic patient (E) | Probability of an exposed but asymptomatic individual passes the COVID-19 to another one based on a existed edge between them | 20%   | Adjusted according to reported R0                                                              |
| Contact times between I                            | Average contact times between two                                                                                             | 3     | Adjusted according to reported R0                                                              |

|                         |                                                                                         |   |                                   |
|-------------------------|-----------------------------------------------------------------------------------------|---|-----------------------------------|
|                         | connected individuals (one is infected) in a given day                                  |   |                                   |
| Contact times between E | Average contact times between two connected individuals (one is exposed) in a given day | 3 | Adjusted according to reported R0 |

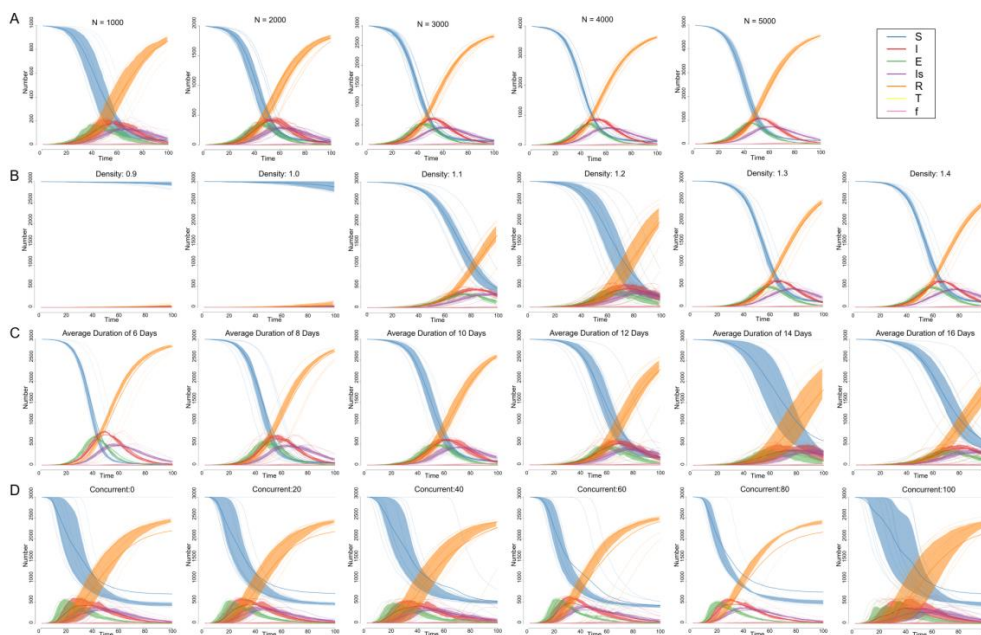

**Figure S1: Sensitivity analyses for baseline models of different (A) population sizes (N=1000, 2000, 3000, 4000, and 5000), (B) densities (0.9, 1.0, ..., 1.4), (C) average duration (6 days, 8 days, ..., 16 days), and (D) concurrent nodes (0, 20, ..., 100). Curves for each compartment in each model are shown in the graphs and demonstrate similar proportions of people in each compartment in the whole population for different population sizes.**

**Table S3: Sensitivity analyses for baseline models of different population sizes, densities, average duration, and concurrent nodes.**

| Parameters      | Values | Total infections | Peak daily infections | Proportion of total infections in whole population | Cumulative deaths of unconfirmed cases |
|-----------------|--------|------------------|-----------------------|----------------------------------------------------|----------------------------------------|
| Population size | 1000   | 883.2            | 290.9                 | 88.3%                                              | 12.1                                   |
|                 | 2000   | 1826.2           | 668.5                 | 91.3%                                              | 27.4                                   |
|                 | 3000   | 2769.8           | 1035                  | 92.3%                                              | 39.3                                   |

|                            |      |        |        |        |      |
|----------------------------|------|--------|--------|--------|------|
|                            | 4000 | 3676   | 1378.4 | 91.9%  | 52.7 |
|                            | 5000 | 4606.9 | 1716.8 | 92.1%  | 60.8 |
| Density                    | 0.9  | 42.5   | 2.5    | 1.42%  | 0.2  |
|                            | 1.0  | 66.4   | 4.4    | 2.21%  | 0.8  |
|                            | 1.1  | 1754.6 | 61     | 58.49% | 25   |
|                            | 1.2  | 2053.8 | 61.7   | 68.46% | 26.1 |
|                            | 1.3  | 2510.2 | 99.9   | 83.67% | 31.5 |
|                            | 1.4  | 2747.6 | 106.8  | 91.59% | 37.5 |
| Average duration<br>(Days) | 6    | 2864.4 | 130    | 95.48% | 40.3 |
|                            | 8    | 2741.3 | 102.4  | 91.38% | 38.3 |
|                            | 10   | 2627.7 | 93.4   | 87.59% | 38.7 |
|                            | 12   | 2310.4 | 73.8   | 77.01% | 32.8 |
|                            | 14   | 1823.8 | 52.2   | 60.79% | 24.5 |
|                            | 16   | 1755.3 | 59.4   | 58.51% | 22.1 |
| Concurrent nodes           | 0    | 2229.3 | 77.1   | 74.31% | 30.1 |
|                            | 20   | 2210.4 | 86.7   | 73.68% | 33.8 |
|                            | 40   | 2302.2 | 67.7   | 76.74% | 30.8 |
|                            | 60   | 2444.8 | 93.2   | 81.49% | 31.6 |
|                            | 80   | 2189.8 | 92.9   | 72.99% | 29.6 |
|                            | 100  | 2167.6 | 69.5   | 72.25% | 27.5 |

### Estimation of IsT rate based on real-world data

According to the public information about the epidemic investigation, we calculated the average time from onset to reporting of the first 23 symptomatic cases in the second-wave outbreak of Covid-19 to be 2.7 days (Table S4), with case data displayed in Table S5. 2.7 days is shorter than four days we set in scenario-1, therefore, it is realistic and feasible to set the window period of the best scenario as four days. According to another cohort study in Beijing<sup>8</sup>, China, the median time interval from illness onset to laboratory confirmation is seven days (4.7–10.2), so a four day window period is rational (Table S4, S5).

**Table S4. Testing efficiency for the second-wave outbreak in Beijing, China**

| Average time from onset to reporting (first 37 cases) | Percentage of cases confirmed by contact tracing (first 37 cases) | Tests for traced contacts (first ten days) | Daily testing capacity within one month | Test efficiency for cases with fever | Test efficiency for other patients | Test efficiency for other patients | Test efficiency for normal test application | Total confirmed cases | Percentage of cases confirmed by targeted screening tests |
|-------------------------------------------------------|-------------------------------------------------------------------|--------------------------------------------|-----------------------------------------|--------------------------------------|------------------------------------|------------------------------------|---------------------------------------------|-----------------------|-----------------------------------------------------------|
| 2.7 days                                              | 68%                                                               | 2342 thousand                              | 90 to 100 thousand                      | 6h                                   | 12h                                | 6h                                 | 24h                                         | 335                   | 52%                                                       |

**Table S5. Average time from onset to reporting, and means of reporting of first 37 cases for the second-wave outbreak in Beijing, China<sup>8</sup>**

| Number of cases | Symptom         | Days from onset to reporting | Means of reporting |
|-----------------|-----------------|------------------------------|--------------------|
| 1               | fever           | 0                            | initiative         |
| 2               | fever           | 4                            | initiative         |
| 3               | fever           | 5                            | initiative         |
| 4               | fever           | 4                            | initiative         |
| 5               | fever           | 1                            | initiative         |
| 6               | fever           | 5                            | initiative         |
| 7               | fever           | 2                            | initiative         |
| 8               | no              | NA                           | tracing            |
| 9               | no              | NA                           | tracing            |
| 10              | muscle soreness | 3                            | tracing            |
| 11              | sore throat     | 2                            | tracing            |
| 12              | fever           | 0                            | initiative         |
| 13              | headache        | 8                            | tracing            |
| 14              | no              | NA                           | tracing            |
| 15              | no              | NA                           | tracing            |
| 16              | sore throat     | 1                            | tracing            |
| 17              | fever           | 4                            | tracing            |
| 18              | fever           | 0                            | initiative         |
| 19              | cough           | 1                            | tracing            |
| 20              | sneeze          | 2                            | tracing            |
| 21              | fever           | 2                            | tracing            |
| 22              | sneeze          | 8                            | tracing            |
| 23              | headache        | 1                            | tracing            |
| 24              | no              | NA                           | tracing            |
| 25              | fever           | 1                            | initiative         |
| 26              | fever           | 4                            | initiative         |
| 27              | fever           | 2                            | tracing            |
| 28              | no              | NA                           | tracing            |

|                |            |            |            |
|----------------|------------|------------|------------|
| 29             | dry throat | 2          | tracing    |
| 30             | no         | NA         | tracing    |
| 31             | no         | NA         | tracing    |
| 32             | no         | NA         | tracing    |
| 33             | no         | NA         | tracing    |
| 34             | no         | NA         | tracing    |
| 35             | no         | NA         | tracing    |
| 36             | no         | NA         | tracing    |
| 37             | no         | NA         | initiative |
| <b>Average</b> |            | <b>2.7</b> |            |

## References

1. Organization WH. Report of the WHO-China Joint Mission on Conronavirus Disease 2019(COVID-19), 2020.
2. Wang D, Hu B, Hu C, et al. Clinical Characteristics of 138 Hospitalized Patients With 2019 Novel Coronavirus–Infected Pneumonia in Wuhan, China. *JAMA* 2020;323(11):1061-69. doi: 10.1001/jama.2020.1585
3. Huang C, Wang Y, Li X, et al. Clinical features of patients infected with 2019 novel coronavirus in Wuhan, China. *The Lancet* 2020;395(10223):497-506. doi: 10.1016/S0140-6736(20)30183-5
4. Backer JA, Klinkenberg D, Wallinga J. Incubation period of 2019 novel coronavirus (2019-nCoV) infections among travellers from Wuhan, China, 20-28 January 2020. LID - 10.2807/1560-7917.ES.2020.25.5.2000062 [doi] LID - 2000062. (1560-7917 (Electronic))
5. Liu Y, Yan L-M, Wan L, et al. Viral dynamics in mild and severe cases of COVID-19. *The Lancet Infectious Diseases* 2020;20(6):656-57. doi: 10.1016/S1473-3099(20)30232-2
6. Li Q, Guan X, Wu P, et al. Early Transmission Dynamics in Wuhan, China, of Novel Coronavirus-Infected Pneumonia. (1533-4406 (Electronic))
7. Russell TW, Hellewell J, Jarvis CI, et al. Estimating the infection and case fatality ratio for coronavirus disease (COVID-19) using age-adjusted data from the outbreak on the Diamond Princess cruise ship, February 2020. LID - 10.2807/1560-7917.ES.2020.25.12.2000256 [doi] LID - 2000256. (1560-7917 (Electronic))
8. China NHCotPsRo. Official Site of National Health Commission of the People's Republic of China 2020 [Available from: [WWW.nhc.gov.cn](http://WWW.nhc.gov.cn) accessed June 2020.
