# Supplementary figures and images for: Role of efficient testing and contact tracing in mitigating the COVID-19 pandemic: a network modelling study
Source: PubMed Central journal article supplement — BMJ Open. 2021 Jul 7;11(7):e045886. doi: 10.1136/bmjopen-2020-045886 (PMC8266432; doi:10.1136/bmjopen-2020-045886), 2021-07-07

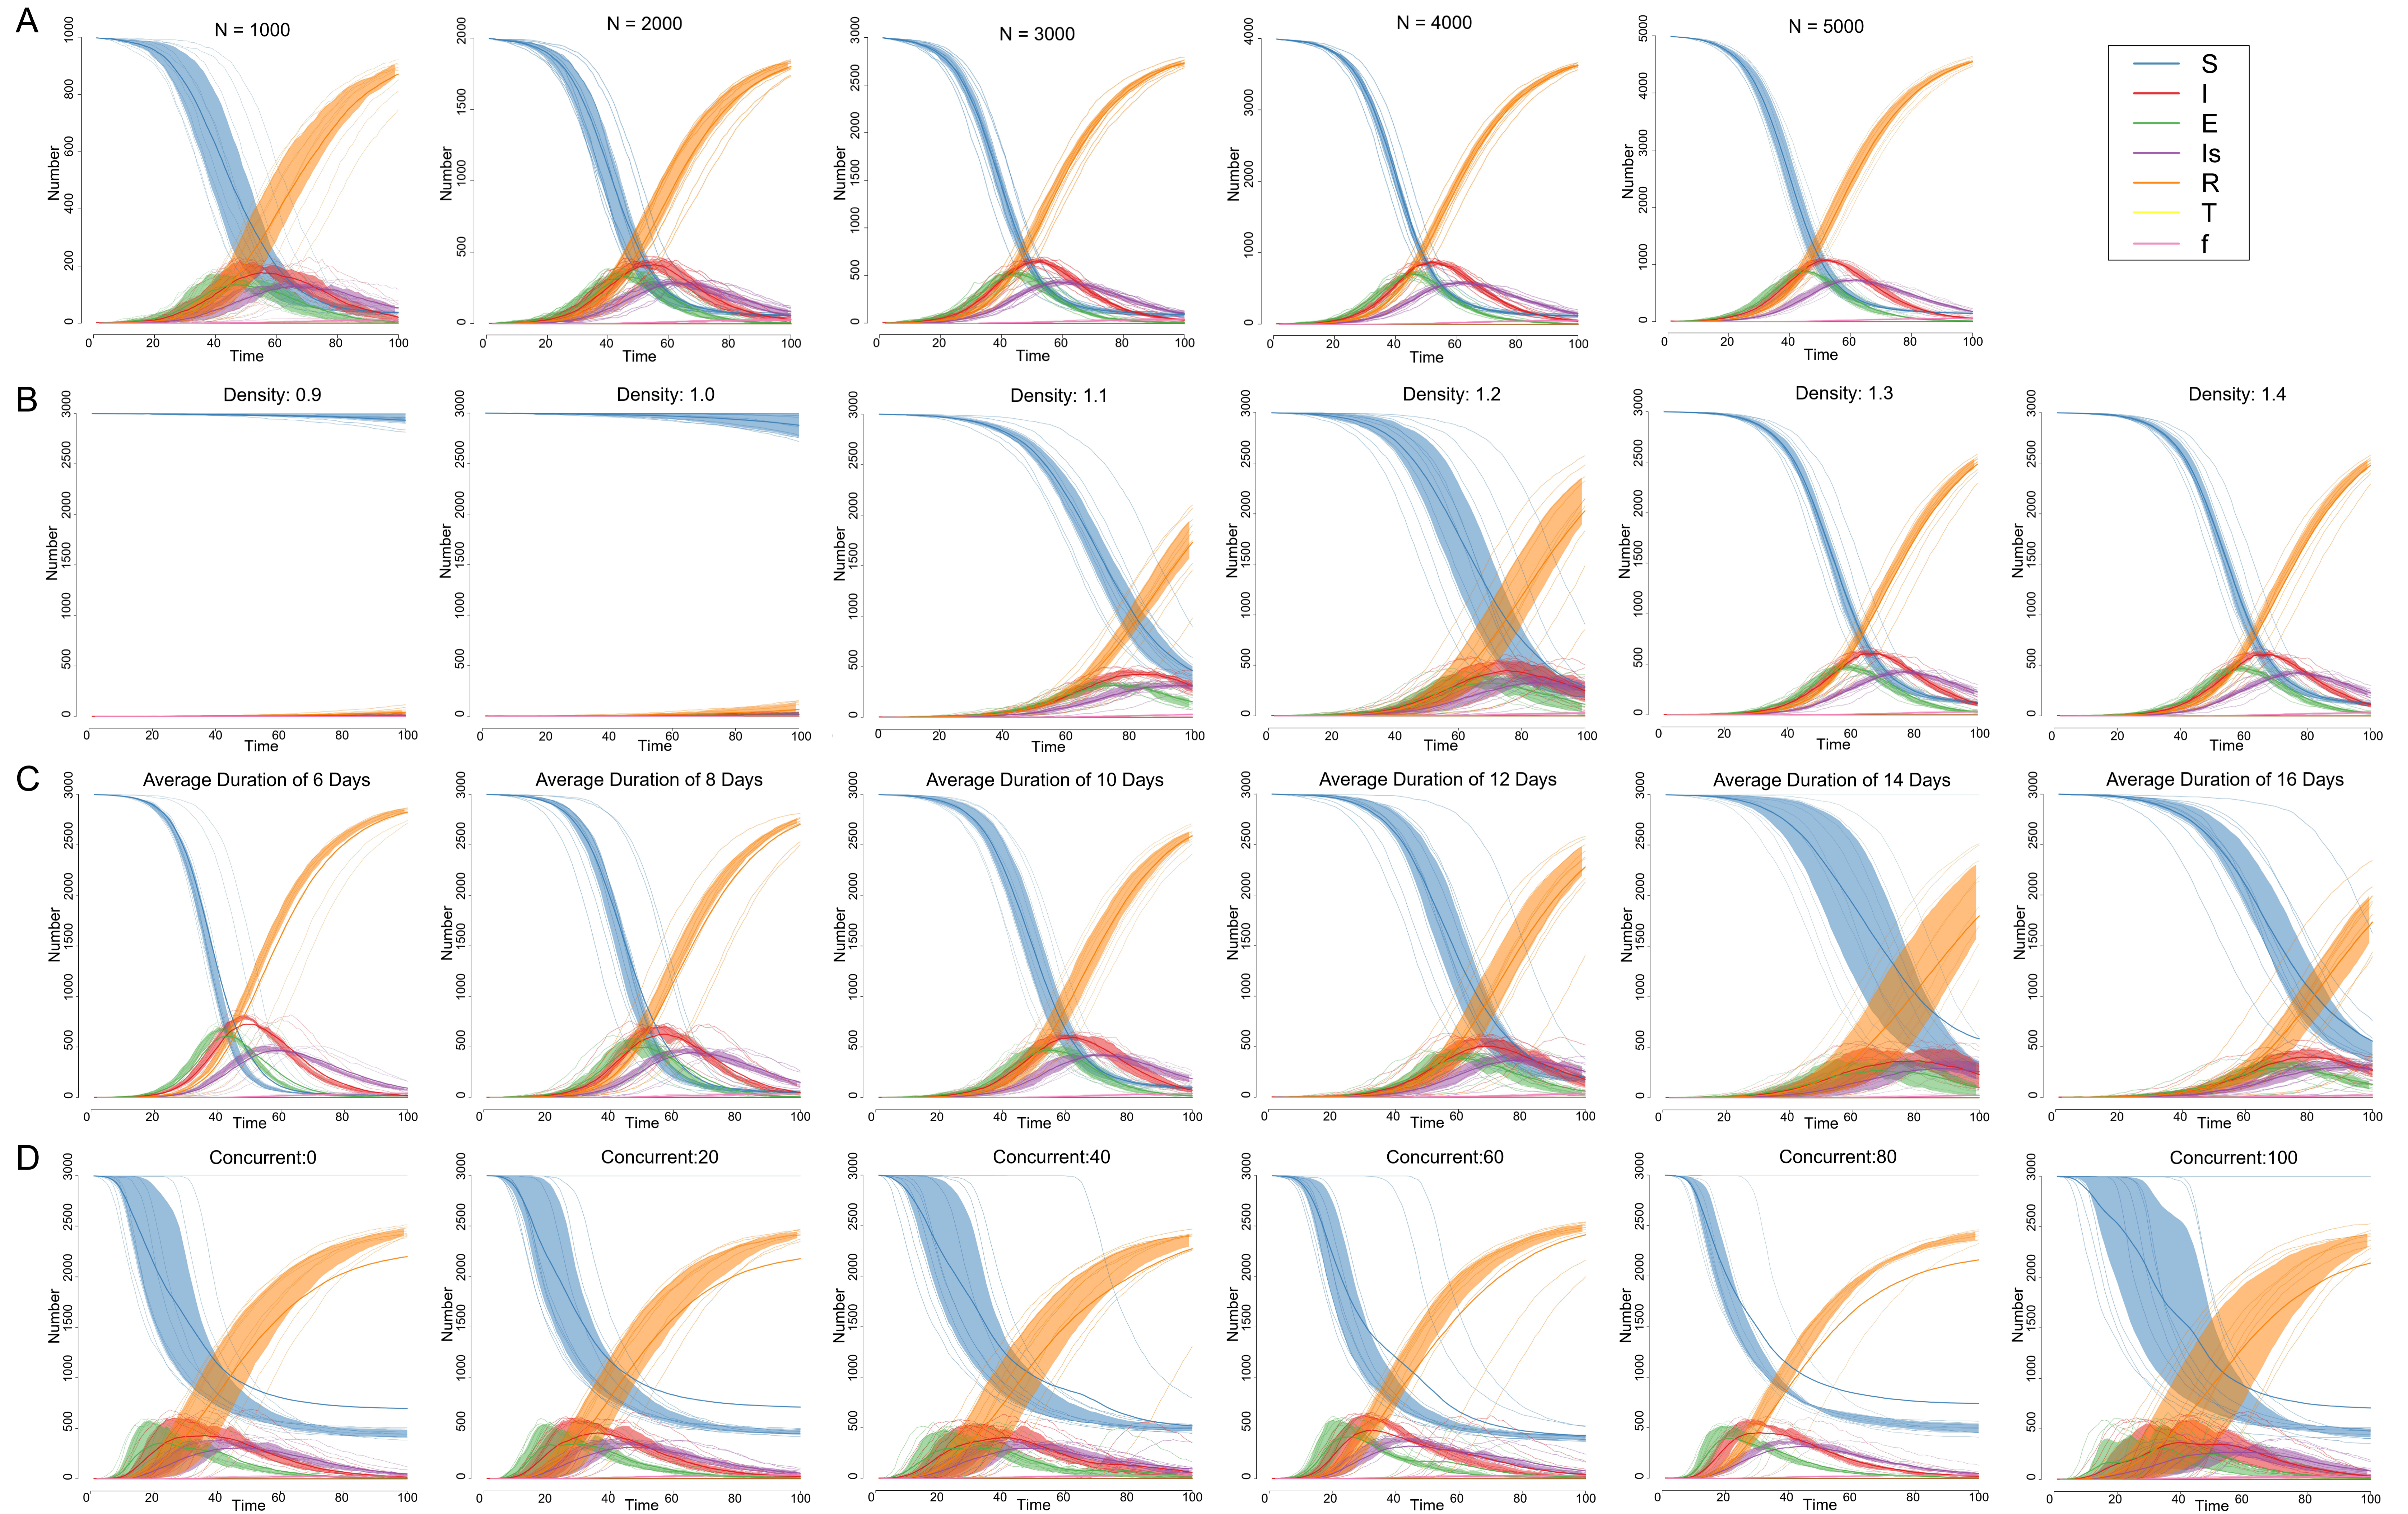

Supplement: bmjopen-2020-045886supp001.pdf [file bmjopen-2020-045886supp001.pdf]
